# Supplementary material
Source: publisher site journal article supplement (https://www.dovepress.com/get_supplementary_file.php?f=248925.xlsx)
Supplement: Supplementary file 1 [file get_supplementary_file.php]

## Sheet: S1_TargetScan
Target gene	Representative transcript	Gene name	3P-seq tags + 5	Total sites	8mer sites	7mer-m8 sites	7mer-A1 sites	6mer sites	Representative miRNA	Cumulative weighted context++ score	Total context++ score
TMEM212	ENST00000334567.5	transmembrane protein 212	5	2	2	0	0	0	hsa-miR-148a-5p	-0.76	-0.76
USP50	ENST00000532404.1	ubiquitin specific peptidase 50	5	1	1	0	0	0	hsa-miR-148a-5p	-0.71	-0.71
RP11-210M15.2	ENST00000559008.1	Uncharacterized protein	5	1	1	0	0	1	hsa-miR-148a-5p	-0.71	-0.72
ZNF286B	ENST00000285274.5	zinc finger protein 286B	5	2	1	0	1	0	hsa-miR-148a-5p	-0.68	-0.68
GMFB	ENST00000554908.1	glia maturation factor, beta	15	3	1	2	0	2	hsa-miR-148a-5p	-0.66	-0.66
NMBR	ENST00000258042.1	neuromedin B receptor	5	1	1	0	0	0	hsa-miR-148a-5p	-0.64	-0.64
ATP6V1G3	ENST00000309309.7	ATPase, H+ transporting, lysosomal 13kDa, V1 subunit G3	5	1	1	0	0	0	hsa-miR-148a-5p	-0.6	-0.6
ZNF789	ENST00000331410.5	zinc finger protein 789	204	1	1	0	0	0	hsa-miR-148a-5p	-0.6	-0.6
HIST1H2AG	ENST00000359193.2	histone cluster 1, H2ag	145	3	1	2	0	0	hsa-miR-148a-5p	-0.6	-0.6
PHTF2	ENST00000416283.2	putative homeodomain transcription factor 2	1730	3	2	1	0	1	hsa-miR-148a-5p	-0.59	-0.59
CYorf17	ENST00000382764.1	chromosome Y open reading frame 17	5	1	1	0	0	0	hsa-miR-148a-5p	-0.56	-0.56
LYRM5	ENST00000556402.1	LYR motif containing 5	40	1	1	0	0	0	hsa-miR-148a-5p	-0.56	-0.56
ACADM	ENST00000370841.4	acyl-CoA dehydrogenase, C-4 to C-12 straight chain	5800	2	1	1	0	0	hsa-miR-148a-5p	-0.54	-0.56
SPATA9	ENST00000274432.8	spermatogenesis associated 9	17	1	1	0	0	0	hsa-miR-148a-5p	-0.54	-0.54
PIGC	ENST00000344529.4	phosphatidylinositol glycan anchor biosynthesis, class C	41	1	1	0	0	0	hsa-miR-148a-5p	-0.53	-0.53
KRTAP3-2	ENST00000391587.1	keratin associated protein 3-2	5	1	1	0	0	0	hsa-miR-148a-5p	-0.53	-0.53
FAM169A	ENST00000380515.3	family with sequence similarity 169, member A	90	5	1	1	3	1	hsa-miR-148a-5p	-0.53	-0.62
IZUMO3	ENST00000543880.2	IZUMO family member 3	5	1	1	0	0	0	hsa-miR-148a-5p	-0.53	-0.53
NIN	ENST00000389868.3	ninein (GSK3B interacting protein)	594	1	1	0	0	2	hsa-miR-148a-5p	-0.52	-0.53
IL22RA2	ENST00000339602.3	interleukin 22 receptor, alpha 2	5	2	1	1	0	0	hsa-miR-148a-5p	-0.51	-0.51
TMED5	ENST00000479918.1	transmembrane emp24 protein transport domain containing 5	612	3	1	1	1	0	hsa-miR-148a-5p	-0.5	-0.59
IFI6	ENST00000361157.6	interferon, alpha-inducible protein 6	141	2	0	2	0	0	hsa-miR-148a-5p	-0.5	-0.52
TXN2	ENST00000216185.2	thioredoxin 2	3060	1	1	0	0	0	hsa-miR-148a-5p	-0.48	-0.48
RP11-215A19.2	ENST00000509111.1		5	1	1	0	0	0	hsa-miR-148a-5p	-0.48	-0.48
C5orf64	ENST00000505642.1	chromosome 5 open reading frame 64	5	3	1	0	2	0	hsa-miR-148a-5p	-0.48	-0.48
GJB5	ENST00000338513.1	gap junction protein, beta 5, 31.1kDa	5	1	1	0	0	0	hsa-miR-148a-5p	-0.48	-0.48
ESM1	ENST00000381405.4	endothelial cell-specific molecule 1	10	1	1	0	0	1	hsa-miR-148a-5p	-0.47	-0.47
MAGEA11	ENST00000333104.4	melanoma antigen family A, 11	30	1	1	0	0	0	hsa-miR-148a-5p	-0.47	-0.47
PDCD5	ENST00000419343.3	programmed cell death 5	158	2	1	0	1	0	hsa-miR-148a-5p	-0.47	-0.47
SERPINH1	ENST00000533603.1	serpin peptidase inhibitor, clade H (heat shock protein 47), member 1, (collagen binding protein 1)	5956	1	1	0	0	1	hsa-miR-148a-5p	-0.46	-0.46
TP53TG3D	ENST00000398664.3	TP53 target 3D	5	1	1	0	0	0	hsa-miR-148a-5p	-0.46	-0.46
HEBP1	ENST00000014930.4	heme binding protein 1	2855	1	1	0	0	0	hsa-miR-148a-5p	-0.46	-0.46
DNAJC24	ENST00000465995.1	DnaJ (Hsp40) homolog, subfamily C, member 24	424	4	0	3	1	2	hsa-miR-148a-5p	-0.46	-0.6
CYP3A5	ENST00000339843.2	cytochrome P450, family 3, subfamily A, polypeptide 5	5	2	1	1	0	0	hsa-miR-148a-5p	-0.46	-0.46
RRS1	ENST00000320270.2	RRS1 ribosome biogenesis regulator homolog (S. cerevisiae)	1793	1	1	0	0	0	hsa-miR-148a-5p	-0.46	-0.46
GSR	ENST00000221130.5	glutathione reductase	858	2	1	1	0	1	hsa-miR-148a-5p	-0.46	-0.53
C6orf62	ENST00000378119.4	chromosome 6 open reading frame 62	300	1	1	0	0	0	hsa-miR-148a-5p	-0.46	-0.46
TP53TG3	ENST00000398682.4	TP53 target 3	5	1	1	0	0	0	hsa-miR-148a-5p	-0.45	-0.45
TP53TG3B	ENST00000341305.5	TP53 target 3B	5	1	1	0	0	0	hsa-miR-148a-5p	-0.45	-0.45
TP53TG3C	ENST00000398667.4	TP53 target 3C	5	1	1	0	0	0	hsa-miR-148a-5p	-0.45	-0.45
OIP5	ENST00000220514.3	Opa interacting protein 5	178	1	1	0	0	0	hsa-miR-148a-5p	-0.44	-0.44
UCHL5	ENST00000367455.4	ubiquitin carboxyl-terminal hydrolase L5	1150	2	1	1	0	0	hsa-miR-148a-5p	-0.43	-0.45
TMEM232	ENST00000429839.2	transmembrane protein 232	5	2	1	1	0	2	hsa-miR-148a-5p	-0.43	-0.43
OAS1	ENST00000452357.2	2'-5'-oligoadenylate synthetase 1, 40/46kDa	9	1	1	0	0	0	hsa-miR-148a-5p	-0.42	-0.42
AP4M1	ENST00000359593.4	adaptor-related protein complex 4, mu 1 subunit	163	1	1	0	0	0	hsa-miR-148a-5p	-0.42	-0.42
HSPA5	ENST00000324460.6	heat shock 70kDa protein 5 (glucose-regulated protein, 78kDa)	2715	1	1	0	0	1	hsa-miR-148a-5p	-0.42	-0.42
NEU3	ENST00000532963.1	sialidase 3 (membrane sialidase)	243	2	1	0	1	0	hsa-miR-148a-5p	-0.42	-0.43
FGF5	ENST00000456523.3	fibroblast growth factor 5	1478	3	0	2	1	0	hsa-miR-148a-5p	-0.42	-0.52
ZNF300	ENST00000427179.1	zinc finger protein 300	107	2	1	1	0	1	hsa-miR-148a-5p	-0.41	-0.41
PATE2	ENST00000358524.3	prostate and testis expressed 2	5	2	1	1	0	0	hsa-miR-148a-5p	-0.41	-0.54
C19orf82	ENST00000587536.1	chromosome 19 open reading frame 82	5	1	1	0	0	0	hsa-miR-148a-5p	-0.41	-0.41
SPOCK3	ENST00000357154.3	sparc/osteonectin, cwcv and kazal-like domains proteoglycan (testican) 3	46	2	1	1	0	0	hsa-miR-148a-5p	-0.41	-0.41
TFRC	ENST00000540528.1	transferrin receptor	296	3	0	3	0	0	hsa-miR-148a-5p	-0.41	-0.42
ZNF286A	ENST00000395894.2	Zinc finger protein 286A	19	1	1	0	0	0	hsa-miR-148a-5p	-0.4	-0.4
CDC73	ENST00000367435.3	cell division cycle 73	579	3	2	0	1	3	hsa-miR-148a-5p	-0.4	-0.45
FKBP3	ENST00000216330.3	FK506 binding protein 3, 25kDa	3211	2	0	2	0	0	hsa-miR-148a-5p	-0.4	-0.41
IL6	ENST00000404625.1	interleukin 6 (interferon, beta 2)	472	1	1	0	0	0	hsa-miR-148a-5p	-0.38	-0.38
ARL6	ENST00000463745.1	ADP-ribosylation factor-like 6	275	2	1	1	0	0	hsa-miR-148a-5p	-0.38	-0.42
CCNI	ENST00000237654.4	cyclin I	12152	1	1	0	0	1	hsa-miR-148a-5p	-0.38	-0.38
VASH2	ENST00000366968.4	vasohibin 2	70	3	0	3	0	1	hsa-miR-148a-5p	-0.38	-0.39
ERLIN1	ENST00000421367.2	ER lipid raft associated 1	86	2	1	1	0	0	hsa-miR-148a-5p	-0.38	-0.39
MRPL27	ENST00000442592.3	mitochondrial ribosomal protein L27	503	1	1	0	0	0	hsa-miR-148a-5p	-0.37	-0.38
TMED7	ENST00000456936.3	transmembrane emp24 protein transport domain containing 7	1571	2	1	1	0	0	hsa-miR-148a-5p	-0.37	-0.39
NIPSNAP1	ENST00000216121.7	nipsnap homolog 1 (C. elegans)	2429	2	1	1	0	0	hsa-miR-148a-5p	-0.37	-0.37
TRAM1L1	ENST00000310754.4	translocation associated membrane protein 1-like 1	7	1	1	0	0	0	hsa-miR-148a-5p	-0.37	-0.37
GRIA4	ENST00000527669.1	glutamate receptor, ionotropic, AMPA 4	7	1	1	0	0	0	hsa-miR-148a-5p	-0.37	-0.37
COL10A1	ENST00000243222.4	collagen, type X, alpha 1	5	2	1	1	0	0	hsa-miR-148a-5p	-0.36	-0.36
AGL	ENST00000370161.2	amylo-alpha-1, 6-glucosidase, 4-alpha-glucanotransferase	48	2	1	1	0	0	hsa-miR-148a-5p	-0.36	-0.36
PF4	ENST00000296029.3	platelet factor 4	11	1	0	1	0	0	hsa-miR-148a-5p	-0.36	-0.36
MICU2	ENST00000382374.4	mitochondrial calcium uptake 2	68	1	1	0	0	0	hsa-miR-148a-5p	-0.36	-0.42
RAB8B	ENST00000321437.4	RAB8B, member RAS oncogene family	45	4	2	0	2	3	hsa-miR-148a-5p	-0.36	-0.5
ST6GALNAC3	ENST00000328299.3	ST6 (alpha-N-acetyl-neuraminyl-2,3-beta-galactosyl-1,3)-N-acetylgalactosaminide alpha-2,6-sialyltransferase 3	41	3	1	0	2	0	hsa-miR-148a-5p	-0.36	-0.38
UBE2G1	ENST00000396981.2	ubiquitin-conjugating enzyme E2G 1	5620	3	0	3	0	2	hsa-miR-148a-5p	-0.36	-0.44
DNASE2	ENST00000222219.3	deoxyribonuclease II, lysosomal	75	1	1	0	0	0	hsa-miR-148a-5p	-0.36	-0.36
CHGB	ENST00000378961.4	chromogranin B (secretogranin 1)	57	1	1	0	0	0	hsa-miR-148a-5p	-0.36	-0.36
HIST1H4C	ENST00000377803.2	histone cluster 1, H4c	11	1	0	1	0	0	hsa-miR-148a-5p	-0.36	-0.42
CSNK1A1	ENST00000261798.5	casein kinase 1, alpha 1	769	2	1	1	0	1	hsa-miR-148a-5p	-0.36	-0.36
GATC	ENST00000551765.1	glutamyl-tRNA(Gln) amidotransferase, subunit C	781	2	1	0	1	1	hsa-miR-148a-5p	-0.35	-0.47
AF131215.5	ENST00000400102.3		5	1	0	1	0	0	hsa-miR-148a-5p	-0.35	-0.35
ZNF846	ENST00000586293.1	zinc finger protein 846	10	2	0	2	0	0	hsa-miR-148a-5p	-0.35	-0.46
ZFP42	ENST00000326866.4	ZFP42 zinc finger protein	5	2	0	2	0	0	hsa-miR-148a-5p	-0.35	-0.35
AGMAT	ENST00000375826.3	agmatine ureohydrolase (agmatinase)	331	1	1	0	0	1	hsa-miR-148a-5p	-0.35	-0.36
STIL	ENST00000360380.3	SCL/TAL1 interrupting locus	344	1	1	0	0	0	hsa-miR-148a-5p	-0.35	-0.35
NUP50	ENST00000347635.4	nucleoporin 50kDa	57	1	1	0	0	0	hsa-miR-148a-5p	-0.35	-0.35
SIX4	ENST00000216513.4	SIX homeobox 4	94	3	2	0	1	2	hsa-miR-148a-5p	-0.35	-0.43
THUMPD3	ENST00000345094.3	THUMP domain containing 3	445	2	1	1	0	0	hsa-miR-148a-5p	-0.35	-0.48
OMD	ENST00000375550.4	osteomodulin	5	1	1	0	0	0	hsa-miR-148a-5p	-0.35	-0.35
MAB21L1	ENST00000379919.4	mab-21-like 1 (C. elegans)	25	2	1	0	1	1	hsa-miR-148a-5p	-0.35	-0.46
SEPT10	ENST00000397712.2	septin 10	50	1	1	0	0	0	hsa-miR-148a-5p	-0.35	-0.35
OPALIN	ENST00000371172.3	oligodendrocytic myelin paranodal and inner loop protein	5	1	1	0	0	0	hsa-miR-148a-5p	-0.34	-0.34
C7orf13	ENST00000333319.6	chromosome 7 open reading frame 13	14	1	1	0	0	1	hsa-miR-148a-5p	-0.34	-0.36
RPA3-AS1	ENST00000406829.1	RPA3 antisense RNA 1	22	2	0	1	1	0	hsa-miR-148a-5p	-0.34	-0.34
SIGLEC12	ENST00000291707.3	sialic acid binding Ig-like lectin 12 (gene/pseudogene)	5	1	1	0	0	0	hsa-miR-148a-5p	-0.34	-0.34
ABRACL	ENST00000367660.3	ABRA C-terminal like	3336	2	0	2	0	0	hsa-miR-148a-5p	-0.34	-0.36
PIK3C2A	ENST00000265970.7	phosphatidylinositol-4-phosphate 3-kinase, catalytic subunit type 2 alpha	280	2	1	1	0	1	hsa-miR-148a-5p	-0.34	-0.36
C6orf195	ENST00000296847.3	chromosome 6 open reading frame 195	5	1	1	0	0	0	hsa-miR-148a-5p	-0.34	-0.34
DCAF4	ENST00000394234.2	DDB1 and CUL4 associated factor 4	45	1	1	0	0	0	hsa-miR-148a-5p	-0.34	-0.34
PPP2R2A	ENST00000380737.3	protein phosphatase 2, regulatory subunit B, alpha	236	2	1	1	0	0	hsa-miR-148a-5p	-0.34	-0.36
KBTBD6	ENST00000379485.1	kelch repeat and BTB (POZ) domain containing 6	51	2	1	1	0	0	hsa-miR-148a-5p	-0.33	-0.37
ZNF589	ENST00000427617.2	zinc finger protein 589	20	1	1	0	0	2	hsa-miR-148a-5p	-0.33	-0.33
AL021546.6	ENST00000551806.1	Glutamyl-tRNA(Gln) amidotransferase subunit C, mitochondrial	781	2	1	0	1	1	hsa-miR-148a-5p	-0.33	-0.44
LEFTY2	ENST00000420304.2	left-right determination factor 2	5	2	0	2	0	0	hsa-miR-148a-5p	-0.33	-0.33
USP3	ENST00000380324.3	ubiquitin specific peptidase 3	583	1	1	0	0	1	hsa-miR-148a-5p	-0.33	-0.33
MBLAC2	ENST00000316610.6	metallo-beta-lactamase domain containing 2	498	1	1	0	0	2	hsa-miR-148a-5p	-0.33	-0.33
ANKRD49	ENST00000544253.1	ankyrin repeat domain 49	32	2	2	0	0	0	hsa-miR-148a-5p	-0.33	-0.47
GPR4	ENST00000323040.4	G protein-coupled receptor 4	5	1	1	0	0	0	hsa-miR-148a-5p	-0.33	-0.33
TM6SF2	ENST00000389363.4	transmembrane 6 superfamily member 2	17	1	1	0	0	0	hsa-miR-148a-5p	-0.33	-0.33
FDXACB1	ENST00000260257.4	ferredoxin-fold anticodon binding domain containing 1	60	1	1	0	0	0	hsa-miR-148a-5p	-0.33	-0.35
CLEC1B	ENST00000428126.2	C-type lectin domain family 1, member B	5	2	1	1	0	0	hsa-miR-148a-5p	-0.32	-0.32
PPP1R1C	ENST00000409137.3	protein phosphatase 1, regulatory (inhibitor) subunit 1C	5	1	1	0	0	0	hsa-miR-148a-5p	-0.32	-0.32
SMKR1	ENST00000462322.2	small lysine-rich protein 1	243	1	0	1	0	0	hsa-miR-148a-5p	-0.32	-0.32
AC140061.12	ENST00000598429.1	Uncharacterized protein	11	1	1	0	0	0	hsa-miR-148a-5p	-0.32	-0.32
EDN2	ENST00000372587.4	endothelin 2	5	1	0	1	0	1	hsa-miR-148a-5p	-0.32	-0.32
JMJD1C	ENST00000399251.1	jumonji domain containing 1C	60	1	1	0	0	1	hsa-miR-148a-5p	-0.32	-0.33
GABRG2	ENST00000356592.3	gamma-aminobutyric acid (GABA) A receptor, gamma 2	24	3	1	1	1	1	hsa-miR-148a-5p	-0.32	-0.34
ACBD7	ENST00000356189.5	acyl-CoA binding domain containing 7	34	1	1	0	0	0	hsa-miR-148a-5p	-0.32	-0.32
SFRP4	ENST00000436072.2	secreted frizzled-related protein 4	5	1	1	0	0	0	hsa-miR-148a-5p	-0.32	-0.32
C21orf59	ENST00000382549.4	chromosome 21 open reading frame 59	288	1	1	0	0	1	hsa-miR-148a-5p	-0.31	-0.31
SIAE	ENST00000263593.3	sialic acid acetylesterase	22	2	1	1	0	2	hsa-miR-148a-5p	-0.31	-0.39
TCEAL1	ENST00000372625.3	transcription elongation factor A (SII)-like 1	23	1	0	1	0	0	hsa-miR-148a-5p	-0.31	-0.31
CDC42SE2	ENST00000505065.1	CDC42 small effector 2	1057	2	0	1	1	1	hsa-miR-148a-5p	-0.31	-0.31
CFHR1	ENST00000320493.5	complement factor H-related 1	5	1	0	1	0	0	hsa-miR-148a-5p	-0.31	-0.31
TPTE	ENST00000298232.7	transmembrane phosphatase with tensin homology	5	2	0	2	0	0	hsa-miR-148a-5p	-0.31	-0.31
ZMAT1	ENST00000372782.3	zinc finger, matrin-type 1	5	1	1	0	0	1	hsa-miR-148a-5p	-0.31	-0.31
LECT2	ENST00000274507.1	leukocyte cell-derived chemotaxin 2	5	1	0	1	0	0	hsa-miR-148a-5p	-0.31	-0.31
NBR1	ENST00000542611.1	neighbor of BRCA1 gene 1	1982	2	1	1	0	0	hsa-miR-148a-5p	-0.31	-0.32
LXN	ENST00000264265.3	latexin	8	1	0	1	0	0	hsa-miR-148a-5p	-0.31	-0.31
MARCKS	ENST00000368635.4	myristoylated alanine-rich protein kinase C substrate	188	3	0	3	0	1	hsa-miR-148a-5p	-0.31	-0.34
DEK	ENST00000397239.3	DEK oncogene	561	1	1	0	0	1	hsa-miR-148a-5p	-0.3	-0.31
FGF10	ENST00000264664.4	fibroblast growth factor 10	5	1	1	0	0	0	hsa-miR-148a-5p	-0.3	-0.3
TMEM167B	ENST00000338272.8	transmembrane protein 167B	42	3	0	3	0	0	hsa-miR-148a-5p	-0.3	-0.45
C2orf91	ENST00000378711.2	chromosome 2 open reading frame 91	5	1	1	0	0	0	hsa-miR-148a-5p	-0.3	-0.3
FMO5	ENST00000441068.2	flavin containing monooxygenase 5	9	1	0	1	0	0	hsa-miR-148a-5p	-0.3	-0.3
RAD54B	ENST00000297592.5	RAD54 homolog B (S. cerevisiae)	36	3	1	2	0	0	hsa-miR-148a-5p	-0.3	-0.35
MTFR1	ENST00000458689.2	mitochondrial fission regulator 1	1051	1	1	0	0	0	hsa-miR-148a-5p	-0.3	-0.31
PDPK1	ENST00000441549.3	3-phosphoinositide dependent protein kinase-1	104	2	1	1	0	0	hsa-miR-148a-5p	-0.3	-0.32
RBM18	ENST00000417201.3	RNA binding motif protein 18	963	3	1	0	2	1	hsa-miR-148a-5p	-0.3	-0.48
WDR16	ENST00000352665.5	WD repeat domain 16	5	1	0	1	0	0	hsa-miR-148a-5p	-0.3	-0.3
COBLL1	ENST00000375458.2	cordon-bleu WH2 repeat protein-like 1	70	4	1	3	0	1	hsa-miR-148a-5p	-0.3	-0.38
YBX1	ENST00000321358.7	Y box binding protein 1	4740	1	0	1	0	0	hsa-miR-148a-5p	-0.29	-0.29
CX3CR1	ENST00000399220.2	chemokine (C-X3-C motif) receptor 1	17	2	0	2	0	0	hsa-miR-148a-5p	-0.29	-0.29
FAM111B	ENST00000411426.1	family with sequence similarity 111, member B	39	2	1	0	1	0	hsa-miR-148a-5p	-0.29	-0.29
ZDHHC22	ENST00000319374.4	zinc finger, DHHC-type containing 22	32	1	1	0	0	0	hsa-miR-148a-5p	-0.29	-0.29
SETD6	ENST00000394266.4	SET domain containing 6	121	1	0	1	0	0	hsa-miR-148a-5p	-0.29	-0.29
NKX2-4	ENST00000351817.4	NK2 homeobox 4	132	1	1	0	0	0	hsa-miR-148a-5p	-0.29	-0.32
COLEC12	ENST00000400256.3	collectin sub-family member 12	72	1	1	0	0	0	hsa-miR-148a-5p	-0.29	-0.29
PKP2	ENST00000340811.4	plakophilin 2	265	2	1	1	0	0	hsa-miR-148a-5p	-0.29	-0.3
HMGCLL1	ENST00000274901.4	3-hydroxymethyl-3-methylglutaryl-CoA lyase-like 1	11	1	0	1	0	2	hsa-miR-148a-5p	-0.29	-0.29
KHSRP	ENST00000398148.3	KH-type splicing regulatory protein	4469	1	1	0	0	0	hsa-miR-148a-5p	-0.29	-0.29
ZNF214	ENST00000278314.4	zinc finger protein 214	7	1	1	0	0	0	hsa-miR-148a-5p	-0.29	-0.39
OR9A4	ENST00000548136.1	olfactory receptor, family 9, subfamily A, member 4	5	1	0	1	0	0	hsa-miR-148a-5p	-0.29	-0.29
GDE1	ENST00000353258.3	glycerophosphodiester phosphodiesterase 1	2741	2	0	1	1	1	hsa-miR-148a-5p	-0.29	-0.32
PSME3	ENST00000541124.1	proteasome (prosome, macropain) activator subunit 3 (PA28 gamma; Ki)	3605	1	0	1	0	1	hsa-miR-148a-5p	-0.29	-0.29
ELL3	ENST00000319359.3	elongation factor RNA polymerase II-like 3	29	1	0	1	0	1	hsa-miR-148a-5p	-0.28	-0.28
C1orf52	ENST00000471115.1	chromosome 1 open reading frame 52	1516	1	0	1	0	1	hsa-miR-148a-5p	-0.28	-0.28
CDK5R1	ENST00000313401.3	cyclin-dependent kinase 5, regulatory subunit 1 (p35)	335	1	1	0	0	0	hsa-miR-148a-5p	-0.28	-0.29
GJC1	ENST00000426548.1	gap junction protein, gamma 1, 45kDa	195	2	0	2	0	2	hsa-miR-148a-5p	-0.28	-0.28
FAM92B	ENST00000539556.1	family with sequence similarity 92, member B	5	1	1	0	0	0	hsa-miR-148a-5p	-0.28	-0.28
SYCP3	ENST00000266743.2	synaptonemal complex protein 3	5	1	0	1	0	0	hsa-miR-148a-5p	-0.28	-0.28
KIAA0101	ENST00000558008.1	KIAA0101	6821	1	0	1	0	0	hsa-miR-148a-5p	-0.28	-0.28
G3BP2	ENST00000395719.3	GTPase activating protein (SH3 domain) binding protein 2	4413	3	0	2	1	0	hsa-miR-148a-5p	-0.28	-0.35
SMIM8	ENST00000392863.1	small integral membrane protein 8	449	1	1	0	0	1	hsa-miR-148a-5p	-0.28	-0.46
ENPP4	ENST00000321037.4	ectonucleotide pyrophosphatase/phosphodiesterase 4 (putative)	114	1	1	0	0	0	hsa-miR-148a-5p	-0.28	-0.28
C5orf54	ENST00000408953.3	chromosome 5 open reading frame 54	15	1	0	1	0	0	hsa-miR-148a-5p	-0.28	-0.28
HMGCS2	ENST00000369406.3	3-hydroxy-3-methylglutaryl-CoA synthase 2 (mitochondrial)	63	1	0	1	0	0	hsa-miR-148a-5p	-0.28	-0.28
PSTK	ENST00000405485.1	phosphoseryl-tRNA kinase	530	1	1	0	0	0	hsa-miR-148a-5p	-0.28	-0.28
GTF3C6	ENST00000329970.7	general transcription factor IIIC, polypeptide 6, alpha 35kDa	232	1	0	1	0	0	hsa-miR-148a-5p	-0.28	-0.28
TIPRL	ENST00000367833.2	TIP41, TOR signaling pathway regulator-like (S. cerevisiae)	569	1	1	0	0	1	hsa-miR-148a-5p	-0.27	-0.33
ADSS	ENST00000366535.3	adenylosuccinate synthase	2881	1	1	0	0	0	hsa-miR-148a-5p	-0.27	-0.28
YARS2	ENST00000324868.8	tyrosyl-tRNA synthetase 2, mitochondrial	192	1	1	0	0	0	hsa-miR-148a-5p	-0.27	-0.33
C4orf46	ENST00000508457.1	chromosome 4 open reading frame 46	128	1	0	1	0	2	hsa-miR-148a-5p	-0.27	-0.29
METTL14	ENST00000388822.5	methyltransferase like 14	520	2	1	1	0	2	hsa-miR-148a-5p	-0.27	-0.34
C3orf38	ENST00000486971.1	chromosome 3 open reading frame 38	683	1	1	0	0	0	hsa-miR-148a-5p	-0.27	-0.51
GYPA	ENST00000360771.4	glycophorin A (MNS blood group)	5	1	1	0	0	1	hsa-miR-148a-5p	-0.27	-0.27
SCP2D1	ENST00000377428.2	SCP2 sterol-binding domain containing 1	5	1	0	1	0	0	hsa-miR-148a-5p	-0.27	-0.27
ELF1	ENST00000442101.1	E74-like factor 1 (ets domain transcription factor)	466	1	1	0	0	0	hsa-miR-148a-5p	-0.27	-0.27
CALCB	ENST00000523376.1	calcitonin-related polypeptide beta	39	1	0	1	0	1	hsa-miR-148a-5p	-0.27	-0.27
AKAP5	ENST00000394718.4	A kinase (PRKA) anchor protein 5	75	2	1	1	0	0	hsa-miR-148a-5p	-0.27	-0.28
GTPBP3	ENST00000324894.8	GTP binding protein 3 (mitochondrial)	1451	2	0	2	0	0	hsa-miR-148a-5p	-0.27	-0.27
NDE1	ENST00000396353.2	nudE neurodevelopment protein 1	25	2	1	1	0	1	hsa-miR-148a-5p	-0.27	-0.27
TOMM20	ENST00000366607.4	translocase of outer mitochondrial membrane 20 homolog (yeast)	674	3	1	1	1	0	hsa-miR-148a-5p	-0.27	-0.54
CRP	ENST00000255030.5	C-reactive protein, pentraxin-related	5	1	1	0	0	0	hsa-miR-148a-5p	-0.27	-0.27
THUMPD1	ENST00000381337.2	THUMP domain containing 1	39	2	1	1	0	0	hsa-miR-148a-5p	-0.27	-0.27
ZNF721	ENST00000338977.5	zinc finger protein 721	249	2	1	0	1	0	hsa-miR-148a-5p	-0.27	-0.28
AC012215.1	ENST00000437887.1	Uncharacterized protein	31	2	0	1	1	0	hsa-miR-148a-5p	-0.27	-0.27
CREG1	ENST00000370509.4	cellular repressor of E1A-stimulated genes 1	318	2	0	1	1	0	hsa-miR-148a-5p	-0.26	-0.3
PHTF1	ENST00000393357.2	putative homeodomain transcription factor 1	444	1	0	1	0	0	hsa-miR-148a-5p	-0.26	-0.27
GOLIM4	ENST00000470487.1	golgi integral membrane protein 4	48	1	1	0	0	0	hsa-miR-148a-5p	-0.26	-0.26
BNIP2	ENST00000267859.3	BCL2/adenovirus E1B 19kDa interacting protein 2	1255	3	1	1	1	2	hsa-miR-148a-5p	-0.26	-0.45
RPL41	ENST00000546591.1	ribosomal protein L41	245	1	0	1	0	0	hsa-miR-148a-5p	-0.26	-0.26
EDNRA	ENST00000339690.5	endothelin receptor type A	35	2	1	0	1	0	hsa-miR-148a-5p	-0.26	-0.26
GRAMD1C	ENST00000358160.4	GRAM domain containing 1C	12	2	0	1	1	0	hsa-miR-148a-5p	-0.26	-0.26
FOXB1	ENST00000396057.4	forkhead box B1	31	3	1	2	0	1	hsa-miR-148a-5p	-0.26	-0.29
RIOK1	ENST00000379834.2	RIO kinase 1	1496	1	0	1	0	0	hsa-miR-148a-5p	-0.26	-0.26
TMEM235	ENST00000586400.1	transmembrane protein 235	5	1	0	1	0	0	hsa-miR-148a-5p	-0.26	-0.26
ATP6V1G1	ENST00000374050.3	ATPase, H+ transporting, lysosomal 13kDa, V1 subunit G1	8219	2	0	2	0	0	hsa-miR-148a-5p	-0.26	-0.34
GREM2	ENST00000318160.4	gremlin 2, DAN family BMP antagonist	631	1	1	0	0	0	hsa-miR-148a-5p	-0.26	-0.26
LRRC19	ENST00000380055.5	leucine rich repeat containing 19	5	1	1	0	0	0	hsa-miR-148a-5p	-0.26	-0.26
HGD	ENST00000283871.5	homogentisate 1,2-dioxygenase	4612	1	0	1	0	0	hsa-miR-148a-5p	-0.26	-0.26
ATXN7L3B	ENST00000519948.2	ataxin 7-like 3B	55	1	1	0	0	0	hsa-miR-148a-5p	-0.26	-0.26
C1orf213	ENST00000335648.3	chromosome 1 open reading frame 213	49	1	1	0	0	1	hsa-miR-148a-5p	-0.26	-0.26
FAM174A	ENST00000312637.4	family with sequence similarity 174, member A	246	1	0	1	0	0	hsa-miR-148a-5p	-0.26	-0.26
ZFP30	ENST00000392144.1	ZFP30 zinc finger protein	41	2	0	2	0	1	hsa-miR-148a-5p	-0.26	-0.34
MAD2L1BP	ENST00000372171.4	MAD2L1 binding protein	1294	2	0	0	2	0	hsa-miR-148a-5p	-0.26	-0.33
TMEM213	ENST00000442682.2	transmembrane protein 213	5	1	1	0	0	0	hsa-miR-148a-5p	-0.26	-0.26
C19orf43	ENST00000588213.1	chromosome 19 open reading frame 43	1264	1	0	1	0	0	hsa-miR-148a-5p	-0.25	-0.26
GPR88	ENST00000315033.4	G protein-coupled receptor 88	5	2	1	1	0	0	hsa-miR-148a-5p	-0.25	-0.25
RNF111	ENST00000348370.4	ring finger protein 111	395	2	1	0	1	0	hsa-miR-148a-5p	-0.25	-0.25
GADL1	ENST00000282538.5	glutamate decarboxylase-like 1	5	1	1	0	0	1	hsa-miR-148a-5p	-0.25	-0.25
PSG2	ENST00000406487.1	pregnancy specific beta-1-glycoprotein 2	5	1	0	1	0	0	hsa-miR-148a-5p	-0.25	-0.25
WBP5	ENST00000372661.3	WW domain binding protein 5	32	1	0	1	0	0	hsa-miR-148a-5p	-0.25	-0.28
LEPR	ENST00000371060.3	leptin receptor	169	2	1	1	0	1	hsa-miR-148a-5p	-0.25	-0.25
C3orf80	ENST00000326474.3	chromosome 3 open reading frame 80	296	1	1	0	0	0	hsa-miR-148a-5p	-0.25	-0.25
F13B	ENST00000367412.1	coagulation factor XIII, B polypeptide	10	1	1	0	0	0	hsa-miR-148a-5p	-0.25	-0.64
PP13439	ENST00000331659.2		289	1	1	0	0	1	hsa-miR-148a-5p	-0.25	-0.25
NUPR1L	ENST00000329309.3	nuclear protein, transcriptional regulator, 1-like	5	1	0	1	0	0	hsa-miR-148a-5p	-0.25	-0.25
SLC25A24	ENST00000565488.1	solute carrier family 25 (mitochondrial carrier; phosphate carrier), member 24	1688	1	1	0	0	1	hsa-miR-148a-5p	-0.25	-0.25
TRMT61B	ENST00000306108.5	tRNA methyltransferase 61 homolog B (S. cerevisiae)	450	1	0	1	0	0	hsa-miR-148a-5p	-0.25	-0.25
PSG11	ENST00000401740.1	pregnancy specific beta-1-glycoprotein 11	5	1	0	1	0	0	hsa-miR-148a-5p	-0.25	-0.25
H2AFY2	ENST00000373255.4	H2A histone family, member Y2	46	1	0	1	0	0	hsa-miR-148a-5p	-0.25	-0.25
TMEM236	ENST00000480516.1		5	2	2	0	0	0	hsa-miR-148a-5p	-0.25	-0.25
MIPEP	ENST00000382172.3	mitochondrial intermediate peptidase	92	1	0	1	0	0	hsa-miR-148a-5p	-0.24	-0.24
CSGALNACT2	ENST00000374466.3	chondroitin sulfate N-acetylgalactosaminyltransferase 2	128	1	1	0	0	0	hsa-miR-148a-5p	-0.24	-0.24
ASB4	ENST00000325885.5	ankyrin repeat and SOCS box containing 4	5	1	1	0	0	1	hsa-miR-148a-5p	-0.24	-0.24
FAM102B	ENST00000370035.3	family with sequence similarity 102, member B	392	1	1	0	0	0	hsa-miR-148a-5p	-0.24	-0.24
PIAS2	ENST00000585916.1	protein inhibitor of activated STAT, 2	194	1	1	0	0	0	hsa-miR-148a-5p	-0.24	-0.28
FAM92A1	ENST00000518322.1	family with sequence similarity 92, member A1	80	1	0	1	0	0	hsa-miR-148a-5p	-0.24	-0.24
MDFIC	ENST00000393486.1	MyoD family inhibitor domain containing	601	1	1	0	0	0	hsa-miR-148a-5p	-0.24	-0.28
PRPF18	ENST00000378572.3	pre-mRNA processing factor 18	551	1	0	1	0	1	hsa-miR-148a-5p	-0.24	-0.27
CLK2	ENST00000361168.5	CDC-like kinase 2	77	1	0	1	0	0	hsa-miR-148a-5p	-0.24	-0.24
TM2D1	ENST00000606498.1	TM2 domain containing 1	29	1	0	1	0	0	hsa-miR-148a-5p	-0.24	-0.24
PLAC8	ENST00000311507.4	placenta-specific 8	212	3	0	1	2	0	hsa-miR-148a-5p	-0.24	-0.41
PARD6G	ENST00000353265.3	par-6 family cell polarity regulator gamma	172	2	1	0	1	0	hsa-miR-148a-5p	-0.24	-0.24
RP11-865B13.1	ENST00000584361.1		5	1	0	0	1	0	hsa-miR-148a-5p	-0.24	-0.24
LECT1	ENST00000448904.2	leukocyte cell derived chemotaxin 1	5	1	0	1	0	0	hsa-miR-148a-5p	-0.24	-0.24
OFCC1	ENST00000316020.6	orofacial cleft 1 candidate 1	5	1	0	0	1	0	hsa-miR-148a-5p	-0.24	-0.24
FAM150A	ENST00000358543.4	family with sequence similarity 150, member A	32	1	0	1	0	0	hsa-miR-148a-5p	-0.24	-0.24
MAGEB16	ENST00000399988.1	melanoma antigen family B, 16	5	1	0	1	0	0	hsa-miR-148a-5p	-0.24	-0.24
ZNF37A	ENST00000361085.5	zinc finger protein 37A	11	3	2	0	1	2	hsa-miR-148a-5p	-0.24	-0.25
ANKRD34B	ENST00000338682.3	ankyrin repeat domain 34B	5	1	1	0	0	0	hsa-miR-148a-5p	-0.24	-0.24
ZNF674	ENST00000523374.1	zinc finger protein 674	7	1	1	0	0	0	hsa-miR-148a-5p	-0.24	-0.24
SUPT4H1	ENST00000225504.3	suppressor of Ty 4 homolog 1 (S. cerevisiae)	6325	1	0	1	0	0	hsa-miR-148a-5p	-0.24	-0.24
FKBP1A	ENST00000400137.4	FK506 binding protein 1A, 12kDa	72	1	0	1	0	0	hsa-miR-148a-5p	-0.24	-0.25
GRIN2B	ENST00000609686.1	glutamate receptor, ionotropic, N-methyl D-aspartate 2B	5	4	0	3	1	3	hsa-miR-148a-5p	-0.24	-0.24
IQCG	ENST00000265239.6	IQ motif containing G	22	1	1	0	0	0	hsa-miR-148a-5p	-0.24	-0.34
RER1	ENST00000378512.1	RER1 retention in endoplasmic reticulum 1 homolog (S. cerevisiae)	2954	1	1	0	0	0	hsa-miR-148a-5p	-0.24	-0.38
ZNF30	ENST00000601957.1	zinc finger protein 30	99	1	0	1	0	1	hsa-miR-148a-5p	-0.24	-0.24
FKBP1C	ENST00000370659.1	FK506 binding protein 1C	30	1	0	1	0	0	hsa-miR-148a-5p	-0.24	-0.24
RCN2	ENST00000394885.3	reticulocalbin 2, EF-hand calcium binding domain	4448	1	0	1	0	1	hsa-miR-148a-5p	-0.24	-0.24
CACUL1	ENST00000369151.3	CDK2-associated, cullin domain 1	213	5	0	5	0	2	hsa-miR-148a-5p	-0.24	-0.37
KMT2C	ENST00000262189.6	lysine (K)-specific methyltransferase 2C	417	1	0	1	0	1	hsa-miR-148a-5p	-0.24	-0.25
LHFPL5	ENST00000360215.1	lipoma HMGIC fusion partner-like 5	5	2	0	2	0	0	hsa-miR-148a-5p	-0.23	-0.23
HLA-G	ENST00000376828.2	major histocompatibility complex, class I, G	5	1	0	1	0	0	hsa-miR-148a-5p	-0.23	-0.23
DNA2	ENST00000399180.2	DNA replication helicase/nuclease 2	81	2	0	1	1	0	hsa-miR-148a-5p	-0.23	-0.31
NAT16	ENST00000300303.2	N-acetyltransferase 16 (GCN5-related, putative)	5	2	0	2	0	2	hsa-miR-148a-5p	-0.23	-0.23
ZNF225	ENST00000592780.1	zinc finger protein 225	100	1	1	0	0	0	hsa-miR-148a-5p	-0.23	-0.25
HLCS	ENST00000336648.4	holocarboxylase synthetase (biotin-(proprionyl-CoA-carboxylase (ATP-hydrolysing)) ligase)	688	2	1	0	1	1	hsa-miR-148a-5p	-0.23	-0.24
SACM1L	ENST00000389061.5	SAC1 suppressor of actin mutations 1-like (yeast)	159	1	1	0	0	0	hsa-miR-148a-5p	-0.23	-0.27
RBM24	ENST00000379052.5	RNA binding motif protein 24	43	1	0	1	0	2	hsa-miR-148a-5p	-0.23	-0.25
ZNF655	ENST00000425063.1	zinc finger protein 655	709	1	1	0	0	0	hsa-miR-148a-5p	-0.23	-0.24
FAM63B	ENST00000559228.1	family with sequence similarity 63, member B	41	2	1	1	0	0	hsa-miR-148a-5p	-0.23	-0.23
RARRES1	ENST00000237696.5	retinoic acid receptor responder (tazarotene induced) 1	73	1	0	1	0	0	hsa-miR-148a-5p	-0.23	-0.23
MEX3A	ENST00000532414.2	mex-3 RNA binding family member A	912	1	1	0	0	0	hsa-miR-148a-5p	-0.23	-0.29
TM4SF18	ENST00000296059.2	transmembrane 4 L six family member 18	5	1	1	0	0	1	hsa-miR-148a-5p	-0.23	-0.23
NFATC2IP	ENST00000320805.4	nuclear factor of activated T-cells, cytoplasmic, calcineurin-dependent 2 interacting protein	754	2	1	1	0	0	hsa-miR-148a-5p	-0.23	-0.23
OPN5	ENST00000489301.2	opsin 5	5	1	0	1	0	1	hsa-miR-148a-5p	-0.23	-0.23
HTN3	ENST00000530128.1	histatin 3	5	1	0	0	1	0	hsa-miR-148a-5p	-0.23	-0.23
ULBP3	ENST00000367339.2	UL16 binding protein 3	64	2	1	1	0	0	hsa-miR-148a-5p	-0.23	-0.38
HAUS1	ENST00000585518.1	HAUS augmin-like complex, subunit 1	99	1	0	0	1	0	hsa-miR-148a-5p	-0.23	-0.23
KLRC3	ENST00000381903.2	killer cell lectin-like receptor subfamily C, member 3	25	1	1	0	0	0	hsa-miR-148a-5p	-0.23	-0.29
IL26	ENST00000229134.4	interleukin 26	5	1	0	0	1	0	hsa-miR-148a-5p	-0.23	-0.23
OGN	ENST00000262551.4	osteoglycin	5	2	0	1	1	0	hsa-miR-148a-5p	-0.23	-0.23
CYP4V2	ENST00000378802.4	cytochrome P450, family 4, subfamily V, polypeptide 2	121	2	2	0	0	0	hsa-miR-148a-5p	-0.23	-0.26
FAM132B	ENST00000546354.1	family with sequence similarity 132, member B	722	1	1	0	0	0	hsa-miR-148a-5p	-0.23	-0.23
ZRANB1	ENST00000359653.4	zinc finger, RAN-binding domain containing 1	724	2	0	2	0	0	hsa-miR-148a-5p	-0.23	-0.23
FAM9A	ENST00000381003.3	family with sequence similarity 9, member A	5	1	0	1	0	0	hsa-miR-148a-5p	-0.22	-0.23
PSG3	ENST00000327495.5	pregnancy specific beta-1-glycoprotein 3	5	1	0	1	0	0	hsa-miR-148a-5p	-0.22	-0.23
CDCA4	ENST00000336219.3	cell division cycle associated 4	194	1	0	1	0	0	hsa-miR-148a-5p	-0.22	-0.22
FAM26D	ENST00000368597.2	family with sequence similarity 26, member D	5	1	0	1	0	0	hsa-miR-148a-5p	-0.22	-0.22
SIGLEC6	ENST00000346477.3	sialic acid binding Ig-like lectin 6	5	1	0	1	0	0	hsa-miR-148a-5p	-0.22	-0.22
CBWD7	ENST00000377391.3	COBW domain containing 7	5	1	0	1	0	0	hsa-miR-148a-5p	-0.22	-0.22
CDX4	ENST00000373514.2	caudal type homeobox 4	5	1	0	1	0	0	hsa-miR-148a-5p	-0.22	-0.22
ZNF616	ENST00000330123.5	zinc finger protein 616	45	2	1	1	0	0	hsa-miR-148a-5p	-0.22	-0.25
MMD	ENST00000262065.3	monocyte to macrophage differentiation-associated	558	1	1	0	0	0	hsa-miR-148a-5p	-0.22	-0.22
EID2	ENST00000390658.2	EP300 interacting inhibitor of differentiation 2	1085	1	0	1	0	0	hsa-miR-148a-5p	-0.22	-0.23
MEI4	ENST00000602452.2	meiosis-specific 4 homolog (S. cerevisiae)	5	4	0	3	1	0	hsa-miR-148a-5p	-0.22	-0.22
UGP2	ENST00000394417.2	UDP-glucose pyrophosphorylase 2	4271	1	0	1	0	0	hsa-miR-148a-5p	-0.22	-0.22
PPEF2	ENST00000286719.7	protein phosphatase, EF-hand calcium binding domain 2	5	1	1	0	0	0	hsa-miR-148a-5p	-0.22	-0.22
NCBP2	ENST00000447325.1	nuclear cap binding protein subunit 2, 20kDa	4301	2	0	1	1	0	hsa-miR-148a-5p	-0.22	-0.24
SMC5	ENST00000361138.5	structural maintenance of chromosomes 5	108	2	1	1	0	2	hsa-miR-148a-5p	-0.22	-0.25
AP1S3	ENST00000396654.2	adaptor-related protein complex 1, sigma 3 subunit	130	2	1	1	0	1	hsa-miR-148a-5p	-0.22	-0.44
ENOSF1	ENST00000383578.3	enolase superfamily member 1	95	2	0	1	1	0	hsa-miR-148a-5p	-0.22	-0.27
REEP1	ENST00000165698.5	receptor accessory protein 1	49	1	1	0	0	0	hsa-miR-148a-5p	-0.22	-0.22
RCSD1	ENST00000367854.3	RCSD domain containing 1	32	1	1	0	0	1	hsa-miR-148a-5p	-0.22	-0.23
VWA9	ENST00000313182.2	von Willebrand factor A domain containing 9	4511	2	0	2	0	0	hsa-miR-148a-5p	-0.22	-0.22
CASP3	ENST00000393585.2	caspase 3, apoptosis-related cysteine peptidase	43	1	1	0	0	0	hsa-miR-148a-5p	-0.22	-0.22
SUCNR1	ENST00000362032.5	succinate receptor 1	5	3	0	3	0	1	hsa-miR-148a-5p	-0.22	-0.22
SP7	ENST00000536324.2	Sp7 transcription factor	5	1	1	0	0	0	hsa-miR-148a-5p	-0.22	-0.22
TTC30B	ENST00000408939.3	tetratricopeptide repeat domain 30B	63	1	0	1	0	1	hsa-miR-148a-5p	-0.22	-0.22
UCP1	ENST00000262999.3	uncoupling protein 1 (mitochondrial, proton carrier)	14	1	0	1	0	0	hsa-miR-148a-5p	-0.22	-0.22
CCDC141	ENST00000420890.2	coiled-coil domain containing 141	5	1	1	0	0	0	hsa-miR-148a-5p	-0.22	-0.22
C16orf74	ENST00000602583.1	chromosome 16 open reading frame 74	1205	1	0	1	0	0	hsa-miR-148a-5p	-0.22	-0.22
KIF3A	ENST00000378746.4	kinesin family member 3A	33	2	0	1	1	0	hsa-miR-148a-5p	-0.22	-0.24
SLC11A2	ENST00000262051.7	solute carrier family 11 (proton-coupled divalent metal ion transporter), member 2	526	2	1	1	0	0	hsa-miR-148a-5p	-0.22	-0.45
AL161915.1	ENST00000391366.1	Uncharacterized protein	18	1	1	0	0	0	hsa-miR-148a-5p	-0.22	-0.22
COA3	ENST00000328434.7	cytochrome c oxidase assembly factor 3	576	1	0	1	0	0	hsa-miR-148a-5p	-0.22	-0.24
ESYT1	ENST00000394048.5	extended synaptotagmin-like protein 1	401	1	1	0	0	0	hsa-miR-148a-5p	-0.22	-0.23
PIGM	ENST00000368090.2	phosphatidylinositol glycan anchor biosynthesis, class M	179	2	1	1	0	2	hsa-miR-148a-5p	-0.22	-0.23
SRI	ENST00000265729.2	sorcin	278	1	0	1	0	2	hsa-miR-148a-5p	-0.22	-0.27
YES1	ENST00000577961.1	v-yes-1 Yamaguchi sarcoma viral oncogene homolog 1	168	2	0	2	0	0	hsa-miR-148a-5p	-0.21	-0.22
MPC2	ENST00000367846.4	mitochondrial pyruvate carrier 2	1594	1	0	0	1	0	hsa-miR-148a-5p	-0.21	-0.23
C1orf186	ENST00000331555.5	chromosome 1 open reading frame 186	5	1	0	1	0	0	hsa-miR-148a-5p	-0.21	-0.21
ASB5	ENST00000296525.3	ankyrin repeat and SOCS box containing 5	5	1	1	0	0	0	hsa-miR-148a-5p	-0.21	-0.21
TMEM154	ENST00000304385.3	transmembrane protein 154	5	4	2	2	0	4	hsa-miR-148a-5p	-0.21	-0.21
ZNF80	ENST00000482457.2	zinc finger protein 80	5	1	1	0	0	0	hsa-miR-148a-5p	-0.21	-0.21
TAPBP	ENST00000434618.2	TAP binding protein (tapasin)	1144	1	1	0	0	0	hsa-miR-148a-5p	-0.21	-0.21
TRIM34	ENST00000514226.1	tripartite motif containing 34	233	1	0	1	0	0	hsa-miR-148a-5p	-0.21	-0.21
MYC	ENST00000377970.2	v-myc avian myelocytomatosis viral oncogene homolog	22906	1	0	1	0	1	hsa-miR-148a-5p	-0.21	-0.21
ESF1	ENST00000202816.1	ESF1, nucleolar pre-rRNA processing protein, homolog (S. cerevisiae)	180	2	0	2	0	1	hsa-miR-148a-5p	-0.21	-0.31
ETF1	ENST00000499810.2	eukaryotic translation termination factor 1	31	1	1	0	0	0	hsa-miR-148a-5p	-0.21	-0.21
IL3RA	ENST00000331035.4	interleukin 3 receptor, alpha (low affinity)	5	1	0	1	0	0	hsa-miR-148a-5p	-0.21	-0.21
NTM	ENST00000374791.3	neurotrimin	231	1	1	0	0	0	hsa-miR-148a-5p	-0.21	-0.25
ZNF682	ENST00000397165.2	zinc finger protein 682	117	2	0	0	2	0	hsa-miR-148a-5p	-0.21	-0.22
CSRNP3	ENST00000314499.7	cysteine-serine-rich nuclear protein 3	24	3	1	1	1	1	hsa-miR-148a-5p	-0.21	-0.21
ART3	ENST00000341029.5	ADP-ribosyltransferase 3	24	1	0	1	0	0	hsa-miR-148a-5p	-0.21	-0.21
CHIC2	ENST00000263921.3	cysteine-rich hydrophobic domain 2	2509	3	1	1	1	0	hsa-miR-148a-5p	-0.21	-0.6
PSMA5	ENST00000271308.4	proteasome (prosome, macropain) subunit, alpha type, 5	60	3	1	2	0	1	hsa-miR-148a-5p	-0.21	-0.43
COL4A3BP	ENST00000380494.5	collagen, type IV, alpha 3 (Goodpasture antigen) binding protein	134	1	1	0	0	0	hsa-miR-148a-5p	-0.21	-0.24
CALD1	ENST00000361388.2	caldesmon 1	1013	1	1	0	0	0	hsa-miR-148a-5p	-0.21	-0.27
HORMAD1	ENST00000368995.4	HORMA domain containing 1	153	1	0	1	0	0	hsa-miR-148a-5p	-0.21	-0.21
RP11-664D7.4	ENST00000512294.3	HCG1787533; Uncharacterized protein	14	1	0	1	0	0	hsa-miR-148a-5p	-0.21	-0.21
CXorf30	ENST00000378657.4	chromosome X open reading frame 30	5	1	0	1	0	0	hsa-miR-148a-5p	-0.21	-0.21
SYNJ2	ENST00000449859.2	synaptojanin 2	369	1	1	0	0	1	hsa-miR-148a-5p	-0.21	-0.21
C10orf32	ENST00000339834.5	chromosome 10 open reading frame 32	642	1	0	1	0	0	hsa-miR-148a-5p	-0.21	-0.24
CLEC5A	ENST00000546910.1	C-type lectin domain family 5, member A	5	2	0	2	0	0	hsa-miR-148a-5p	-0.21	-0.21
EED	ENST00000327320.4	embryonic ectoderm development	142	1	0	0	1	1	hsa-miR-148a-5p	-0.21	-0.23
RNF2	ENST00000367510.3	ring finger protein 2	414	2	0	1	1	2	hsa-miR-148a-5p	-0.21	-0.25
HIST1H2BF	ENST00000359985.1	histone cluster 1, H2bf	16	1	0	1	0	0	hsa-miR-148a-5p	-0.21	-0.21
GEM	ENST00000396194.2	GTP binding protein overexpressed in skeletal muscle	40	1	0	1	0	0	hsa-miR-148a-5p	-0.21	-0.21
SMAD5	ENST00000545279.1	SMAD family member 5	225	3	0	3	0	0	hsa-miR-148a-5p	-0.21	-0.31
CBWD3	ENST00000360171.6	COBW domain containing 3	5	1	0	1	0	0	hsa-miR-148a-5p	-0.21	-0.21
CBWD6	ENST00000377457.5	COBW domain containing 6	5	1	0	1	0	0	hsa-miR-148a-5p	-0.21	-0.21
CBWD1	ENST00000356521.4	COBW domain containing 1	5	1	0	1	0	0	hsa-miR-148a-5p	-0.21	-0.21
NCKIPSD	ENST00000416649.2	NCK interacting protein with SH3 domain	4158	1	1	0	0	0	hsa-miR-148a-5p	-0.21	-0.21
HAVCR2	ENST00000307851.4	hepatitis A virus cellular receptor 2	5	2	0	0	2	0	hsa-miR-148a-5p	-0.21	-0.21
MAP3K15	ENST00000338883.4	mitogen-activated protein kinase kinase kinase 15	31	1	0	1	0	0	hsa-miR-148a-5p	-0.21	-0.21
ZNF736	ENST00000423484.2	zinc finger protein 736	36	2	1	0	1	0	hsa-miR-148a-5p	-0.21	-0.21
LMO2	ENST00000395833.3	LIM domain only 2 (rhombotin-like 1)	8	1	1	0	0	0	hsa-miR-148a-5p	-0.21	-0.21
GAS2L3	ENST00000547754.1	growth arrest-specific 2 like 3	478	3	2	1	0	1	hsa-miR-148a-5p	-0.21	-0.21
RBMXL1	ENST00000321792.5	RNA binding motif protein, X-linked-like 1	46	2	1	1	0	0	hsa-miR-148a-5p	-0.21	-0.23
LMO1	ENST00000335790.3	LIM domain only 1 (rhombotin 1)	238	1	0	1	0	0	hsa-miR-148a-5p	-0.2	-0.2
TCEB3B	ENST00000332567.4	transcription elongation factor B polypeptide 3B (elongin A2)	5	1	0	1	0	0	hsa-miR-148a-5p	-0.2	-0.2
C1S	ENST00000406697.1	complement component 1, s subcomponent	707	1	0	1	0	0	hsa-miR-148a-5p	-0.2	-0.2
KDM6A	ENST00000377967.4	lysine (K)-specific demethylase 6A	991	2	1	0	1	0	hsa-miR-148a-5p	-0.2	-0.42
VPS28	ENST00000529182.1	vacuolar protein sorting 28 homolog (S. cerevisiae)	495	1	0	1	0	0	hsa-miR-148a-5p	-0.2	-0.2
ASAH2	ENST00000395526.4	N-acylsphingosine amidohydrolase (non-lysosomal ceramidase) 2	5	3	1	0	2	1	hsa-miR-148a-5p	-0.2	-0.2
CBWD5	ENST00000382405.3	COBW domain containing 5	5	1	0	1	0	0	hsa-miR-148a-5p	-0.2	-0.2
FASTKD3	ENST00000264669.5	FAST kinase domains 3	252	1	0	1	0	0	hsa-miR-148a-5p	-0.2	-0.2
HIATL2	ENST00000602917.1	hippocampus abundant transcript-like 2	111	3	0	2	1	0	hsa-miR-148a-5p	-0.2	-0.21
RNFT1	ENST00000442346.2	ring finger protein, transmembrane 1	6	1	0	1	0	1	hsa-miR-148a-5p	-0.2	-0.2
FAM216B	ENST00000537894.1	family with sequence similarity 216, member B	5	1	1	0	0	0	hsa-miR-148a-5p	-0.2	-0.2
RP11-47I22.4	ENST00000556347.1		12	1	1	0	0	0	hsa-miR-148a-5p	-0.2	-0.35
SURF4	ENST00000545297.1	surfeit 4	3667	1	0	1	0	0	hsa-miR-148a-5p	-0.2	-0.2
ZNF239	ENST00000306006.6	zinc finger protein 239	125	1	0	1	0	0	hsa-miR-148a-5p	-0.2	-0.22
CDH3	ENST00000429102.2	cadherin 3, type 1, P-cadherin (placental)	21	1	0	1	0	0	hsa-miR-148a-5p	-0.2	-0.2
SPPL3	ENST00000353487.2	signal peptide peptidase like 3	799	2	0	2	0	0	hsa-miR-148a-5p	-0.2	-0.2
LCE2C	ENST00000368783.1	late cornified envelope 2C	5	1	0	1	0	0	hsa-miR-148a-5p	-0.2	-0.2
FAM73A	ENST00000370791.3	family with sequence similarity 73, member A	837	2	0	2	0	1	hsa-miR-148a-5p	-0.2	-0.2
GHITM	ENST00000372134.3	growth hormone inducible transmembrane protein	2402	2	1	0	1	0	hsa-miR-148a-5p	-0.2	-0.44
CHCHD1	ENST00000372837.3	coiled-coil-helix-coiled-coil-helix domain containing 1	97	1	0	1	0	1	hsa-miR-148a-5p	-0.2	-0.23
CHM	ENST00000357749.2	choroideremia (Rab escort protein 1)	217	2	1	1	0	0	hsa-miR-148a-5p	-0.2	-0.2
CRY1	ENST00000008527.5	cryptochrome 1 (photolyase-like)	336	1	0	1	0	1	hsa-miR-148a-5p	-0.2	-0.2
C8A	ENST00000361249.3	complement component 8, alpha polypeptide	5	2	1	1	0	0	hsa-miR-148a-5p	-0.2	-0.22
SH2D2A	ENST00000368198.3	SH2 domain containing 2A	21	1	0	1	0	0	hsa-miR-148a-5p	-0.2	-0.2
CLEC14A	ENST00000342213.2	C-type lectin domain family 14, member A	5	1	0	0	1	1	hsa-miR-148a-5p	-0.2	-0.2
CCL5	ENST00000293272.3	chemokine (C-C motif) ligand 5	5	1	0	0	1	0	hsa-miR-148a-5p	-0.2	-0.2
IL27	ENST00000356897.1	interleukin 27	5	1	0	1	0	0	hsa-miR-148a-5p	-0.2	-0.2
RP11-455G16.1	ENST00000326780.3	Uncharacterized protein	5	1	0	1	0	0	hsa-miR-148a-5p	-0.2	-0.2
C1orf167	ENST00000433342.1	chromosome 1 open reading frame 167	5	1	0	0	1	0	hsa-miR-148a-5p	-0.2	-0.2
PLCXD2	ENST00000477665.1	phosphatidylinositol-specific phospholipase C, X domain containing 2	5	2	0	2	0	0	hsa-miR-148a-5p	-0.2	-0.2
NKAIN2	ENST00000368417.1	Na+/K+ transporting ATPase interacting 2	34	1	0	1	0	1	hsa-miR-148a-5p	-0.2	-0.2
LMLN	ENST00000330198.4	leishmanolysin-like (metallopeptidase M8 family)	18	2	1	1	0	1	hsa-miR-148a-5p	-0.19	-0.23
PRKAG3	ENST00000439262.2	protein kinase, AMP-activated, gamma 3 non-catalytic subunit	5	1	0	0	1	1	hsa-miR-148a-5p	-0.19	-0.2
PPIC	ENST00000306442.4	peptidylprolyl isomerase C (cyclophilin C)	1030	1	0	0	1	1	hsa-miR-148a-5p	-0.19	-0.24
TEX9	ENST00000558083.2	testis expressed 9	10	1	0	1	0	4	hsa-miR-148a-5p	-0.19	-0.21
STK17A	ENST00000319357.5	serine/threonine kinase 17a	350	1	0	1	0	0	hsa-miR-148a-5p	-0.19	-0.19
RHPN2	ENST00000254260.3	rhophilin, Rho GTPase binding protein 2	5	1	0	1	0	0	hsa-miR-148a-5p	-0.19	-0.19
LAT2	ENST00000398475.1	linker for activation of T cells family, member 2	5	2	1	1	0	0	hsa-miR-148a-5p	-0.19	-0.19
TMEM155	ENST00000394396.1	transmembrane protein 155	5	1	0	1	0	0	hsa-miR-148a-5p	-0.19	-0.19
FANCD2	ENST00000383806.1	Fanconi anemia, complementation group D2	943	1	1	0	0	1	hsa-miR-148a-5p	-0.19	-0.21
CCNA1	ENST00000440264.1	cyclin A1	17	1	0	1	0	0	hsa-miR-148a-5p	-0.19	-0.19
RCBTB1	ENST00000258646.3	regulator of chromosome condensation (RCC1) and BTB (POZ) domain containing protein 1	9	2	0	2	0	4	hsa-miR-148a-5p	-0.19	-0.19
CD2AP	ENST00000359314.5	CD2-associated protein	145	2	0	1	1	1	hsa-miR-148a-5p	-0.19	-0.2
SNX19	ENST00000265909.4	sorting nexin 19	1157	2	1	1	0	1	hsa-miR-148a-5p	-0.19	-0.19
SPIN2A	ENST00000374908.1	spindlin family, member 2A	5	1	1	0	0	0	hsa-miR-148a-5p	-0.19	-0.19
GCG	ENST00000418842.2	glucagon	5	1	0	1	0	0	hsa-miR-148a-5p	-0.19	-0.19
NRAS	ENST00000369535.4	neuroblastoma RAS viral (v-ras) oncogene homolog	551	1	0	0	1	1	hsa-miR-148a-5p	-0.19	-0.2
CFH	ENST00000367429.4	complement factor H	82	1	0	1	0	0	hsa-miR-148a-5p	-0.19	-0.19
RDH14	ENST00000381249.3	retinol dehydrogenase 14 (all-trans/9-cis/11-cis)	535	1	0	1	0	0	hsa-miR-148a-5p	-0.19	-0.19
ORC3	ENST00000392844.3	origin recognition complex, subunit 3	702	1	0	0	1	0	hsa-miR-148a-5p	-0.19	-0.19
FAM199X	ENST00000493442.1	family with sequence similarity 199, X-linked	856	2	2	0	0	2	hsa-miR-148a-5p	-0.19	-0.28
C14orf39	ENST00000321731.3	chromosome 14 open reading frame 39	5	1	0	1	0	1	hsa-miR-148a-5p	-0.19	-0.19
HARS2	ENST00000435019.2	histidyl-tRNA synthetase 2, mitochondrial	150	1	0	0	1	0	hsa-miR-148a-5p	-0.19	-0.19
SOX11	ENST00000322002.3	SRY (sex determining region Y)-box 11	1100	3	1	1	1	1	hsa-miR-148a-5p	-0.19	-0.32
ZNF544	ENST00000599227.1	zinc finger protein 544	173	1	0	1	0	1	hsa-miR-148a-5p	-0.19	-0.19
TRIM6-TRIM34	ENST00000354852.5	TRIM6-TRIM34 readthrough	233	1	0	1	0	0	hsa-miR-148a-5p	-0.19	-0.19
SCLT1	ENST00000281142.5	sodium channel and clathrin linker 1	70	1	0	1	0	0	hsa-miR-148a-5p	-0.19	-0.19
ZNF772	ENST00000425074.3	zinc finger protein 772	22	1	0	1	0	0	hsa-miR-148a-5p	-0.19	-0.19
DSC1	ENST00000257197.3	desmocollin 1	7	1	1	0	0	1	hsa-miR-148a-5p	-0.19	-0.19
C5orf30	ENST00000319933.2	chromosome 5 open reading frame 30	889	1	0	1	0	1	hsa-miR-148a-5p	-0.19	-0.19
MAK16	ENST00000360128.6	MAK16 homolog (S. cerevisiae)	97	2	1	0	1	0	hsa-miR-148a-5p	-0.19	-0.25
TMSB4X	ENST00000451311.2	thymosin beta 4, X-linked	5	1	0	1	0	0	hsa-miR-148a-5p	-0.19	-0.19
C19orf77	ENST00000591708.1	chromosome 19 open reading frame 77	9	1	0	1	0	0	hsa-miR-148a-5p	-0.19	-0.19
RBP4	ENST00000371464.3	retinol binding protein 4, plasma	17402	1	0	1	0	0	hsa-miR-148a-5p	-0.19	-0.19
FAM160A2	ENST00000449352.2	family with sequence similarity 160, member A2	988	1	0	1	0	0	hsa-miR-148a-5p	-0.19	-0.19
CPE	ENST00000402744.4	carboxypeptidase E	282	1	0	1	0	4	hsa-miR-148a-5p	-0.19	-0.2
UBE2QL1	ENST00000399816.3	ubiquitin-conjugating enzyme E2Q family-like 1	10	3	0	2	1	1	hsa-miR-148a-5p	-0.19	-0.41
ATG3	ENST00000402314.2	autophagy related 3	177	1	0	1	0	0	hsa-miR-148a-5p	-0.19	-0.19
KIR2DL4	ENST00000359085.4	killer cell immunoglobulin-like receptor, two domains, long cytoplasmic tail, 4	5	1	0	1	0	0	hsa-miR-148a-5p	-0.19	-0.19
TUBD1	ENST00000346141.6	tubulin, delta 1	157	1	0	1	0	0	hsa-miR-148a-5p	-0.19	-0.19
SLC38A1	ENST00000398637.5	solute carrier family 38, member 1	1967	1	0	1	0	0	hsa-miR-148a-5p	-0.19	-0.19
P4HA1	ENST00000307116.2	prolyl 4-hydroxylase, alpha polypeptide I	38	1	0	1	0	0	hsa-miR-148a-5p	-0.19	-0.19
PDYN	ENST00000539905.1	prodynorphin	5	1	0	1	0	0	hsa-miR-148a-5p	-0.19	-0.19
MAGEA9B	ENST00000243314.5	melanoma antigen family A, 9B	5	1	0	0	1	1	hsa-miR-148a-5p	-0.19	-0.19
TMEM170A	ENST00000357613.4	transmembrane protein 170A	70	1	0	0	1	0	hsa-miR-148a-5p	-0.19	-0.19
SNX31	ENST00000311812.2	sorting nexin 31	5	1	0	1	0	0	hsa-miR-148a-5p	-0.19	-0.19
GPR137B	ENST00000366592.3	G protein-coupled receptor 137B	389	2	0	1	1	0	hsa-miR-148a-5p	-0.19	-0.2
POU1F1	ENST00000350375.2	POU class 1 homeobox 1	5	1	0	0	1	0	hsa-miR-148a-5p	-0.19	-0.19
BCL2L13	ENST00000418951.2	BCL2-like 13 (apoptosis facilitator)	741	2	1	1	0	0	hsa-miR-148a-5p	-0.19	-0.19
STMN3	ENST00000370053.1	stathmin-like 3	17	1	0	0	1	0	hsa-miR-148a-5p	-0.18	-0.18
NGLY1	ENST00000422724.2	N-glycanase 1	31	2	0	2	0	0	hsa-miR-148a-5p	-0.18	-0.18
RBM4B	ENST00000531036.2	RNA binding motif protein 4B	199	1	0	1	0	1	hsa-miR-148a-5p	-0.18	-0.18
ALAD	ENST00000409155.3	aminolevulinate dehydratase	1922	1	0	1	0	0	hsa-miR-148a-5p	-0.18	-0.18
C12orf73	ENST00000547975.1	chromosome 12 open reading frame 73	1060	1	0	0	1	0	hsa-miR-148a-5p	-0.18	-0.18
NAA11	ENST00000286794.4	N(alpha)-acetyltransferase 11, NatA catalytic subunit	66	1	0	1	0	1	hsa-miR-148a-5p	-0.18	-0.18
FAM9B	ENST00000362066.3	family with sequence similarity 9, member B	5	1	0	1	0	0	hsa-miR-148a-5p	-0.18	-0.18
CES4A	ENST00000540947.2	carboxylesterase 4A	30	1	0	1	0	1	hsa-miR-148a-5p	-0.18	-0.24
USP26	ENST00000370832.1	ubiquitin specific peptidase 26	5	1	0	0	1	1	hsa-miR-148a-5p	-0.18	-0.18
YIPF5	ENST00000274496.5	Yip1 domain family, member 5	594	1	0	1	0	0	hsa-miR-148a-5p	-0.18	-0.18
GDF9	ENST00000378673.2	growth differentiation factor 9	5	1	0	1	0	0	hsa-miR-148a-5p	-0.18	-0.18
SPTLC1	ENST00000262554.2	serine palmitoyltransferase, long chain base subunit 1	2578	1	0	1	0	0	hsa-miR-148a-5p	-0.18	-0.18
TPP1	ENST00000299427.6	tripeptidyl peptidase I	713	1	1	0	0	0	hsa-miR-148a-5p	-0.18	-0.22
PDCD6	ENST00000505221.1	programmed cell death 6	4780	1	0	0	1	0	hsa-miR-148a-5p	-0.18	-0.18
MS4A4A	ENST00000337908.4	membrane-spanning 4-domains, subfamily A, member 4A	5	1	0	1	0	0	hsa-miR-148a-5p	-0.18	-0.18
RFPL4B	ENST00000441065.2	ret finger protein-like 4B	93	1	0	1	0	0	hsa-miR-148a-5p	-0.18	-0.18
CARD14	ENST00000573882.1	caspase recruitment domain family, member 14	5	1	0	1	0	0	hsa-miR-148a-5p	-0.18	-0.18
PPP3R2	ENST00000374806.1	protein phosphatase 3, regulatory subunit B, beta	5	1	0	1	0	0	hsa-miR-148a-5p	-0.18	-0.18
NUCB2	ENST00000529010.1	nucleobindin 2	71	1	0	1	0	0	hsa-miR-148a-5p	-0.18	-0.18
ZNF117	ENST00000282869.6	zinc finger protein 117	21	2	1	0	1	0	hsa-miR-148a-5p	-0.18	-0.18
FAM122C	ENST00000370785.3	family with sequence similarity 122C	37	1	0	1	0	0	hsa-miR-148a-5p	-0.18	-0.18
CLASP2	ENST00000539981.1	cytoplasmic linker associated protein 2	554	2	0	0	2	0	hsa-miR-148a-5p	-0.18	-0.18
FSBP	ENST00000481490.2	fibrinogen silencer binding protein	36	3	1	2	0	0	hsa-miR-148a-5p	-0.18	-0.22
TAF1D	ENST00000448108.2	TATA box binding protein (TBP)-associated factor, RNA polymerase I, D, 41kDa	132	3	0	3	0	0	hsa-miR-148a-5p	-0.18	-0.2
BROX	ENST00000537020.1	BRO1 domain and CAAX motif containing	149	2	1	1	0	0	hsa-miR-148a-5p	-0.18	-0.2
DPYD	ENST00000370192.3	dihydropyrimidine dehydrogenase	160	1	0	1	0	1	hsa-miR-148a-5p	-0.18	-0.18
ATP2C1	ENST00000505330.1	ATPase, Ca++ transporting, type 2C, member 1	771	1	0	1	0	0	hsa-miR-148a-5p	-0.18	-0.18
ZCCHC6	ENST00000277141.6	zinc finger, CCHC domain containing 6	20	1	0	1	0	0	hsa-miR-148a-5p	-0.18	-0.18
SLIT3	ENST00000519560.1	slit homolog 3 (Drosophila)	13	2	0	2	0	3	hsa-miR-148a-5p	-0.18	-0.19
ZNF180	ENST00000391956.4	zinc finger protein 180	195	1	1	0	0	0	hsa-miR-148a-5p	-0.18	-0.28
SMIM21	ENST00000579022.1	small integral membrane protein 21	5	1	0	1	0	0	hsa-miR-148a-5p	-0.18	-0.18
C1orf168	ENST00000343433.6	chromosome 1 open reading frame 168	5	1	0	0	1	0	hsa-miR-148a-5p	-0.18	-0.18
STARD13	ENST00000336934.5	StAR-related lipid transfer (START) domain containing 13	314	2	0	2	0	0	hsa-miR-148a-5p	-0.18	-0.18
SLC22A15	ENST00000369503.4	solute carrier family 22, member 15	25	2	1	1	0	0	hsa-miR-148a-5p	-0.18	-0.18
CLDN10	ENST00000376873.3	claudin 10	7	1	1	0	0	0	hsa-miR-148a-5p	-0.18	-0.24
GUCY1A2	ENST00000526355.2	guanylate cyclase 1, soluble, alpha 2	24	1	1	0	0	1	hsa-miR-148a-5p	-0.18	-0.2
SPTY2D1	ENST00000336349.5	SPT2, Suppressor of Ty, domain containing 1 (S. cerevisiae)	241	3	1	2	0	0	hsa-miR-148a-5p	-0.18	-0.39
TAL1	ENST00000371884.2	T-cell acute lymphocytic leukemia 1	5	1	0	1	0	2	hsa-miR-148a-5p	-0.18	-0.18
ST3GAL3	ENST00000372377.4	ST3 beta-galactoside alpha-2,3-sialyltransferase 3	135	1	0	1	0	0	hsa-miR-148a-5p	-0.18	-0.18
EFCAB6	ENST00000356087.4	EF-hand calcium binding domain 6	23	3	0	1	2	0	hsa-miR-148a-5p	-0.18	-0.23
C14orf105	ENST00000216445.3	chromosome 14 open reading frame 105	5	1	0	1	0	0	hsa-miR-148a-5p	-0.18	-0.18
PSG1	ENST00000244296.2	pregnancy specific beta-1-glycoprotein 1	5	1	0	1	0	0	hsa-miR-148a-5p	-0.18	-0.18
DST	ENST00000312431.6	dystonin	439	3	2	1	0	2	hsa-miR-148a-5p	-0.18	-0.18
KIFC3	ENST00000465878.2	kinesin family member C3	65	1	0	1	0	0	hsa-miR-148a-5p	-0.18	-0.18
ZMPSTE24	ENST00000372759.3	zinc metallopeptidase STE24	513	1	1	0	0	0	hsa-miR-148a-5p	-0.18	-0.2
TPST2	ENST00000338754.4	tyrosylprotein sulfotransferase 2	1220	2	0	2	0	1	hsa-miR-148a-5p	-0.18	-0.2
FAM117B	ENST00000392238.2	family with sequence similarity 117, member B	245	3	0	3	0	2	hsa-miR-148a-5p	-0.18	-0.18
MEMO1	ENST00000295065.5	mediator of cell motility 1	89	4	0	2	2	0	hsa-miR-148a-5p	-0.18	-0.36
C4orf26	ENST00000311623.4	chromosome 4 open reading frame 26	5	1	0	1	0	0	hsa-miR-148a-5p	-0.18	-0.18
ATG16L1	ENST00000392017.4	autophagy related 16-like 1 (S. cerevisiae)	552	2	1	1	0	0	hsa-miR-148a-5p	-0.18	-0.18
CORO1C	ENST00000261401.3	coronin, actin binding protein, 1C	1970	2	0	2	0	4	hsa-miR-148a-5p	-0.18	-0.2
TCEB1	ENST00000518127.1	transcription elongation factor B (SIII), polypeptide 1 (15kDa, elongin C)	637	1	0	1	0	0	hsa-miR-148a-5p	-0.18	-0.26
BCL2L15	ENST00000393316.3	BCL2-like 15	5	2	0	0	2	2	hsa-miR-148a-5p	-0.18	-0.21
LLPH	ENST00000266604.2	LLP homolog, long-term synaptic facilitation (Aplysia)	88	1	0	0	1	1	hsa-miR-148a-5p	-0.17	-0.17
RWDD1	ENST00000466444.2	RWD domain containing 1	296	1	0	0	1	1	hsa-miR-148a-5p	-0.17	-0.17
FLRT3	ENST00000378053.3	fibronectin leucine rich transmembrane protein 3	11	1	0	1	0	0	hsa-miR-148a-5p	-0.17	-0.17
TRMT10C	ENST00000309922.6	tRNA methyltransferase 10 homolog C (S. cerevisiae)	655	2	0	2	0	0	hsa-miR-148a-5p	-0.17	-0.2
IMP3	ENST00000314852.2	IMP3, U3 small nucleolar ribonucleoprotein, homolog (yeast)	2164	1	0	1	0	0	hsa-miR-148a-5p	-0.17	-0.17
C1QTNF9B	ENST00000382145.1	C1q and tumor necrosis factor related protein 9B	5	1	0	0	1	0	hsa-miR-148a-5p	-0.17	-0.17
PDK4	ENST00000005178.5	pyruvate dehydrogenase kinase, isozyme 4	5549	1	1	0	0	1	hsa-miR-148a-5p	-0.17	-0.17
FAM122A	ENST00000394264.3	family with sequence similarity 122A	1277	1	0	1	0	3	hsa-miR-148a-5p	-0.17	-0.18
KCNE1L	ENST00000372101.2	KCNE1-like	9	1	0	0	1	1	hsa-miR-148a-5p	-0.17	-0.17
AL136115.1	ENST00000391369.1	HCG2032337; PRO1848; Uncharacterized protein	5	1	0	0	1	0	hsa-miR-148a-5p	-0.17	-0.17
GNAI3	ENST00000369851.4	guanine nucleotide binding protein (G protein), alpha inhibiting activity polypeptide 3	2439	1	0	1	0	1	hsa-miR-148a-5p	-0.17	-0.17
NANOS2	ENST00000341294.2	nanos homolog 2 (Drosophila)	5	1	0	1	0	0	hsa-miR-148a-5p	-0.17	-0.17
C6orf211	ENST00000367294.3	chromosome 6 open reading frame 211	65	1	0	0	1	0	hsa-miR-148a-5p	-0.17	-0.17
PMM1	ENST00000216259.7	phosphomannomutase 1	1753	1	0	1	0	0	hsa-miR-148a-5p	-0.17	-0.17
HLA-DRB1	ENST00000360004.5	major histocompatibility complex, class II, DR beta 1	28	1	0	1	0	0	hsa-miR-148a-5p	-0.17	-0.17
SLC47A2	ENST00000325411.5	solute carrier family 47 (multidrug and toxin extrusion), member 2	5	1	0	1	0	0	hsa-miR-148a-5p	-0.17	-0.17
C7orf41	ENST00000324453.8	chromosome 7 open reading frame 41	235	1	1	0	0	0	hsa-miR-148a-5p	-0.17	-0.2
CA12	ENST00000178638.3	carbonic anhydrase XII	42	2	1	1	0	0	hsa-miR-148a-5p	-0.17	-0.21
BPNT1	ENST00000322067.7	3'(2'), 5'-bisphosphate nucleotidase 1	201	1	1	0	0	0	hsa-miR-148a-5p	-0.17	-0.17
GPLD1	ENST00000230036.1	glycosylphosphatidylinositol specific phospholipase D1	51	4	0	1	3	1	hsa-miR-148a-5p	-0.17	-0.22
FOXR2	ENST00000339140.3	forkhead box R2	5	1	1	0	0	0	hsa-miR-148a-5p	-0.17	-0.17
FAM227B	ENST00000558594.1	family with sequence similarity 227, member B	44	1	0	0	1	0	hsa-miR-148a-5p	-0.17	-0.17
RDM1	ENST00000431884.2	RAD52 motif 1	37	1	0	0	1	0	hsa-miR-148a-5p	-0.17	-0.17
RP11-295D22.1	ENST00000565320.1	Uncharacterized protein	5	1	0	1	0	0	hsa-miR-148a-5p	-0.17	-0.17
TNF	ENST00000449264.2	tumor necrosis factor	5	1	0	1	0	0	hsa-miR-148a-5p	-0.17	-0.17
TMEM57	ENST00000399766.3	transmembrane protein 57	459	1	0	1	0	0	hsa-miR-148a-5p	-0.17	-0.17
VPS13B	ENST00000395996.1	vacuolar protein sorting 13 homolog B (yeast)	262	4	0	3	1	1	hsa-miR-148a-5p	-0.17	-0.17
HTR2A	ENST00000378688.4	5-hydroxytryptamine (serotonin) receptor 2A, G protein-coupled	5	2	0	1	1	0	hsa-miR-148a-5p	-0.17	-0.17
ANO6	ENST00000320560.8	anoctamin 6	2262	1	1	0	0	0	hsa-miR-148a-5p	-0.17	-0.17
ASCL4	ENST00000342331.4	achaete-scute complex homolog 4 (Drosophila)	5	1	0	1	0	0	hsa-miR-148a-5p	-0.17	-0.17
LCE2D	ENST00000368784.1	late cornified envelope 2D	5	1	0	1	0	0	hsa-miR-148a-5p	-0.17	-0.17
FAM217A	ENST00000274673.3	family with sequence similarity 217, member A	5	1	0	1	0	0	hsa-miR-148a-5p	-0.17	-0.17
LDLRAD3	ENST00000315571.5	low density lipoprotein receptor class A domain containing 3	90	2	0	2	0	0	hsa-miR-148a-5p	-0.17	-0.17
EXD2	ENST00000409018.3	exonuclease 3'-5' domain containing 2	3135	1	0	1	0	1	hsa-miR-148a-5p	-0.17	-0.25
GSTA1	ENST00000334575.5	glutathione S-transferase alpha 1	5	1	0	1	0	0	hsa-miR-148a-5p	-0.17	-0.17
IPO7	ENST00000379719.3	importin 7	1331	1	1	0	0	0	hsa-miR-148a-5p	-0.17	-0.17
TRMT13	ENST00000370141.2	tRNA methyltransferase 13 homolog (S. cerevisiae)	45	1	0	1	0	1	hsa-miR-148a-5p	-0.17	-0.17
HSDL1	ENST00000219439.4	hydroxysteroid dehydrogenase like 1	699	2	1	0	1	1	hsa-miR-148a-5p	-0.17	-0.19
TBCCD1	ENST00000424280.1	TBCC domain containing 1	707	2	0	1	1	0	hsa-miR-148a-5p	-0.17	-0.28
CALR	ENST00000316448.5	calreticulin	17017	1	0	1	0	0	hsa-miR-148a-5p	-0.17	-0.17
ERO1LB	ENST00000354619.5	ERO1-like beta (S. cerevisiae)	478	1	0	1	0	0	hsa-miR-148a-5p	-0.17	-0.18
MAN1A2	ENST00000356554.3	mannosidase, alpha, class 1A, member 2	603	1	1	0	0	2	hsa-miR-148a-5p	-0.17	-0.17
RAB30	ENST00000533486.1	RAB30, member RAS oncogene family	274	4	0	3	1	1	hsa-miR-148a-5p	-0.17	-0.18
FGF13	ENST00000315930.6	fibroblast growth factor 13	17	1	0	1	0	0	hsa-miR-148a-5p	-0.17	-0.17
TMEM74	ENST00000297459.3	transmembrane protein 74	5	1	0	1	0	0	hsa-miR-148a-5p	-0.17	-0.17
METAP1D	ENST00000315796.4	methionyl aminopeptidase type 1D (mitochondrial)	86	1	0	1	0	1	hsa-miR-148a-5p	-0.17	-0.17
JUN	ENST00000371222.2	jun proto-oncogene	7432	1	0	1	0	0	hsa-miR-148a-5p	-0.17	-0.17
ZNF197	ENST00000383745.2	zinc finger protein 197	53	1	0	1	0	0	hsa-miR-148a-5p	-0.16	-0.17
SYAP1	ENST00000380155.3	synapse associated protein 1	2689	1	1	0	0	1	hsa-miR-148a-5p	-0.16	-0.24
PPFIBP1	ENST00000318304.8	PTPRF interacting protein, binding protein 1 (liprin beta 1)	341	4	0	3	1	1	hsa-miR-148a-5p	-0.16	-0.24
MRC1L1	ENST00000331429.2	cDNA FLJ56855, highly similar to Macrophage mannose receptor 1	5	1	0	1	0	0	hsa-miR-148a-5p	-0.16	-0.16
SLC22A9	ENST00000310969.4	solute carrier family 22 (organic anion transporter), member 9	188	1	0	0	1	0	hsa-miR-148a-5p	-0.16	-0.16
PTEN	ENST00000371953.3	phosphatase and tensin homolog	118	2	1	1	0	1	hsa-miR-148a-5p	-0.16	-0.3
ATG4A	ENST00000372232.3	autophagy related 4A, cysteine peptidase	73	1	0	0	1	0	hsa-miR-148a-5p	-0.16	-0.16
PDE6A	ENST00000255266.5	phosphodiesterase 6A, cGMP-specific, rod, alpha	5	2	0	1	1	0	hsa-miR-148a-5p	-0.16	-0.16
GJB7	ENST00000525899.1	gap junction protein, beta 7, 25kDa	5	1	0	1	0	0	hsa-miR-148a-5p	-0.16	-0.16
POU4F1	ENST00000377208.5	POU class 4 homeobox 1	61	2	0	2	0	0	hsa-miR-148a-5p	-0.16	-0.16
C21orf54	ENST00000451980.2	chromosome 21 open reading frame 54	5	1	0	1	0	0	hsa-miR-148a-5p	-0.16	-0.16
GNPDA1	ENST00000311337.6	glucosamine-6-phosphate deaminase 1	1130	1	0	0	1	0	hsa-miR-148a-5p	-0.16	-0.16
SNAPC3	ENST00000380821.3	small nuclear RNA activating complex, polypeptide 3, 50kDa	2406	2	1	0	1	0	hsa-miR-148a-5p	-0.16	-0.23
C2CD2	ENST00000329623.7	C2 calcium-dependent domain containing 2	106	2	0	1	1	0	hsa-miR-148a-5p	-0.16	-0.2
ZNF638	ENST00000355812.3	zinc finger protein 638	15	1	0	0	1	1	hsa-miR-148a-5p	-0.16	-0.18
FH	ENST00000366560.3	fumarate hydratase	9	1	0	0	1	0	hsa-miR-148a-5p	-0.16	-0.16
INTS2	ENST00000444766.3	integrator complex subunit 2	109	1	0	1	0	0	hsa-miR-148a-5p	-0.16	-0.16
KCTD10	ENST00000228495.6	potassium channel tetramerization domain containing 10	147	2	0	2	0	0	hsa-miR-148a-5p	-0.16	-0.16
PDE6C	ENST00000371447.3	phosphodiesterase 6C, cGMP-specific, cone, alpha prime	5	1	0	1	0	0	hsa-miR-148a-5p	-0.16	-0.16
NUDT17	ENST00000334513.5	nudix (nucleoside diphosphate linked moiety X)-type motif 17	131	1	0	0	1	0	hsa-miR-148a-5p	-0.16	-0.16
RNF152	ENST00000312828.3	ring finger protein 152	57	2	1	1	0	1	hsa-miR-148a-5p	-0.16	-0.23
TMEM170B	ENST00000379426.1	transmembrane protein 170B	489	2	0	1	1	0	hsa-miR-148a-5p	-0.16	-0.18
ZNF233	ENST00000592581.1	zinc finger protein 233	6	1	0	1	0	1	hsa-miR-148a-5p	-0.16	-0.16
AC008964.1	ENST00000593965.1		5	1	0	1	0	0	hsa-miR-148a-5p	-0.16	-0.16
ASB15	ENST00000451558.1	ankyrin repeat and SOCS box containing 15	5	2	0	1	1	1	hsa-miR-148a-5p	-0.16	-0.18
FAM120AOS	ENST00000423591.1	family with sequence similarity 120A opposite strand	258	1	0	1	0	1	hsa-miR-148a-5p	-0.16	-0.24
CYTL1	ENST00000307746.4	cytokine-like 1	15	1	0	1	0	0	hsa-miR-148a-5p	-0.16	-0.16
EIF5AL1	ENST00000520547.2	eukaryotic translation initiation factor 5A-like 1	10	1	1	0	0	2	hsa-miR-148a-5p	-0.16	-0.36
CLLU1OS	ENST00000378487.2	chronic lymphocytic leukemia up-regulated 1 opposite strand	5	1	0	1	0	0	hsa-miR-148a-5p	-0.16	-0.16
ACO1	ENST00000309951.6	aconitase 1, soluble	738	2	0	2	0	0	hsa-miR-148a-5p	-0.16	-0.18
VGLL3	ENST00000398399.2	vestigial like 3 (Drosophila)	187	4	1	1	2	3	hsa-miR-148a-5p	-0.16	-0.17
SETD2	ENST00000409792.3	SET domain containing 2	196	1	0	1	0	1	hsa-miR-148a-5p	-0.16	-0.17
ACTG1	ENST00000331925.2	actin, gamma 1	3210	1	0	1	0	0	hsa-miR-148a-5p	-0.16	-0.16
IL13RA1	ENST00000371666.3	interleukin 13 receptor, alpha 1	494	2	0	1	1	1	hsa-miR-148a-5p	-0.16	-0.18
BCL2	ENST00000398117.1	B-cell CLL/lymphoma 2	55	2	0	0	2	2	hsa-miR-148a-5p	-0.16	-0.18
DARS	ENST00000264161.4	aspartyl-tRNA synthetase	361	1	0	0	1	1	hsa-miR-148a-5p	-0.16	-0.16
GALNT12	ENST00000375011.3	UDP-N-acetyl-alpha-D-galactosamine:polypeptide N-acetylgalactosaminyltransferase 12 (GalNAc-T12)	73	1	0	1	0	1	hsa-miR-148a-5p	-0.16	-0.16
AMFR	ENST00000290649.5	autocrine motility factor receptor, E3 ubiquitin protein ligase	1350	1	0	1	0	0	hsa-miR-148a-5p	-0.16	-0.16
F3	ENST00000334047.7	coagulation factor III (thromboplastin, tissue factor)	13568	1	0	1	0	0	hsa-miR-148a-5p	-0.16	-0.16
LINC00955	ENST00000514422.1	long intergenic non-protein coding RNA 955	5	1	0	0	1	0	hsa-miR-148a-5p	-0.16	-0.16
ITGA8	ENST00000378076.3	integrin, alpha 8	7	1	1	0	0	1	hsa-miR-148a-5p	-0.16	-0.16
FBXL3	ENST00000355619.5	F-box and leucine-rich repeat protein 3	842	3	1	2	0	0	hsa-miR-148a-5p	-0.16	-0.33
KIAA1430	ENST00000458385.2	KIAA1430	75	1	1	0	0	1	hsa-miR-148a-5p	-0.16	-0.17
C16orf80	ENST00000262498.3	chromosome 16 open reading frame 80	1562	1	0	0	1	0	hsa-miR-148a-5p	-0.16	-0.16
PAPOLA	ENST00000557471.1	poly(A) polymerase alpha	1229	2	1	1	0	1	hsa-miR-148a-5p	-0.16	-0.47
KIF16B	ENST00000354981.2	kinesin family member 16B	113	1	0	1	0	0	hsa-miR-148a-5p	-0.16	-0.16
NOS2	ENST00000313735.6	nitric oxide synthase 2, inducible	5	1	1	0	0	1	hsa-miR-148a-5p	-0.16	-0.16
CYTIP	ENST00000264192.3	cytohesin 1 interacting protein	8	1	0	1	0	1	hsa-miR-148a-5p	-0.16	-0.19
KDM4C	ENST00000381309.3	lysine (K)-specific demethylase 4C	160	1	0	1	0	0	hsa-miR-148a-5p	-0.16	-0.16
EIF4G3	ENST00000264211.8	eukaryotic translation initiation factor 4 gamma, 3	48	1	0	1	0	0	hsa-miR-148a-5p	-0.16	-0.16
LCE2B	ENST00000368780.3	late cornified envelope 2B	5	1	0	1	0	0	hsa-miR-148a-5p	-0.16	-0.16
PAAF1	ENST00000544552.1	proteasomal ATPase-associated factor 1	22	1	0	1	0	0	hsa-miR-148a-5p	-0.16	-0.21
INA	ENST00000369849.4	internexin neuronal intermediate filament protein, alpha	46	1	1	0	0	2	hsa-miR-148a-5p	-0.16	-0.17
ZNF793	ENST00000445217.1	zinc finger protein 793	22	1	0	1	0	1	hsa-miR-148a-5p	-0.15	-0.15
FAM19A4	ENST00000295569.7	family with sequence similarity 19 (chemokine (C-C motif)-like), member A4	5	1	0	1	0	1	hsa-miR-148a-5p	-0.15	-0.15
ERVMER34-1	ENST00000443173.1	endogenous retrovirus group MER34, member 1	28	1	0	1	0	0	hsa-miR-148a-5p	-0.15	-0.15
TIGIT	ENST00000486257.1	T cell immunoreceptor with Ig and ITIM domains	5	1	1	0	0	1	hsa-miR-148a-5p	-0.15	-0.15
TMEM156	ENST00000381938.3	transmembrane protein 156	15	2	0	1	1	0	hsa-miR-148a-5p	-0.15	-0.24
PM20D1	ENST00000367136.4	peptidase M20 domain containing 1	5	1	0	1	0	0	hsa-miR-148a-5p	-0.15	-0.15
EXOC1	ENST00000346134.7	exocyst complex component 1	565	1	0	0	1	0	hsa-miR-148a-5p	-0.15	-0.15
CHCHD3	ENST00000542753.1	coiled-coil-helix-coiled-coil-helix domain containing 3	63	1	0	1	0	0	hsa-miR-148a-5p	-0.15	-0.15
C10orf67	ENST00000323327.4	chromosome 10 open reading frame 67	5	1	1	0	0	0	hsa-miR-148a-5p	-0.15	-0.15
CCDC18	ENST00000334652.5	coiled-coil domain containing 18	35	1	0	0	1	0	hsa-miR-148a-5p	-0.15	-0.15
ASAH1	ENST00000262097.6	N-acylsphingosine amidohydrolase (acid ceramidase) 1	445	1	0	1	0	0	hsa-miR-148a-5p	-0.15	-0.18
C11orf34	ENST00000338832.2	chromosome 11 open reading frame 34	5	1	0	0	1	1	hsa-miR-148a-5p	-0.15	-0.15
C1orf123	ENST00000294360.4	chromosome 1 open reading frame 123	558	1	0	0	1	1	hsa-miR-148a-5p	-0.15	-0.24
LINC00999	ENST00000423687.1	long intergenic non-protein coding RNA 999	5	1	0	1	0	0	hsa-miR-148a-5p	-0.15	-0.15
ZNF777	ENST00000247930.4	zinc finger protein 777	122	1	0	1	0	0	hsa-miR-148a-5p	-0.15	-0.2
TMEM192	ENST00000306480.6	transmembrane protein 192	278	1	0	1	0	1	hsa-miR-148a-5p	-0.15	-0.16
IPO8	ENST00000256079.4	importin 8	228	2	1	0	1	1	hsa-miR-148a-5p	-0.15	-0.15
HPGD	ENST00000296522.6	hydroxyprostaglandin dehydrogenase 15-(NAD)	140	1	0	1	0	0	hsa-miR-148a-5p	-0.15	-0.19
LYSMD3	ENST00000509384.1	LysM, putative peptidoglycan-binding, domain containing 3	92	1	0	1	0	0	hsa-miR-148a-5p	-0.15	-0.16
NBEAL1	ENST00000449802.1	neurobeachin-like 1	42	3	0	1	2	0	hsa-miR-148a-5p	-0.15	-0.17
FPGS	ENST00000373245.1	folylpolyglutamate synthase	117	3	0	1	2	0	hsa-miR-148a-5p	-0.15	-0.2
IFNG	ENST00000229135.3	interferon, gamma	5	1	0	1	0	0	hsa-miR-148a-5p	-0.15	-0.15
MYO5C	ENST00000261839.7	myosin VC	39	2	0	2	0	0	hsa-miR-148a-5p	-0.15	-0.15
OLIG1	ENST00000382348.1	oligodendrocyte transcription factor 1	34	1	1	0	0	0	hsa-miR-148a-5p	-0.15	-0.15
CDK17	ENST00000543119.2	cyclin-dependent kinase 17	475	1	1	0	0	0	hsa-miR-148a-5p	-0.15	-0.16
TMF1	ENST00000398559.2	TATA element modulatory factor 1	349	1	0	0	1	1	hsa-miR-148a-5p	-0.15	-0.18
NAP1L6	ENST00000373518.1	nucleosome assembly protein 1-like 6	5	1	0	1	0	0	hsa-miR-148a-5p	-0.15	-0.15
PSG9	ENST00000244293.7	pregnancy specific beta-1-glycoprotein 9	5	1	0	1	0	0	hsa-miR-148a-5p	-0.15	-0.15
DCAF4L1	ENST00000333141.5	DDB1 and CUL4 associated factor 4-like 1	5	2	0	1	1	0	hsa-miR-148a-5p	-0.15	-0.15
KDELC2	ENST00000323468.5	KDEL (Lys-Asp-Glu-Leu) containing 2	667	1	0	1	0	0	hsa-miR-148a-5p	-0.15	-0.16
KIAA0391	ENST00000534898.4	KIAA0391	822	4	1	3	0	0	hsa-miR-148a-5p	-0.15	-0.26
ALDH9A1	ENST00000354775.4	aldehyde dehydrogenase 9 family, member A1	4094	1	0	1	0	1	hsa-miR-148a-5p	-0.15	-0.15
SLC25A21-AS1	ENST00000556667.1	SLC25A21 antisense RNA 1	50	1	0	0	1	1	hsa-miR-148a-5p	-0.15	-0.17
NSL1	ENST00000422588.2	NSL1, MIS12 kinetochore complex component	180	4	0	1	3	2	hsa-miR-148a-5p	-0.15	-0.28
ARID2	ENST00000457135.1	AT rich interactive domain 2 (ARID, RFX-like)	891	1	0	0	1	0	hsa-miR-148a-5p	-0.15	-0.15
SFXN4	ENST00000355697.2	sideroflexin 4	304	1	0	1	0	0	hsa-miR-148a-5p	-0.15	-0.15
ASAH2B	ENST00000374007.1	N-acylsphingosine amidohydrolase (non-lysosomal ceramidase) 2B	5	2	0	0	2	1	hsa-miR-148a-5p	-0.15	-0.22
PDCD7	ENST00000204549.4	programmed cell death 7	64	1	1	0	0	0	hsa-miR-148a-5p	-0.15	-0.15
TBX4	ENST00000393853.4	T-box 4	21	1	0	0	1	1	hsa-miR-148a-5p	-0.15	-0.15
BCAS2	ENST00000369541.3	breast carcinoma amplified sequence 2	159	1	0	1	0	3	hsa-miR-148a-5p	-0.15	-0.25
SDR42E1	ENST00000328945.5	short chain dehydrogenase/reductase family 42E, member 1	164	1	1	0	0	1	hsa-miR-148a-5p	-0.15	-0.23
WWC2	ENST00000403733.3	WW and C2 domain containing 2	717	4	0	2	2	0	hsa-miR-148a-5p	-0.15	-0.17
KDM3A	ENST00000409556.1	lysine (K)-specific demethylase 3A	2300	1	0	1	0	0	hsa-miR-148a-5p	-0.15	-0.15
HOXD13	ENST00000392539.3	homeobox D13	25	2	0	1	1	1	hsa-miR-148a-5p	-0.15	-0.16
PURA	ENST00000331327.3	purine-rich element binding protein A	367	1	0	1	0	0	hsa-miR-148a-5p	-0.15	-0.15
PPP1CB	ENST00000395366.2	protein phosphatase 1, catalytic subunit, beta isozyme	5795	1	1	0	0	0	hsa-miR-148a-5p	-0.15	-0.15
C19orf53	ENST00000593274.1	chromosome 19 open reading frame 53	634	1	0	1	0	0	hsa-miR-148a-5p	-0.15	-0.15
AL353791.1	ENST00000426179.1		5	1	0	1	0	0	hsa-miR-148a-5p	-0.15	-0.15
RPL23A	ENST00000422514.2	ribosomal protein L23a	13	1	0	1	0	0	hsa-miR-148a-5p	-0.15	-0.15
FAM19A2	ENST00000416284.3	family with sequence similarity 19 (chemokine (C-C motif)-like), member A2	26	1	0	1	0	1	hsa-miR-148a-5p	-0.15	-0.15
HTR1F	ENST00000319595.4	5-hydroxytryptamine (serotonin) receptor 1F, G protein-coupled	5	1	0	1	0	1	hsa-miR-148a-5p	-0.15	-0.15
PARP3	ENST00000431474.1	poly (ADP-ribose) polymerase family, member 3	5	1	0	0	1	0	hsa-miR-148a-5p	-0.15	-0.15
PXDNL	ENST00000543296.1	peroxidasin homolog (Drosophila)-like	5	1	0	1	0	0	hsa-miR-148a-5p	-0.15	-0.15
UCK2	ENST00000372212.4	uridine-cytidine kinase 2	437	2	0	2	0	2	hsa-miR-148a-5p	-0.15	-0.22
KITLG	ENST00000228280.5	KIT ligand	100	3	0	3	0	0	hsa-miR-148a-5p	-0.15	-0.15
UBE2N	ENST00000550657.1	ubiquitin-conjugating enzyme E2N	321	1	0	1	0	0	hsa-miR-148a-5p	-0.15	-0.15
CHRNA9	ENST00000310169.2	cholinergic receptor, nicotinic, alpha 9 (neuronal)	20	1	0	1	0	0	hsa-miR-148a-5p	-0.15	-0.15
FANCC	ENST00000289081.3	Fanconi anemia, complementation group C	408	2	1	1	0	1	hsa-miR-148a-5p	-0.15	-0.15
TTC9C	ENST00000316461.4	tetratricopeptide repeat domain 9C	475	1	0	0	1	0	hsa-miR-148a-5p	-0.15	-0.15
SHPK	ENST00000225519.3	sedoheptulokinase	40	1	1	0	0	0	hsa-miR-148a-5p	-0.15	-0.15
PHLDA2	ENST00000314222.4	pleckstrin homology-like domain, family A, member 2	755	1	0	1	0	0	hsa-miR-148a-5p	-0.15	-0.15
RASGEF1B	ENST00000509081.1	RasGEF domain family, member 1B	20	1	1	0	0	0	hsa-miR-148a-5p	-0.15	-0.15
WDR6	ENST00000395474.3	WD repeat domain 6	3435	1	0	1	0	1	hsa-miR-148a-5p	-0.15	-0.15
SLC7A7	ENST00000285850.7	solute carrier family 7 (amino acid transporter light chain, y+L system), member 7	27	1	0	0	1	0	hsa-miR-148a-5p	-0.15	-0.15
CNTN1	ENST00000551295.2	contactin 1	40	1	1	0	0	0	hsa-miR-148a-5p	-0.15	-0.15
CAMK2N1	ENST00000375078.3	calcium/calmodulin-dependent protein kinase II inhibitor 1	6631	1	0	1	0	0	hsa-miR-148a-5p	-0.15	-0.15
BSDC1	ENST00000341071.7	BSD domain containing 1	714	1	0	1	0	1	hsa-miR-148a-5p	-0.15	-0.15
TXNIP	ENST00000369317.4	thioredoxin interacting protein	11	1	0	0	1	1	hsa-miR-148a-5p	-0.14	-0.14
KHDRBS3	ENST00000355849.5	KH domain containing, RNA binding, signal transduction associated 3	11	1	0	0	1	0	hsa-miR-148a-5p	-0.14	-0.16
ITCH	ENST00000374864.4	itchy E3 ubiquitin protein ligase	769	1	1	0	0	1	hsa-miR-148a-5p	-0.14	-0.14
KRTAP9-7	ENST00000391354.1	keratin associated protein 9-7	5	1	0	0	1	1	hsa-miR-148a-5p	-0.14	-0.14
RAB11FIP2	ENST00000355624.3	RAB11 family interacting protein 2 (class I)	449	2	0	2	0	0	hsa-miR-148a-5p	-0.14	-0.16
RBM41	ENST00000372487.1	RNA binding motif protein 41	41	1	0	1	0	1	hsa-miR-148a-5p	-0.14	-0.15
FOXN3	ENST00000345097.4	forkhead box N3	42	2	0	0	2	0	hsa-miR-148a-5p	-0.14	-0.14
CREBZF	ENST00000398294.2	CREB/ATF bZIP transcription factor	1115	2	1	1	0	0	hsa-miR-148a-5p	-0.14	-0.34
ZHX1	ENST00000395571.3	zinc fingers and homeoboxes 1	88	2	0	1	1	0	hsa-miR-148a-5p	-0.14	-0.14
MED23	ENST00000368068.3	mediator complex subunit 23	1622	2	0	0	2	0	hsa-miR-148a-5p	-0.14	-0.14
DUSP11	ENST00000272444.3	dual specificity phosphatase 11 (RNA/RNP complex 1-interacting)	539	1	0	1	0	1	hsa-miR-148a-5p	-0.14	-0.2
NRBP2	ENST00000442628.2	nuclear receptor binding protein 2	1011	2	0	1	1	0	hsa-miR-148a-5p	-0.14	-0.14
IL33	ENST00000381434.3	interleukin 33	8	1	0	1	0	2	hsa-miR-148a-5p	-0.14	-0.14
IL31	ENST00000377035.1	interleukin 31	5	1	0	0	1	0	hsa-miR-148a-5p	-0.14	-0.14
ANGPTL1	ENST00000234816.2	angiopoietin-like 1	5	1	0	1	0	0	hsa-miR-148a-5p	-0.14	-0.14
LONRF1	ENST00000398246.3	LON peptidase N-terminal domain and ring finger 1	36	2	0	2	0	0	hsa-miR-148a-5p	-0.14	-0.14
RPL36A-HNRNPH2	ENST00000409170.3	RPL36A-HNRNPH2 readthrough	85	1	0	1	0	1	hsa-miR-148a-5p	-0.14	-0.15
COG3	ENST00000349995.5	component of oligomeric golgi complex 3	53	1	0	1	0	0	hsa-miR-148a-5p	-0.14	-0.14
BEST3	ENST00000488961.1	bestrophin 3	5	1	0	1	0	0	hsa-miR-148a-5p	-0.14	-0.14
AC024257.1	ENST00000598930.1	CDNA FLJ26186 fis, clone ADG04757; Uncharacterized protein	5	1	0	1	0	1	hsa-miR-148a-5p	-0.14	-0.14
NABP1	ENST00000410026.2	nucleic acid binding protein 1	938	5	1	4	0	2	hsa-miR-148a-5p	-0.14	-0.36
LSM14A	ENST00000433627.5	LSM14A, SCD6 homolog A (S. cerevisiae)	362	2	0	2	0	0	hsa-miR-148a-5p	-0.14	-0.26
FUT10	ENST00000327671.5	fucosyltransferase 10 (alpha (1,3) fucosyltransferase)	124	4	1	3	0	0	hsa-miR-148a-5p	-0.14	-0.33
OLR1	ENST00000543993.1	oxidized low density lipoprotein (lectin-like) receptor 1	15	2	0	2	0	0	hsa-miR-148a-5p	-0.14	-0.22
AKR1B10	ENST00000359579.4	aldo-keto reductase family 1, member B10 (aldose reductase)	5	1	0	0	1	0	hsa-miR-148a-5p	-0.14	-0.14
CAAP1	ENST00000520187.1	caspase activity and apoptosis inhibitor 1	1527	1	0	1	0	0	hsa-miR-148a-5p	-0.14	-0.14
KLF9	ENST00000377126.2	Kruppel-like factor 9	20	1	0	1	0	0	hsa-miR-148a-5p	-0.14	-0.14
UPF3A	ENST00000375299.3	UPF3 regulator of nonsense transcripts homolog A (yeast)	44	1	1	0	0	0	hsa-miR-148a-5p	-0.14	-0.14
PLS3	ENST00000420625.2	plastin 3	8789	1	1	0	0	0	hsa-miR-148a-5p	-0.14	-0.14
PRPF38B	ENST00000370025.4	pre-mRNA processing factor 38B	724	2	0	1	1	1	hsa-miR-148a-5p	-0.14	-0.26
UBE2W	ENST00000517608.1	ubiquitin-conjugating enzyme E2W (putative)	102	2	0	1	1	4	hsa-miR-148a-5p	-0.14	-0.21
CIR1	ENST00000362053.5	corepressor interacting with RBPJ, 1	310	1	0	1	0	0	hsa-miR-148a-5p	-0.14	-0.14
USP6	ENST00000332776.4	ubiquitin specific peptidase 6 (Tre-2 oncogene)	5	3	0	3	0	2	hsa-miR-148a-5p	-0.14	-0.14
RNF149	ENST00000295317.3	ring finger protein 149	318	2	0	2	0	0	hsa-miR-148a-5p	-0.14	-0.18
HIGD1A	ENST00000321331.7	HIG1 hypoxia inducible domain family, member 1A	254	1	0	0	1	1	hsa-miR-148a-5p	-0.14	-0.15
CASS4	ENST00000371336.3	Cas scaffolding protein family member 4	49	2	1	0	1	0	hsa-miR-148a-5p	-0.14	-0.16
UBE2E3	ENST00000410062.4	ubiquitin-conjugating enzyme E2E 3	15	1	0	1	0	0	hsa-miR-148a-5p	-0.14	-0.14
PRRG1	ENST00000378628.4	proline rich Gla (G-carboxyglutamic acid) 1	1122	1	0	1	0	0	hsa-miR-148a-5p	-0.14	-0.14
TJP1	ENST00000346128.6	tight junction protein 1	140	1	0	0	1	1	hsa-miR-148a-5p	-0.14	-0.14
TC2N	ENST00000435962.2	tandem C2 domains, nuclear	604	1	0	1	0	0	hsa-miR-148a-5p	-0.14	-0.14
CCDC6	ENST00000263102.6	coiled-coil domain containing 6	193	4	0	2	2	2	hsa-miR-148a-5p	-0.14	-0.28
OCSTAMP	ENST00000279028.2	osteoclast stimulatory transmembrane protein	5	1	0	0	1	0	hsa-miR-148a-5p	-0.14	-0.14
LRRC38	ENST00000376085.3	leucine rich repeat containing 38	5	1	0	1	0	0	hsa-miR-148a-5p	-0.14	-0.14
PDE7A	ENST00000401827.3	phosphodiesterase 7A	84	1	1	0	0	0	hsa-miR-148a-5p	-0.14	-0.14
ZNF41	ENST00000313116.7	zinc finger protein 41	86	1	0	1	0	1	hsa-miR-148a-5p	-0.14	-0.14
ZNF514	ENST00000295208.2	zinc finger protein 514	32	1	0	0	1	0	hsa-miR-148a-5p	-0.14	-0.14
PTGS1	ENST00000362012.2	prostaglandin-endoperoxide synthase 1 (prostaglandin G/H synthase and cyclooxygenase)	399	1	0	1	0	0	hsa-miR-148a-5p	-0.14	-0.14
GUCY2C	ENST00000261170.3	guanylate cyclase 2C (heat stable enterotoxin receptor)	5	1	0	1	0	0	hsa-miR-148a-5p	-0.14	-0.14
CCDC39	ENST00000273654.4	coiled-coil domain containing 39	5	1	0	1	0	0	hsa-miR-148a-5p	-0.14	-0.14
ORC2	ENST00000234296.2	origin recognition complex, subunit 2	381	1	0	1	0	0	hsa-miR-148a-5p	-0.14	-0.14
TNKS2	ENST00000371627.4	tankyrase, TRF1-interacting ankyrin-related ADP-ribose polymerase 2	205	1	1	0	0	0	hsa-miR-148a-5p	-0.14	-0.18
MATR3	ENST00000510056.1	matrin 3	216	1	1	0	0	0	hsa-miR-148a-5p	-0.14	-0.14
KIAA0754	ENST00000530275.1	KIAA0754	5	1	0	1	0	0	hsa-miR-148a-5p	-0.14	-0.14
TRIAP1	ENST00000546954.1	TP53 regulated inhibitor of apoptosis 1	2541	1	0	0	1	0	hsa-miR-148a-5p	-0.14	-0.14
RBAK	ENST00000396912.1	RB-associated KRAB zinc finger	99	2	1	1	0	0	hsa-miR-148a-5p	-0.14	-0.2
C21orf62	ENST00000536776.1	chromosome 21 open reading frame 62	5	1	1	0	0	1	hsa-miR-148a-5p	-0.14	-0.14
DKFZP667F0711	ENST00000391437.1		5	1	0	1	0	0	hsa-miR-148a-5p	-0.14	-0.14
AADAT	ENST00000337664.4	aminoadipate aminotransferase	49	1	0	1	0	0	hsa-miR-148a-5p	-0.14	-0.15
ADAMTS18	ENST00000282849.5	ADAM metallopeptidase with thrombospondin type 1 motif, 18	7	1	0	1	0	2	hsa-miR-148a-5p	-0.14	-0.14
ZNF280C	ENST00000370978.4	zinc finger protein 280C	138	1	1	0	0	0	hsa-miR-148a-5p	-0.14	-0.14
CD58	ENST00000369487.3	CD58 molecule	121	1	0	1	0	0	hsa-miR-148a-5p	-0.14	-0.17
ZNF550	ENST00000325134.5	zinc finger protein 550	76	1	0	0	1	1	hsa-miR-148a-5p	-0.14	-0.15
FUNDC2	ENST00000369498.3	FUN14 domain containing 2	130	2	1	1	0	1	hsa-miR-148a-5p	-0.14	-0.4
GPR89C	ENST00000447947.2	G protein-coupled receptor 89C	5	1	0	0	1	0	hsa-miR-148a-5p	-0.14	-0.14
CLIC4	ENST00000374379.4	chloride intracellular channel 4	226	1	0	1	0	2	hsa-miR-148a-5p	-0.14	-0.14
NKX6-1	ENST00000515820.2	NK6 homeobox 1	9	1	0	0	1	0	hsa-miR-148a-5p	-0.14	-0.14
ENAH	ENST00000366844.3	enabled homolog (Drosophila)	415	1	1	0	0	0	hsa-miR-148a-5p	-0.14	-0.14
LRRC15	ENST00000347624.3	leucine rich repeat containing 15	12	3	0	3	0	1	hsa-miR-148a-5p	-0.14	-0.14
TMEM242	ENST00000400788.4	transmembrane protein 242	593	3	1	2	0	0	hsa-miR-148a-5p	-0.13	-0.51
PPARGC1A	ENST00000264867.2	peroxisome proliferator-activated receptor gamma, coactivator 1 alpha	19	4	0	3	1	1	hsa-miR-148a-5p	-0.13	-0.15
ZCCHC24	ENST00000372336.3	zinc finger, CCHC domain containing 24	359	2	0	2	0	1	hsa-miR-148a-5p	-0.13	-0.13
PGBD2	ENST00000355360.4	piggyBac transposable element derived 2	65	1	0	0	1	0	hsa-miR-148a-5p	-0.13	-0.17
PRIMA1	ENST00000393140.1	proline rich membrane anchor 1	5	1	0	1	0	0	hsa-miR-148a-5p	-0.13	-0.13
CST3	ENST00000398411.1	cystatin C	11	2*	0	1	0	1	hsa-miR-148a-5p	-0.13	-0.13
DHX32	ENST00000368721.1	DEAH (Asp-Glu-Ala-His) box polypeptide 32	268	1	0	0	1	0	hsa-miR-148a-5p	-0.13	-0.14
GINM1	ENST00000367419.5	glycoprotein integral membrane 1	428	1	1	0	0	0	hsa-miR-148a-5p	-0.13	-0.39
APOL3	ENST00000397293.2	apolipoprotein L, 3	5	1	0	1	0	1	hsa-miR-148a-5p	-0.13	-0.14
RAP2C	ENST00000342983.2	RAP2C, member of RAS oncogene family	604	1	0	1	0	0	hsa-miR-148a-5p	-0.13	-0.13
USP48	ENST00000400301.1	ubiquitin specific peptidase 48	3036	2	0	1	1	0	hsa-miR-148a-5p	-0.13	-0.27
ANKHD1	ENST00000360839.2	ankyrin repeat and KH domain containing 1	247	1	0	0	1	0	hsa-miR-148a-5p	-0.13	-0.13
JAG1	ENST00000254958.5	jagged 1	421	1	0	1	0	1	hsa-miR-148a-5p	-0.13	-0.13
KIF3B	ENST00000375712.3	kinesin family member 3B	182	3	0	3	0	0	hsa-miR-148a-5p	-0.13	-0.13
GCNT3	ENST00000396065.1	glucosaminyl (N-acetyl) transferase 3, mucin type	54	2	0	2	0	0	hsa-miR-148a-5p	-0.13	-0.13
CMTM5	ENST00000359320.3	CKLF-like MARVEL transmembrane domain containing 5	5	1	0	0	1	0	hsa-miR-148a-5p	-0.13	-0.13
COX15	ENST00000016171.5	cytochrome c oxidase assembly homolog 15 (yeast)	984	1	0	1	0	1	hsa-miR-148a-5p	-0.13	-0.13
UNKL	ENST00000389221.4	unkempt homolog (Drosophila)-like	308	1	0	0	1	0	hsa-miR-148a-5p	-0.13	-0.14
REEP3	ENST00000373758.4	receptor accessory protein 3	1095	2	0	1	1	2	hsa-miR-148a-5p	-0.13	-0.17
TSC22D2	ENST00000361875.3	TSC22 domain family, member 2	1062	2	0	2	0	0	hsa-miR-148a-5p	-0.13	-0.15
RAD51L3-RFFL	ENST00000593039.1	Uncharacterized protein	670	3	0	3	0	1	hsa-miR-148a-5p	-0.13	-0.19
IKBKAP	ENST00000374647.5	inhibitor of kappa light polypeptide gene enhancer in B-cells, kinase complex-associated protein	608	1	0	1	0	0	hsa-miR-148a-5p	-0.13	-0.13
AKAP10	ENST00000225737.6	A kinase (PRKA) anchor protein 10	700	1	0	1	0	0	hsa-miR-148a-5p	-0.13	-0.13
SCRG1	ENST00000296506.3	stimulator of chondrogenesis 1	5	1	0	1	0	2	hsa-miR-148a-5p	-0.13	-0.13
OR2C3	ENST00000366487.3	olfactory receptor, family 2, subfamily C, member 3	5	1	0	1	0	0	hsa-miR-148a-5p	-0.13	-0.13
C9orf170	ENST00000375941.2	chromosome 9 open reading frame 170	5	1	0	0	1	1	hsa-miR-148a-5p	-0.13	-0.13
OTX1	ENST00000366671.3	orthodenticle homeobox 1	11	1	0	1	0	0	hsa-miR-148a-5p	-0.13	-0.13
ADAM12	ENST00000368679.4	ADAM metallopeptidase domain 12	758	2	0	2	0	1	hsa-miR-148a-5p	-0.13	-0.13
VPRBP	ENST00000335891.5	Vpr (HIV-1) binding protein	102	2	0	0	2	0	hsa-miR-148a-5p	-0.13	-0.14
TMEM123	ENST00000361236.3	transmembrane protein 123	2135	2	0	2	0	0	hsa-miR-148a-5p	-0.13	-0.13
HYKK	ENST00000408962.2	hydroxylysine kinase	169	1	0	1	0	0	hsa-miR-148a-5p	-0.13	-0.22
ARL13A	ENST00000450049.2	ADP-ribosylation factor-like 13A	9	1	0	1	0	0	hsa-miR-148a-5p	-0.13	-0.31
RNF38	ENST00000259605.6	ring finger protein 38	348	1	0	0	1	0	hsa-miR-148a-5p	-0.13	-0.13
EIF1AY	ENST00000361365.2	eukaryotic translation initiation factor 1A, Y-linked	5	1	0	0	1	0	hsa-miR-148a-5p	-0.13	-0.13
PKD2L2	ENST00000508638.1	polycystic kidney disease 2-like 2	5	1	0	1	0	0	hsa-miR-148a-5p	-0.13	-0.13
OSBPL11	ENST00000296220.5	oxysterol binding protein-like 11	101	1	0	0	1	0	hsa-miR-148a-5p	-0.13	-0.13
MTM1	ENST00000542741.1	myotubularin 1	68	1	0	1	0	0	hsa-miR-148a-5p	-0.13	-0.13
ARMC1	ENST00000276569.3	armadillo repeat containing 1	93	1	0	1	0	0	hsa-miR-148a-5p	-0.13	-0.14
PACSIN2	ENST00000263246.3	protein kinase C and casein kinase substrate in neurons 2	402	1	1	0	0	0	hsa-miR-148a-5p	-0.13	-0.15
GALNT15	ENST00000339732.5	UDP-N-acetyl-alpha-D-galactosamine:polypeptide N-acetylgalactosaminyltransferase 15	114	4*	1	1	1	1	hsa-miR-148a-5p	-0.13	-0.35
FAM110C	ENST00000327669.4	family with sequence similarity 110, member C	29	1	0	1	0	1	hsa-miR-148a-5p	-0.13	-0.13
FST	ENST00000396947.3	follistatin	53	1	0	1	0	0	hsa-miR-148a-5p	-0.13	-0.13
CCDC14	ENST00000488653.2	coiled-coil domain containing 14	275	1	0	1	0	0	hsa-miR-148a-5p	-0.13	-0.13
C4orf45	ENST00000434826.2	chromosome 4 open reading frame 45	5	1	0	1	0	0	hsa-miR-148a-5p	-0.13	-0.13
KCNH7	ENST00000332142.5	potassium voltage-gated channel, subfamily H (eag-related), member 7	5	1	0	1	0	0	hsa-miR-148a-5p	-0.13	-0.13
ANGPTL6	ENST00000589181.1	angiopoietin-like 6	5	1	0	1	0	0	hsa-miR-148a-5p	-0.13	-0.13
HNF4G	ENST00000396423.2	hepatocyte nuclear factor 4, gamma	5	1	0	0	1	2	hsa-miR-148a-5p	-0.13	-0.13
SH2D4B	ENST00000339284.2	SH2 domain containing 4B	5	2	0	1	1	0	hsa-miR-148a-5p	-0.13	-0.13
IRX2	ENST00000382611.6	iroquois homeobox 2	5	1	0	1	0	0	hsa-miR-148a-5p	-0.13	-0.13
GIPC2	ENST00000370759.3	GIPC PDZ domain containing family, member 2	16	1	0	1	0	0	hsa-miR-148a-5p	-0.13	-0.21
FAM120C	ENST00000477084.1	family with sequence similarity 120C	11	1	1	0	0	0	hsa-miR-148a-5p	-0.13	-0.33
ARID1A	ENST00000324856.7	AT rich interactive domain 1A (SWI-like)	31	1	1	0	0	0	hsa-miR-148a-5p	-0.13	-0.13
ATE1	ENST00000369043.3	arginyltransferase 1	237	2	0	1	1	0	hsa-miR-148a-5p	-0.13	-0.13
LRRTM3	ENST00000361320.4	leucine rich repeat transmembrane neuronal 3	5	3	0	2	1	0	hsa-miR-148a-5p	-0.13	-0.15
MRPS27	ENST00000261413.5	mitochondrial ribosomal protein S27	1137	1	0	1	0	0	hsa-miR-148a-5p	-0.13	-0.13
CCNC	ENST00000520371.1	cyclin C	524	1	0	0	1	0	hsa-miR-148a-5p	-0.13	-0.13
ONECUT1	ENST00000560699.2	one cut homeobox 1	10	1	1	0	0	1	hsa-miR-148a-5p	-0.13	-0.28
RRN3	ENST00000198767.6	RRN3 RNA polymerase I transcription factor homolog (S. cerevisiae)	470	2	0	1	1	2	hsa-miR-148a-5p	-0.13	-0.15
SLC4A4	ENST00000340595.3	solute carrier family 4 (sodium bicarbonate cotransporter), member 4	400	3	0	1	2	0	hsa-miR-148a-5p	-0.13	-0.13
TYK2	ENST00000524462.1	tyrosine kinase 2	301	1	0	0	1	0	hsa-miR-148a-5p	-0.13	-0.13
C17orf104	ENST00000409122.2	chromosome 17 open reading frame 104	5	1	0	1	0	1	hsa-miR-148a-5p	-0.13	-0.13
CD300E	ENST00000392619.1	CD300e molecule	5	1	0	0	1	1	hsa-miR-148a-5p	-0.13	-0.13
PSME1	ENST00000382708.3	proteasome (prosome, macropain) activator subunit 1 (PA28 alpha)	1179	1	0	1	0	0	hsa-miR-148a-5p	-0.13	-0.13
SPATA3	ENST00000452881.1	spermatogenesis associated 3	5	1	0	1	0	0	hsa-miR-148a-5p	-0.13	-0.13
RFESD	ENST00000513950.2	Rieske (Fe-S) domain containing	15	1	0	1	0	2	hsa-miR-148a-5p	-0.13	-0.26
FGFR1OP2	ENST00000546072.1	FGFR1 oncogene partner 2	104	1	0	1	0	0	hsa-miR-148a-5p	-0.13	-0.18
RORA	ENST00000335670.6	RAR-related orphan receptor A	102	4	1	2	1	2	hsa-miR-148a-5p	-0.13	-0.15
FBXL13	ENST00000393772.2	F-box and leucine-rich repeat protein 13	31	2	0	1	1	0	hsa-miR-148a-5p	-0.13	-0.17
VPS37D	ENST00000451519.1	vacuolar protein sorting 37 homolog D (S. cerevisiae)	173	1	0	1	0	0	hsa-miR-148a-5p	-0.12	-0.12
ZNF112	ENST00000354340.4	zinc finger protein 112	20	1	0	1	0	0	hsa-miR-148a-5p	-0.12	-0.12
ELTD1	ENST00000370742.3	EGF, latrophilin and seven transmembrane domain containing 1	13	1	0	0	1	0	hsa-miR-148a-5p	-0.12	-0.12
ADH4	ENST00000508393.1	alcohol dehydrogenase 4 (class II), pi polypeptide	5	1	0	0	1	0	hsa-miR-148a-5p	-0.12	-0.12
NAALADL2	ENST00000454872.1	N-acetylated alpha-linked acidic dipeptidase-like 2	5	1	1	0	0	0	hsa-miR-148a-5p	-0.12	-0.12
ABCD3	ENST00000394233.2	ATP-binding cassette, sub-family D (ALD), member 3	53	1	0	1	0	1	hsa-miR-148a-5p	-0.12	-0.16
RNF41	ENST00000345093.4	ring finger protein 41	152	3	1	1	1	0	hsa-miR-148a-5p	-0.12	-0.31
SNAPC5	ENST00000566658.1	small nuclear RNA activating complex, polypeptide 5, 19kDa	211	1	1	0	0	0	hsa-miR-148a-5p	-0.12	-0.3
ASB12	ENST00000362002.2	ankyrin repeat and SOCS box containing 12	5	1	0	0	1	0	hsa-miR-148a-5p	-0.12	-0.12
TRIM32	ENST00000373983.2	tripartite motif containing 32	285	1	0	1	0	0	hsa-miR-148a-5p	-0.12	-0.12
LYSMD4	ENST00000409796.1	LysM, putative peptidoglycan-binding, domain containing 4	1344	1	0	1	0	0	hsa-miR-148a-5p	-0.12	-0.12
C1QTNF6	ENST00000337843.2	C1q and tumor necrosis factor related protein 6	30	1	0	1	0	1	hsa-miR-148a-5p	-0.12	-0.12
IL23R	ENST00000371002.1	interleukin 23 receptor	5	1	0	0	1	1	hsa-miR-148a-5p	-0.12	-0.12
CLASP1	ENST00000409078.3	cytoplasmic linker associated protein 1	210	1	0	1	0	1	hsa-miR-148a-5p	-0.12	-0.14
ABCA9	ENST00000370732.2	ATP-binding cassette, sub-family A (ABC1), member 9	5	1	1	0	0	1	hsa-miR-148a-5p	-0.12	-0.12
TNPO2	ENST00000425528.1	transportin 2	1620	1	0	1	0	0	hsa-miR-148a-5p	-0.12	-0.12
ARL6IP6	ENST00000326446.5	ADP-ribosylation-like factor 6 interacting protein 6	1454	1	0	1	0	0	hsa-miR-148a-5p	-0.12	-0.13
VTI1B	ENST00000554659.1	vesicle transport through interaction with t-SNAREs 1B	264	2	0	2	0	0	hsa-miR-148a-5p	-0.12	-0.13
TNFAIP8	ENST00000504771.2	tumor necrosis factor, alpha-induced protein 8	608	3	0	3	0	2	hsa-miR-148a-5p	-0.12	-0.25
SLC30A1	ENST00000367001.4	solute carrier family 30 (zinc transporter), member 1	831	1	0	1	0	0	hsa-miR-148a-5p	-0.12	-0.17
CCDC91	ENST00000539107.1	coiled-coil domain containing 91	215	1	0	0	1	0	hsa-miR-148a-5p	-0.12	-0.12
ANKEF1	ENST00000378380.3	ankyrin repeat and EF-hand domain containing 1	25	1	0	1	0	0	hsa-miR-148a-5p	-0.12	-0.12
NEUROD6	ENST00000297142.3	neuronal differentiation 6	5	1	0	1	0	0	hsa-miR-148a-5p	-0.12	-0.12
CTAGE1	ENST00000391403.2	cutaneous T-cell lymphoma-associated antigen 1	5	2	0	2	0	0	hsa-miR-148a-5p	-0.12	-0.12
FAM167A	ENST00000284486.4	family with sequence similarity 167, member A	85	2	0	2	0	1	hsa-miR-148a-5p	-0.12	-0.12
LPAR6	ENST00000378434.4	lysophosphatidic acid receptor 6	5	1	0	1	0	0	hsa-miR-148a-5p	-0.12	-0.12
LIX1	ENST00000274382.4	Lix1 homolog (chicken)	5	1	0	1	0	0	hsa-miR-148a-5p	-0.12	-0.12
PCSK5	ENST00000376752.4	proprotein convertase subtilisin/kexin type 5	68	1	1	0	0	0	hsa-miR-148a-5p	-0.12	-0.12
SATB2	ENST00000417098.1	SATB homeobox 2	820	1	1	0	0	0	hsa-miR-148a-5p	-0.12	-0.14
NR5A2	ENST00000367362.3	nuclear receptor subfamily 5, group A, member 2	121	1	0	0	1	1	hsa-miR-148a-5p	-0.12	-0.16
KIF13A	ENST00000378814.5	kinesin family member 13A	725	1	1	0	0	1	hsa-miR-148a-5p	-0.12	-0.13
POU2F1	ENST00000367866.2	POU class 2 homeobox 1	83	6	2	3	1	2	hsa-miR-148a-5p	-0.12	-0.13
SCML1	ENST00000380045.3	sex comb on midleg-like 1 (Drosophila)	722	1	0	1	0	0	hsa-miR-148a-5p	-0.12	-0.12
EDC3	ENST00000315127.4	enhancer of mRNA decapping 3	328	1	1	0	0	0	hsa-miR-148a-5p	-0.12	-0.25
SIT1	ENST00000259608.3	signaling threshold regulating transmembrane adaptor 1	7	1	0	0	1	0	hsa-miR-148a-5p	-0.12	-0.12
SYT10	ENST00000228567.3	synaptotagmin X	5	2	0	1	1	0	hsa-miR-148a-5p	-0.12	-0.12
SMAD9	ENST00000399275.2	SMAD family member 9	62	3	0	3	0	0	hsa-miR-148a-5p	-0.12	-0.13
OXR1	ENST00000312046.6	oxidation resistance 1	27	1	1	0	0	0	hsa-miR-148a-5p	-0.12	-0.12
SUMF1	ENST00000272902.5	sulfatase modifying factor 1	1341	1	0	1	0	0	hsa-miR-148a-5p	-0.12	-0.12
CCNY	ENST00000374706.1	cyclin Y	672	1	0	1	0	0	hsa-miR-148a-5p	-0.12	-0.14
COL5A2	ENST00000374866.3	collagen, type V, alpha 2	4327	2	0	2	0	1	hsa-miR-148a-5p	-0.12	-0.16
TGIF2LY	ENST00000321217.4	TGFB-induced factor homeobox 2-like, Y-linked	5	2	1	1	0	0	hsa-miR-148a-5p	-0.12	-0.37
WIPF2	ENST00000323571.4	WAS/WASL interacting protein family, member 2	214	1	0	0	1	2	hsa-miR-148a-5p	-0.12	-0.13
VKORC1L1	ENST00000360768.3	vitamin K epoxide reductase complex, subunit 1-like 1	2291	1	1	0	0	1	hsa-miR-148a-5p	-0.12	-0.24
SGIP1	ENST00000371036.3	SH3-domain GRB2-like (endophilin) interacting protein 1	180	1	1	0	0	0	hsa-miR-148a-5p	-0.12	-0.36
ZEB1	ENST00000361642.5	zinc finger E-box binding homeobox 1	59	2	1	1	0	0	hsa-miR-148a-5p	-0.12	-0.12
AJAP1	ENST00000378191.4	adherens junctions associated protein 1	5	2	1	1	0	5	hsa-miR-148a-5p	-0.12	-0.12
C1QTNF9	ENST00000382071.2	C1q and tumor necrosis factor related protein 9	5	1	0	0	1	0	hsa-miR-148a-5p	-0.12	-0.12
NME9	ENST00000333911.3	NME/NM23 family member 9	5	1	0	0	1	0	hsa-miR-148a-5p	-0.12	-0.12
PIAS3	ENST00000393045.2	protein inhibitor of activated STAT, 3	155	1	0	1	0	0	hsa-miR-148a-5p	-0.12	-0.12
RASA4	ENST00000262940.7	RAS p21 protein activator 4	5	2	0	1	1	2	hsa-miR-148a-5p	-0.12	-0.12
NT5DC3	ENST00000392876.3	5'-nucleotidase domain containing 3	235	1	0	0	1	0	hsa-miR-148a-5p	-0.12	-0.12
ENKUR	ENST00000376363.1	enkurin, TRPC channel interacting protein	7	1	0	1	0	0	hsa-miR-148a-5p	-0.12	-0.13
VAPB	ENST00000395802.3	VAMP (vesicle-associated membrane protein)-associated protein B and C	391	1	0	0	1	1	hsa-miR-148a-5p	-0.12	-0.14
BTF3L4	ENST00000489308.2	basic transcription factor 3-like 4	1245	1	0	1	0	0	hsa-miR-148a-5p	-0.12	-0.12
SART3	ENST00000228284.3	squamous cell carcinoma antigen recognized by T cells 3	469	1	0	1	0	0	hsa-miR-148a-5p	-0.12	-0.2
HIST1H3E	ENST00000360408.1	histone cluster 1, H3e	22	1	0	1	0	0	hsa-miR-148a-5p	-0.12	-0.18
LRP11	ENST00000239367.2	low density lipoprotein receptor-related protein 11	3235	1	0	0	1	0	hsa-miR-148a-5p	-0.12	-0.12
ID4	ENST00000378700.3	inhibitor of DNA binding 4, dominant negative helix-loop-helix protein	3400	2	0	2	0	0	hsa-miR-148a-5p	-0.12	-0.33
EPB41L5	ENST00000443902.2	erythrocyte membrane protein band 4.1 like 5	108	1	0	1	0	1	hsa-miR-148a-5p	-0.12	-0.12
CWC27	ENST00000381070.3	CWC27 spliceosome-associated protein homolog (S. cerevisiae)	94	1	0	1	0	0	hsa-miR-148a-5p	-0.12	-0.12
ZNF20	ENST00000334213.5	zinc finger protein 20	119	1	0	1	0	0	hsa-miR-148a-5p	-0.12	-0.12
TCAIM	ENST00000342649.4	T cell activation inhibitor, mitochondrial	844	1	0	0	1	0	hsa-miR-148a-5p	-0.12	-0.12
PCGF3	ENST00000362003.5	polycomb group ring finger 3	503	2	2	0	0	0	hsa-miR-148a-5p	-0.12	-0.39
AC022498.1	ENST00000392468.2	Uncharacterized protein	5	1	0	0	1	0	hsa-miR-148a-5p	-0.12	-0.12
CNR1	ENST00000362094.5	cannabinoid receptor 1 (brain)	40	1	0	1	0	0	hsa-miR-148a-5p	-0.12	-0.12
KNTC1	ENST00000537348.1	kinetochore associated 1	437	1	0	1	0	0	hsa-miR-148a-5p	-0.12	-0.12
ZBTB37	ENST00000367701.5	zinc finger and BTB domain containing 37	213	4	2	1	1	4	hsa-miR-148a-5p	-0.12	-0.12
ASCC1	ENST00000342444.4	activating signal cointegrator 1 complex subunit 1	293	2	0	2	0	1	hsa-miR-148a-5p	-0.12	-0.17
USP46	ENST00000441222.3	ubiquitin specific peptidase 46	180	1	1	0	0	1	hsa-miR-148a-5p	-0.12	-0.13
KDM1B	ENST00000388870.2	lysine (K)-specific demethylase 1B	238	2	0	2	0	0	hsa-miR-148a-5p	-0.12	-0.16
SGOL1	ENST00000442720.1	shugoshin-like 1 (S. pombe)	766	1	0	1	0	0	hsa-miR-148a-5p	-0.12	-0.22
ZDHHC9	ENST00000357166.6	zinc finger, DHHC-type containing 9	1203	1	0	1	0	0	hsa-miR-148a-5p	-0.12	-0.12
GLRB	ENST00000541722.1	glycine receptor, beta	118	1	0	1	0	1	hsa-miR-148a-5p	-0.12	-0.13
C21orf91	ENST00000400558.3	chromosome 21 open reading frame 91	998	2	0	0	2	1	hsa-miR-148a-5p	-0.12	-0.14
HSD17B13	ENST00000302219.6	hydroxysteroid (17-beta) dehydrogenase 13	11	1	1	0	0	0	hsa-miR-148a-5p	-0.12	-0.28
SGK3	ENST00000345714.4	serum/glucocorticoid regulated kinase family, member 3	56	1	0	1	0	0	hsa-miR-148a-5p	-0.12	-0.17
PVRL3	ENST00000319792.3	poliovirus receptor-related 3	361	1	0	1	0	2	hsa-miR-148a-5p	-0.12	-0.23
PBOV1	ENST00000527246.2	prostate and breast cancer overexpressed 1	5	1	0	1	0	0	hsa-miR-148a-5p	-0.12	-0.12
C1ORF220	ENST00000367636.4		5	1	0	1	0	0	hsa-miR-148a-5p	-0.12	-0.12
BOC	ENST00000485230.1	BOC cell adhesion associated, oncogene regulated	159	1	0	1	0	0	hsa-miR-148a-5p	-0.12	-0.12
CDC37L1	ENST00000381854.3	cell division cycle 37-like 1	280	1	0	1	0	0	hsa-miR-148a-5p	-0.12	-0.12
RBM22	ENST00000199814.4	RNA binding motif protein 22	4854	2	1	1	0	0	hsa-miR-148a-5p	-0.12	-0.25
FSTL1	ENST00000295633.3	follistatin-like 1	6788	1	1	0	0	2	hsa-miR-148a-5p	-0.12	-0.15
THAP5	ENST00000415914.3	THAP domain containing 5	571	1	0	1	0	0	hsa-miR-148a-5p	-0.12	-0.12
PYCRL	ENST00000220966.6	pyrroline-5-carboxylate reductase-like	656	1	1	0	0	0	hsa-miR-148a-5p	-0.12	-0.14
GOLGA1	ENST00000373555.4	golgin A1	334	1	0	1	0	0	hsa-miR-148a-5p	-0.12	-0.12
PRPH2	ENST00000230381.5	peripherin 2 (retinal degeneration, slow)	5	1	0	1	0	0	hsa-miR-148a-5p	-0.12	-0.12
FXYD6	ENST00000540359.1	FXYD domain containing ion transport regulator 6	42	1	0	1	0	0	hsa-miR-148a-5p	-0.12	-0.12
GPR151	ENST00000311104.2	G protein-coupled receptor 151	5	1	0	1	0	2	hsa-miR-148a-5p	-0.12	-0.12
AGPAT4	ENST00000366911.5	1-acylglycerol-3-phosphate O-acyltransferase 4	142	1	1	0	0	2	hsa-miR-148a-5p	-0.12	-0.18
FLJ20373	ENST00000414004.2		75	1	0	1	0	0	hsa-miR-148a-5p	-0.12	-0.12
SERF1B	ENST00000380750.3	small EDRK-rich factor 1B (centromeric)	5	1	0	1	0	0	hsa-miR-148a-5p	-0.12	-0.12
CDA	ENST00000375071.3	cytidine deaminase	302	1	0	1	0	0	hsa-miR-148a-5p	-0.12	-0.12
ROCK1	ENST00000399799.2	Rho-associated, coiled-coil containing protein kinase 1	7	2	1	0	1	1	hsa-miR-148a-5p	-0.12	-0.12
AMPD3	ENST00000444303.2	adenosine monophosphate deaminase 3	5	2	0	1	1	0	hsa-miR-148a-5p	-0.12	-0.12
SERF1A	ENST00000354833.3	small EDRK-rich factor 1A (telomeric)	5	1	0	1	0	0	hsa-miR-148a-5p	-0.12	-0.12
HELLS	ENST00000394036.1	helicase, lymphoid-specific	329	1	0	1	0	0	hsa-miR-148a-5p	-0.12	-0.12
FAM60A	ENST00000539409.1	family with sequence similarity 60, member A	58	1	0	0	1	1	hsa-miR-148a-5p	-0.12	-0.12
SUDS3	ENST00000397564.2	suppressor of defective silencing 3 homolog (S. cerevisiae)	224	2	1	1	0	1	hsa-miR-148a-5p	-0.12	-0.13
PLA2G4C	ENST00000354276.3	phospholipase A2, group IVC (cytosolic, calcium-independent)	12	1	0	1	0	0	hsa-miR-148a-5p	-0.11	-0.12
FRY	ENST00000380250.3	furry homolog (Drosophila)	18	2	0	2	0	1	hsa-miR-148a-5p	-0.11	-0.2
MAGEF1	ENST00000317897.3	melanoma antigen family F, 1	41	1	0	1	0	0	hsa-miR-148a-5p	-0.11	-0.2
WIPF1	ENST00000392547.2	WAS/WASL interacting protein family, member 1	304	1	1	0	0	1	hsa-miR-148a-5p	-0.11	-0.27
KLHDC1	ENST00000359332.2	kelch domain containing 1	5	1	0	1	0	0	hsa-miR-148a-5p	-0.11	-0.11
PANK3	ENST00000239231.6	pantothenate kinase 3	522	3	0	3	0	0	hsa-miR-148a-5p	-0.11	-0.17
C1QTNF1	ENST00000392445.2	C1q and tumor necrosis factor related protein 1	74	1	0	1	0	1	hsa-miR-148a-5p	-0.11	-0.11
KCNA3	ENST00000369769.2	potassium voltage-gated channel, shaker-related subfamily, member 3	5	1	0	1	0	0	hsa-miR-148a-5p	-0.11	-0.11
CYBB	ENST00000378588.4	cytochrome b-245, beta polypeptide	12	1	0	0	1	0	hsa-miR-148a-5p	-0.11	-0.11
NTRK3	ENST00000394480.2	neurotrophic tyrosine kinase, receptor, type 3	7	1	1	0	0	0	hsa-miR-148a-5p	-0.11	-0.11
RNF20	ENST00000389120.3	ring finger protein 20, E3 ubiquitin protein ligase	772	2	0	1	1	1	hsa-miR-148a-5p	-0.11	-0.12
RUFY3	ENST00000381006.3	RUN and FYVE domain containing 3	162	1	0	0	1	1	hsa-miR-148a-5p	-0.11	-0.12
GDA	ENST00000358399.3	guanine deaminase	5	2	0	2	0	1	hsa-miR-148a-5p	-0.11	-0.11
AC074091.13	ENST00000379677.2	Uncharacterized protein	5	1	0	1	0	1	hsa-miR-148a-5p	-0.11	-0.11
RFC3	ENST00000380071.3	replication factor C (activator 1) 3, 38kDa	150	1	0	0	1	0	hsa-miR-148a-5p	-0.11	-0.12
PCMT1	ENST00000367384.2	protein-L-isoaspartate (D-aspartate) O-methyltransferase	573	1	0	0	1	0	hsa-miR-148a-5p	-0.11	-0.17
HOPX	ENST00000420433.1	HOP homeobox	55	1	0	0	1	0	hsa-miR-148a-5p	-0.11	-0.12
CYCS	ENST00000305786.2	cytochrome c, somatic	320	2	0	2	0	1	hsa-miR-148a-5p	-0.11	-0.22
SETD3	ENST00000331768.5	SET domain containing 3	58	2	0	2	0	0	hsa-miR-148a-5p	-0.11	-0.13
SNX22	ENST00000325881.4	sorting nexin 22	5	2	0	2	0	0	hsa-miR-148a-5p	-0.11	-0.11
AC069547.2	ENST00000596442.1	Uncharacterized protein	5	1	0	0	1	0	hsa-miR-148a-5p	-0.11	-0.11
PLCB1	ENST00000378641.3	phospholipase C, beta 1 (phosphoinositide-specific)	21	1	1	0	0	1	hsa-miR-148a-5p	-0.11	-0.11
ARL5B	ENST00000377275.3	ADP-ribosylation factor-like 5B	368	2	1	0	1	0	hsa-miR-148a-5p	-0.11	-0.13
RC3H1	ENST00000367696.2	ring finger and CCCH-type domains 1	165	2	1	0	1	3	hsa-miR-148a-5p	-0.11	-0.12
TRPV2	ENST00000338560.7	transient receptor potential cation channel, subfamily V, member 2	22341	2	1	0	1	0	hsa-miR-148a-5p	-0.11	-0.11
FAM9C	ENST00000542843.1	family with sequence similarity 9, member C	5	1	0	1	0	1	hsa-miR-148a-5p	-0.11	-0.11
IGFBP3	ENST00000381086.5	insulin-like growth factor binding protein 3	1857	1	0	0	1	0	hsa-miR-148a-5p	-0.11	-0.12
ARHGEF26	ENST00000356448.4	Rho guanine nucleotide exchange factor (GEF) 26	164	1	0	1	0	0	hsa-miR-148a-5p	-0.11	-0.11
GRM3	ENST00000361669.2	glutamate receptor, metabotropic 3	10	1	0	1	0	0	hsa-miR-148a-5p	-0.11	-0.11
OR9Q1	ENST00000335397.3	olfactory receptor, family 9, subfamily Q, member 1	5	1	0	1	0	0	hsa-miR-148a-5p	-0.11	-0.11
DOK6	ENST00000382713.5	docking protein 6	8	2	1	1	0	1	hsa-miR-148a-5p	-0.11	-0.11
RFFL	ENST00000315249.7	ring finger and FYVE-like domain containing E3 ubiquitin protein ligase	670	3	0	3	0	1	hsa-miR-148a-5p	-0.11	-0.15
C12orf4	ENST00000261250.3	chromosome 12 open reading frame 4	37	1	0	1	0	2	hsa-miR-148a-5p	-0.11	-0.11
CLHC1	ENST00000406437.2	clathrin heavy chain linker domain containing 1	21	2	0	1	1	0	hsa-miR-148a-5p	-0.11	-0.18
TMEM131	ENST00000186436.5	transmembrane protein 131	111	1	0	0	1	0	hsa-miR-148a-5p	-0.11	-0.11
PJA2	ENST00000361189.2	praja ring finger 2, E3 ubiquitin protein ligase	220	2	0	1	1	0	hsa-miR-148a-5p	-0.11	-0.13
ELL	ENST00000262809.4	elongation factor RNA polymerase II	250	1	0	1	0	0	hsa-miR-148a-5p	-0.11	-0.15
BDP1	ENST00000380675.2	B double prime 1, subunit of RNA polymerase III transcription initiation factor IIIB	12	1	0	1	0	2	hsa-miR-148a-5p	-0.11	-0.11
PNPLA2	ENST00000336615.4	patatin-like phospholipase domain containing 2	6586	1	0	1	0	0	hsa-miR-148a-5p	-0.11	-0.11
CLDN8	ENST00000399899.1	claudin 8	5	1	0	1	0	0	hsa-miR-148a-5p	-0.11	-0.11
AC093802.1	ENST00000407524.1	Uncharacterized protein	5	1	0	1	0	1	hsa-miR-148a-5p	-0.11	-0.11
GALNTL6	ENST00000506823.1	UDP-N-acetyl-alpha-D-galactosamine:polypeptide N-acetylgalactosaminyltransferase-like 6	26	2	0	2	0	0	hsa-miR-148a-5p	-0.11	-0.11
AL354993.1	ENST00000439873.2	Cell growth-inhibiting protein 7; HCG1784586; Uncharacterized protein	9	2	0	1	1	0	hsa-miR-148a-5p	-0.11	-0.25
CYP2U1	ENST00000332884.6	cytochrome P450, family 2, subfamily U, polypeptide 1	202	3	0	2	1	0	hsa-miR-148a-5p	-0.11	-0.11
SGMS2	ENST00000394684.4	sphingomyelin synthase 2	111	1	0	1	0	0	hsa-miR-148a-5p	-0.11	-0.12
TNFRSF10D	ENST00000312584.3	tumor necrosis factor receptor superfamily, member 10d, decoy with truncated death domain	161	1	0	1	0	0	hsa-miR-148a-5p	-0.11	-0.11
EFCC1	ENST00000436022.2	EF-hand and coiled-coil domain containing 1	5	1	0	1	0	0	hsa-miR-148a-5p	-0.11	-0.11
L3MBTL3	ENST00000529410.1	l(3)mbt-like 3 (Drosophila)	60	1	0	1	0	0	hsa-miR-148a-5p	-0.11	-0.11
NPL	ENST00000367553.1	N-acetylneuraminate pyruvate lyase (dihydrodipicolinate synthase)	19	1	0	1	0	1	hsa-miR-148a-5p	-0.11	-0.11
KANSL1	ENST00000574590.1	KAT8 regulatory NSL complex subunit 1	5	2	1	0	1	0	hsa-miR-148a-5p	-0.11	-0.11
SLC25A20	ENST00000430379.1	solute carrier family 25 (carnitine/acylcarnitine translocase), member 20	6430	1	0	1	0	0	hsa-miR-148a-5p	-0.11	-0.11
MPZL1	ENST00000474859.1	myelin protein zero-like 1	3146	1	0	1	0	1	hsa-miR-148a-5p	-0.11	-0.13
DLST	ENST00000334220.4	dihydrolipoamide S-succinyltransferase (E2 component of 2-oxo-glutarate complex)	64	1	0	1	0	0	hsa-miR-148a-5p	-0.11	-0.11
WDR33	ENST00000322313.4	WD repeat domain 33	537	1	0	1	0	3	hsa-miR-148a-5p	-0.11	-0.11
CBLN2	ENST00000585159.1	cerebellin 2 precursor	23	1	0	0	1	1	hsa-miR-148a-5p	-0.11	-0.11
FAM13B	ENST00000033079.3	family with sequence similarity 13, member B	220	2	0	2	0	0	hsa-miR-148a-5p	-0.11	-0.16
AASS	ENST00000393376.1	aminoadipate-semialdehyde synthase	72	1	0	1	0	0	hsa-miR-148a-5p	-0.11	-0.12
METTL9	ENST00000358154.3	methyltransferase like 9	220	2	0	2	0	1	hsa-miR-148a-5p	-0.11	-0.13
FAM19A1	ENST00000478136.1	family with sequence similarity 19 (chemokine (C-C motif)-like), member A1	5	2	0	2	0	0	hsa-miR-148a-5p	-0.11	-0.25
TRPM3	ENST00000377110.3	transient receptor potential cation channel, subfamily M, member 3	11	2	0	0	2	0	hsa-miR-148a-5p	-0.11	-0.12
ZNF350	ENST00000243644.4	zinc finger protein 350	13	2	0	2	0	0	hsa-miR-148a-5p	-0.11	-0.33
POC1B-GALNT4	ENST00000547474.1	POC1B-GALNT4 readthrough	275	1	0	1	0	0	hsa-miR-148a-5p	-0.11	-0.11
SMEK2	ENST00000272313.5	SMEK homolog 2, suppressor of mek1 (Dictyostelium)	342	2	0	1	1	1	hsa-miR-148a-5p	-0.11	-0.11
FAM156A	ENST00000356333.4	family with sequence similarity 156, member A	5	1	0	1	0	0	hsa-miR-148a-5p	-0.11	-0.11
CDO1	ENST00000250535.4	cysteine dioxygenase type 1	74	1	0	0	1	0	hsa-miR-148a-5p	-0.11	-0.11
FAM156B	ENST00000430150.2	family with sequence similarity 156, member B	5	1	0	1	0	0	hsa-miR-148a-5p	-0.11	-0.11
ENPP3	ENST00000358229.5	ectonucleotide pyrophosphatase/phosphodiesterase 3	37	1	0	1	0	0	hsa-miR-148a-5p	-0.11	-0.11
ANK2	ENST00000357077.4	ankyrin 2, neuronal	133	2	0	2	0	0	hsa-miR-148a-5p	-0.11	-0.11
KBTBD7	ENST00000379483.3	kelch repeat and BTB (POZ) domain containing 7	362	1	0	1	0	0	hsa-miR-148a-5p	-0.11	-0.11
SLC25A46	ENST00000355943.3	solute carrier family 25, member 46	391	2	0	1	1	0	hsa-miR-148a-5p	-0.11	-0.21
GTF2F1	ENST00000394456.5	general transcription factor IIF, polypeptide 1, 74kDa	1014	2	1	1	0	0	hsa-miR-148a-5p	-0.11	-0.22
RB1CC1	ENST00000025008.5	RB1-inducible coiled-coil 1	621	1	0	0	1	0	hsa-miR-148a-5p	-0.11	-0.11
RELL1	ENST00000314117.4	RELT-like 1	10	1	0	1	0	0	hsa-miR-148a-5p	-0.11	-0.23
SULT1B1	ENST00000310613.3	sulfotransferase family, cytosolic, 1B, member 1	5	2	0	2	0	3	hsa-miR-148a-5p	-0.1	-0.1
TMEM182	ENST00000412401.2	transmembrane protein 182	69	1	0	0	1	0	hsa-miR-148a-5p	-0.1	-0.1
TSC22D3	ENST00000372390.4	TSC22 domain family, member 3	154	1	0	1	0	0	hsa-miR-148a-5p	-0.1	-0.1
CNTD1	ENST00000588408.1	cyclin N-terminal domain containing 1	7	1	0	1	0	2	hsa-miR-148a-5p	-0.1	-0.1
AC010336.1	ENST00000539278.1	Uncharacterized protein	8	1	0	0	1	2	hsa-miR-148a-5p	-0.1	-0.1
KCNJ6	ENST00000609713.1	potassium inwardly-rectifying channel, subfamily J, member 6	5	2	0	2	0	5	hsa-miR-148a-5p	-0.1	-0.1
GSTO2	ENST00000369707.2	glutathione S-transferase omega 2	97	5	0	3	2	1	hsa-miR-148a-5p	-0.1	-0.2
DUSP19	ENST00000354221.4	dual specificity phosphatase 19	42	1	0	1	0	0	hsa-miR-148a-5p	-0.1	-0.14
UHRF1BP1L	ENST00000279907.7	UHRF1 binding protein 1-like	369	5	0	2	3	0	hsa-miR-148a-5p	-0.1	-0.26
NCR3LG1	ENST00000338965.4	natural killer cell cytotoxicity receptor 3 ligand 1	214	3	0	2	1	0	hsa-miR-148a-5p	-0.1	-0.11
ZNF106	ENST00000263805.4	zinc finger protein 106	406	1	0	1	0	2	hsa-miR-148a-5p	-0.1	-0.11
CCDC43	ENST00000457422.2	coiled-coil domain containing 43	36	1	0	0	1	0	hsa-miR-148a-5p	-0.1	-0.1
FOXO1	ENST00000379561.5	forkhead box O1	480	1	1	0	0	1	hsa-miR-148a-5p	-0.1	-0.11
PTPRC	ENST00000367376.2	protein tyrosine phosphatase, receptor type, C	5	1	0	0	1	0	hsa-miR-148a-5p	-0.1	-0.1
ZDHHC15	ENST00000373367.3	zinc finger, DHHC-type containing 15	5	2	0	2	0	0	hsa-miR-148a-5p	-0.1	-0.1
DERA	ENST00000428559.2	deoxyribose-phosphate aldolase (putative)	2028	1	0	0	1	0	hsa-miR-148a-5p	-0.1	-0.11
LOH12CR1	ENST00000314565.4	loss of heterozygosity, 12, chromosomal region 1	135	1	1	0	0	2	hsa-miR-148a-5p	-0.1	-0.3
C8orf44-SGK3	ENST00000519289.1	C8orf44-SGK3 readthrough	56	1	0	1	0	0	hsa-miR-148a-5p	-0.1	-0.18
WDFY1	ENST00000233055.4	WD repeat and FYVE domain containing 1	88	2	0	0	2	1	hsa-miR-148a-5p	-0.1	-0.1
EDNRB	ENST00000377211.4	endothelin receptor type B	5	1	0	1	0	0	hsa-miR-148a-5p	-0.1	-0.1
COPS4	ENST00000511653.1	COP9 signalosome subunit 4	3501	1	0	1	0	0	hsa-miR-148a-5p	-0.1	-0.1
NHS	ENST00000380060.3	Nance-Horan syndrome (congenital cataracts and dental anomalies)	72	1	0	0	1	2	hsa-miR-148a-5p	-0.1	-0.1
P4HA3	ENST00000331597.4	prolyl 4-hydroxylase, alpha polypeptide III	5	1	0	1	0	0	hsa-miR-148a-5p	-0.1	-0.1
RNPC3	ENST00000533099.1	RNA-binding region (RNP1, RRM) containing 3	419	1	0	0	1	0	hsa-miR-148a-5p	-0.1	-0.1
PPEF1	ENST00000543630.1	protein phosphatase, EF-hand calcium binding domain 1	9	1	0	0	1	0	hsa-miR-148a-5p	-0.1	-0.1
YOD1	ENST00000315927.4	YOD1 deubiquitinase	55	1	0	1	0	0	hsa-miR-148a-5p	-0.1	-0.12
OAS2	ENST00000392583.2	2'-5'-oligoadenylate synthetase 2, 69/71kDa	5	2	0	2	0	0	hsa-miR-148a-5p	-0.1	-0.1
RP11-422N16.3	ENST00000499579.1	Uncharacterized protein	5	1	0	1	0	1	hsa-miR-148a-5p	-0.1	-0.1
C3orf70	ENST00000335012.2	chromosome 3 open reading frame 70	19	1	0	1	0	0	hsa-miR-148a-5p	-0.1	-0.1
RPP14	ENST00000445193.3	ribonuclease P/MRP 14kDa subunit	1612	1	0	0	1	0	hsa-miR-148a-5p	-0.1	-0.1
TMEM194A	ENST00000379391.3	transmembrane protein 194A	43	1	0	0	1	1	hsa-miR-148a-5p	-0.1	-0.1
TDRP	ENST00000324079.6	testis development related protein	235	1	0	1	0	1	hsa-miR-148a-5p	-0.1	-0.12
SEC16A	ENST00000313050.7	SEC16 homolog A (S. cerevisiae)	814	1	0	0	1	1	hsa-miR-148a-5p	-0.1	-0.1
SESTD1	ENST00000428443.3	SEC14 and spectrin domains 1	478	3	2	1	0	1	hsa-miR-148a-5p	-0.1	-0.41
ZNF417	ENST00000312026.5	zinc finger protein 417	19	2	0	2	0	1	hsa-miR-148a-5p	-0.1	-0.12
SLC7A2	ENST00000494857.1	solute carrier family 7 (cationic amino acid transporter, y+ system), member 2	1233	2	0	2	0	1	hsa-miR-148a-5p	-0.1	-0.1
ZNF148	ENST00000360647.4	zinc finger protein 148	230	3	0	2	1	1	hsa-miR-148a-5p	-0.1	-0.11
AHCTF1	ENST00000366508.1	AT hook containing transcription factor 1	5	1	0	0	1	2	hsa-miR-148a-5p	-0.1	-0.1
C11orf82	ENST00000528759.1	chromosome 11 open reading frame 82	579	1	0	1	0	1	hsa-miR-148a-5p	-0.1	-0.1
FCAMR	ENST00000400962.3	Fc receptor, IgA, IgM, high affinity	5	1	0	1	0	0	hsa-miR-148a-5p	-0.1	-0.1
ANKRD20A4	ENST00000357336.3	ankyrin repeat domain 20 family, member A4	5	1	0	0	1	1	hsa-miR-148a-5p	-0.1	-0.1
LCP1	ENST00000398576.2	lymphocyte cytosolic protein 1 (L-plastin)	7	2	0	0	2	0	hsa-miR-148a-5p	-0.1	-0.1
ARHGAP6	ENST00000380736.1	Rho GTPase activating protein 6	12	1	0	1	0	1	hsa-miR-148a-5p	-0.1	-0.1
PRDM10	ENST00000358825.5	PR domain containing 10	68	2	0	2	0	0	hsa-miR-148a-5p	-0.1	-0.1
PRKRIR	ENST00000260045.3	protein-kinase, interferon-inducible double stranded RNA dependent inhibitor, repressor of (P58 repressor)	13	1	0	0	1	0	hsa-miR-148a-5p	-0.1	-0.1
ANKRD20A3	ENST00000254835.2	ankyrin repeat domain 20 family, member A3	5	1	0	0	1	1	hsa-miR-148a-5p	-0.1	-0.1
EPGN	ENST00000413830.1	epithelial mitogen	26	1	1	0	0	0	hsa-miR-148a-5p	-0.1	-0.24
TCEAL8	ENST00000360000.4	transcription elongation factor A (SII)-like 8	227	1	0	1	0	0	hsa-miR-148a-5p	-0.1	-0.29
HIST1H2AC	ENST00000602637.1	histone cluster 1, H2ac	1665	1	0	1	0	0	hsa-miR-148a-5p	-0.1	-0.11
PPP3CA	ENST00000512215.1	protein phosphatase 3, catalytic subunit, alpha isozyme	259	1	0	0	1	0	hsa-miR-148a-5p	-0.1	-0.1
CDKL2	ENST00000429927.2	cyclin-dependent kinase-like 2 (CDC2-related kinase)	7	2	1	1	0	2	hsa-miR-148a-5p	-0.1	-0.3
EFEMP1	ENST00000394555.2	EGF containing fibulin-like extracellular matrix protein 1	992	1	0	0	1	0	hsa-miR-148a-5p	-0.1	-0.15
ZBTB7C	ENST00000535628.2	zinc finger and BTB domain containing 7C	23	2	0	2	0	1	hsa-miR-148a-5p	-0.1	-0.1
SAMD12	ENST00000409003.4	sterile alpha motif domain containing 12	57	1	0	1	0	0	hsa-miR-148a-5p	-0.1	-0.1
TMEM236	ENST00000377495.1	transmembrane protein 236	5	1	1	0	0	0	hsa-miR-148a-5p	-0.1	-0.1
BARHL2	ENST00000370445.4	BarH-like homeobox 2	13	1	0	1	0	0	hsa-miR-148a-5p	-0.1	-0.1
C10orf137	ENST00000337623.3	chromosome 10 open reading frame 137	157	1	0	1	0	0	hsa-miR-148a-5p	-0.1	-0.1
SHOX2	ENST00000490689.2	short stature homeobox 2	66	1	0	0	1	1	hsa-miR-148a-5p	-0.1	-0.11
UBN2	ENST00000473989.3	ubinuclein 2	238	4	2	2	0	3	hsa-miR-148a-5p	-0.1	-0.12
ZSCAN20	ENST00000361328.3	zinc finger and SCAN domain containing 20	55	1	0	1	0	0	hsa-miR-148a-5p	-0.1	-0.11
NT5E	ENST00000369651.3	5'-nucleotidase, ecto (CD73)	285	2	0	2	0	0	hsa-miR-148a-5p	-0.1	-0.2
TRAK1	ENST00000341421.3	trafficking protein, kinesin binding 1	362	1	1	0	0	0	hsa-miR-148a-5p	-0.1	-0.1
KAZALD1	ENST00000370200.5	Kazal-type serine peptidase inhibitor domain 1	186	1	0	1	0	1	hsa-miR-148a-5p	-0.1	-0.11
GABRA3	ENST00000370314.4	gamma-aminobutyric acid (GABA) A receptor, alpha 3	55	1	0	0	1	1	hsa-miR-148a-5p	-0.1	-0.1
KCND3	ENST00000369697.1	potassium voltage-gated channel, Shal-related subfamily, member 3	23	2	1	0	1	0	hsa-miR-148a-5p	-0.1	-0.1
UBE2I	ENST00000355803.4	ubiquitin-conjugating enzyme E2I	291	1	0	1	0	0	hsa-miR-148a-5p	-0.1	-0.1
EVA1A	ENST00000393913.3	eva-1 homolog A (C. elegans)	45	1	0	0	1	0	hsa-miR-148a-5p	-0.1	-0.1
NT5C1B	ENST00000600945.1	5'-nucleotidase, cytosolic IB	567	1	0	1	0	0	hsa-miR-148a-5p	-0.1	-0.1
TMEM56	ENST00000370203.4	transmembrane protein 56	113	2	0	1	1	0	hsa-miR-148a-5p	-0.1	-0.16
PGAM5	ENST00000498926.2	phosphoglycerate mutase family member 5	2219	1	1	0	0	0	hsa-miR-148a-5p	-0.1	-0.16
CAPN9	ENST00000354537.1	calpain 9	5	1	0	1	0	0	hsa-miR-148a-5p	-0.1	-0.1
TENM2	ENST00000519204.1	teneurin transmembrane protein 2	162	1	0	1	0	1	hsa-miR-148a-5p	-0.1	-0.1
MKNK1	ENST00000341183.5	MAP kinase interacting serine/threonine kinase 1	150	1	0	0	1	1	hsa-miR-148a-5p	-0.1	-0.1
ST6GAL2	ENST00000361686.4	ST6 beta-galactosamide alpha-2,6-sialyltranferase 2	5	2	0	2	0	2	hsa-miR-148a-5p	-0.1	-0.1
NT5C1B-RDH14	ENST00000532967.1	NT5C1B-RDH14 readthrough	572	1	0	1	0	0	hsa-miR-148a-5p	-0.1	-0.1
NUDT5	ENST00000491614.1	nudix (nucleoside diphosphate linked moiety X)-type motif 5	808	1	0	1	0	0	hsa-miR-148a-5p	-0.1	-0.1
ZMAT3	ENST00000311417.2	zinc finger, matrin-type 3	459	3	0	2	1	0	hsa-miR-148a-5p	-0.1	-0.14
CLK4	ENST00000316308.4	CDC-like kinase 4	218	1	1	0	0	0	hsa-miR-148a-5p	-0.1	-0.41
ANKRD20A1	ENST00000377477.2	ankyrin repeat domain 20 family, member A1	5	1	0	0	1	1	hsa-miR-148a-5p	-0.1	-0.12
KIAA0040	ENST00000423313.1	KIAA0040	15	1	0	1	0	0	hsa-miR-148a-5p	-0.1	-0.1
ADH1B	ENST00000305046.8	alcohol dehydrogenase 1B (class I), beta polypeptide	5	1	0	1	0	0	hsa-miR-148a-5p	-0.1	-0.1
ZBTB26	ENST00000373656.3	zinc finger and BTB domain containing 26	83	1	0	1	0	1	hsa-miR-148a-5p	-0.1	-0.1
TRIM2	ENST00000338700.5	tripartite motif containing 2	22	3	1	1	1	2	hsa-miR-148a-5p	-0.1	-0.1
AKAP12	ENST00000402676.2	A kinase (PRKA) anchor protein 12	913	2	0	2	0	0	hsa-miR-148a-5p	-0.1	-0.14
ANKRD20A2	ENST00000377601.2	ankyrin repeat domain 20 family, member A2	5	1	0	0	1	1	hsa-miR-148a-5p	-0.1	-0.12
ENO1	ENST00000234590.4	enolase 1, (alpha)	1269	1	0	1	0	0	hsa-miR-148a-5p	-0.1	-0.1
SLC37A3	ENST00000447932.2	solute carrier family 37, member 3	86	1	0	0	1	2	hsa-miR-148a-5p	-0.1	-0.1
RIMKLB	ENST00000357529.3	ribosomal modification protein rimK-like family member B	164	1	1	0	0	0	hsa-miR-148a-5p	-0.1	-0.18
GREB1L	ENST00000580732.2	growth regulation by estrogen in breast cancer-like	30	2	1	1	0	0	hsa-miR-148a-5p	-0.1	-0.1
ZIC5	ENST00000267294.4	Zic family member 5	263	1	1	0	0	1	hsa-miR-148a-5p	-0.1	-0.1
C15orf54	ENST00000318578.3	chromosome 15 open reading frame 54	5	1	0	1	0	1	hsa-miR-148a-5p	-0.1	-0.1
PBX3	ENST00000342287.5	pre-B-cell leukemia homeobox 3	1142	1	0	1	0	1	hsa-miR-148a-5p	-0.1	-0.1
RS1	ENST00000379984.3	retinoschisin 1	5	1	0	0	1	1	hsa-miR-148a-5p	-0.1	-0.1
MRPL10	ENST00000351111.2	mitochondrial ribosomal protein L10	356	1	0	1	0	0	hsa-miR-148a-5p	-0.1	-0.1
RANBP6	ENST00000259569.5	RAN binding protein 6	117	1	0	1	0	2	hsa-miR-148a-5p	-0.09	-0.11
FRMD5	ENST00000484674.1	FERM domain containing 5	161	1	0	1	0	0	hsa-miR-148a-5p	-0.09	-0.12
RIC8A	ENST00000526104.1	RIC8 guanine nucleotide exchange factor A	521	1	0	1	0	0	hsa-miR-148a-5p	-0.09	-0.14
PUM1	ENST00000424085.2	pumilio RNA-binding family member 1	202	1	0	1	0	1	hsa-miR-148a-5p	-0.09	-0.12
GNB1	ENST00000378609.4	guanine nucleotide binding protein (G protein), beta polypeptide 1	3695	1	0	1	0	0	hsa-miR-148a-5p	-0.09	-0.09
DCTN4	ENST00000447998.2	dynactin 4 (p62)	153	1	0	1	0	0	hsa-miR-148a-5p	-0.09	-0.1
ZNF93	ENST00000343769.5	zinc finger protein 93	5	1	0	0	1	0	hsa-miR-148a-5p	-0.09	-0.09
SERTM1	ENST00000315190.3	serine-rich and transmembrane domain containing 1	12	1	0	0	1	0	hsa-miR-148a-5p	-0.09	-0.09
CHIT1	ENST00000367229.1	chitinase 1 (chitotriosidase)	5	1	0	1	0	0	hsa-miR-148a-5p	-0.09	-0.09
LSMEM1	ENST00000312849.4	leucine-rich single-pass membrane protein 1	10	1	0	1	0	1	hsa-miR-148a-5p	-0.09	-0.09
OCLN	ENST00000355237.2	occludin	5	1	0	1	0	1	hsa-miR-148a-5p	-0.09	-0.09
DPP8	ENST00000341861.5	dipeptidyl-peptidase 8	1293	1	0	0	1	1	hsa-miR-148a-5p	-0.09	-0.1
TRAPPC13	ENST00000399438.3	trafficking protein particle complex 13	361	1	0	1	0	0	hsa-miR-148a-5p	-0.09	-0.17
LARP1B	ENST00000441387.1	La ribonucleoprotein domain family, member 1B	32	1	0	0	1	0	hsa-miR-148a-5p	-0.09	-0.09
ZSCAN23	ENST00000289788.4	zinc finger and SCAN domain containing 23	5	1	0	1	0	0	hsa-miR-148a-5p	-0.09	-0.09
AL359878.1	ENST00000381466.1	Uncharacterized protein	5	1	0	0	1	0	hsa-miR-148a-5p	-0.09	-0.09
RGS18	ENST00000367460.3	regulator of G-protein signaling 18	5	1	0	1	0	1	hsa-miR-148a-5p	-0.09	-0.09
GSTM4	ENST00000369833.1	glutathione S-transferase mu 4	767	1	0	1	0	1	hsa-miR-148a-5p	-0.09	-0.09
ALKBH8	ENST00000428149.2	alkB, alkylation repair homolog 8 (E. coli)	23	1	1	0	0	0	hsa-miR-148a-5p	-0.09	-0.09
THAP10	ENST00000249861.4	THAP domain containing 10	22	1	0	1	0	0	hsa-miR-148a-5p	-0.09	-0.14
SS18	ENST00000415083.2	synovial sarcoma translocation, chromosome 18	205	1	0	0	1	0	hsa-miR-148a-5p	-0.09	-0.11
GNPDA2	ENST00000509756.1	glucosamine-6-phosphate deaminase 2	117	1	0	1	0	0	hsa-miR-148a-5p	-0.09	-0.11
PDK3	ENST00000441463.2	pyruvate dehydrogenase kinase, isozyme 3	659	3	1	0	2	0	hsa-miR-148a-5p	-0.09	-0.17
ZBTB10	ENST00000430430.1	zinc finger and BTB domain containing 10	113	2	1	0	1	4	hsa-miR-148a-5p	-0.09	-0.17
DCX	ENST00000356915.2	doublecortin	5	1	0	1	0	0	hsa-miR-148a-5p	-0.09	-0.09
NPHP3	ENST00000326682.8	nephronophthisis 3 (adolescent)	44	2	0	1	1	1	hsa-miR-148a-5p	-0.09	-0.09
ZNF2	ENST00000398107.2	zinc finger protein 2	95	1	0	1	0	0	hsa-miR-148a-5p	-0.09	-0.09
HECA	ENST00000367658.2	headcase homolog (Drosophila)	783	1	0	1	0	0	hsa-miR-148a-5p	-0.09	-0.09
AP000708.1	ENST00000527818.1		5	1	0	1	0	0	hsa-miR-148a-5p	-0.09	-0.09
KIAA1715	ENST00000272748.4	KIAA1715	858	2	1	1	0	2	hsa-miR-148a-5p	-0.09	-0.15
MED14	ENST00000324817.1	mediator complex subunit 14	1038	3	1	1	1	2	hsa-miR-148a-5p	-0.09	-0.13
CAMKK2	ENST00000538733.1	calcium/calmodulin-dependent protein kinase kinase 2, beta	1157	1	0	0	1	0	hsa-miR-148a-5p	-0.09	-0.09
DRD1	ENST00000393752.2	dopamine receptor D1	7	1	0	0	1	0	hsa-miR-148a-5p	-0.09	-0.09
STON1	ENST00000309835.3	stonin 1	254	1	0	0	1	0	hsa-miR-148a-5p	-0.09	-0.09
APOBR	ENST00000564831.1	apolipoprotein B receptor	5	1	0	0	1	0	hsa-miR-148a-5p	-0.09	-0.09
PRICKLE2	ENST00000295902.6	prickle homolog 2 (Drosophila)	20	2	1	0	1	1	hsa-miR-148a-5p	-0.09	-0.09
MOSPD1	ENST00000370783.3	motile sperm domain containing 1	83	1	0	0	1	1	hsa-miR-148a-5p	-0.09	-0.13
ARPP19	ENST00000566423.1	cAMP-regulated phosphoprotein, 19kDa	1316	1	1	0	0	2	hsa-miR-148a-5p	-0.09	-0.26
ARHGEF18	ENST00000319670.9	Rho/Rac guanine nucleotide exchange factor (GEF) 18	2596	1	1	0	0	0	hsa-miR-148a-5p	-0.09	-0.09
CCDC85C	ENST00000380243.4	coiled-coil domain containing 85C	86	1	0	1	0	0	hsa-miR-148a-5p	-0.09	-0.11
TAGLN2	ENST00000368096.1	transgelin 2	2192	1	0	0	1	0	hsa-miR-148a-5p	-0.09	-0.09
C15orf38	ENST00000357484.5	chromosome 15 open reading frame 38	325	1	0	1	0	2	hsa-miR-148a-5p	-0.09	-0.09
CLCN4	ENST00000380833.4	chloride channel, voltage-sensitive 4	182	3	0	2	1	1	hsa-miR-148a-5p	-0.09	-0.11
RCHY1	ENST00000451788.1	ring finger and CHY zinc finger domain containing 1, E3 ubiquitin protein ligase	821	1	0	1	0	0	hsa-miR-148a-5p	-0.09	-0.09
CCSAP	ENST00000366687.1	centriole, cilia and spindle-associated protein	1210	1	0	1	0	0	hsa-miR-148a-5p	-0.09	-0.09
RECK	ENST00000377966.3	reversion-inducing-cysteine-rich protein with kazal motifs	10	1	0	0	1	0	hsa-miR-148a-5p	-0.09	-0.09
ANKRD34C	ENST00000421388.2	ankyrin repeat domain 34C	5	1	0	1	0	1	hsa-miR-148a-5p	-0.09	-0.09
ZNF560	ENST00000301480.4	zinc finger protein 560	15	1	1	0	0	0	hsa-miR-148a-5p	-0.09	-0.14
ENPP5	ENST00000371383.2	ectonucleotide pyrophosphatase/phosphodiesterase 5 (putative)	15	4	0	1	3	0	hsa-miR-148a-5p	-0.09	-0.19
TMEM150C	ENST00000515780.2	transmembrane protein 150C	8	2	0	1	1	0	hsa-miR-148a-5p	-0.09	-0.2
GTDC1	ENST00000392869.2	glycosyltransferase-like domain containing 1	241	1	0	1	0	1	hsa-miR-148a-5p	-0.09	-0.09
EIF4E3	ENST00000425534.3	eukaryotic translation initiation factor 4E family member 3	475	5	0	5	0	6	hsa-miR-148a-5p	-0.09	-0.35
SIK1	ENST00000270162.6	salt-inducible kinase 1	2163	1	0	1	0	1	hsa-miR-148a-5p	-0.09	-0.09
DYRK1A	ENST00000339659.4	dual-specificity tyrosine-(Y)-phosphorylation regulated kinase 1A	448	1	0	1	0	2	hsa-miR-148a-5p	-0.09	-0.24
CITED2	ENST00000367651.2	Cbp/p300-interacting transactivator, with Glu/Asp-rich carboxy-terminal domain, 2	1071	1	0	1	0	1	hsa-miR-148a-5p	-0.09	-0.09
ZDHHC21	ENST00000380916.4	zinc finger, DHHC-type containing 21	196	2	0	1	1	0	hsa-miR-148a-5p	-0.09	-0.2
CDK6	ENST00000265734.4	cyclin-dependent kinase 6	1116	1	1	0	0	2	hsa-miR-148a-5p	-0.09	-0.09
IL18BP	ENST00000497194.2	interleukin 18 binding protein	41	2	0	1	1	1	hsa-miR-148a-5p	-0.09	-0.11
SLC23A2	ENST00000338244.1	solute carrier family 23 (ascorbic acid transporter), member 2	121	1	1	0	0	0	hsa-miR-148a-5p	-0.09	-0.09
ACVR1C	ENST00000243349.8	activin A receptor, type IC	27	1	1	0	0	2	hsa-miR-148a-5p	-0.09	-0.14
RPRM	ENST00000325926.3	reprimo, TP53 dependent G2 arrest mediator candidate	91	1	0	1	0	0	hsa-miR-148a-5p	-0.09	-0.09
LIF	ENST00000403987.3	leukemia inhibitory factor	55	2	1	1	0	0	hsa-miR-148a-5p	-0.09	-0.1
CTNNBIP1	ENST00000377263.1	catenin, beta interacting protein 1	493	1	0	1	0	0	hsa-miR-148a-5p	-0.09	-0.13
SRSF3	ENST00000373715.6	serine/arginine-rich splicing factor 3	2593	1	0	0	1	2	hsa-miR-148a-5p	-0.09	-0.14
SPRY2	ENST00000377102.1	sprouty homolog 2 (Drosophila)	139	1	0	1	0	0	hsa-miR-148a-5p	-0.09	-0.09
TCF15	ENST00000246080.3	transcription factor 15 (basic helix-loop-helix)	5	1	0	1	0	0	hsa-miR-148a-5p	-0.09	-0.09
C2orf83	ENST00000409066.1	chromosome 2 open reading frame 83	5	1	0	0	1	0	hsa-miR-148a-5p	-0.09	-0.09
ELP4	ENST00000395934.2	elongator acetyltransferase complex subunit 4	282	1	0	1	0	0	hsa-miR-148a-5p	-0.09	-0.11
MIER1	ENST00000357692.2	mesoderm induction early response 1, transcriptional regulator	950	1	0	1	0	1	hsa-miR-148a-5p	-0.09	-0.12
P2RX6	ENST00000402329.3	purinergic receptor P2X, ligand-gated ion channel, 6	10	1	0	1	0	0	hsa-miR-148a-5p	-0.09	-0.09
SLC16A9	ENST00000395348.3	solute carrier family 16, member 9	7	1	0	1	0	0	hsa-miR-148a-5p	-0.09	-0.09
HIAT1	ENST00000370152.3	hippocampus abundant transcript 1	1473	1	0	0	1	0	hsa-miR-148a-5p	-0.09	-0.09
DOCK10	ENST00000409592.3	dedicator of cytokinesis 10	19	1	0	1	0	0	hsa-miR-148a-5p	-0.09	-0.09
PIK3CD	ENST00000536656.1	phosphatidylinositol-4,5-bisphosphate 3-kinase, catalytic subunit delta	5	1	0	1	0	0	hsa-miR-148a-5p	-0.09	-0.09
HSD3B2	ENST00000543831.1	hydroxy-delta-5-steroid dehydrogenase, 3 beta- and steroid delta-isomerase 2	5	1	0	1	0	0	hsa-miR-148a-5p	-0.09	-0.09
CCDC88A	ENST00000336838.6	coiled-coil domain containing 88A	141	3	0	2	1	0	hsa-miR-148a-5p	-0.09	-0.2
TSHZ3	ENST00000240587.4	teashirt zinc finger homeobox 3	81	1	0	1	0	1	hsa-miR-148a-5p	-0.09	-0.12
SGCB	ENST00000381431.5	sarcoglycan, beta (43kDa dystrophin-associated glycoprotein)	1795	1	0	1	0	0	hsa-miR-148a-5p	-0.09	-0.15
STAG2	ENST00000371160.1	stromal antigen 2	216	1	0	1	0	0	hsa-miR-148a-5p	-0.09	-0.09
MSANTD3	ENST00000395067.2	Myb/SANT-like DNA-binding domain containing 3	78	3	1	2	0	1	hsa-miR-148a-5p	-0.09	-0.17
GTF2A1	ENST00000553612.1	general transcription factor IIA, 1, 19/37kDa	88	1	1	0	0	1	hsa-miR-148a-5p	-0.09	-0.14
ZNF215	ENST00000414517.2	zinc finger protein 215	24	1	0	0	1	0	hsa-miR-148a-5p	-0.09	-0.09
CCR2	ENST00000400888.2	chemokine (C-C motif) receptor 2	5	1	0	1	0	0	hsa-miR-148a-5p	-0.09	-0.09
ALDH1A2	ENST00000249750.4	aldehyde dehydrogenase 1 family, member A2	401	1	0	1	0	0	hsa-miR-148a-5p	-0.09	-0.09
SYNM	ENST00000560674.1	synemin, intermediate filament protein	36	1	0	1	0	0	hsa-miR-148a-5p	-0.09	-0.12
C1orf220	ENST00000319387.2	chromosome 1 open reading frame 220	5	1	0	1	0	0	hsa-miR-148a-5p	-0.09	-0.09
FAM3C	ENST00000359943.3	family with sequence similarity 3, member C	15	1	0	1	0	1	hsa-miR-148a-5p	-0.09	-0.12
IKBIP	ENST00000299157.4	IKBKB interacting protein	183	2	0	1	1	0	hsa-miR-148a-5p	-0.09	-0.15
HMGB1	ENST00000399489.1	high mobility group box 1	800	1	1	0	0	0	hsa-miR-148a-5p	-0.09	-0.23
MYBL1	ENST00000522677.3	v-myb avian myeloblastosis viral oncogene homolog-like 1	53	1	0	1	0	1	hsa-miR-148a-5p	-0.09	-0.09
DPAGT1	ENST00000409993.2	dolichyl-phosphate (UDP-N-acetylglucosamine) N-acetylglucosaminephosphotransferase 1 (GlcNAc-1-P transferase)	936	1	0	1	0	0	hsa-miR-148a-5p	-0.09	-0.09
BCAS1	ENST00000371440.3	breast carcinoma amplified sequence 1	0	2	0	0	2	1	hsa-miR-148a-5p	-0.09	-0.09
CLEC4M	ENST00000357361.2	C-type lectin domain family 4, member M	5	1	0	1	0	0	hsa-miR-148a-5p	-0.09	-0.09
CLEC1A	ENST00000315330.4	C-type lectin domain family 1, member A	5	1	0	1	0	0	hsa-miR-148a-5p	-0.09	-0.09
PSMG4	ENST00000473000.2	proteasome (prosome, macropain) assembly chaperone 4	1452	1	0	1	0	0	hsa-miR-148a-5p	-0.08	-0.09
ARL10	ENST00000310389.5	ADP-ribosylation factor-like 10	236	3	0	1	2	2	hsa-miR-148a-5p	-0.08	-0.1
NLGN1	ENST00000457714.1	neuroligin 1	36	2	0	2	0	1	hsa-miR-148a-5p	-0.08	-0.09
ALDH3A2	ENST00000339618.4	aldehyde dehydrogenase 3 family, member A2	940	1	1	0	0	1	hsa-miR-148a-5p	-0.08	-0.13
ZNF791	ENST00000446165.1	zinc finger protein 791	242	1	0	1	0	0	hsa-miR-148a-5p	-0.08	-0.09
ZNF256	ENST00000598928.1	zinc finger protein 256	18	1	1	0	0	0	hsa-miR-148a-5p	-0.08	-0.26
KLHL1	ENST00000377844.4	kelch-like family member 1	40	1	0	1	0	0	hsa-miR-148a-5p	-0.08	-0.08
DLX3	ENST00000434704.2	distal-less homeobox 3	5	1	0	1	0	0	hsa-miR-148a-5p	-0.08	-0.08
ACAA2	ENST00000285093.10	acetyl-CoA acyltransferase 2	189	1	0	1	0	0	hsa-miR-148a-5p	-0.08	-0.14
CXADR	ENST00000356275.6	coxsackie virus and adenovirus receptor	56	2	0	1	1	0	hsa-miR-148a-5p	-0.08	-0.15
ABCF2	ENST00000287844.2	ATP-binding cassette, sub-family F (GCN20), member 2	48	1	0	1	0	1	hsa-miR-148a-5p	-0.08	-0.12
TIMP2	ENST00000585421.1	TIMP metallopeptidase inhibitor 2	3147	1	0	1	0	0	hsa-miR-148a-5p	-0.08	-0.09
CREB1	ENST00000432329.2	cAMP responsive element binding protein 1	295	2	0	2	0	0	hsa-miR-148a-5p	-0.08	-0.1
UBXN7	ENST00000296328.4	UBX domain protein 7	95	2	1	1	0	2	hsa-miR-148a-5p	-0.08	-0.12
OAZ2	ENST00000560258.2	ornithine decarboxylase antizyme 2	2429	1	0	1	0	0	hsa-miR-148a-5p	-0.08	-0.08
PLD5	ENST00000536534.2	phospholipase D family, member 5	5	2	0	2	0	2	hsa-miR-148a-5p	-0.08	-0.08
GLIS1	ENST00000312233.2	GLIS family zinc finger 1	40	1	0	1	0	0	hsa-miR-148a-5p	-0.08	-0.08
PAQR3	ENST00000512733.1	progestin and adipoQ receptor family member III	217	2	0	2	0	1	hsa-miR-148a-5p	-0.08	-0.19
MLK4	ENST00000366624.3	Mitogen-activated protein kinase kinase kinase MLK4	405	1	0	1	0	0	hsa-miR-148a-5p	-0.08	-0.09
PTPRG	ENST00000474889.1	protein tyrosine phosphatase, receptor type, G	696	1	0	1	0	1	hsa-miR-148a-5p	-0.08	-0.09
PDP2	ENST00000311765.2	pyruvate dehyrogenase phosphatase catalytic subunit 2	102	2	0	1	1	1	hsa-miR-148a-5p	-0.08	-0.09
VWC2	ENST00000340652.4	von Willebrand factor C domain containing 2	5	2	0	2	0	1	hsa-miR-148a-5p	-0.08	-0.08
ATP2B2	ENST00000352432.4	ATPase, Ca++ transporting, plasma membrane 2	170	2	0	2	0	1	hsa-miR-148a-5p	-0.08	-0.08
INTS9	ENST00000521022.1	integrator complex subunit 9	85	1	0	1	0	0	hsa-miR-148a-5p	-0.08	-0.08
RBBP4	ENST00000373493.5	retinoblastoma binding protein 4	486	3	0	2	1	1	hsa-miR-148a-5p	-0.08	-0.09
PCGF5	ENST00000336126.5	polycomb group ring finger 5	176	2	0	1	1	1	hsa-miR-148a-5p	-0.08	-0.13
DCAF12	ENST00000361264.4	DDB1 and CUL4 associated factor 12	2075	1	0	1	0	0	hsa-miR-148a-5p	-0.08	-0.08
ELOVL5	ENST00000370918.4	ELOVL fatty acid elongase 5	2233	1	0	1	0	0	hsa-miR-148a-5p	-0.08	-0.08
FTO	ENST00000471389.1	fat mass and obesity associated	240	2	1	0	1	1	hsa-miR-148a-5p	-0.08	-0.09
PCDHB16	ENST00000361016.2	protocadherin beta 16	36	1	0	1	0	0	hsa-miR-148a-5p	-0.08	-0.08
ACSL6	ENST00000379264.2	acyl-CoA synthetase long-chain family member 6	7	1	0	1	0	0	hsa-miR-148a-5p	-0.08	-0.11
RBM8A	ENST00000330165.8	RNA binding motif protein 8A	33	1	0	0	1	1	hsa-miR-148a-5p	-0.08	-0.08
TMEM246	ENST00000374847.1	transmembrane protein 246	367	1	0	1	0	0	hsa-miR-148a-5p	-0.08	-0.11
KIAA0922	ENST00000409663.3	KIAA0922	313	2	0	1	1	0	hsa-miR-148a-5p	-0.08	-0.16
TFAP2A	ENST00000379613.3	transcription factor AP-2 alpha (activating enhancer binding protein 2 alpha)	367	1	0	1	0	1	hsa-miR-148a-5p	-0.08	-0.1
PHF20	ENST00000439301.1	PHD finger protein 20	191	1	0	1	0	1	hsa-miR-148a-5p	-0.08	-0.08
KCNQ3	ENST00000388996.4	potassium voltage-gated channel, KQT-like subfamily, member 3	5	4	1	2	1	3	hsa-miR-148a-5p	-0.08	-0.08
CDC40	ENST00000368932.1	cell division cycle 40	741	1	0	1	0	0	hsa-miR-148a-5p	-0.08	-0.08
GJB6	ENST00000241124.6	gap junction protein, beta 6, 30kDa	5	1	0	0	1	0	hsa-miR-148a-5p	-0.08	-0.08
FAM83F	ENST00000333407.6	family with sequence similarity 83, member F	5	4	1	2	1	1	hsa-miR-148a-5p	-0.08	-0.08
KLHL14	ENST00000359358.4	kelch-like family member 14	66	1	1	0	0	0	hsa-miR-148a-5p	-0.08	-0.08
STK17B	ENST00000263955.4	serine/threonine kinase 17b	113	1	0	0	1	0	hsa-miR-148a-5p	-0.08	-0.08
FBXO27	ENST00000292853.4	F-box protein 27	53	1	0	0	1	0	hsa-miR-148a-5p	-0.08	-0.08
TMEM239	ENST00000361033.1	transmembrane protein 239	5	2	0	2	0	0	hsa-miR-148a-5p	-0.08	-0.08
STAT1	ENST00000540176.1	signal transducer and activator of transcription 1, 91kDa	326	1	0	1	0	1	hsa-miR-148a-5p	-0.08	-0.08
ADAT1	ENST00000307921.3	adenosine deaminase, tRNA-specific 1	597	1	0	0	1	1	hsa-miR-148a-5p	-0.08	-0.08
ZNF92	ENST00000328747.7	zinc finger protein 92	99	1	0	0	1	0	hsa-miR-148a-5p	-0.08	-0.16
KRBA2	ENST00000396267.1	KRAB-A domain containing 2	14	1	0	0	1	2	hsa-miR-148a-5p	-0.08	-0.12
TRPS1	ENST00000395715.3	trichorhinophalangeal syndrome I	94	2	0	2	0	1	hsa-miR-148a-5p	-0.08	-0.09
EPHA5	ENST00000273854.3	EPH receptor A5	48	1	0	1	0	2	hsa-miR-148a-5p	-0.08	-0.14
SYT14	ENST00000399639.2	synaptotagmin XIV	16	1	0	1	0	2	hsa-miR-148a-5p	-0.08	-0.1
SLC35F5	ENST00000245680.2	solute carrier family 35, member F5	136	2	0	2	0	0	hsa-miR-148a-5p	-0.08	-0.17
MTX3	ENST00000509852.1	metaxin 3	304	1	0	1	0	3	hsa-miR-148a-5p	-0.08	-0.08
SERP1	ENST00000239944.2	stress-associated endoplasmic reticulum protein 1	3242	1	0	0	1	0	hsa-miR-148a-5p	-0.08	-0.09
LRP2BP	ENST00000362004.3	LRP2 binding protein	5	1	0	1	0	1	hsa-miR-148a-5p	-0.08	-0.08
GLIPR1L2	ENST00000550916.1	GLI pathogenesis-related 1 like 2	5	1	0	0	1	0	hsa-miR-148a-5p	-0.08	-0.08
CMTR1	ENST00000373451.4	cap methyltransferase 1	109	1	0	0	1	1	hsa-miR-148a-5p	-0.08	-0.08
KCNMB1	ENST00000274629.4	potassium large conductance calcium-activated channel, subfamily M, beta member 1	5	1	0	1	0	0	hsa-miR-148a-5p	-0.08	-0.08
SRSF2	ENST00000392485.2	serine/arginine-rich splicing factor 2	9241	1	0	0	1	1	hsa-miR-148a-5p	-0.08	-0.09
ZNF292	ENST00000369577.3	zinc finger protein 292	230	1	0	1	0	0	hsa-miR-148a-5p	-0.08	-0.08
HIST1H2BK	ENST00000396891.4	histone cluster 1, H2bk	57	1	0	0	1	1	hsa-miR-148a-5p	-0.08	-0.18
CXorf23	ENST00000379687.3	chromosome X open reading frame 23	30	4	0	4	0	0	hsa-miR-148a-5p	-0.08	-0.16
SLC9A6	ENST00000370698.3	solute carrier family 9, subfamily A (NHE6, cation proton antiporter 6), member 6	547	2	1	0	1	1	hsa-miR-148a-5p	-0.08	-0.42
CLPX	ENST00000300107.3	caseinolytic mitochondrial matrix peptidase chaperone subunit	251	1	0	0	1	0	hsa-miR-148a-5p	-0.08	-0.1
LPPR4	ENST00000370185.3	Lipid phosphate phosphatase-related protein type 4	5	1	0	0	1	0	hsa-miR-148a-5p	-0.08	-0.08
FSHB	ENST00000417547.1	follicle stimulating hormone, beta polypeptide	5	1	0	0	1	0	hsa-miR-148a-5p	-0.08	-0.08
SLC4A5	ENST00000423644.1	solute carrier family 4 (sodium bicarbonate cotransporter), member 5	6	2	0	2	0	0	hsa-miR-148a-5p	-0.08	-0.08
TWISTNB	ENST00000222567.5	TWIST neighbor	133	1	0	0	1	1	hsa-miR-148a-5p	-0.08	-0.09
CALCRL	ENST00000392370.3	calcitonin receptor-like	18	2	1	0	1	0	hsa-miR-148a-5p	-0.08	-0.2
KIAA1524	ENST00000295746.8	KIAA1524	498	1	0	1	0	0	hsa-miR-148a-5p	-0.08	-0.1
PKIA	ENST00000396418.2	protein kinase (cAMP-dependent, catalytic) inhibitor alpha	542	3	1	2	0	3	hsa-miR-148a-5p	-0.08	-0.26
LRP12	ENST00000424843.2	low density lipoprotein receptor-related protein 12	378	2	0	0	2	2	hsa-miR-148a-5p	-0.08	-0.09
NEK9	ENST00000238616.5	NIMA-related kinase 9	733	3	0	3	0	1	hsa-miR-148a-5p	-0.08	-0.11
GPC6	ENST00000377047.4	glypican 6	410	1	0	1	0	3	hsa-miR-148a-5p	-0.08	-0.08
MITF	ENST00000328528.6	microphthalmia-associated transcription factor	593	1	0	0	1	0	hsa-miR-148a-5p	-0.08	-0.08
ACER3	ENST00000532485.1	alkaline ceramidase 3	295	2	1	1	0	0	hsa-miR-148a-5p	-0.08	-0.1
SLC31A1	ENST00000374212.4	solute carrier family 31 (copper transporter), member 1	171	1	0	1	0	1	hsa-miR-148a-5p	-0.08	-0.08
DLC1	ENST00000276297.4	deleted in liver cancer 1	970	1	0	1	0	0	hsa-miR-148a-5p	-0.08	-0.08
CHRM5	ENST00000383263.5	cholinergic receptor, muscarinic 5	5	1	0	0	1	0	hsa-miR-148a-5p	-0.08	-0.08
LIN7C	ENST00000278193.2	lin-7 homolog C (C. elegans)	1701	2	0	2	0	0	hsa-miR-148a-5p	-0.08	-0.11
CWC22	ENST00000410053.3	CWC22 spliceosome-associated protein homolog (S. cerevisiae)	16	1	0	1	0	1	hsa-miR-148a-5p	-0.08	-0.14
MTCP1	ENST00000369476.3	mature T-cell proliferation 1	18	1	0	1	0	0	hsa-miR-148a-5p	-0.08	-0.19
LDLRAD4	ENST00000399848.3	low density lipoprotein receptor class A domain containing 4	314	2	0	2	0	3	hsa-miR-148a-5p	-0.08	-0.15
YAF2	ENST00000327791.4	YY1 associated factor 2	413	2	0	0	2	0	hsa-miR-148a-5p	-0.08	-0.25
CNTN5	ENST00000524871.1	contactin 5	5	1	0	0	1	0	hsa-miR-148a-5p	-0.08	-0.08
PPM1A	ENST00000395076.4	protein phosphatase, Mg2+/Mn2+ dependent, 1A	412	1	0	1	0	0	hsa-miR-148a-5p	-0.08	-0.08
ATP6V1D	ENST00000554236.1	ATPase, H+ transporting, lysosomal 34kDa, V1 subunit D	1271	1	0	0	1	0	hsa-miR-148a-5p	-0.08	-0.08
PTPN7	ENST00000367279.4	protein tyrosine phosphatase, non-receptor type 7	5	1	0	0	1	0	hsa-miR-148a-5p	-0.08	-0.08
FHL1	ENST00000394155.2	four and a half LIM domains 1	239	1	0	0	1	1	hsa-miR-148a-5p	-0.08	-0.1
AP5S1	ENST00000379573.2	adaptor-related protein complex 5, sigma 1 subunit	492	2	0	1	1	0	hsa-miR-148a-5p	-0.08	-0.12
TIMM17A	ENST00000367287.4	translocase of inner mitochondrial membrane 17 homolog A (yeast)	5594	1	0	0	1	0	hsa-miR-148a-5p	-0.08	-0.11
AMOT	ENST00000304758.1	angiomotin	515	1	0	1	0	1	hsa-miR-148a-5p	-0.08	-0.08
RIT1	ENST00000368323.3	Ras-like without CAAX 1	192	2	0	2	0	0	hsa-miR-148a-5p	-0.08	-0.26
DDHD2	ENST00000397166.2	DDHD domain containing 2	961	1	0	0	1	0	hsa-miR-148a-5p	-0.08	-0.08
SCAMP1	ENST00000538629.1	secretory carrier membrane protein 1	816	1	0	1	0	2	hsa-miR-148a-5p	-0.08	-0.08
SLC30A5	ENST00000396591.3	solute carrier family 30 (zinc transporter), member 5	677	1	1	0	0	1	hsa-miR-148a-5p	-0.08	-0.22
RABL5	ENST00000517481.1	RAB, member RAS oncogene family-like 5	170	1	0	1	0	0	hsa-miR-148a-5p	-0.07	-0.07
KBTBD12	ENST00000405256.1	kelch repeat and BTB (POZ) domain containing 12	5	1	0	0	1	2	hsa-miR-148a-5p	-0.07	-0.07
RASSF2	ENST00000379400.3	Ras association (RalGDS/AF-6) domain family member 2	88	2	0	1	1	0	hsa-miR-148a-5p	-0.07	-0.08
CYS1	ENST00000381813.4	cystin 1	22	1	0	0	1	1	hsa-miR-148a-5p	-0.07	-0.15
SMIM13	ENST00000416247.2	small integral membrane protein 13	199	1	0	1	0	0	hsa-miR-148a-5p	-0.07	-0.18
SREK1IP1	ENST00000513458.4	SREK1-interacting protein 1	145	1	0	0	1	0	hsa-miR-148a-5p	-0.07	-0.1
SIRT2	ENST00000358931.5	sirtuin 2	25	1	0	1	0	0	hsa-miR-148a-5p	-0.07	-0.09
SLC41A2	ENST00000258538.3	solute carrier family 41 (magnesium transporter), member 2	224	1	1	0	0	0	hsa-miR-148a-5p	-0.07	-0.13
HIPK2	ENST00000406875.3	homeodomain interacting protein kinase 2	48	2	0	2	0	3	hsa-miR-148a-5p	-0.07	-0.07
LCT	ENST00000264162.2	lactase	8	1	0	0	1	0	hsa-miR-148a-5p	-0.07	-0.07
FOXO3	ENST00000343882.6	forkhead box O3	32	3	0	2	1	0	hsa-miR-148a-5p	-0.07	-0.07
NSUN7	ENST00000316607.5	NOP2/Sun domain family, member 7	9	1	1	0	0	1	hsa-miR-148a-5p	-0.07	-0.07
TM4SF1	ENST00000472441.1	transmembrane 4 L six family member 1	1401	1	0	0	1	0	hsa-miR-148a-5p	-0.07	-0.07
FCRL4	ENST00000271532.1	Fc receptor-like 4	5	1	0	0	1	0	hsa-miR-148a-5p	-0.07	-0.07
RND3	ENST00000375734.2	Rho family GTPase 3	574	1	0	1	0	0	hsa-miR-148a-5p	-0.07	-0.09
AQP4	ENST00000383168.4	aquaporin 4	10	1	1	0	0	0	hsa-miR-148a-5p	-0.07	-0.1
SLC30A7	ENST00000370112.4	solute carrier family 30 (zinc transporter), member 7	204	3	0	3	0	0	hsa-miR-148a-5p	-0.07	-0.2
TCEAL7	ENST00000332431.4	transcription elongation factor A (SII)-like 7	15	1	0	1	0	0	hsa-miR-148a-5p	-0.07	-0.24
HRK	ENST00000257572.5	harakiri, BCL2 interacting protein (contains only BH3 domain)	19	1	0	0	1	1	hsa-miR-148a-5p	-0.07	-0.07
IL36RN	ENST00000346807.3	interleukin 36 receptor antagonist	5	1	0	0	1	0	hsa-miR-148a-5p	-0.07	-0.07
NALCN	ENST00000251127.6	sodium leak channel, non-selective	5	1	0	0	1	0	hsa-miR-148a-5p	-0.07	-0.07
MRRF	ENST00000344641.3	mitochondrial ribosome recycling factor	85	1	0	1	0	0	hsa-miR-148a-5p	-0.07	-0.07
GPATCH3	ENST00000361720.5	G patch domain containing 3	11	1	0	1	0	0	hsa-miR-148a-5p	-0.07	-0.07
GPR176	ENST00000299092.3	G protein-coupled receptor 176	2683	1	0	0	1	0	hsa-miR-148a-5p	-0.07	-0.07
DUSP3	ENST00000226004.3	dual specificity phosphatase 3	836	1	0	1	0	0	hsa-miR-148a-5p	-0.07	-0.15
KMT2A	ENST00000534358.1	lysine (K)-specific methyltransferase 2A	1092	1	0	1	0	2	hsa-miR-148a-5p	-0.07	-0.07
HAL	ENST00000538703.1	histidine ammonia-lyase	472	1	0	1	0	1	hsa-miR-148a-5p	-0.07	-0.08
PANK2	ENST00000497424.1	pantothenate kinase 2	1244	1	0	0	1	2	hsa-miR-148a-5p	-0.07	-0.23
STAM2	ENST00000263904.4	signal transducing adaptor molecule (SH3 domain and ITAM motif) 2	296	1	0	1	0	0	hsa-miR-148a-5p	-0.07	-0.07
SLC30A10	ENST00000366926.3	solute carrier family 30, member 10	66	3	0	2	1	1	hsa-miR-148a-5p	-0.07	-0.32
SLC25A40	ENST00000341119.5	solute carrier family 25, member 40	405	1	0	1	0	1	hsa-miR-148a-5p	-0.07	-0.09
PNP	ENST00000361505.5	purine nucleoside phosphorylase	50	2	0	2	0	0	hsa-miR-148a-5p	-0.07	-0.12
MRPS10	ENST00000053468.3	mitochondrial ribosomal protein S10	63	2	0	1	1	1	hsa-miR-148a-5p	-0.07	-0.12
KCNE1	ENST00000399289.3	potassium voltage-gated channel, Isk-related family, member 1	5	1	0	1	0	0	hsa-miR-148a-5p	-0.07	-0.07
SASS6	ENST00000287482.5	spindle assembly 6 homolog (C. elegans)	796	1	0	1	0	0	hsa-miR-148a-5p	-0.07	-0.07
PRKG1	ENST00000373985.1	protein kinase, cGMP-dependent, type I	12	1	0	1	0	0	hsa-miR-148a-5p	-0.07	-0.07
SCN3B	ENST00000392770.2	sodium channel, voltage-gated, type III, beta subunit	10	1	0	1	0	2	hsa-miR-148a-5p	-0.07	-0.07
TRMT6	ENST00000203001.2	tRNA methyltransferase 6 homolog (S. cerevisiae)	684	1	0	1	0	0	hsa-miR-148a-5p	-0.07	-0.11
ZRANB2	ENST00000254821.6	zinc finger, RAN-binding domain containing 2	4196	1	0	1	0	1	hsa-miR-148a-5p	-0.07	-0.07
CLIP1	ENST00000361654.4	CAP-GLY domain containing linker protein 1	17	1	0	1	0	0	hsa-miR-148a-5p	-0.07	-0.12
C9orf41	ENST00000376834.3	chromosome 9 open reading frame 41	248	1	0	0	1	0	hsa-miR-148a-5p	-0.07	-0.07
SPRY1	ENST00000394339.2	sprouty homolog 1, antagonist of FGF signaling (Drosophila)	150	1	0	0	1	2	hsa-miR-148a-5p	-0.07	-0.1
HAPLN1	ENST00000274341.4	hyaluronan and proteoglycan link protein 1	5	1	0	1	0	0	hsa-miR-148a-5p	-0.07	-0.07
TRPM7	ENST00000560955.1	transient receptor potential cation channel, subfamily M, member 7	281	1	1	0	0	0	hsa-miR-148a-5p	-0.07	-0.07
COL4A3	ENST00000396578.3	collagen, type IV, alpha 3 (Goodpasture antigen)	286	1	1	0	0	2	hsa-miR-148a-5p	-0.07	-0.07
ZNF354C	ENST00000315475.6	zinc finger protein 354C	482	1	0	0	1	1	hsa-miR-148a-5p	-0.07	-0.07
SYT4	ENST00000255224.3	synaptotagmin IV	11	1	0	0	1	1	hsa-miR-148a-5p	-0.07	-0.07
FAM45A	ENST00000361432.2	family with sequence similarity 45, member A	149	1	0	1	0	0	hsa-miR-148a-5p	-0.07	-0.07
RPS6KA2	ENST00000265678.4	ribosomal protein S6 kinase, 90kDa, polypeptide 2	1043	1	1	0	0	0	hsa-miR-148a-5p	-0.07	-0.07
TFPI	ENST00000392365.1	tissue factor pathway inhibitor (lipoprotein-associated coagulation inhibitor)	10747	1	0	1	0	0	hsa-miR-148a-5p	-0.07	-0.08
SKA3	ENST00000314759.5	spindle and kinetochore associated complex subunit 3	199	2	1	1	0	0	hsa-miR-148a-5p	-0.07	-0.2
PGAP1	ENST00000354764.4	post-GPI attachment to proteins 1	106	5	1	1	3	4	hsa-miR-148a-5p	-0.07	-0.1
ENY2	ENST00000520147.1	enhancer of yellow 2 homolog (Drosophila)	1814	1	1	0	0	1	hsa-miR-148a-5p	-0.07	-0.34
FAM211A	ENST00000409083.3	family with sequence similarity 211, member A	23	1	0	1	0	0	hsa-miR-148a-5p	-0.07	-0.13
TMEM181	ENST00000367090.3	transmembrane protein 181	924	2	0	1	1	0	hsa-miR-148a-5p	-0.07	-0.07
MICU3	ENST00000318063.5	mitochondrial calcium uptake family, member 3	9	1	0	0	1	0	hsa-miR-148a-5p	-0.07	-0.07
POU3F2	ENST00000328345.5	POU class 3 homeobox 2	274	1	0	0	1	1	hsa-miR-148a-5p	-0.07	-0.07
CLNS1A	ENST00000525428.1	chloride channel, nucleotide-sensitive, 1A	553	1	0	1	0	0	hsa-miR-148a-5p	-0.07	-0.07
NF2	ENST00000347330.5	neurofibromin 2 (merlin)	828	1	0	1	0	0	hsa-miR-148a-5p	-0.07	-0.07
NETO2	ENST00000562435.1	neuropilin (NRP) and tolloid (TLL)-like 2	723	1	0	0	1	1	hsa-miR-148a-5p	-0.07	-0.07
LATS2	ENST00000382592.4	large tumor suppressor kinase 2	464	1	0	0	1	0	hsa-miR-148a-5p	-0.07	-0.07
COA5	ENST00000328709.3	cytochrome c oxidase assembly factor 5	72	1	0	1	0	0	hsa-miR-148a-5p	-0.07	-0.1
H3F3B	ENST00000591890.1	H3 histone, family 3B (H3.3B)	336	1	0	0	1	0	hsa-miR-148a-5p	-0.07	-0.14
ZNF529	ENST00000334116.7	zinc finger protein 529	120	3	0	1	2	0	hsa-miR-148a-5p	-0.07	-0.15
IKZF2	ENST00000457361.1	IKAROS family zinc finger 2 (Helios)	32	2	1	1	0	1	hsa-miR-148a-5p	-0.07	-0.07
KIAA0513	ENST00000566428.1	KIAA0513	5	1	0	1	0	0	hsa-miR-148a-5p	-0.07	-0.07
RASGRP4	ENST00000586305.1	RAS guanyl releasing protein 4	5	1	0	1	0	0	hsa-miR-148a-5p	-0.07	-0.07
ZZZ3	ENST00000370801.3	zinc finger, ZZ-type containing 3	338	1	0	1	0	0	hsa-miR-148a-5p	-0.07	-0.07
FGF9	ENST00000382353.5	fibroblast growth factor 9	136	1	0	0	1	1	hsa-miR-148a-5p	-0.07	-0.07
BEST4	ENST00000372207.3	bestrophin 4	29	1	0	1	0	0	hsa-miR-148a-5p	-0.07	-0.07
RBM44	ENST00000316997.4	RNA binding motif protein 44	5	1	0	1	0	1	hsa-miR-148a-5p	-0.07	-0.07
SEC24D	ENST00000429811.2	SEC24 family, member D (S. cerevisiae)	50	1	0	1	0	0	hsa-miR-148a-5p	-0.07	-0.07
GNA13	ENST00000439174.2	guanine nucleotide binding protein (G protein), alpha 13	190	2	0	2	0	1	hsa-miR-148a-5p	-0.07	-0.07
CCNJL	ENST00000393977.3	cyclin J-like	66	1	0	1	0	0	hsa-miR-148a-5p	-0.07	-0.11
MOB3B	ENST00000262244.5	MOB kinase activator 3B	52	2	1	1	0	0	hsa-miR-148a-5p	-0.07	-0.17
CSGALNACT1	ENST00000454498.2	chondroitin sulfate N-acetylgalactosaminyltransferase 1	77	1	0	1	0	0	hsa-miR-148a-5p	-0.07	-0.07
GATA5	ENST00000252997.2	GATA binding protein 5	7	1	0	1	0	0	hsa-miR-148a-5p	-0.07	-0.07
AL590822.1	ENST00000545087.1	Uncharacterized protein	5	1	0	0	1	0	hsa-miR-148a-5p	-0.07	-0.07
LIMK2	ENST00000331728.4	LIM domain kinase 2	233	1	1	0	0	1	hsa-miR-148a-5p	-0.07	-0.07
YWHAG	ENST00000307630.3	tyrosine 3-monooxygenase/tryptophan 5-monooxygenase activation protein, gamma polypeptide	5623	1	0	1	0	0	hsa-miR-148a-5p	-0.07	-0.07
TRAPPC6B	ENST00000330149.5	trafficking protein particle complex 6B	69	1	0	1	0	0	hsa-miR-148a-5p	-0.07	-0.1
CNTNAP3	ENST00000297668.6	contactin associated protein-like 3	5	1	0	1	0	0	hsa-miR-148a-5p	-0.07	-0.07
LUZP2	ENST00000533227.1	leucine zipper protein 2	33	1	0	0	1	1	hsa-miR-148a-5p	-0.07	-0.07
SPAST	ENST00000315285.3	spastin	239	2	0	2	0	1	hsa-miR-148a-5p	-0.07	-0.09
TFAP2E	ENST00000373235.3	transcription factor AP-2 epsilon (activating enhancer binding protein 2 epsilon)	7	1	0	1	0	0	hsa-miR-148a-5p	-0.07	-0.07
TREML2	ENST00000483722.1	triggering receptor expressed on myeloid cells-like 2	5	1	1	0	0	2	hsa-miR-148a-5p	-0.07	-0.07
SNURF	ENST00000338094.6	SNRPN upstream reading frame protein	114	1	0	1	0	0	hsa-miR-148a-5p	-0.07	-0.07
ALX4	ENST00000329255.3	ALX homeobox 4	52	2	1	1	0	1	hsa-miR-148a-5p	-0.07	-0.07
B3GNT4	ENST00000546192.1	UDP-GlcNAc:betaGal beta-1,3-N-acetylglucosaminyltransferase 4	9	1	0	0	1	0	hsa-miR-148a-5p	-0.07	-0.08
ZNF780A	ENST00000450241.2	zinc finger protein 780A	44	1	0	1	0	0	hsa-miR-148a-5p	-0.07	-0.07
VTA1	ENST00000367630.4	vesicle (multivesicular body) trafficking 1	1424	1	0	0	1	3	hsa-miR-148a-5p	-0.07	-0.1
MRPL50	ENST00000374865.4	mitochondrial ribosomal protein L50	56	1	0	1	0	1	hsa-miR-148a-5p	-0.07	-0.08
RPF1	ENST00000370654.5	ribosome production factor 1 homolog (S. cerevisiae)	1192	1	1	0	0	1	hsa-miR-148a-5p	-0.07	-0.34
ECD	ENST00000372979.4	ecdysoneless homolog (Drosophila)	179	1	1	0	0	0	hsa-miR-148a-5p	-0.07	-0.32
GPR160	ENST00000355897.5	G protein-coupled receptor 160	22	1	1	0	0	0	hsa-miR-148a-5p	-0.07	-0.23
MAF	ENST00000393350.1	v-maf avian musculoaponeurotic fibrosarcoma oncogene homolog	608	2	0	2	0	0	hsa-miR-148a-5p	-0.07	-0.07
PDE4D	ENST00000340635.6	phosphodiesterase 4D, cAMP-specific	747	2	0	1	1	3	hsa-miR-148a-5p	-0.07	-0.07
ENTPD5	ENST00000334696.6	ectonucleoside triphosphate diphosphohydrolase 5	105	2	0	0	2	0	hsa-miR-148a-5p	-0.07	-0.07
PHACTR2	ENST00000427704.2	phosphatase and actin regulator 2	274	2	1	0	1	0	hsa-miR-148a-5p	-0.07	-0.07
ANGPTL3	ENST00000371129.3	angiopoietin-like 3	59	1	0	0	1	2	hsa-miR-148a-5p	-0.07	-0.1
RTN4RL1	ENST00000331238.6	reticulon 4 receptor-like 1	82	1	0	1	0	0	hsa-miR-148a-5p	-0.07	-0.07
OSCAR	ENST00000391761.1	osteoclast associated, immunoglobulin-like receptor	5	1	0	1	0	0	hsa-miR-148a-5p	-0.07	-0.07
NFKBIZ	ENST00000394054.2	nuclear factor of kappa light polypeptide gene enhancer in B-cells inhibitor, zeta	236	1	0	0	1	0	hsa-miR-148a-5p	-0.06	-0.07
RANGRF	ENST00000439238.3	RAN guanine nucleotide release factor	396	1	0	1	0	0	hsa-miR-148a-5p	-0.06	-0.07
RP1-170O19.20	ENST00000470747.4	Uncharacterized protein	151	2	0	1	1	1	hsa-miR-148a-5p	-0.06	-0.17
TRIM23	ENST00000231524.9	tripartite motif containing 23	247	1	0	1	0	2	hsa-miR-148a-5p	-0.06	-0.09
ZNF281	ENST00000294740.3	zinc finger protein 281	595	1	0	1	0	2	hsa-miR-148a-5p	-0.06	-0.16
FRRS1L	ENST00000561981.2	ferric-chelate reductase 1-like	11	2	0	2	0	3	hsa-miR-148a-5p	-0.06	-0.06
POU5F1B	ENST00000465342.2	POU class 5 homeobox 1B	5	1	0	0	1	1	hsa-miR-148a-5p	-0.06	-0.06
MBNL1	ENST00000357472.3	muscleblind-like splicing regulator 1	135	1	0	1	0	0	hsa-miR-148a-5p	-0.06	-0.06
CSF2RB	ENST00000403662.3	colony stimulating factor 2 receptor, beta, low-affinity (granulocyte-macrophage)	5	1	0	1	0	0	hsa-miR-148a-5p	-0.06	-0.06
KIAA1551	ENST00000312561.4	KIAA1551	15	1	0	1	0	0	hsa-miR-148a-5p	-0.06	-0.06
ANKRD40	ENST00000285243.6	ankyrin repeat domain 40	409	1	0	0	1	0	hsa-miR-148a-5p	-0.06	-0.06
GOLGA7B	ENST00000370602.1	golgin A7 family, member B	5	2	0	2	0	0	hsa-miR-148a-5p	-0.06	-0.08
ABCG2	ENST00000515655.1	ATP-binding cassette, sub-family G (WHITE), member 2	20	2	1	1	0	3	hsa-miR-148a-5p	-0.06	-0.23
GTF2H3	ENST00000543341.2	general transcription factor IIH, polypeptide 3, 34kDa	718	1	1	0	0	0	hsa-miR-148a-5p	-0.06	-0.07
MPDZ	ENST00000319217.7	multiple PDZ domain protein	341	1	0	0	1	1	hsa-miR-148a-5p	-0.06	-0.07
ZNF641	ENST00000301042.3	zinc finger protein 641	87	1	0	1	0	1	hsa-miR-148a-5p	-0.06	-0.09
MAPK13	ENST00000373766.5	mitogen-activated protein kinase 13	499	2	0	2	0	2	hsa-miR-148a-5p	-0.06	-0.07
SH3D19	ENST00000409598.4	SH3 domain containing 19	245	1	0	1	0	1	hsa-miR-148a-5p	-0.06	-0.16
ACSF3	ENST00000317447.4	acyl-CoA synthetase family member 3	40	1	0	0	1	0	hsa-miR-148a-5p	-0.06	-0.08
TAF8	ENST00000372977.3	TAF8 RNA polymerase II, TATA box binding protein (TBP)-associated factor, 43kDa	135	3	0	1	2	0	hsa-miR-148a-5p	-0.06	-0.08
LCOR	ENST00000371103.3	ligand dependent nuclear receptor corepressor	94	1	0	1	0	1	hsa-miR-148a-5p	-0.06	-0.07
KLF12	ENST00000377669.2	Kruppel-like factor 12	251	3	0	2	1	1	hsa-miR-148a-5p	-0.06	-0.07
HNRNPUL1	ENST00000352456.3	heterogeneous nuclear ribonucleoprotein U-like 1	11882	1	0	1	0	1	hsa-miR-148a-5p	-0.06	-0.08
PPP1R15B	ENST00000367188.4	protein phosphatase 1, regulatory subunit 15B	2154	2	0	1	1	0	hsa-miR-148a-5p	-0.06	-0.09
MTDH	ENST00000336273.3	metadherin	5192	1	0	1	0	0	hsa-miR-148a-5p	-0.06	-0.06
GNAQ	ENST00000286548.4	guanine nucleotide binding protein (G protein), q polypeptide	47	3	0	1	2	0	hsa-miR-148a-5p	-0.06	-0.06
ITGA6	ENST00000375221.2	integrin, alpha 6	1328	1	0	1	0	1	hsa-miR-148a-5p	-0.06	-0.06
LIN28B	ENST00000345080.4	lin-28 homolog B (C. elegans)	118	1	0	1	0	0	hsa-miR-148a-5p	-0.06	-0.06
ZBTB43	ENST00000449886.1	zinc finger and BTB domain containing 43	396	1	1	0	0	1	hsa-miR-148a-5p	-0.06	-0.06
GIT1	ENST00000579937.1	G protein-coupled receptor kinase interacting ArfGAP 1	18	1	0	0	1	0	hsa-miR-148a-5p	-0.06	-0.09
PHF7	ENST00000327906.3	PHD finger protein 7	38	1	0	1	0	0	hsa-miR-148a-5p	-0.06	-0.12
HERC4	ENST00000277817.6	HECT and RLD domain containing E3 ubiquitin protein ligase 4	1138	1	1	0	0	1	hsa-miR-148a-5p	-0.06	-0.22
NRG1	ENST00000341377.5	neuregulin 1	113	1	0	0	1	0	hsa-miR-148a-5p	-0.06	-0.07
AL953854.2	ENST00000438517.1		5	1	0	1	0	0	hsa-miR-148a-5p	-0.06	-0.06
ADAMTS3	ENST00000286657.4	ADAM metallopeptidase with thrombospondin type 1 motif, 3	5	2	0	2	0	0	hsa-miR-148a-5p	-0.06	-0.06
ANGPT2	ENST00000325203.5	angiopoietin 2	5	1	0	1	0	0	hsa-miR-148a-5p	-0.06	-0.06
ZNF484	ENST00000395505.2	zinc finger protein 484	22	1	0	0	1	0	hsa-miR-148a-5p	-0.06	-0.06
BCL2L11	ENST00000393256.3	BCL2-like 11 (apoptosis facilitator)	105	1	1	0	0	0	hsa-miR-148a-5p	-0.06	-0.07
RPS23	ENST00000296674.8	ribosomal protein S23	832	1	0	1	0	1	hsa-miR-148a-5p	-0.06	-0.37
RPL9	ENST00000295955.9	ribosomal protein L9	815	2	0	2	0	0	hsa-miR-148a-5p	-0.06	-0.29
PAXIP1	ENST00000404141.1	PAX interacting (with transcription-activation domain) protein 1	19	1	0	0	1	0	hsa-miR-148a-5p	-0.06	-0.19
MASTL	ENST00000342386.6	microtubule associated serine/threonine kinase-like	317	1	1	0	0	1	hsa-miR-148a-5p	-0.06	-0.15
ALG6	ENST00000371108.4	ALG6, alpha-1,3-glucosyltransferase	140	1	0	0	1	1	hsa-miR-148a-5p	-0.06	-0.11
TRIM59	ENST00000309784.4	tripartite motif containing 59	10	1	0	1	0	0	hsa-miR-148a-5p	-0.06	-0.1
CIAPIN1	ENST00000565961.1	cytokine induced apoptosis inhibitor 1	423	1	0	0	1	0	hsa-miR-148a-5p	-0.06	-0.06
BMPR1A	ENST00000372037.3	bone morphogenetic protein receptor, type IA	125	3	0	3	0	2	hsa-miR-148a-5p	-0.06	-0.13
JAM2	ENST00000480456.1	junctional adhesion molecule 2	41	1	0	1	0	3	hsa-miR-148a-5p	-0.06	-0.17
CLPP	ENST00000596605.1	caseinolytic mitochondrial matrix peptidase proteolytic subunit	4038	1	0	0	1	1	hsa-miR-148a-5p	-0.06	-0.14
CDC14A	ENST00000370125.2	cell division cycle 14A	123	1	0	1	0	2	hsa-miR-148a-5p	-0.06	-0.06
MAB21L3	ENST00000369500.3	mab-21-like 3 (C. elegans)	5	1	0	0	1	1	hsa-miR-148a-5p	-0.06	-0.06
KLHL3	ENST00000541417.1	kelch-like family member 3	40	1	0	1	0	2	hsa-miR-148a-5p	-0.06	-0.12
MEX3C	ENST00000592416.1	mex-3 RNA binding family member C	5	1	0	1	0	0	hsa-miR-148a-5p	-0.06	-0.06
RP11-863K10.7	ENST00000330539.1	Uncharacterized protein	5	1	0	1	0	0	hsa-miR-148a-5p	-0.06	-0.06
CCDC68	ENST00000591504.1	coiled-coil domain containing 68	72	1	0	0	1	0	hsa-miR-148a-5p	-0.06	-0.06
NUAK2	ENST00000367157.3	NUAK family, SNF1-like kinase, 2	213	1	0	1	0	0	hsa-miR-148a-5p	-0.06	-0.06
KIF27	ENST00000297814.2	kinesin family member 27	18	1	0	0	1	0	hsa-miR-148a-5p	-0.06	-0.08
FRA10AC1	ENST00000536233.1	fragile site, folic acid type, rare, fra(10)(q23.3) or fra(10)(q24.2) candidate 1	289	1	0	1	0	2	hsa-miR-148a-5p	-0.06	-0.12
SMIM19	ENST00000438528.3	small integral membrane protein 19	265	1	0	1	0	0	hsa-miR-148a-5p	-0.06	-0.13
SAMD8	ENST00000372687.4	sterile alpha motif domain containing 8	100	2	1	1	0	1	hsa-miR-148a-5p	-0.06	-0.12
GPN2	ENST00000374135.4	GPN-loop GTPase 2	97	1	0	1	0	1	hsa-miR-148a-5p	-0.06	-0.07
TMED6	ENST00000288025.3	transmembrane emp24 protein transport domain containing 6	8	1	0	0	1	0	hsa-miR-148a-5p	-0.06	-0.16
ZNF254	ENST00000357002.4	zinc finger protein 254	69	1	0	0	1	0	hsa-miR-148a-5p	-0.06	-0.07
FLT1	ENST00000282397.4	fms-related tyrosine kinase 1	7	1	0	1	0	0	hsa-miR-148a-5p	-0.06	-0.06
RTTN	ENST00000454359.1	rotatin	288	3	0	3	0	1	hsa-miR-148a-5p	-0.06	-0.06
CCDC148	ENST00000283233.5	coiled-coil domain containing 148	5	1	0	0	1	0	hsa-miR-148a-5p	-0.06	-0.06
BAHD1	ENST00000416165.1	bromo adjacent homology domain containing 1	76	2	0	1	1	0	hsa-miR-148a-5p	-0.06	-0.06
AC079210.1	ENST00000600820.1	Uncharacterized protein; cDNA FLJ45097 fis, clone BRAWH3031054	5	1	0	1	0	0	hsa-miR-148a-5p	-0.06	-0.06
UMODL1	ENST00000400424.2	uromodulin-like 1	5	1	0	0	1	0	hsa-miR-148a-5p	-0.06	-0.06
IKBKB	ENST00000379708.3	inhibitor of kappa light polypeptide gene enhancer in B-cells, kinase beta	806	1	0	1	0	0	hsa-miR-148a-5p	-0.06	-0.06
EIF4EBP2	ENST00000373218.4	eukaryotic translation initiation factor 4E binding protein 2	690	1	0	1	0	1	hsa-miR-148a-5p	-0.06	-0.08
ING4	ENST00000341550.4	inhibitor of growth family, member 4	548	1	0	1	0	1	hsa-miR-148a-5p	-0.06	-0.14
FAM212B	ENST00000357260.5	family with sequence similarity 212, member B	211	1	0	1	0	0	hsa-miR-148a-5p	-0.06	-0.07
HOXA9	ENST00000396345.1	homeobox A9	151	2	0	1	1	1	hsa-miR-148a-5p	-0.06	-0.16
FRS2	ENST00000550389.1	fibroblast growth factor receptor substrate 2	176	1	0	0	1	1	hsa-miR-148a-5p	-0.06	-0.07
TMEM30B	ENST00000555868.1	transmembrane protein 30B	10	1	0	1	0	1	hsa-miR-148a-5p	-0.06	-0.07
ERC1	ENST00000355446.5	ELKS/RAB6-interacting/CAST family member 1	159	1	0	0	1	2	hsa-miR-148a-5p	-0.06	-0.06
DNAJC27	ENST00000264711.2	DnaJ (Hsp40) homolog, subfamily C, member 27	41	1	0	0	1	0	hsa-miR-148a-5p	-0.06	-0.07
RORB	ENST00000376896.3	RAR-related orphan receptor B	5	2	0	1	1	0	hsa-miR-148a-5p	-0.06	-0.06
ZNF681	ENST00000402377.3	zinc finger protein 681	21	2	0	0	2	0	hsa-miR-148a-5p	-0.06	-0.09
CCNL2	ENST00000408952.5	cyclin L2	699	1	0	1	0	0	hsa-miR-148a-5p	-0.06	-0.14
ICK	ENST00000350082.5	intestinal cell (MAK-like) kinase	18	1	0	1	0	1	hsa-miR-148a-5p	-0.06	-0.07
ZNF195	ENST00000438262.2	zinc finger protein 195	389	1	0	1	0	0	hsa-miR-148a-5p	-0.06	-0.06
USP7	ENST00000344836.4	ubiquitin specific peptidase 7 (herpes virus-associated)	656	1	0	1	0	0	hsa-miR-148a-5p	-0.06	-0.06
BLOC1S5	ENST00000397457.2	biogenesis of lysosomal organelles complex-1, subunit 5, muted	187	1	0	0	1	1	hsa-miR-148a-5p	-0.06	-0.13
HAUS3	ENST00000243706.4	HAUS augmin-like complex, subunit 3	466	1	0	1	0	0	hsa-miR-148a-5p	-0.06	-0.13
ZNF699	ENST00000591998.1	zinc finger protein 699	5	1	0	0	1	1	hsa-miR-148a-5p	-0.06	-0.15
NMNAT1	ENST00000377205.1	nicotinamide nucleotide adenylyltransferase 1	72	1	0	1	0	2	hsa-miR-148a-5p	-0.06	-0.07
PDGFD	ENST00000393158.2	platelet derived growth factor D	52	1	1	0	0	0	hsa-miR-148a-5p	-0.06	-0.16
CTNNB1	ENST00000349496.5	catenin (cadherin-associated protein), beta 1, 88kDa	7257	1	0	1	0	1	hsa-miR-148a-5p	-0.06	-0.06
DNM3	ENST00000367731.1	dynamin 3	59	2	0	1	1	0	hsa-miR-148a-5p	-0.06	-0.06
NDUFA5	ENST00000471770.1	NADH dehydrogenase (ubiquinone) 1 alpha subcomplex, 5	28	1	0	1	0	2	hsa-miR-148a-5p	-0.06	-0.12
SSR3	ENST00000476217.1	signal sequence receptor, gamma (translocon-associated protein gamma)	6034	1	0	1	0	1	hsa-miR-148a-5p	-0.06	-0.07
ABL2	ENST00000502732.1	c-abl oncogene 2, non-receptor tyrosine kinase	892	4*	0	3	0	1	hsa-miR-148a-5p	-0.06	-0.06
SERPINB5	ENST00000382771.4	serpin peptidase inhibitor, clade B (ovalbumin), member 5	295	1	0	1	0	1	hsa-miR-148a-5p	-0.06	-0.14
OXTR	ENST00000316793.3	oxytocin receptor	24	1	0	1	0	1	hsa-miR-148a-5p	-0.06	-0.07
TMEM245	ENST00000374586.3	transmembrane protein 245	1320	3	0	3	0	0	hsa-miR-148a-5p	-0.06	-0.06
ARHGAP28	ENST00000419673.2	Rho GTPase activating protein 28	31	1	0	1	0	2	hsa-miR-148a-5p	-0.06	-0.06
TRIM62	ENST00000291416.5	tripartite motif containing 62	28	1	0	0	1	0	hsa-miR-148a-5p	-0.06	-0.06
SRPX2	ENST00000373004.3	sushi-repeat containing protein, X-linked 2	69	1	0	0	1	1	hsa-miR-148a-5p	-0.06	-0.1
ASB8	ENST00000317697.3	ankyrin repeat and SOCS box containing 8	70	1	0	1	0	0	hsa-miR-148a-5p	-0.06	-0.12
NAA25	ENST00000261745.4	N(alpha)-acetyltransferase 25, NatB auxiliary subunit	919	1	0	1	0	1	hsa-miR-148a-5p	-0.06	-0.1
GNE	ENST00000396594.3	glucosamine (UDP-N-acetyl)-2-epimerase/N-acetylmannosamine kinase	22	2	0	1	1	0	hsa-miR-148a-5p	-0.06	-0.06
MAML2	ENST00000524717.1	mastermind-like 2 (Drosophila)	104	1	0	1	0	1	hsa-miR-148a-5p	-0.06	-0.06
IL7R	ENST00000343305.4	interleukin 7 receptor	293	1	0	0	1	0	hsa-miR-148a-5p	-0.06	-0.06
ZNF492	ENST00000456783.2	zinc finger protein 492	5	1	0	0	1	0	hsa-miR-148a-5p	-0.06	-0.06
KIAA1257	ENST00000265068.5	KIAA1257	5	1	0	1	0	0	hsa-miR-148a-5p	-0.06	-0.06
NPAT	ENST00000278612.8	nuclear protein, ataxia-telangiectasia locus	163	2	0	1	1	0	hsa-miR-148a-5p	-0.06	-0.1
NLE1	ENST00000586869.1	notchless homolog 1 (Drosophila)	526	1	0	1	0	1	hsa-miR-148a-5p	-0.06	-0.07
ZC3H8	ENST00000409573.2	zinc finger CCCH-type containing 8	216	1	0	1	0	1	hsa-miR-148a-5p	-0.06	-0.15
MGAT5	ENST00000409645.1	mannosyl (alpha-1,6-)-glycoprotein beta-1,6-N-acetyl-glucosaminyltransferase	1627	2	0	1	1	2	hsa-miR-148a-5p	-0.06	-0.06
MYSM1	ENST00000472487.1	Myb-like, SWIRM and MPN domains 1	38	2	0	1	1	1	hsa-miR-148a-5p	-0.06	-0.23
SH3BGRL2	ENST00000369838.4	SH3 domain binding glutamic acid-rich protein like 2	32	1	0	1	0	1	hsa-miR-148a-5p	-0.06	-0.18
ZMYM2	ENST00000382869.3	zinc finger, MYM-type 2	172	2	0	1	1	0	hsa-miR-148a-5p	-0.06	-0.07
SMYD2	ENST00000366957.5	SET and MYND domain containing 2	1381	1	0	0	1	2	hsa-miR-148a-5p	-0.06	-0.08
AC007461.1	ENST00000602013.1	Uncharacterized protein	7	1	0	1	0	0	hsa-miR-148a-5p	-0.06	-0.19
PPP1CC	ENST00000335007.5	protein phosphatase 1, catalytic subunit, gamma isozyme	3739	1	0	0	1	1	hsa-miR-148a-5p	-0.06	-0.13
TRDN	ENST00000398178.3	triadin	5	1	0	0	1	0	hsa-miR-148a-5p	-0.06	-0.06
TOP2A	ENST00000423485.1	topoisomerase (DNA) II alpha 170kDa	9054	1	0	1	0	0	hsa-miR-148a-5p	-0.06	-0.06
TNFSF15	ENST00000374045.4	tumor necrosis factor (ligand) superfamily, member 15	29	1	0	1	0	1	hsa-miR-148a-5p	-0.06	-0.06
FAM171A1	ENST00000378116.4	family with sequence similarity 171, member A1	20	1	1	0	0	0	hsa-miR-148a-5p	-0.06	-0.06
KCNK10	ENST00000340700.5	potassium channel, subfamily K, member 10	5	1	0	1	0	0	hsa-miR-148a-5p	-0.06	-0.06
OTUD4	ENST00000454497.2	OTU domain containing 4	18	1	0	0	1	1	hsa-miR-148a-5p	-0.06	-0.06
PLEKHA2	ENST00000420274.1	pleckstrin homology domain containing, family A (phosphoinositide binding specific) member 2	3303	2	1	1	0	0	hsa-miR-148a-5p	-0.06	-0.06
DCLK1	ENST00000379892.4	doublecortin-like kinase 1	9	1	0	1	0	1	hsa-miR-148a-5p	-0.06	-0.06
PARP14	ENST00000474629.2	poly (ADP-ribose) polymerase family, member 14	502	1	0	0	1	1	hsa-miR-148a-5p	-0.06	-0.06
FAM196B	ENST00000377365.3	family with sequence similarity 196, member B	174	1	0	0	1	1	hsa-miR-148a-5p	-0.06	-0.06
MYO18A	ENST00000354329.4	myosin XVIIIA	159	1	0	1	0	1	hsa-miR-148a-5p	-0.05	-0.06
ONECUT2	ENST00000491143.2	one cut homeobox 2	847	3	1	1	1	2	hsa-miR-148a-5p	-0.05	-0.07
ESD	ENST00000378720.3	esterase D	28	1	0	1	0	0	hsa-miR-148a-5p	-0.05	-0.2
ZNF649	ENST00000354957.3	zinc finger protein 649	77	1	0	0	1	0	hsa-miR-148a-5p	-0.05	-0.12
TGOLN2	ENST00000377386.3	trans-golgi network protein 2	1914	2	0	2	0	2	hsa-miR-148a-5p	-0.05	-0.06
TMEM168	ENST00000312814.6	transmembrane protein 168	195	1	0	0	1	2	hsa-miR-148a-5p	-0.05	-0.14
OTUD3	ENST00000375120.3	OTU domain containing 3	438	1	0	0	1	1	hsa-miR-148a-5p	-0.05	-0.06
PTPN21	ENST00000328736.3	protein tyrosine phosphatase, non-receptor type 21	104	1	0	1	0	1	hsa-miR-148a-5p	-0.05	-0.06
UBE3A	ENST00000232165.3	ubiquitin protein ligase E3A	529	1	0	1	0	0	hsa-miR-148a-5p	-0.05	-0.06
RNASEH1	ENST00000315212.3	ribonuclease H1	212	1	0	1	0	0	hsa-miR-148a-5p	-0.05	-0.05
WDR26	ENST00000414423.2	WD repeat domain 26	1229	2	1	0	1	0	hsa-miR-148a-5p	-0.05	-0.22
C10orf118	ENST00000543782.1	chromosome 10 open reading frame 118	146	2	0	0	2	1	hsa-miR-148a-5p	-0.05	-0.06
PHLDA3	ENST00000367311.3	pleckstrin homology-like domain, family A, member 3	82	1	0	1	0	0	hsa-miR-148a-5p	-0.05	-0.12
ARL14EPL	ENST00000601302.2	ADP-ribosylation factor-like 14 effector protein-like	10	1	0	1	0	0	hsa-miR-148a-5p	-0.05	-0.11
ZNF285	ENST00000330997.4	zinc finger protein 285	31	1	0	1	0	1	hsa-miR-148a-5p	-0.05	-0.07
ACACA	ENST00000353139.5	acetyl-CoA carboxylase alpha	306	1	1	0	0	0	hsa-miR-148a-5p	-0.05	-0.07
CLUAP1	ENST00000576634.1	clusterin associated protein 1	99	1	0	0	1	2	hsa-miR-148a-5p	-0.05	-0.05
FITM2	ENST00000396825.3	fat storage-inducing transmembrane protein 2	215	1	0	1	0	0	hsa-miR-148a-5p	-0.05	-0.07
LHFPL2	ENST00000515007.2	lipoma HMGIC fusion partner-like 2	16	1	0	0	1	0	hsa-miR-148a-5p	-0.05	-0.05
NUPL1	ENST00000381736.3	nucleoporin like 1	268	1	0	1	0	2	hsa-miR-148a-5p	-0.05	-0.05
ZNF84	ENST00000392319.2	zinc finger protein 84	256	2	1	1	0	2	hsa-miR-148a-5p	-0.05	-0.11
PAH	ENST00000553106.1	phenylalanine hydroxylase	433	1	0	0	1	1	hsa-miR-148a-5p	-0.05	-0.13
INTU	ENST00000335251.6	inturned planar cell polarity protein	105	4	0	4	0	0	hsa-miR-148a-5p	-0.05	-0.08
MUC20	ENST00000320736.6	mucin 20, cell surface associated	11	2	1	0	1	0	hsa-miR-148a-5p	-0.05	-0.12
F11R	ENST00000368026.6	F11 receptor	2844	2	0	2	0	1	hsa-miR-148a-5p	-0.05	-0.07
CLUH	ENST00000570628.2	clustered mitochondria (cluA/CLU1) homolog	125	1	0	1	0	0	hsa-miR-148a-5p	-0.05	-0.06
LAT	ENST00000395461.3	linker for activation of T cells	41	1	1	0	0	0	hsa-miR-148a-5p	-0.05	-0.5
RCOR3	ENST00000367006.4	REST corepressor 3	374	1	0	0	1	0	hsa-miR-148a-5p	-0.05	-0.08
EDARADD	ENST00000359362.5	EDAR-associated death domain	76	2	0	2	0	1	hsa-miR-148a-5p	-0.05	-0.13
FMR1	ENST00000370471.3	fragile X mental retardation 1	1155	1	0	1	0	0	hsa-miR-148a-5p	-0.05	-0.08
PTBP3	ENST00000374257.1	polypyrimidine tract binding protein 3	214	2	0	1	1	0	hsa-miR-148a-5p	-0.05	-0.13
EVX2	ENST00000308618.4	even-skipped homeobox 2	9	1	0	1	0	1	hsa-miR-148a-5p	-0.05	-0.05
LRRTM4	ENST00000409911.1	leucine rich repeat transmembrane neuronal 4	5	1	0	1	0	0	hsa-miR-148a-5p	-0.05	-0.05
MAP4K3	ENST00000263881.3	mitogen-activated protein kinase kinase kinase kinase 3	796	1	0	0	1	0	hsa-miR-148a-5p	-0.05	-0.05
CNST	ENST00000366513.4	consortin, connexin sorting protein	303	1	1	0	0	0	hsa-miR-148a-5p	-0.05	-0.05
SENP7	ENST00000394095.2	SUMO1/sentrin specific peptidase 7	342	2	0	1	1	0	hsa-miR-148a-5p	-0.05	-0.05
PIF1	ENST00000268043.4	PIF1 5'-to-3' DNA helicase	19	1	0	0	1	0	hsa-miR-148a-5p	-0.05	-0.05
SOS1	ENST00000426016.1	son of sevenless homolog 1 (Drosophila)	189	2	0	2	0	1	hsa-miR-148a-5p	-0.05	-0.07
PNPLA8	ENST00000426128.2	patatin-like phospholipase domain containing 8	60	1	0	0	1	0	hsa-miR-148a-5p	-0.05	-0.09
ZNRF1	ENST00000335325.4	zinc and ring finger 1, E3 ubiquitin protein ligase	519	1	0	1	0	1	hsa-miR-148a-5p	-0.05	-0.05
TPP2	ENST00000376052.3	tripeptidyl peptidase II	240	1	0	1	0	0	hsa-miR-148a-5p	-0.05	-0.09
RPL37	ENST00000274242.5	ribosomal protein L37	1785	1	0	1	0	1	hsa-miR-148a-5p	-0.05	-0.06
MTHFR	ENST00000376592.1	methylenetetrahydrofolate reductase (NAD(P)H)	207	1	0	0	1	0	hsa-miR-148a-5p	-0.05	-0.05
LARGE	ENST00000354992.2	like-glycosyltransferase	411	1	0	1	0	1	hsa-miR-148a-5p	-0.05	-0.07
ABCD2	ENST00000308666.3	ATP-binding cassette, sub-family D (ALD), member 2	5	4	0	2	2	1	hsa-miR-148a-5p	-0.05	-0.1
RNF180	ENST00000389100.4	ring finger protein 180	18	1	0	1	0	0	hsa-miR-148a-5p	-0.05	-0.11
LILRB3	ENST00000391750.1	leukocyte immunoglobulin-like receptor, subfamily B (with TM and ITIM domains), member 3	5	1	0	0	1	1	hsa-miR-148a-5p	-0.05	-0.05
ABHD13	ENST00000375898.3	abhydrolase domain containing 13	479	1	0	1	0	1	hsa-miR-148a-5p	-0.05	-0.18
LYST	ENST00000389794.3	lysosomal trafficking regulator	9	1	0	1	0	0	hsa-miR-148a-5p	-0.05	-0.05
ZNF788	ENST00000430298.2	zinc finger family member 788	16	1	0	1	0	0	hsa-miR-148a-5p	-0.05	-0.05
PRAMEF14	ENST00000344998.3	PRAME family member 14	5	1	0	1	0	0	hsa-miR-148a-5p	-0.05	-0.05
RNF219	ENST00000282003.6	ring finger protein 219	680	1	0	1	0	0	hsa-miR-148a-5p	-0.05	-0.05
HS2ST1	ENST00000370550.5	heparan sulfate 2-O-sulfotransferase 1	787	1	0	0	1	1	hsa-miR-148a-5p	-0.05	-0.05
RBP3	ENST00000224600.4	retinol binding protein 3, interstitial	5	1	0	1	0	0	hsa-miR-148a-5p	-0.05	-0.05
SRSF10	ENST00000343255.5	serine/arginine-rich splicing factor 10	1920	1	0	1	0	1	hsa-miR-148a-5p	-0.05	-0.08
SYNJ2BP	ENST00000256366.4	synaptojanin 2 binding protein	329	1	0	1	0	1	hsa-miR-148a-5p	-0.05	-0.15
FAF1	ENST00000396153.2	Fas (TNFRSF6) associated factor 1	428	1	0	1	0	1	hsa-miR-148a-5p	-0.05	-0.12
C21orf90	ENST00000354333.5	chromosome 21 open reading frame 90	26	1	0	0	1	0	hsa-miR-148a-5p	-0.05	-0.1
DIDO1	ENST00000266070.4	death inducer-obliterator 1	1279	1	0	1	0	0	hsa-miR-148a-5p	-0.05	-0.05
ZNF415	ENST00000597503.1	zinc finger protein 415	38	1	0	0	1	0	hsa-miR-148a-5p	-0.05	-0.12
RSPRY1	ENST00000394420.4	ring finger and SPRY domain containing 1	735	1	0	1	0	0	hsa-miR-148a-5p	-0.05	-0.12
SGPP2	ENST00000321276.7	sphingosine-1-phosphate phosphatase 2	182	1	0	1	0	1	hsa-miR-148a-5p	-0.05	-0.08
CXorf38	ENST00000378426.1	chromosome X open reading frame 38	238	1	0	1	0	1	hsa-miR-148a-5p	-0.05	-0.05
AIG1	ENST00000357847.4	androgen-induced 1	1226	1	0	1	0	1	hsa-miR-148a-5p	-0.05	-0.07
C12orf23	ENST00000548125.1	chromosome 12 open reading frame 23	602	2	0	1	1	0	hsa-miR-148a-5p	-0.05	-0.14
CHRNB2	ENST00000368476.3	cholinergic receptor, nicotinic, beta 2 (neuronal)	16	2	0	2	0	0	hsa-miR-148a-5p	-0.05	-0.05
FAM65B	ENST00000259698.4	family with sequence similarity 65, member B	7	1	0	0	1	0	hsa-miR-148a-5p	-0.05	-0.05
PKHD1	ENST00000371117.3	polycystic kidney and hepatic disease 1 (autosomal recessive)	5	2	1	1	0	1	hsa-miR-148a-5p	-0.05	-0.05
EBF3	ENST00000368648.3	early B-cell factor 3	101	1	0	1	0	2	hsa-miR-148a-5p	-0.05	-0.05
IL1R1	ENST00000410023.1	interleukin 1 receptor, type I	1713	2	1	1	0	1	hsa-miR-148a-5p	-0.05	-0.05
ZNF558	ENST00000601372.1	zinc finger protein 558	24	1	1	0	0	1	hsa-miR-148a-5p	-0.05	-0.05
GLRA3	ENST00000274093.3	glycine receptor, alpha 3	5	3	1	0	2	1	hsa-miR-148a-5p	-0.05	-0.05
KSR2	ENST00000425217.1	kinase suppressor of ras 2	22	3	0	2	1	3	hsa-miR-148a-5p	-0.05	-0.05
SEMA6D	ENST00000355997.3	sema domain, transmembrane domain (TM), and cytoplasmic domain, (semaphorin) 6D	179	2	1	1	0	2	hsa-miR-148a-5p	-0.05	-0.05
NPFFR1	ENST00000277942.6	neuropeptide FF receptor 1	5	2	1	1	0	0	hsa-miR-148a-5p	-0.05	-0.05
IGF2BP3	ENST00000258729.3	insulin-like growth factor 2 mRNA binding protein 3	30	1	0	0	1	0	hsa-miR-148a-5p	-0.05	-0.05
GPR158	ENST00000376351.3	G protein-coupled receptor 158	5	2	1	1	0	0	hsa-miR-148a-5p	-0.05	-0.05
MBNL3	ENST00000370839.3	muscleblind-like splicing regulator 3	593	3	0	2	1	2	hsa-miR-148a-5p	-0.05	-0.06
IKZF5	ENST00000368886.5	IKAROS family zinc finger 5 (Pegasus)	83	1	0	1	0	1	hsa-miR-148a-5p	-0.05	-0.12
RRAGD	ENST00000369415.4	Ras-related GTP binding D	644	1	0	1	0	1	hsa-miR-148a-5p	-0.05	-0.07
DDI2	ENST00000480945.1	DNA-damage inducible 1 homolog 2 (S. cerevisiae)	357	4	1	1	2	2	hsa-miR-148a-5p	-0.05	-0.19
TSHZ2	ENST00000371497.5	teashirt zinc finger homeobox 2	351	3	0	2	1	0	hsa-miR-148a-5p	-0.05	-0.05
THYN1	ENST00000352327.5	thymocyte nuclear protein 1	116	1	0	1	0	0	hsa-miR-148a-5p	-0.05	-0.32
ZNF79	ENST00000342483.5	zinc finger protein 79	42	1	0	1	0	0	hsa-miR-148a-5p	-0.05	-0.09
ARVCF	ENST00000263207.3	armadillo repeat gene deleted in velocardiofacial syndrome	19	1	0	1	0	1	hsa-miR-148a-5p	-0.05	-0.07
ZKSCAN8	ENST00000330236.6	zinc finger with KRAB and SCAN domains 8	281	2	1	1	0	0	hsa-miR-148a-5p	-0.05	-0.05
PRDX6	ENST00000340385.5	peroxiredoxin 6	27834	2	0	2	0	1	hsa-miR-148a-5p	-0.05	-0.26
CXorf56	ENST00000320339.4	chromosome X open reading frame 56	279	1	0	0	1	0	hsa-miR-148a-5p	-0.05	-0.1
SLC6A15	ENST00000309283.7	solute carrier family 6 (neutral amino acid transporter), member 15	508	1	0	0	1	0	hsa-miR-148a-5p	-0.05	-0.05
PMP2	ENST00000256103.2	peripheral myelin protein 2	5	1	0	0	1	1	hsa-miR-148a-5p	-0.05	-0.05
PLEKHG2	ENST00000425673.1	pleckstrin homology domain containing, family G (with RhoGef domain) member 2	399	1	0	1	0	0	hsa-miR-148a-5p	-0.05	-0.05
TREML4	ENST00000341495.2	triggering receptor expressed on myeloid cells-like 4	5	1	0	1	0	0	hsa-miR-148a-5p	-0.05	-0.05
NFIB	ENST00000397575.3	nuclear factor I/B	1149	1	0	1	0	2	hsa-miR-148a-5p	-0.05	-0.05
LRIG3	ENST00000379141.4	leucine-rich repeats and immunoglobulin-like domains 3	366	1	1	0	0	4	hsa-miR-148a-5p	-0.05	-0.08
FAM129A	ENST00000367511.3	family with sequence similarity 129, member A	213	2	1	1	0	0	hsa-miR-148a-5p	-0.05	-0.05
ZER1	ENST00000291900.2	zyg-11 related, cell cycle regulator	336	1	1	0	0	0	hsa-miR-148a-5p	-0.05	-0.09
SPATA6	ENST00000371847.3	spermatogenesis associated 6	23	1	0	1	0	1	hsa-miR-148a-5p	-0.05	-0.07
PAK3	ENST00000372007.5	p21 protein (Cdc42/Rac)-activated kinase 3	8	2	1	1	0	2	hsa-miR-148a-5p	-0.05	-0.06
RAB32	ENST00000367495.3	RAB32, member RAS oncogene family	1894	1	0	1	0	3	hsa-miR-148a-5p	-0.05	-0.07
ZNF426	ENST00000253115.2	zinc finger protein 426	70	1	0	1	0	4	hsa-miR-148a-5p	-0.05	-0.05
FBXO28	ENST00000424254.2	F-box protein 28	461	1	0	0	1	1	hsa-miR-148a-5p	-0.05	-0.06
ELAVL2	ENST00000380110.4	ELAV like neuron-specific RNA binding protein 2	78	1	0	1	0	0	hsa-miR-148a-5p	-0.05	-0.05
S100PBP	ENST00000373475.5	S100P binding protein	428	1	0	0	1	0	hsa-miR-148a-5p	-0.05	-0.05
ATAD2B	ENST00000238789.5	ATPase family, AAA domain containing 2B	11	1	0	1	0	0	hsa-miR-148a-5p	-0.05	-0.05
CCR1	ENST00000296140.3	chemokine (C-C motif) receptor 1	10	1	0	1	0	1	hsa-miR-148a-5p	-0.05	-0.05
PANK1	ENST00000322191.6	pantothenate kinase 1	435	1	0	1	0	1	hsa-miR-148a-5p	-0.05	-0.07
HSPA6	ENST00000309758.4	heat shock 70kDa protein 6 (HSP70B')	27	1	0	1	0	2	hsa-miR-148a-5p	-0.05	-0.05
RNASEH2C	ENST00000308418.4	ribonuclease H2, subunit C	1330	1	0	1	0	0	hsa-miR-148a-5p	-0.05	-0.13
PRKG2	ENST00000395578.1	protein kinase, cGMP-dependent, type II	15	2	0	1	1	0	hsa-miR-148a-5p	-0.05	-0.07
MAPKAPK3	ENST00000446044.1	mitogen-activated protein kinase-activated protein kinase 3	155	1	0	0	1	1	hsa-miR-148a-5p	-0.05	-0.12
TBC1D14	ENST00000448507.1	TBC1 domain family, member 14	1583	1	0	1	0	0	hsa-miR-148a-5p	-0.05	-0.05
ATP8A1	ENST00000381668.5	ATPase, aminophospholipid transporter (APLT), class I, type 8A, member 1	48	2	0	2	0	0	hsa-miR-148a-5p	-0.05	-0.05
USP49	ENST00000394253.3	ubiquitin specific peptidase 49	44	1	1	0	0	0	hsa-miR-148a-5p	-0.05	-0.18
RPS6	ENST00000380394.4	ribosomal protein S6	380	3	1	0	2	0	hsa-miR-148a-5p	-0.05	-0.22
GRPEL2	ENST00000416916.2	GrpE-like 2, mitochondrial (E. coli)	79	1	0	0	1	0	hsa-miR-148a-5p	-0.05	-0.06
SNTG1	ENST00000522124.1	syntrophin, gamma 1	5	4	0	2	2	2	hsa-miR-148a-5p	-0.05	-0.16
PPP4R1L	ENST00000334187.8	protein phosphatase 4, regulatory subunit 1-like	27	2	1	1	0	1	hsa-miR-148a-5p	-0.05	-0.07
ZNF878	ENST00000547628.1	zinc finger protein 878	17	1	0	1	0	0	hsa-miR-148a-5p	-0.05	-0.05
FAM110D	ENST00000374268.3	family with sequence similarity 110, member D	5	1	0	1	0	0	hsa-miR-148a-5p	-0.05	-0.05
SEL1L	ENST00000336735.4	sel-1 suppressor of lin-12-like (C. elegans)	1271	1	0	1	0	1	hsa-miR-148a-5p	-0.05	-0.05
GRIP1	ENST00000398016.3	glutamate receptor interacting protein 1	28	2	0	2	0	0	hsa-miR-148a-5p	-0.05	-0.05
DDR1	ENST00000446312.1	discoidin domain receptor tyrosine kinase 1	195	1	0	1	0	0	hsa-miR-148a-5p	-0.05	-0.05
PSD3	ENST00000327040.8	pleckstrin and Sec7 domain containing 3	133	2	1	1	0	1	hsa-miR-148a-5p	-0.05	-0.05
KLHL8	ENST00000273963.5	kelch-like family member 8	266	2	0	0	2	1	hsa-miR-148a-5p	-0.05	-0.09
KRIT1	ENST00000394507.1	KRIT1, ankyrin repeat containing	574	2	0	1	1	1	hsa-miR-148a-5p	-0.05	-0.09
FHL2	ENST00000409177.1	four and a half LIM domains 2	3097	2	0	1	1	4	hsa-miR-148a-5p	-0.05	-0.14
LYRM7	ENST00000507584.1	LYR motif containing 7	217	1	0	1	0	0	hsa-miR-148a-5p	-0.05	-0.11
C4orf40	ENST00000344526.5	chromosome 4 open reading frame 40	5	1	1	0	0	2	hsa-miR-148a-5p	-0.05	-0.27
UBE2Q1	ENST00000292211.4	ubiquitin-conjugating enzyme E2Q family member 1	3046	1	0	0	1	0	hsa-miR-148a-5p	-0.05	-0.07
RSF1	ENST00000308488.6	remodeling and spacing factor 1	216	1	0	1	0	5	hsa-miR-148a-5p	-0.05	-0.05
ZNF738	ENST00000380870.4	zinc finger protein 738	28	1	0	1	0	0	hsa-miR-148a-5p	-0.05	-0.12
TSN	ENST00000536142.1	translin	886	1	1	0	0	0	hsa-miR-148a-5p	-0.05	-0.3
CYYR1	ENST00000299340.4	cysteine/tyrosine-rich 1	5	1	0	1	0	0	hsa-miR-148a-5p	-0.05	-0.05
PRAMEF1	ENST00000332296.7	PRAME family member 1	5	1	0	1	0	0	hsa-miR-148a-5p	-0.05	-0.05
LEMD2	ENST00000293760.5	LEM domain containing 2	208	1	0	1	0	0	hsa-miR-148a-5p	-0.05	-0.05
TLR5	ENST00000540964.1	toll-like receptor 5	5	1	0	1	0	0	hsa-miR-148a-5p	-0.05	-0.05
SIM1	ENST00000369208.3	single-minded homolog 1 (Drosophila)	104	2	0	1	1	0	hsa-miR-148a-5p	-0.05	-0.05
FAM198A	ENST00000430121.2	family with sequence similarity 198, member A	25	1	0	1	0	0	hsa-miR-148a-5p	-0.05	-0.08
ATP9A	ENST00000311637.5	ATPase, class II, type 9A	1511	2	1	1	0	2	hsa-miR-148a-5p	-0.05	-0.05
KLHL2	ENST00000538127.1	kelch-like family member 2	511	1	0	1	0	0	hsa-miR-148a-5p	-0.05	-0.05
FAM46C	ENST00000369448.3	family with sequence similarity 46, member C	74	1	0	1	0	1	hsa-miR-148a-5p	-0.05	-0.16
SMIM14	ENST00000295958.5	small integral membrane protein 14	601	2	1	0	1	0	hsa-miR-148a-5p	-0.05	-0.25
POP1	ENST00000401707.2	processing of precursor 1, ribonuclease P/MRP subunit (S. cerevisiae)	499	1	0	1	0	0	hsa-miR-148a-5p	-0.05	-0.05
SERBP1	ENST00000370994.4	SERPINE1 mRNA binding protein 1	926	1	0	0	1	2	hsa-miR-148a-5p	-0.05	-0.05
CBR4	ENST00000306193.3	carbonyl reductase 4	90	1	0	0	1	0	hsa-miR-148a-5p	-0.05	-0.07
B4GALT6	ENST00000306851.5	UDP-Gal:betaGlcNAc beta 1,4- galactosyltransferase, polypeptide 6	146	1	0	0	1	1	hsa-miR-148a-5p	-0.05	-0.08
ZFR	ENST00000265069.8	zinc finger RNA binding protein	102	1	0	1	0	0	hsa-miR-148a-5p	-0.05	-0.1
SUMF2	ENST00000434526.2	sulfatase modifying factor 2	182	1	0	1	0	0	hsa-miR-148a-5p	-0.04	-0.04
DHRSX	ENST00000334651.5	dehydrogenase/reductase (SDR family) X-linked	5	1	0	1	0	0	hsa-miR-148a-5p	-0.04	-0.04
SEPHS1	ENST00000545675.1	selenophosphate synthetase 1	281	1	0	0	1	1	hsa-miR-148a-5p	-0.04	-0.05
ZNF432	ENST00000594154.1	zinc finger protein 432	151	1	0	0	1	0	hsa-miR-148a-5p	-0.04	-0.05
STK38L	ENST00000389032.3	serine/threonine kinase 38 like	705	1	0	1	0	0	hsa-miR-148a-5p	-0.04	-0.05
ATXN1	ENST00000244769.4	ataxin 1	106	3	0	3	0	2	hsa-miR-148a-5p	-0.04	-0.06
PPTC7	ENST00000354300.3	PTC7 protein phosphatase homolog (S. cerevisiae)	817	2	0	1	1	2	hsa-miR-148a-5p	-0.04	-0.15
PTBP2	ENST00000609116.1	polypyrimidine tract binding protein 2	70	2	0	1	1	2	hsa-miR-148a-5p	-0.04	-0.06
CACNA2D1	ENST00000356860.3	calcium channel, voltage-dependent, alpha 2/delta subunit 1	418	1	1	0	0	1	hsa-miR-148a-5p	-0.04	-0.05
LIFR	ENST00000263409.4	leukemia inhibitory factor receptor alpha	44	1	0	1	0	1	hsa-miR-148a-5p	-0.04	-0.1
LACE1	ENST00000368977.4	lactation elevated 1	42	1	1	0	0	0	hsa-miR-148a-5p	-0.04	-0.13
PURB	ENST00000395699.2	purine-rich element binding protein B	497	1	0	1	0	0	hsa-miR-148a-5p	-0.04	-0.04
TIFAB	ENST00000537858.1	TRAF-interacting protein with forkhead-associated domain, family member B	5	1	0	1	0	1	hsa-miR-148a-5p	-0.04	-0.04
NOVA1	ENST00000465357.2	neuro-oncological ventral antigen 1	5	1	0	1	0	1	hsa-miR-148a-5p	-0.04	-0.04
RAB7L1	ENST00000367139.3	RAB7, member RAS oncogene family-like 1	61	1	0	1	0	0	hsa-miR-148a-5p	-0.04	-0.04
SLC6A5	ENST00000525748.1	solute carrier family 6 (neurotransmitter transporter), member 5	5	1	0	1	0	2	hsa-miR-148a-5p	-0.04	-0.04
LAS1L	ENST00000312391.8	LAS1-like (S. cerevisiae)	26	1	0	1	0	0	hsa-miR-148a-5p	-0.04	-0.04
COX19	ENST00000344111.3	cytochrome c oxidase assembly homolog 19 (S. cerevisiae)	734	1	0	1	0	1	hsa-miR-148a-5p	-0.04	-0.1
CDK19	ENST00000368911.3	cyclin-dependent kinase 19	51	1	0	0	1	0	hsa-miR-148a-5p	-0.04	-0.08
TGM2	ENST00000361475.2	transglutaminase 2	731	1	0	1	0	0	hsa-miR-148a-5p	-0.04	-0.04
PLXDC1	ENST00000315392.4	plexin domain containing 1	9	1	0	0	1	1	hsa-miR-148a-5p	-0.04	-0.08
MED8	ENST00000372457.4	mediator complex subunit 8	745	1	1	0	0	0	hsa-miR-148a-5p	-0.04	-0.17
LZIC	ENST00000377223.1	leucine zipper and CTNNBIP1 domain containing	508	1	0	0	1	1	hsa-miR-148a-5p	-0.04	-0.08
ZNF587	ENST00000339656.5	zinc finger protein 587	52	1	0	1	0	0	hsa-miR-148a-5p	-0.04	-0.05
IRAK4	ENST00000431837.1	interleukin-1 receptor-associated kinase 4	223	1	0	0	1	1	hsa-miR-148a-5p	-0.04	-0.04
FAM208A	ENST00000493960.2	family with sequence similarity 208, member A	60	2	0	2	0	1	hsa-miR-148a-5p	-0.04	-0.06
TERF2	ENST00000254942.3	telomeric repeat binding factor 2	709	2	0	1	1	1	hsa-miR-148a-5p	-0.04	-0.06
RTN4RL2	ENST00000335099.3	reticulon 4 receptor-like 2	13	1	0	1	0	0	hsa-miR-148a-5p	-0.04	-0.04
B3GALT5	ENST00000380620.4	UDP-Gal:betaGlcNAc beta 1,3-galactosyltransferase, polypeptide 5	5	1	0	1	0	2	hsa-miR-148a-5p	-0.04	-0.04
UBE3B	ENST00000434735.2	ubiquitin protein ligase E3B	916	1	0	1	0	0	hsa-miR-148a-5p	-0.04	-0.05
EHHADH	ENST00000231887.3	enoyl-CoA, hydratase/3-hydroxyacyl CoA dehydrogenase	150	1	0	0	1	2	hsa-miR-148a-5p	-0.04	-0.04
VCAM1	ENST00000347652.2	vascular cell adhesion molecule 1	33	1	0	1	0	4	hsa-miR-148a-5p	-0.04	-0.09
AFF2	ENST00000370460.2	AF4/FMR2 family, member 2	8	2	1	1	0	0	hsa-miR-148a-5p	-0.04	-0.05
KLHL24	ENST00000454652.2	kelch-like family member 24	143	3	1	2	0	2	hsa-miR-148a-5p	-0.04	-0.09
BRWD1	ENST00000342449.3	bromodomain and WD repeat domain containing 1	96	5	1	4	0	4	hsa-miR-148a-5p	-0.04	-0.11
PAK2	ENST00000327134.3	p21 protein (Cdc42/Rac)-activated kinase 2	145	4	1	3	0	1	hsa-miR-148a-5p	-0.04	-0.09
DNAJC28	ENST00000381947.3	DnaJ (Hsp40) homolog, subfamily C, member 28	24	1	0	0	1	0	hsa-miR-148a-5p	-0.04	-0.06
COL19A1	ENST00000322773.4	collagen, type XIX, alpha 1	5	2	1	1	0	0	hsa-miR-148a-5p	-0.04	-0.11
AIM1	ENST00000369066.3	absent in melanoma 1	35	1	1	0	0	0	hsa-miR-148a-5p	-0.04	-0.04
GPX6	ENST00000361902.1	glutathione peroxidase 6 (olfactory)	5	1	0	1	0	0	hsa-miR-148a-5p	-0.04	-0.04
ROR1	ENST00000371079.1	receptor tyrosine kinase-like orphan receptor 1	80	1	0	0	1	0	hsa-miR-148a-5p	-0.04	-0.04
SOAT1	ENST00000367619.3	sterol O-acyltransferase 1	654	1	0	1	0	0	hsa-miR-148a-5p	-0.04	-0.04
DIEXF	ENST00000491415.2	digestive organ expansion factor homolog (zebrafish)	493	3	0	2	1	0	hsa-miR-148a-5p	-0.04	-0.06
TMEM38B	ENST00000374692.3	transmembrane protein 38B	755	1	0	1	0	0	hsa-miR-148a-5p	-0.04	-0.07
POU6F1	ENST00000389243.4	POU class 6 homeobox 1	135	1	0	1	0	0	hsa-miR-148a-5p	-0.04	-0.04
KAL1	ENST00000262648.3	Kallmann syndrome 1 sequence	11	2	0	1	1	2	hsa-miR-148a-5p	-0.04	-0.04
PLXNA2	ENST00000367033.3	plexin A2	8	2	0	2	0	4	hsa-miR-148a-5p	-0.04	-0.04
MC2R	ENST00000327606.3	melanocortin 2 receptor (adrenocorticotropic hormone)	5	1	0	1	0	1	hsa-miR-148a-5p	-0.04	-0.04
NT5DC1	ENST00000319550.4	5'-nucleotidase domain containing 1	127	2	0	2	0	0	hsa-miR-148a-5p	-0.04	-0.08
GK5	ENST00000392993.2	glycerol kinase 5 (putative)	73	1	1	0	0	2	hsa-miR-148a-5p	-0.04	-0.06
PKN2	ENST00000370521.3	protein kinase N2	747	1	0	0	1	0	hsa-miR-148a-5p	-0.04	-0.04
ZSWIM7	ENST00000486655.1	zinc finger, SWIM-type containing 7	656	1	1	0	0	0	hsa-miR-148a-5p	-0.04	-0.39
ADIPOR2	ENST00000357103.4	adiponectin receptor 2	138	1	0	1	0	0	hsa-miR-148a-5p	-0.04	-0.05
SPAG16	ENST00000432529.2	sperm associated antigen 16	107	2	1	0	1	0	hsa-miR-148a-5p	-0.04	-0.5
YIPF6	ENST00000462683.1	Yip1 domain family, member 6	888	1	0	0	1	1	hsa-miR-148a-5p	-0.04	-0.06
P2RY13	ENST00000325602.5	purinergic receptor P2Y, G-protein coupled, 13	5	1	0	1	0	1	hsa-miR-148a-5p	-0.04	-0.04
CCDC144NL	ENST00000327925.5	coiled-coil domain containing 144 family, N-terminal like	5	1	0	1	0	0	hsa-miR-148a-5p	-0.04	-0.04
RUNX1T1	ENST00000523629.1	runt-related transcription factor 1; translocated to, 1 (cyclin D-related)	9	1	0	1	0	1	hsa-miR-148a-5p	-0.04	-0.04
WNT2B	ENST00000369686.5	wingless-type MMTV integration site family, member 2B	5	2	0	2	0	2	hsa-miR-148a-5p	-0.04	-0.04
WBP1L	ENST00000369889.4	WW domain binding protein 1-like	5	1	0	1	0	0	hsa-miR-148a-5p	-0.04	-0.04
ZNF217	ENST00000371471.2	zinc finger protein 217	668	1	0	0	1	0	hsa-miR-148a-5p	-0.04	-0.04
WDR78	ENST00000371026.3	WD repeat domain 78	10	1	0	1	0	0	hsa-miR-148a-5p	-0.04	-0.08
C3orf14	ENST00000494481.1	chromosome 3 open reading frame 14	67	1	0	1	0	1	hsa-miR-148a-5p	-0.04	-0.09
PYGO1	ENST00000302000.6	pygopus homolog 1 (Drosophila)	104	3	0	2	1	1	hsa-miR-148a-5p	-0.04	-0.09
SUV420H1	ENST00000304363.4	suppressor of variegation 4-20 homolog 1 (Drosophila)	62	2	1	1	0	0	hsa-miR-148a-5p	-0.04	-0.15
TSPAN6	ENST00000373020.4	tetraspanin 6	885	2	1	0	1	0	hsa-miR-148a-5p	-0.04	-0.35
ZNF85	ENST00000328178.8	zinc finger protein 85	35	2	0	1	1	0	hsa-miR-148a-5p	-0.04	-0.07
GK	ENST00000378946.3	glycerol kinase	38	2	1	1	0	1	hsa-miR-148a-5p	-0.04	-0.06
PTAR1	ENST00000377200.5	protein prenyltransferase alpha subunit repeat containing 1	161	2	0	1	1	0	hsa-miR-148a-5p	-0.04	-0.05
NRCAM	ENST00000379028.3	neuronal cell adhesion molecule	152	1	0	1	0	1	hsa-miR-148a-5p	-0.04	-0.05
PALM2	ENST00000448454.2	paralemmin 2	35	2	0	2	0	0	hsa-miR-148a-5p	-0.04	-0.04
PDE10A	ENST00000366882.1	phosphodiesterase 10A	371	2	0	2	0	0	hsa-miR-148a-5p	-0.04	-0.05
TMEM135	ENST00000340353.7	transmembrane protein 135	963	1	0	1	0	2	hsa-miR-148a-5p	-0.04	-0.06
PRSS12	ENST00000296498.3	protease, serine, 12 (neurotrypsin, motopsin)	57	1	0	0	1	0	hsa-miR-148a-5p	-0.04	-0.09
PCDH19	ENST00000420881.2	protocadherin 19	7	1	1	0	0	0	hsa-miR-148a-5p	-0.04	-0.04
NYNRIN	ENST00000382554.3	NYN domain and retroviral integrase containing	1928	2	0	2	0	0	hsa-miR-148a-5p	-0.04	-0.04
APBA1	ENST00000265381.4	amyloid beta (A4) precursor protein-binding, family A, member 1	12	1	0	1	0	1	hsa-miR-148a-5p	-0.04	-0.04
FZD4	ENST00000531380.1	frizzled family receptor 4	5	2	0	2	0	1	hsa-miR-148a-5p	-0.04	-0.04
CHST15	ENST00000346248.5	carbohydrate (N-acetylgalactosamine 4-sulfate 6-O) sulfotransferase 15	59	2	0	1	1	1	hsa-miR-148a-5p	-0.04	-0.04
C2orf71	ENST00000331664.5	chromosome 2 open reading frame 71	5	2	0	2	0	0	hsa-miR-148a-5p	-0.04	-0.04
TSPYL5	ENST00000322128.3	TSPY-like 5	20	2	0	2	0	1	hsa-miR-148a-5p	-0.04	-0.04
TET2	ENST00000545826.1	tet methylcytosine dioxygenase 2	558	2	0	2	0	2	hsa-miR-148a-5p	-0.04	-0.04
SULF1	ENST00000458141.2	sulfatase 1	11	2	0	2	0	0	hsa-miR-148a-5p	-0.04	-0.04
NMNAT2	ENST00000294868.4	nicotinamide nucleotide adenylyltransferase 2	18	2	0	2	0	1	hsa-miR-148a-5p	-0.04	-0.04
OPCML	ENST00000331898.7	opioid binding protein/cell adhesion molecule-like	5	2	0	2	0	0	hsa-miR-148a-5p	-0.04	-0.04
DISC1	ENST00000439617.2	disrupted in schizophrenia 1	132	2	1	0	1	0	hsa-miR-148a-5p	-0.04	-0.04
IQCA1	ENST00000409907.3	IQ motif containing with AAA domain 1	21	1	0	0	1	0	hsa-miR-148a-5p	-0.04	-0.04
CCDC144A	ENST00000443444.2	coiled-coil domain containing 144A	5	2	0	2	0	1	hsa-miR-148a-5p	-0.04	-0.04
SCN8A	ENST00000354534.6	sodium channel, voltage gated, type VIII, alpha subunit	44	2	1	0	1	0	hsa-miR-148a-5p	-0.04	-0.04
TNS1	ENST00000171887.4	tensin 1	591	2	0	2	0	2	hsa-miR-148a-5p	-0.04	-0.04
P2RY8	ENST00000381297.4	purinergic receptor P2Y, G-protein coupled, 8	5	1	0	1	0	1	hsa-miR-148a-5p	-0.04	-0.04
BEND3	ENST00000369042.1	BEN domain containing 3	13	2	0	2	0	0	hsa-miR-148a-5p	-0.04	-0.04
GPR61	ENST00000527748.1	G protein-coupled receptor 61	5	1	0	1	0	0	hsa-miR-148a-5p	-0.04	-0.04
PCBD2	ENST00000512783.1	pterin-4 alpha-carbinolamine dehydratase/dimerization cofactor of hepatocyte nuclear factor 1 alpha (TCF1) 2	95	2	0	2	0	0	hsa-miR-148a-5p	-0.04	-0.04
BRCC3	ENST00000369462.1	BRCA1/BRCA2-containing complex, subunit 3	14	1	0	1	0	0	hsa-miR-148a-5p	-0.04	-0.04
HIF3A	ENST00000377670.4	hypoxia inducible factor 3, alpha subunit	5	1	0	0	1	0	hsa-miR-148a-5p	-0.04	-0.04
TAB2	ENST00000367456.1	TGF-beta activated kinase 1/MAP3K7 binding protein 2	1129	2	0	2	0	0	hsa-miR-148a-5p	-0.04	-0.04
ANKRD52	ENST00000267116.7	ankyrin repeat domain 52	2913	2	0	2	0	1	hsa-miR-148a-5p	-0.04	-0.04
MANEAL	ENST00000397631.3	mannosidase, endo-alpha-like	381	1	0	0	1	1	hsa-miR-148a-5p	-0.04	-0.04
EFCAB11	ENST00000316738.7	EF-hand calcium binding domain 11	25	1	0	1	0	0	hsa-miR-148a-5p	-0.04	-0.21
IGF2R	ENST00000356956.1	insulin-like growth factor 2 receptor	46	2	1	1	0	0	hsa-miR-148a-5p	-0.04	-0.05
C11orf74	ENST00000534635.1	chromosome 11 open reading frame 74	57	2	0	2	0	0	hsa-miR-148a-5p	-0.04	-0.15
KIAA1737	ENST00000361786.2	KIAA1737	57	1	0	1	0	0	hsa-miR-148a-5p	-0.04	-0.05
GMEB2	ENST00000370069.1	glucocorticoid modulatory element binding protein 2	240	2	0	2	0	0	hsa-miR-148a-5p	-0.04	-0.04
NR1D2	ENST00000312521.4	nuclear receptor subfamily 1, group D, member 2	154	1	0	1	0	0	hsa-miR-148a-5p	-0.04	-0.09
KIAA1191	ENST00000298569.4	KIAA1191	23	1	0	1	0	0	hsa-miR-148a-5p	-0.04	-0.05
HELZ	ENST00000358691.5	helicase with zinc finger	571	1	0	1	0	1	hsa-miR-148a-5p	-0.04	-0.05
ZBTB25	ENST00000608382.1	zinc finger and BTB domain containing 25	149	1	0	1	0	1	hsa-miR-148a-5p	-0.04	-0.05
NUDT16	ENST00000359850.3	nudix (nucleoside diphosphate linked moiety X)-type motif 16	622	1	1	0	0	0	hsa-miR-148a-5p	-0.04	-0.12
CTGF	ENST00000367976.3	connective tissue growth factor	10083	1	0	1	0	2	hsa-miR-148a-5p	-0.04	-0.2
SMPD3	ENST00000219334.5	sphingomyelin phosphodiesterase 3, neutral membrane (neutral sphingomyelinase II)	9	1	0	1	0	0	hsa-miR-148a-5p	-0.04	-0.04
TEAD1	ENST00000361905.4	TEA domain family member 1 (SV40 transcriptional enhancer factor)	740	2	0	2	0	0	hsa-miR-148a-5p	-0.04	-0.04
PDE3A	ENST00000359062.3	phosphodiesterase 3A, cGMP-inhibited	1182	1	1	0	0	2	hsa-miR-148a-5p	-0.04	-0.07
EAF1	ENST00000396842.2	ELL associated factor 1	63	1	0	0	1	1	hsa-miR-148a-5p	-0.04	-0.04
WDR82	ENST00000296490.3	WD repeat domain 82	319	1	0	1	0	0	hsa-miR-148a-5p	-0.04	-0.04
NFX1	ENST00000379540.3	nuclear transcription factor, X-box binding 1	215	1	0	0	1	0	hsa-miR-148a-5p	-0.04	-0.06
TMEM39A	ENST00000319172.5	transmembrane protein 39A	1088	1	0	1	0	0	hsa-miR-148a-5p	-0.04	-0.11
CECR2	ENST00000400573.5	cat eye syndrome chromosome region, candidate 2	46	1	0	1	0	0	hsa-miR-148a-5p	-0.04	-0.08
MIS12	ENST00000381165.3	MIS12 kinetochore complex component	1061	1	0	1	0	0	hsa-miR-148a-5p	-0.04	-0.04
MFAP3	ENST00000436816.1	microfibrillar-associated protein 3	1139	2	0	2	0	1	hsa-miR-148a-5p	-0.04	-0.04
DPY19L2	ENST00000324472.4	dpy-19-like 2 (C. elegans)	17	1	0	1	0	0	hsa-miR-148a-5p	-0.04	-0.14
TMEM106A	ENST00000331615.3	transmembrane protein 106A	22	1	0	1	0	0	hsa-miR-148a-5p	-0.04	-0.04
GINS1	ENST00000429262.2	GINS complex subunit 1 (Psf1 homolog)	56	1	0	1	0	2	hsa-miR-148a-5p	-0.04	-0.05
AMER2	ENST00000357816.2	APC membrane recruitment protein 2	7	1	1	0	0	2	hsa-miR-148a-5p	-0.04	-0.04
AC025278.1	ENST00000377296.3	Uncharacterized protein	5	1	0	1	0	0	hsa-miR-148a-5p	-0.04	-0.04
KPNA3	ENST00000261667.3	karyopherin alpha 3 (importin alpha 4)	104	1	0	1	0	1	hsa-miR-148a-5p	-0.04	-0.05
FERMT1	ENST00000217289.4	fermitin family member 1	245	2	0	2	0	0	hsa-miR-148a-5p	-0.04	-0.04
ZNF207	ENST00000394670.4	zinc finger protein 207	839	3	0	2	1	3	hsa-miR-148a-5p	-0.04	-0.07
BTRC	ENST00000370187.3	beta-transducin repeat containing E3 ubiquitin protein ligase	96	1	0	0	1	1	hsa-miR-148a-5p	-0.04	-0.05
ZBTB33	ENST00000326624.2	zinc finger and BTB domain containing 33	65	1	0	0	1	1	hsa-miR-148a-5p	-0.04	-0.04
ADARB2	ENST00000381312.1	adenosine deaminase, RNA-specific, B2 (non-functional)	9	2	1	0	1	0	hsa-miR-148a-5p	-0.04	-0.08
TRIM38	ENST00000357085.3	tripartite motif containing 38	62	1	0	0	1	1	hsa-miR-148a-5p	-0.04	-0.06
GPR135	ENST00000395116.1	G protein-coupled receptor 135	40	1	0	1	0	2	hsa-miR-148a-5p	-0.04	-0.04
NKAIN1	ENST00000373736.2	Na+/K+ transporting ATPase interacting 1	10	1	0	1	0	1	hsa-miR-148a-5p	-0.04	-0.07
TRNP1	ENST00000522111.2	TMF1-regulated nuclear protein 1	4046	1	0	1	0	0	hsa-miR-148a-5p	-0.04	-0.04
METTL8	ENST00000375258.4	methyltransferase like 8	124	2	1	0	1	1	hsa-miR-148a-5p	-0.04	-0.08
ZBTB44	ENST00000525842.1	zinc finger and BTB domain containing 44	236	3	1	2	0	2	hsa-miR-148a-5p	-0.04	-0.18
ATP2A2	ENST00000395494.2	ATPase, Ca++ transporting, cardiac muscle, slow twitch 2	2042	2	0	2	0	0	hsa-miR-148a-5p	-0.04	-0.04
PAXBP1	ENST00000331923.4	PAX3 and PAX7 binding protein 1	340	1	0	1	0	1	hsa-miR-148a-5p	-0.04	-0.06
ZNF35	ENST00000396056.2	zinc finger protein 35	71	1	0	1	0	0	hsa-miR-148a-5p	-0.04	-0.09
RPAP2	ENST00000610020.1	RNA polymerase II associated protein 2	222	4	3	1	0	3	hsa-miR-148a-5p	-0.04	-0.23
NPY4R	ENST00000374312.1	neuropeptide Y receptor Y4	10	1	0	0	1	1	hsa-miR-148a-5p	-0.04	-0.07
FFAR4	ENST00000371481.4	free fatty acid receptor 4	5	1	0	0	1	1	hsa-miR-148a-5p	-0.04	-0.04
PRAMEF13	ENST00000376132.3	PRAME family member 13	5	1	0	1	0	0	hsa-miR-148a-5p	-0.04	-0.04
WHSC1L1	ENST00000317025.8	Wolf-Hirschhorn syndrome candidate 1-like 1	481	2	0	2	0	0	hsa-miR-148a-5p	-0.04	-0.04
GGCX	ENST00000233838.4	gamma-glutamyl carboxylase	254	3	1	1	1	0	hsa-miR-148a-5p	-0.04	-0.1
PPP1R3D	ENST00000370996.3	protein phosphatase 1, regulatory subunit 3D	132	2	1	1	0	0	hsa-miR-148a-5p	-0.04	-0.16
FAM126A	ENST00000409923.1	family with sequence similarity 126, member A	241	1	0	0	1	2	hsa-miR-148a-5p	-0.04	-0.08
ZNF260	ENST00000523638.1	zinc finger protein 260	165	1	0	1	0	0	hsa-miR-148a-5p	-0.04	-0.04
RAB23	ENST00000317483.3	RAB23, member RAS oncogene family	32	1	0	0	1	0	hsa-miR-148a-5p	-0.04	-0.06
SLC22A17	ENST00000354772.3	solute carrier family 22, member 17	271	1	0	0	1	0	hsa-miR-148a-5p	-0.04	-0.23
RBM28	ENST00000223073.2	RNA binding motif protein 28	297	1	0	1	0	1	hsa-miR-148a-5p	-0.04	-0.05
COL9A1	ENST00000357250.6	collagen, type IX, alpha 1	9	1	0	1	0	1	hsa-miR-148a-5p	-0.04	-0.07
VPS13A	ENST00000360280.3	vacuolar protein sorting 13 homolog A (S. cerevisiae)	110	3	0	2	1	1	hsa-miR-148a-5p	-0.04	-0.05
NTRK2	ENST00000395882.1	neurotrophic tyrosine kinase, receptor, type 2	48	1	0	1	0	0	hsa-miR-148a-5p	-0.04	-0.04
CHCHD5	ENST00000409719.1	coiled-coil-helix-coiled-coil-helix domain containing 5	1577	1	0	0	1	0	hsa-miR-148a-5p	-0.04	-0.04
ESRRG	ENST00000361525.3	estrogen-related receptor gamma	5	1	0	0	1	1	hsa-miR-148a-5p	-0.04	-0.04
MCIDAS	ENST00000513312.1	multiciliate differentiation and DNA synthesis associated cell cycle protein	45	1	0	1	0	0	hsa-miR-148a-5p	-0.04	-0.04
MAN1A1	ENST00000368468.3	mannosidase, alpha, class 1A, member 1	248	1	0	1	0	1	hsa-miR-148a-5p	-0.04	-0.04
FBXO21	ENST00000427718.2	F-box protein 21	1035	2*	0	0	1	2	hsa-miR-148a-5p	-0.04	-0.04
CEP41	ENST00000223208.5	centrosomal protein 41kDa	346	1	1	0	0	0	hsa-miR-148a-5p	-0.04	-0.05
PRCP	ENST00000313010.3	prolylcarboxypeptidase (angiotensinase C)	148	1	0	1	0	0	hsa-miR-148a-5p	-0.04	-0.1
KNOP1	ENST00000219837.7	lysine-rich nucleolar protein 1	157	1	0	1	0	1	hsa-miR-148a-5p	-0.04	-0.06
CYP7B1	ENST00000310193.3	cytochrome P450, family 7, subfamily B, polypeptide 1	53	1	1	0	0	2	hsa-miR-148a-5p	-0.04	-0.04
SRSF1	ENST00000258962.4	serine/arginine-rich splicing factor 1	1430	1	0	1	0	2	hsa-miR-148a-5p	-0.04	-0.11
PINK1	ENST00000321556.4	PTEN induced putative kinase 1	2303	1	0	1	0	0	hsa-miR-148a-5p	-0.04	-0.09
ZNF799	ENST00000419318.1	zinc finger protein 799	17	2	1	1	0	0	hsa-miR-148a-5p	-0.04	-0.05
SLC35A5	ENST00000492406.1	solute carrier family 35, member A5	168	1	1	0	0	1	hsa-miR-148a-5p	-0.04	-0.14
BEND2	ENST00000380033.4	BEN domain containing 2	5	1	0	1	0	0	hsa-miR-148a-5p	-0.04	-0.04
HSPA13	ENST00000285667.3	heat shock protein 70kDa family, member 13	2175	1	1	0	0	1	hsa-miR-148a-5p	-0.04	-0.13
DSP	ENST00000379802.3	desmoplakin	4571	1	0	0	1	0	hsa-miR-148a-5p	-0.04	-0.04
MLLT10	ENST00000377072.3	myeloid/lymphoid or mixed-lineage leukemia (trithorax homolog, Drosophila); translocated to, 10	495	1	0	1	0	0	hsa-miR-148a-5p	-0.04	-0.04
DYNLL2	ENST00000579991.2	dynein, light chain, LC8-type 2	1162	3	2	1	0	0	hsa-miR-148a-5p	-0.03	-0.2
PTPRD	ENST00000381196.4	protein tyrosine phosphatase, receptor type, D	101	1	0	1	0	1	hsa-miR-148a-5p	-0.03	-0.07
KLHL38	ENST00000325995.7	kelch-like family member 38	13	1	0	1	0	0	hsa-miR-148a-5p	-0.03	-0.06
UNC5C	ENST00000453304.1	unc-5 homolog C (C. elegans)	60	2	0	2	0	1	hsa-miR-148a-5p	-0.03	-0.04
FIGN	ENST00000333129.3	fidgetin	10	1	1	0	0	3	hsa-miR-148a-5p	-0.03	-0.07
HIST1H2BN	ENST00000606613.1	histone cluster 1, H2bn	29	1	0	1	0	0	hsa-miR-148a-5p	-0.03	-0.07
NRP1	ENST00000374875.1	neuropilin 1	586	2	0	2	0	0	hsa-miR-148a-5p	-0.03	-0.05
CHIC1	ENST00000373504.6	cysteine-rich hydrophobic domain 1	16	1	0	1	0	2	hsa-miR-148a-5p	-0.03	-0.1
SLC4A8	ENST00000453097.2	solute carrier family 4, sodium bicarbonate cotransporter, member 8	17	2	0	2	0	1	hsa-miR-148a-5p	-0.03	-0.04
ILDR1	ENST00000273691.3	immunoglobulin-like domain containing receptor 1	5	2	0	1	1	0	hsa-miR-148a-5p	-0.03	-0.03
UBALD1	ENST00000590965.1	UBA-like domain containing 1	41	1	0	1	0	0	hsa-miR-148a-5p	-0.03	-0.03
UBR1	ENST00000382177.2	ubiquitin protein ligase E3 component n-recognin 1	11	1	0	0	1	0	hsa-miR-148a-5p	-0.03	-0.03
CTDSP2	ENST00000398073.2	CTD (carboxy-terminal domain, RNA polymerase II, polypeptide A) small phosphatase 2	991	1	0	1	0	0	hsa-miR-148a-5p	-0.03	-0.03
CCNT1	ENST00000261900.3	cyclin T1	86	3	0	3	0	1	hsa-miR-148a-5p	-0.03	-0.19
DDX3Y	ENST00000336079.3	DEAD (Asp-Glu-Ala-Asp) box helicase 3, Y-linked	5	2	0	1	1	0	hsa-miR-148a-5p	-0.03	-0.03
GREM1	ENST00000560677.1	gremlin 1, DAN family BMP antagonist	752	1	0	0	1	2	hsa-miR-148a-5p	-0.03	-0.11
RNF182	ENST00000488300.1	ring finger protein 182	1122	1	0	1	0	2	hsa-miR-148a-5p	-0.03	-0.12
RGS5	ENST00000313961.5	regulator of G-protein signaling 5	56	1	0	1	0	1	hsa-miR-148a-5p	-0.03	-0.05
OGT	ENST00000373719.3	O-linked N-acetylglucosamine (GlcNAc) transferase	1036	1	0	1	0	2	hsa-miR-148a-5p	-0.03	-0.07
LGALS8	ENST00000526589.1	lectin, galactoside-binding, soluble, 8	188	1	0	0	1	0	hsa-miR-148a-5p	-0.03	-0.1
PGPEP1	ENST00000597431.2	pyroglutamyl-peptidase I	82	2	0	1	1	1	hsa-miR-148a-5p	-0.03	-0.08
PARD6B	ENST00000371610.2	par-6 family cell polarity regulator beta	277	1	0	1	0	1	hsa-miR-148a-5p	-0.03	-0.04
CEACAM1	ENST00000403444.3	carcinoembryonic antigen-related cell adhesion molecule 1 (biliary glycoprotein)	925	1	0	1	0	2	hsa-miR-148a-5p	-0.03	-0.03
CYP1B1	ENST00000260630.3	cytochrome P450, family 1, subfamily B, polypeptide 1	111	1	1	0	0	0	hsa-miR-148a-5p	-0.03	-0.04
STXBP4	ENST00000376352.2	syntaxin binding protein 4	62	1	0	0	1	1	hsa-miR-148a-5p	-0.03	-0.05
FOXE1	ENST00000375123.3	forkhead box E1 (thyroid transcription factor 2)	497	1	0	1	0	2	hsa-miR-148a-5p	-0.03	-0.03
SV2C	ENST00000502798.2	synaptic vesicle glycoprotein 2C	30	2	0	2	0	1	hsa-miR-148a-5p	-0.03	-0.04
PHF14	ENST00000403050.3	PHD finger protein 14	112	1	0	0	1	0	hsa-miR-148a-5p	-0.03	-0.04
AAK1	ENST00000409085.4	AP2 associated kinase 1	27	3	0	2	1	1	hsa-miR-148a-5p	-0.03	-0.05
ZSCAN12	ENST00000361028.1	zinc finger and SCAN domain containing 12	117	1	0	1	0	2	hsa-miR-148a-5p	-0.03	-0.03
ZNF662	ENST00000541208.1	zinc finger protein 662	11	1	0	1	0	0	hsa-miR-148a-5p	-0.03	-0.03
NMT2	ENST00000378165.4	N-myristoyltransferase 2	318	1	0	0	1	0	hsa-miR-148a-5p	-0.03	-0.04
ZBTB18	ENST00000358704.4	zinc finger and BTB domain containing 18	935	1	0	1	0	0	hsa-miR-148a-5p	-0.03	-0.03
SLC6A20	ENST00000353278.4	solute carrier family 6 (proline IMINO transporter), member 20	5	1	0	0	1	0	hsa-miR-148a-5p	-0.03	-0.03
ZNF621	ENST00000339296.5	zinc finger protein 621	39	1	0	1	0	0	hsa-miR-148a-5p	-0.03	-0.04
TAF1	ENST00000373790.4	TAF1 RNA polymerase II, TATA box binding protein (TBP)-associated factor, 250kDa	61	1	0	0	1	0	hsa-miR-148a-5p	-0.03	-0.1
WARS2	ENST00000369426.5	tryptophanyl tRNA synthetase 2, mitochondrial	205	1	0	0	1	0	hsa-miR-148a-5p	-0.03	-0.04
NRG2	ENST00000394770.1	neuregulin 2	9	1	0	1	0	0	hsa-miR-148a-5p	-0.03	-0.13
PITPNB	ENST00000335272.5	phosphatidylinositol transfer protein, beta	80	1	0	0	1	0	hsa-miR-148a-5p	-0.03	-0.07
AGO1	ENST00000373204.4	argonaute RISC catalytic component 1	402	2	1	0	1	3	hsa-miR-148a-5p	-0.03	-0.04
GABRB3	ENST00000311550.5	gamma-aminobutyric acid (GABA) A receptor, beta 3	267	1	0	1	0	1	hsa-miR-148a-5p	-0.03	-0.05
ATP11B	ENST00000323116.5	ATPase, class VI, type 11B	459	2	0	1	1	1	hsa-miR-148a-5p	-0.03	-0.11
CHD9	ENST00000566029.1	chromodomain helicase DNA binding protein 9	447	2	1	1	0	0	hsa-miR-148a-5p	-0.03	-0.16
ZNF284	ENST00000421176.3	zinc finger protein 284	42	1	0	1	0	1	hsa-miR-148a-5p	-0.03	-0.04
RASGRP3	ENST00000402538.3	RAS guanyl releasing protein 3 (calcium and DAG-regulated)	24	2	1	1	0	0	hsa-miR-148a-5p	-0.03	-0.07
PLEKHB2	ENST00000438882.2	pleckstrin homology domain containing, family B (evectins) member 2	1358	1	0	0	1	2	hsa-miR-148a-5p	-0.03	-0.12
ABLIM3	ENST00000326685.7	actin binding LIM protein family, member 3	9	2	0	2	0	0	hsa-miR-148a-5p	-0.03	-0.06
RFX3	ENST00000382004.3	regulatory factor X, 3 (influences HLA class II expression)	37	1	0	1	0	3	hsa-miR-148a-5p	-0.03	-0.05
TFEC	ENST00000265440.7	transcription factor EC	5	1	0	1	0	1	hsa-miR-148a-5p	-0.03	-0.03
TRIM71	ENST00000383763.5	tripartite motif containing 71, E3 ubiquitin protein ligase	67	2*	0	1	0	0	hsa-miR-148a-5p	-0.03	-0.03
SFMBT1	ENST00000394752.3	Scm-like with four mbt domains 1	116	2	1	1	0	1	hsa-miR-148a-5p	-0.03	-0.08
ZBTB8B	ENST00000609129.1	zinc finger and BTB domain containing 8B	18	1	0	1	0	0	hsa-miR-148a-5p	-0.03	-0.03
RCC2	ENST00000375436.4	regulator of chromosome condensation 2	180	1	1	0	0	0	hsa-miR-148a-5p	-0.03	-0.03
MAPKBP1	ENST00000457542.2	mitogen-activated protein kinase binding protein 1	36	1	0	1	0	1	hsa-miR-148a-5p	-0.03	-0.03
FAM65C	ENST00000327979.2	family with sequence similarity 65, member C	17	1	0	1	0	0	hsa-miR-148a-5p	-0.03	-0.03
ZNF431	ENST00000311048.7	zinc finger protein 431	93	2	0	1	1	4	hsa-miR-148a-5p	-0.03	-0.05
PHACTR4	ENST00000373839.3	phosphatase and actin regulator 4	85	1	0	0	1	2	hsa-miR-148a-5p	-0.03	-0.03
TBC1D24	ENST00000567020.1	TBC1 domain family, member 24	269	1	1	0	0	0	hsa-miR-148a-5p	-0.03	-0.1
PCM1	ENST00000524226.1	pericentriolar material 1	220	3	1	2	0	0	hsa-miR-148a-5p	-0.03	-0.3
LAMP2	ENST00000371335.4	lysosomal-associated membrane protein 2	3095	1	0	1	0	0	hsa-miR-148a-5p	-0.03	-0.03
HIP1	ENST00000336926.6	huntingtin interacting protein 1	37	2	0	2	0	0	hsa-miR-148a-5p	-0.03	-0.04
CGREF1	ENST00000402394.1	cell growth regulator with EF-hand domain 1	56	1	0	1	0	0	hsa-miR-148a-5p	-0.03	-0.21
RFWD3	ENST00000361070.4	ring finger and WD repeat domain 3	106	1	0	1	0	0	hsa-miR-148a-5p	-0.03	-0.04
STX7	ENST00000367941.2	syntaxin 7	1395	6	0	5	1	2	hsa-miR-148a-5p	-0.03	-0.2
ELP5	ENST00000574993.1	elongator acetyltransferase complex subunit 5	123	1	0	0	1	0	hsa-miR-148a-5p	-0.03	-0.03
PPIP5K2	ENST00000321521.9	diphosphoinositol pentakisphosphate kinase 2	203	1	0	0	1	2	hsa-miR-148a-5p	-0.03	-0.05
AC135983.2	ENST00000593303.1	Protein LOC100996413	5	1	0	1	0	0	hsa-miR-148a-5p	-0.03	-0.03
INO80D	ENST00000403263.1	INO80 complex subunit D	5	2	0	1	1	4	hsa-miR-148a-5p	-0.03	-0.03
SH3BP5L	ENST00000366472.5	SH3-binding domain protein 5-like	379	1	1	0	0	1	hsa-miR-148a-5p	-0.03	-0.03
PROX1	ENST00000366958.4	prospero homeobox 1	131	1	0	1	0	1	hsa-miR-148a-5p	-0.03	-0.03
OGFRL1	ENST00000370435.4	opioid growth factor receptor-like 1	607	1	0	1	0	2	hsa-miR-148a-5p	-0.03	-0.1
MAP2K6	ENST00000590474.1	mitogen-activated protein kinase kinase 6	235	3	1	2	0	4	hsa-miR-148a-5p	-0.03	-0.19
CELF1	ENST00000395290.2	CUGBP, Elav-like family member 1	153	1	0	1	0	1	hsa-miR-148a-5p	-0.03	-0.04
STAT2	ENST00000314128.4	signal transducer and activator of transcription 2, 113kDa	33	1	0	0	1	0	hsa-miR-148a-5p	-0.03	-0.04
ITGBL1	ENST00000545560.2	integrin, beta-like 1 (with EGF-like repeat domains)	106	1	0	1	0	0	hsa-miR-148a-5p	-0.03	-0.04
LTN1	ENST00000361371.5	listerin E3 ubiquitin protein ligase 1	56	1	0	1	0	2	hsa-miR-148a-5p	-0.03	-0.05
CCDC50	ENST00000392455.3	coiled-coil domain containing 50	961	2	0	2	0	0	hsa-miR-148a-5p	-0.03	-0.1
ARSG	ENST00000448504.2	arylsulfatase G	73	1	0	1	0	1	hsa-miR-148a-5p	-0.03	-0.05
SEC62	ENST00000337002.4	SEC62 homolog (S. cerevisiae)	746	1	0	1	0	0	hsa-miR-148a-5p	-0.03	-0.08
ZBTB34	ENST00000319119.4	zinc finger and BTB domain containing 34	726	1	1	0	0	0	hsa-miR-148a-5p	-0.03	-0.03
RPS6KC1	ENST00000366960.3	ribosomal protein S6 kinase, 52kDa, polypeptide 1	57	2	0	1	1	0	hsa-miR-148a-5p	-0.03	-0.03
UBXN2B	ENST00000399598.2	UBX domain protein 2B	157	1	0	0	1	0	hsa-miR-148a-5p	-0.03	-0.03
FAM46A	ENST00000369754.3	family with sequence similarity 46, member A	899	1	1	0	0	0	hsa-miR-148a-5p	-0.03	-0.03
KIAA2018	ENST00000316407.4	KIAA2018	23	2	0	1	1	0	hsa-miR-148a-5p	-0.03	-0.03
SLA	ENST00000338087.5	Src-like-adaptor	5	1	0	1	0	1	hsa-miR-148a-5p	-0.03	-0.03
APOL6	ENST00000409652.4	apolipoprotein L, 6	5	2	0	1	1	1	hsa-miR-148a-5p	-0.03	-0.03
NIPAL4	ENST00000311946.7	NIPA-like domain containing 4	17	2	0	1	1	0	hsa-miR-148a-5p	-0.03	-0.03
TENM1	ENST00000371130.3	teneurin transmembrane protein 1	5	1	1	0	0	0	hsa-miR-148a-5p	-0.03	-0.03
SMG1	ENST00000446231.2	SMG1 phosphatidylinositol 3-kinase-related kinase	339	1	1	0	0	2	hsa-miR-148a-5p	-0.03	-0.03
EYA1	ENST00000388742.4	eyes absent homolog 1 (Drosophila)	222	1	1	0	0	0	hsa-miR-148a-5p	-0.03	-0.03
NCOA2	ENST00000452400.2	nuclear receptor coactivator 2	271	1	1	0	0	0	hsa-miR-148a-5p	-0.03	-0.03
ZDBF2	ENST00000374423.3	zinc finger, DBF-type containing 2	102	2	0	1	1	0	hsa-miR-148a-5p	-0.03	-0.03
TSHR	ENST00000541158.2	thyroid stimulating hormone receptor	5	2	0	1	1	1	hsa-miR-148a-5p	-0.03	-0.03
KMO	ENST00000366559.4	kynurenine 3-monooxygenase (kynurenine 3-hydroxylase)	5	1	0	0	1	1	hsa-miR-148a-5p	-0.03	-0.03
TBX20	ENST00000408931.3	T-box 20	0	1	1	0	0	0	hsa-miR-148a-5p	-0.03	-0.03
SFMBT2	ENST00000361972.4	Scm-like with four mbt domains 2	107	2	0	1	1	1	hsa-miR-148a-5p	-0.03	-0.03
EPB42	ENST00000300215.3	erythrocyte membrane protein band 4.2	5	1	1	0	0	0	hsa-miR-148a-5p	-0.03	-0.03
MAML3	ENST00000509479.2	mastermind-like 3 (Drosophila)	159	1	1	0	0	0	hsa-miR-148a-5p	-0.03	-0.03
XKR4	ENST00000327381.6	XK, Kell blood group complex subunit-related family, member 4	5	1	1	0	0	2	hsa-miR-148a-5p	-0.03	-0.03
FAM131B	ENST00000443739.2	family with sequence similarity 131, member B	5	1	1	0	0	0	hsa-miR-148a-5p	-0.03	-0.03
PRRC2C	ENST00000367742.3	proline-rich coiled-coil 2C	5	1	0	1	0	0	hsa-miR-148a-5p	-0.03	-0.03
GTF3C4	ENST00000372146.4	general transcription factor IIIC, polypeptide 4, 90kDa	1598	1	1	0	0	0	hsa-miR-148a-5p	-0.03	-0.03
CYFIP1	ENST00000313077.7	cytoplasmic FMR1 interacting protein 1	40959	1	0	1	0	1	hsa-miR-148a-5p	-0.03	-0.05
CNNM1	ENST00000356713.4	cyclin M1	45	1	1	0	0	3	hsa-miR-148a-5p	-0.03	-0.03
RP11-766F14.2	ENST00000511828.1	Protein LOC285556	5	2*	1	0	0	2	hsa-miR-148a-5p	-0.03	-0.03
VDR	ENST00000395324.2	vitamin D (1,25- dihydroxyvitamin D3) receptor	416	1	1	0	0	0	hsa-miR-148a-5p	-0.03	-0.03
MYO6	ENST00000369981.3	myosin VI	297	2	1	1	0	0	hsa-miR-148a-5p	-0.03	-0.06
ZKSCAN2	ENST00000328086.7	zinc finger with KRAB and SCAN domains 2	81	2	0	1	1	1	hsa-miR-148a-5p	-0.03	-0.03
FAM168B	ENST00000409185.1	family with sequence similarity 168, member B	122	2	0	1	1	1	hsa-miR-148a-5p	-0.03	-0.07
HECW1	ENST00000395891.2	HECT, C2 and WW domain containing E3 ubiquitin protein ligase 1	11	2	0	2	0	0	hsa-miR-148a-5p	-0.03	-0.07
TTC33	ENST00000337702.4	tetratricopeptide repeat domain 33	676	3	0	2	1	0	hsa-miR-148a-5p	-0.03	-0.17
EDEM3	ENST00000318130.8	ER degradation enhancer, mannosidase alpha-like 3	535	1	1	0	0	0	hsa-miR-148a-5p	-0.03	-0.03
RREB1	ENST00000379938.2	ras responsive element binding protein 1	340	2	0	1	1	0	hsa-miR-148a-5p	-0.03	-0.03
SLC8A1	ENST00000406785.2	solute carrier family 8 (sodium/calcium exchanger), member 1	61	8	0	6	2	1	hsa-miR-148a-5p	-0.03	-0.14
CNIH4	ENST00000465271.1	cornichon family AMPA receptor auxiliary protein 4	1348	1	1	0	0	1	hsa-miR-148a-5p	-0.03	-0.08
MAP3K2	ENST00000409947.1	mitogen-activated protein kinase kinase kinase 2	187	2	0	1	1	4	hsa-miR-148a-5p	-0.03	-0.03
FAM122B	ENST00000370790.1	family with sequence similarity 122B	334	2	0	1	1	1	hsa-miR-148a-5p	-0.03	-0.04
GAB2	ENST00000340149.2	GRB2-associated binding protein 2	627	2	0	1	1	0	hsa-miR-148a-5p	-0.03	-0.03
H6PD	ENST00000377403.2	hexose-6-phosphate dehydrogenase (glucose 1-dehydrogenase)	467	1	1	0	0	0	hsa-miR-148a-5p	-0.03	-0.03
FBXW8	ENST00000455858.2	F-box and WD repeat domain containing 8	169	1	0	1	0	0	hsa-miR-148a-5p	-0.03	-0.12
DENND6B	ENST00000413817.3	DENN/MADD domain containing 6B	15	2	1	1	0	1	hsa-miR-148a-5p	-0.03	-0.05
NHLRC2	ENST00000369301.3	NHL repeat containing 2	368	1	1	0	0	1	hsa-miR-148a-5p	-0.03	-0.03
MAP4K4	ENST00000413150.2	mitogen-activated protein kinase kinase kinase kinase 4	1551	3	0	3	0	0	hsa-miR-148a-5p	-0.03	-0.06
FAS	ENST00000352159.4	Fas cell surface death receptor	378	2	0	2	0	0	hsa-miR-148a-5p	-0.03	-0.14
ZNF740	ENST00000416904.3	zinc finger protein 740	2137	1	1	0	0	1	hsa-miR-148a-5p	-0.03	-0.03
PHKA1	ENST00000373542.4	phosphorylase kinase, alpha 1 (muscle)	277	2	0	1	1	0	hsa-miR-148a-5p	-0.03	-0.04
BUB3	ENST00000368865.4	BUB3 mitotic checkpoint protein	5237	1	0	0	1	0	hsa-miR-148a-5p	-0.03	-0.03
SMC3	ENST00000361804.4	structural maintenance of chromosomes 3	15	1	0	1	0	0	hsa-miR-148a-5p	-0.03	-0.05
GXYLT1	ENST00000398675.3	glucoside xylosyltransferase 1	126	1	0	1	0	0	hsa-miR-148a-5p	-0.03	-0.03
DACH1	ENST00000305425.4	dachshund homolog 1 (Drosophila)	18	1	0	1	0	2	hsa-miR-148a-5p	-0.03	-0.03
TBX18	ENST00000369663.5	T-box 18	54	1	1	0	0	0	hsa-miR-148a-5p	-0.03	-0.06
GPM6A	ENST00000280187.7	glycoprotein M6A	335	1	0	0	1	1	hsa-miR-148a-5p	-0.03	-0.1
DSC2	ENST00000251081.6	desmocollin 2	145	1	0	1	0	0	hsa-miR-148a-5p	-0.03	-0.06
ZNF780B	ENST00000434248.1	zinc finger protein 780B	77	2	0	1	1	1	hsa-miR-148a-5p	-0.03	-0.03
TBC1D9	ENST00000442267.2	TBC1 domain family, member 9 (with GRAM domain)	200	1	0	1	0	0	hsa-miR-148a-5p	-0.03	-0.07
RAB5B	ENST00000553116.1	RAB5B, member RAS oncogene family	14	1	0	1	0	0	hsa-miR-148a-5p	-0.03	-0.08
PACS1	ENST00000320580.4	phosphofurin acidic cluster sorting protein 1	87	2	1	1	0	0	hsa-miR-148a-5p	-0.03	-0.05
TRPC3	ENST00000264811.5	transient receptor potential cation channel, subfamily C, member 3	37	1*	0	0	0	1	hsa-miR-148a-5p	-0.03	-0.04
EPHA3	ENST00000494014.1	EPH receptor A3	100	1	0	1	0	1	hsa-miR-148a-5p	-0.03	-0.03
UBE2H	ENST00000355621.3	ubiquitin-conjugating enzyme E2H	855	1	0	0	1	0	hsa-miR-148a-5p	-0.03	-0.03
SCML2	ENST00000398048.3	sex comb on midleg-like 2 (Drosophila)	7	1	0	1	0	0	hsa-miR-148a-5p	-0.03	-0.13
FLRT2	ENST00000330753.4	fibronectin leucine rich transmembrane protein 2	73	3	0	1	2	0	hsa-miR-148a-5p	-0.03	-0.05
RAB3GAP2	ENST00000358951.2	RAB3 GTPase activating protein subunit 2 (non-catalytic)	461	1	0	0	1	1	hsa-miR-148a-5p	-0.03	-0.05
CUEDC1	ENST00000577830.1	CUE domain containing 1	1243	1	0	1	0	0	hsa-miR-148a-5p	-0.03	-0.03
TARS2	ENST00000369064.3	threonyl-tRNA synthetase 2, mitochondrial (putative)	10	1	0	1	0	0	hsa-miR-148a-5p	-0.03	-0.03
CD28	ENST00000324106.8	CD28 molecule	5	1	0	1	0	0	hsa-miR-148a-5p	-0.03	-0.03
PARP11	ENST00000427057.2	poly (ADP-ribose) polymerase family, member 11	75	1	0	0	1	0	hsa-miR-148a-5p	-0.03	-0.03
ANKRD28	ENST00000399451.2	ankyrin repeat domain 28	798	1	0	1	0	1	hsa-miR-148a-5p	-0.03	-0.05
GPR141	ENST00000447769.1	G protein-coupled receptor 141	9	1	0	0	1	0	hsa-miR-148a-5p	-0.03	-0.16
ADAP2	ENST00000330889.3	ArfGAP with dual PH domains 2	16	2	0	1	1	0	hsa-miR-148a-5p	-0.03	-0.04
SEC22A	ENST00000481965.2	SEC22 vesicle trafficking protein homolog A (S. cerevisiae)	294	1	1	0	0	0	hsa-miR-148a-5p	-0.03	-0.23
SMG7	ENST00000367537.3	SMG7 nonsense mediated mRNA decay factor	305	2	0	1	1	1	hsa-miR-148a-5p	-0.03	-0.05
CFL2	ENST00000341223.3	cofilin 2 (muscle)	902	1	1	0	0	0	hsa-miR-148a-5p	-0.03	-0.14
HSPA12A	ENST00000369209.3	heat shock 70kDa protein 12A	37	2	1	1	0	1	hsa-miR-148a-5p	-0.03	-0.05
ATP1B3	ENST00000539728.1	ATPase, Na+/K+ transporting, beta 3 polypeptide	269	1	0	0	1	0	hsa-miR-148a-5p	-0.03	-0.1
DPY19L4	ENST00000414645.2	dpy-19-like 4 (C. elegans)	362	1	0	1	0	0	hsa-miR-148a-5p	-0.03	-0.03
RTF1	ENST00000389629.4	Rtf1, Paf1/RNA polymerase II complex component, homolog (S. cerevisiae)	1869	1	0	1	0	2	hsa-miR-148a-5p	-0.03	-0.03
SRGAP3	ENST00000383836.3	SLIT-ROBO Rho GTPase activating protein 3	38	1	1	0	0	0	hsa-miR-148a-5p	-0.03	-0.03
FSTL4	ENST00000265342.7	follistatin-like 4	60	1	0	0	1	0	hsa-miR-148a-5p	-0.03	-0.04
ENOX2	ENST00000370935.1	ecto-NOX disulfide-thiol exchanger 2	215	2	0	1	1	0	hsa-miR-148a-5p	-0.03	-0.05
PHF15	ENST00000402835.1	PHD finger protein 15	387	2	0	2	0	1	hsa-miR-148a-5p	-0.03	-0.04
ZFHX4	ENST00000521891.2	zinc finger homeobox 4	194	2	0	0	2	2	hsa-miR-148a-5p	-0.03	-0.03
TTLL12	ENST00000216129.6	tubulin tyrosine ligase-like family, member 12	137	2	0	2	0	0	hsa-miR-148a-5p	-0.03	-0.05
TNKS	ENST00000310430.6	tankyrase, TRF1-interacting ankyrin-related ADP-ribose polymerase	943	2	0	1	1	2	hsa-miR-148a-5p	-0.03	-0.03
TSR2	ENST00000375151.4	TSR2, 20S rRNA accumulation, homolog (S. cerevisiae)	233	1	0	1	0	0	hsa-miR-148a-5p	-0.03	-0.03
JHDM1D	ENST00000397560.2	jumonji C domain containing histone demethylase 1 homolog D (S. cerevisiae)	470	1	1	0	0	5	hsa-miR-148a-5p	-0.03	-0.03
FRK	ENST00000606080.1	fyn-related kinase	37	3	0	3	0	0	hsa-miR-148a-5p	-0.03	-0.06
ITPR2	ENST00000381340.3	inositol 1,4,5-trisphosphate receptor, type 2	334	2	0	1	1	1	hsa-miR-148a-5p	-0.03	-0.03
BMP2K	ENST00000335016.5	BMP2 inducible kinase	164	1	0	1	0	1	hsa-miR-148a-5p	-0.03	-0.03
CACNA2D4	ENST00000382722.5	calcium channel, voltage-dependent, alpha 2/delta subunit 4	16	1	0	1	0	1	hsa-miR-148a-5p	-0.03	-0.03
SLC6A14	ENST00000371900.4	solute carrier family 6 (amino acid transporter), member 14	5	1	0	0	1	1	hsa-miR-148a-5p	-0.03	-0.03
XXbac-BPG32J3.20	ENST00000461287.1		1251	1	0	1	0	0	hsa-miR-148a-5p	-0.03	-0.03
FRMD3	ENST00000304195.3	FERM domain containing 3	14	1	1	0	0	0	hsa-miR-148a-5p	-0.03	-0.03
PTCH1	ENST00000430669.2	patched 1	123	1	0	1	0	1	hsa-miR-148a-5p	-0.03	-0.03
PRPS2	ENST00000380668.5	phosphoribosyl pyrophosphate synthetase 2	739	1	1	0	0	0	hsa-miR-148a-5p	-0.03	-0.22
DNAJA4	ENST00000394855.3	DnaJ (Hsp40) homolog, subfamily A, member 4	24	2	0	1	1	0	hsa-miR-148a-5p	-0.03	-0.08
TSPAN2	ENST00000369516.2	tetraspanin 2	43	1	0	1	0	1	hsa-miR-148a-5p	-0.03	-0.09
AHI1	ENST00000417892.2	Abelson helper integration site 1	72	1	0	1	0	0	hsa-miR-148a-5p	-0.03	-0.13
TOMM70A	ENST00000284320.5	translocase of outer mitochondrial membrane 70 homolog A (S. cerevisiae)	639	1	0	1	0	0	hsa-miR-148a-5p	-0.03	-0.09
KCNA1	ENST00000382545.3	potassium voltage-gated channel, shaker-related subfamily, member 1 (episodic ataxia with myokymia)	5	1	0	1	0	1	hsa-miR-148a-5p	-0.03	-0.03
C5orf51	ENST00000381647.2	chromosome 5 open reading frame 51	124	1	0	1	0	0	hsa-miR-148a-5p	-0.03	-0.03
CCDC180	ENST00000395220.1	coiled-coil domain containing 180	10	1	0	1	0	0	hsa-miR-148a-5p	-0.03	-0.03
GRIK2	ENST00000413795.1	glutamate receptor, ionotropic, kainate 2	28	1	0	1	0	1	hsa-miR-148a-5p	-0.03	-0.03
KCNV1	ENST00000524391.1	potassium channel, subfamily V, member 1	5	1	0	1	0	1	hsa-miR-148a-5p	-0.03	-0.03
EYA3	ENST00000373871.3	eyes absent homolog 3 (Drosophila)	50	1	0	1	0	3	hsa-miR-148a-5p	-0.03	-0.03
UTP14C	ENST00000521776.2	UTP14, U3 small nucleolar ribonucleoprotein, homolog C (yeast)	174	1	0	1	0	0	hsa-miR-148a-5p	-0.03	-0.03
LANCL1	ENST00000443314.1	LanC lantibiotic synthetase component C-like 1 (bacterial)	3395	1	0	1	0	2	hsa-miR-148a-5p	-0.03	-0.03
DNM1L	ENST00000452533.2	dynamin 1-like	399	2	0	0	2	0	hsa-miR-148a-5p	-0.03	-0.13
ZNF154	ENST00000512439.2	zinc finger protein 154	5	1	0	0	1	0	hsa-miR-148a-5p	-0.03	-0.03
TRIP12	ENST00000283943.5	thyroid hormone receptor interactor 12	145	2	0	2	0	1	hsa-miR-148a-5p	-0.03	-0.04
ZNF107	ENST00000344930.3	zinc finger protein 107	209	1	0	0	1	1	hsa-miR-148a-5p	-0.03	-0.04
AIF1L	ENST00000372300.1	allograft inflammatory factor 1-like	487	1	0	0	1	0	hsa-miR-148a-5p	-0.03	-0.04
FUT8	ENST00000360689.5	fucosyltransferase 8 (alpha (1,6) fucosyltransferase)	64	1	0	1	0	0	hsa-miR-148a-5p	-0.03	-0.04
POLR3G	ENST00000504930.1	polymerase (RNA) III (DNA directed) polypeptide G (32kD)	67	1	0	0	1	0	hsa-miR-148a-5p	-0.03	-0.13
SLC7A1	ENST00000380752.5	solute carrier family 7 (cationic amino acid transporter, y+ system), member 1	338	1	1	0	0	0	hsa-miR-148a-5p	-0.03	-0.03
SFRP2	ENST00000274063.4	secreted frizzled-related protein 2	21	1	0	0	1	0	hsa-miR-148a-5p	-0.03	-0.06
SDAD1	ENST00000356260.5	SDA1 domain containing 1	91	1	0	0	1	2	hsa-miR-148a-5p	-0.03	-0.05
SULF2	ENST00000359930.4	sulfatase 2	103	1	0	1	0	1	hsa-miR-148a-5p	-0.03	-0.04
MFSD1	ENST00000415822.2	major facilitator superfamily domain containing 1	257	2	0	2	0	1	hsa-miR-148a-5p	-0.03	-0.14
OPN1SW	ENST00000249389.2	opsin 1 (cone pigments), short-wave-sensitive	6	1	0	1	0	0	hsa-miR-148a-5p	-0.03	-0.21
CUL2	ENST00000374746.1	cullin 2	27	1	0	0	1	1	hsa-miR-148a-5p	-0.03	-0.09
C7orf60	ENST00000297145.4	chromosome 7 open reading frame 60	39	1	0	1	0	1	hsa-miR-148a-5p	-0.03	-0.1
HEATR1	ENST00000366582.3	HEAT repeat containing 1	282	1	0	0	1	2	hsa-miR-148a-5p	-0.03	-0.09
ZEB2	ENST00000558170.2	zinc finger E-box binding homeobox 2	33	1	0	1	0	2	hsa-miR-148a-5p	-0.03	-0.04
ZNF827	ENST00000379448.4	zinc finger protein 827	17	1	1	0	0	1	hsa-miR-148a-5p	-0.03	-0.04
IP6K1	ENST00000468463.1	inositol hexakisphosphate kinase 1	406	1	0	1	0	2	hsa-miR-148a-5p	-0.03	-0.07
NFAM1	ENST00000329021.5	NFAT activating protein with ITAM motif 1	7	2*	0	1	0	2	hsa-miR-148a-5p	-0.03	-0.03
BICD1	ENST00000548411.1	bicaudal D homolog 1 (Drosophila)	205	2	0	1	1	0	hsa-miR-148a-5p	-0.03	-0.03
RBPJ	ENST00000504907.1	recombination signal binding protein for immunoglobulin kappa J region	70	1	0	1	0	5	hsa-miR-148a-5p	-0.03	-0.03
GRAP2	ENST00000344138.4	GRB2-related adaptor protein 2	5	1	1	0	0	3	hsa-miR-148a-5p	-0.03	-0.15
[truncated: 1,318 more rows]

## Sheet: S1_DIANA-microT
Transcript Id	Gene Id(name)	name	Mirna Name	miTG score
ENST00000334567	ENSG00000186329 (TMEM212)	TMEM212	hsa-miR-148a-5p	0.998531062
ENST00000521891	ENSG00000091656 (ZFHX4)	ZFHX4	hsa-miR-148a-5p	0.993660046
ENST00000578317	ENSG00000141030 (COPS3)	COPS3	hsa-miR-148a-5p	0.993381991
ENST00000368635	ENSG00000155130 (MARCKS)	MARCKS	hsa-miR-148a-5p	0.992891197
ENST00000379687	ENSG00000173681 (CXorf23)	CXorf23	hsa-miR-148a-5p	0.992260982
ENST00000340595	ENSG00000080493 (SLC4A4)	SLC4A4	hsa-miR-148a-5p	0.991397575
ENST00000194672	ENSG00000082269 (FAM135A)	FAM135A	hsa-miR-148a-5p	0.989700018
ENST00000598930	ENSG00000269282 (AC024257.1)	AC024257.1	hsa-miR-148a-5p	0.989699496
ENST00000430321	ENSG00000144357 (UBR3)	UBR3	hsa-miR-148a-5p	0.988930218
ENST00000537553	ENSG00000110888 (CAPRIN2)	CAPRIN2	hsa-miR-148a-5p	0.988766072
ENST00000288266	ENSG00000157500 (APPL1)	APPL1	hsa-miR-148a-5p	0.988645025
ENST00000271411	ENSG00000143190 (POU2F1)	POU2F1	hsa-miR-148a-5p	0.988215527
ENST00000423035	ENSG00000197121 (PGAP1)	PGAP1	hsa-miR-148a-5p	0.986978947
ENST00000258349	ENSG00000135870 (RC3H1)	RC3H1	hsa-miR-148a-5p	0.98351075
ENST00000425534	ENSG00000163412 (EIF4E3)	EIF4E3	hsa-miR-148a-5p	0.983254831
ENST00000429071	ENSG00000006652 (IFRD1)	IFRD1	hsa-miR-148a-5p	0.983184026
ENST00000559192	ENSG00000140455 (USP3)	USP3	hsa-miR-148a-5p	0.981570152
ENST00000558084	ENSG00000055609 (KMT2C)	KMT2C	hsa-miR-148a-5p	0.98095919
ENST00000592773	ENSG00000198597 (ZNF536)	ZNF536	hsa-miR-148a-5p	0.980128545
ENST00000406875	ENSG00000064393 (HIPK2)	HIPK2	hsa-miR-148a-5p	0.978603554
ENST00000256509	ENSG00000134121 (CHL1)	CHL1	hsa-miR-148a-5p	0.978054221
ENST00000375458	ENSG00000082438 (COBLL1)	COBLL1	hsa-miR-148a-5p	0.978036866
ENST00000503335	ENSG00000145794 (MEGF10)	MEGF10	hsa-miR-148a-5p	0.977924605
ENST00000247930	ENSG00000196453 (ZNF777)	ZNF777	hsa-miR-148a-5p	0.977906132
ENST00000261745	ENSG00000111300 (NAA25)	NAA25	hsa-miR-148a-5p	0.976480806
ENST00000382004	ENSG00000080298 (RFX3)	RFX3	hsa-miR-148a-5p	0.976294687
ENST00000400573	ENSG00000099954 (CECR2)	CECR2	hsa-miR-148a-5p	0.976108494
ENST00000482512	ENSG00000173230 (GOLGB1)	GOLGB1	hsa-miR-148a-5p	0.975559608
ENST00000378119	ENSG00000112308 (C6orf62)	C6orf62	hsa-miR-148a-5p	0.975166697
ENST00000216513	ENSG00000100625 (SIX4)	SIX4	hsa-miR-148a-5p	0.975127522
ENST00000264377	ENSG00000114948 (ADAM23)	ADAM23	hsa-miR-148a-5p	0.974763047
ENST00000338700	ENSG00000109654 (TRIM2)	TRIM2	hsa-miR-148a-5p	0.97366584
ENST00000517608	ENSG00000104343 (UBE2W)	UBE2W	hsa-miR-148a-5p	0.973199095
ENST00000398399	ENSG00000206538 (VGLL3)	VGLL3	hsa-miR-148a-5p	0.973030499
ENST00000349496	ENSG00000168036 (CTNNB1)	CTNNB1	hsa-miR-148a-5p	0.972993879
ENST00000482325	ENSG00000135968 (GCC2)	GCC2	hsa-miR-148a-5p	0.972774946
ENST00000409645	ENSG00000152127 (MGAT5)	MGAT5	hsa-miR-148a-5p	0.970930599
ENST00000314499	ENSG00000178662 (CSRNP3)	CSRNP3	hsa-miR-148a-5p	0.969595686
ENST00000366968	ENSG00000143494 (VASH2)	VASH2	hsa-miR-148a-5p	0.968748465
ENST00000428210	ENSG00000082898 (XPO1)	XPO1	hsa-miR-148a-5p	0.968506786
ENST00000342983	ENSG00000123728 (RAP2C)	RAP2C	hsa-miR-148a-5p	0.968137536
ENST00000543879	ENSG00000021776 (AQR)	AQR	hsa-miR-148a-5p	0.96806358
ENST00000295065	ENSG00000162959 (MEMO1)	MEMO1	hsa-miR-148a-5p	0.968003321
ENST00000335670	ENSG00000069667 (RORA)	RORA	hsa-miR-148a-5p	0.967052025
ENST00000321437	ENSG00000166128 (RAB8B)	RAB8B	hsa-miR-148a-5p	0.9668576
ENST00000419610	ENSG00000004534 (RBM6)	RBM6	hsa-miR-148a-5p	0.966122778
ENST00000367701	ENSG00000185278 (ZBTB37)	ZBTB37	hsa-miR-148a-5p	0.965656414
ENST00000548054	ENSG00000257987 (LINC00935)	LINC00935	hsa-miR-148a-5p	0.965525122
ENST00000587536	ENSG00000267106 (C19orf82)	C19orf82	hsa-miR-148a-5p	0.96452327
ENST00000531224	ENSG00000029363 (BCLAF1)	BCLAF1	hsa-miR-148a-5p	0.964147216
ENST00000235307	ENSG00000116667 (C1orf21)	C1orf21	hsa-miR-148a-5p	0.963933453
ENST00000558181	ENSG00000128915 (NARG2)	NARG2	hsa-miR-148a-5p	0.963369147
ENST00000526737	ENSG00000159063 (ALG8)	ALG8	hsa-miR-148a-5p	0.96328488
ENST00000406900	ENSG00000096717 (SIRT1)	SIRT1	hsa-miR-148a-5p	0.962943063
ENST00000373191	ENSG00000126070 (AGO3)	AGO3	hsa-miR-148a-5p	0.962738841
ENST00000360647	ENSG00000163848 (ZNF148)	ZNF148	hsa-miR-148a-5p	0.962406803
ENST00000361875	ENSG00000196428 (TSC22D2)	TSC22D2	hsa-miR-148a-5p	0.961853902
ENST00000326866	ENSG00000179059 (ZFP42)	ZFP42	hsa-miR-148a-5p	0.960436663
ENST00000282561	ENSG00000152661 (GJA1)	GJA1	hsa-miR-148a-5p	0.960255693
ENST00000284073	ENSG00000153944 (MSI2)	MSI2	hsa-miR-148a-5p	0.95901279
ENST00000547095	ENSG00000061987 (MON2)	MON2	hsa-miR-148a-5p	0.958523777
ENST00000532414	ENSG00000254726 (MEX3A)	MEX3A	hsa-miR-148a-5p	0.957295672
ENST00000265866	ENSG00000096746 (HNRNPH3)	HNRNPH3	hsa-miR-148a-5p	0.956825068
ENST00000373255	ENSG00000099284 (H2AFY2)	H2AFY2	hsa-miR-148a-5p	0.956822811
ENST00000409947	ENSG00000169967 (MAP3K2)	MAP3K2	hsa-miR-148a-5p	0.956445924
ENST00000456936	ENSG00000134970 (TMED7)	TMED7	hsa-miR-148a-5p	0.956118465
ENST00000416283	ENSG00000006576 (PHTF2)	PHTF2	hsa-miR-148a-5p	0.955059809
ENST00000261798	ENSG00000113712 (CSNK1A1)	CSNK1A1	hsa-miR-148a-5p	0.954868075
ENST00000341165	ENSG00000188554 (NBR1)	NBR1	hsa-miR-148a-5p	0.954598854
ENST00000421367	ENSG00000107566 (ERLIN1)	ERLIN1	hsa-miR-148a-5p	0.954358942
ENST00000367510	ENSG00000121481 (RNF2)	RNF2	hsa-miR-148a-5p	0.953854114
ENST00000324817	ENSG00000180182 (MED14)	MED14	hsa-miR-148a-5p	0.952692825
ENST00000373747	ENSG00000134644 (PUM1)	PUM1	hsa-miR-148a-5p	0.951593345
ENST00000534964	ENSG00000047346 (FAM214A)	FAM214A	hsa-miR-148a-5p	0.951494023
ENST00000261890	ENSG00000103769 (RAB11A)	RAB11A	hsa-miR-148a-5p	0.950804867
ENST00000361264	ENSG00000198876 (DCAF12)	DCAF12	hsa-miR-148a-5p	0.950542345
ENST00000392238	ENSG00000138439 (FAM117B)	FAM117B	hsa-miR-148a-5p	0.949946738
ENST00000525842	ENSG00000196323 (ZBTB44)	ZBTB44	hsa-miR-148a-5p	0.949739751
ENST00000033079	ENSG00000031003 (FAM13B)	FAM13B	hsa-miR-148a-5p	0.949272358
ENST00000434009	ENSG00000009413 (REV3L)	REV3L	hsa-miR-148a-5p	0.949215292
ENST00000398204	ENSG00000008277 (ADAM22)	ADAM22	hsa-miR-148a-5p	0.949106885
ENST00000430804	ENSG00000188906 (LRRK2)	LRRK2	hsa-miR-148a-5p	0.946547741
ENST00000258704	ENSG00000136206 (SPDYE1)	SPDYE1	hsa-miR-148a-5p	0.946419099
ENST00000378191	ENSG00000196581 (AJAP1)	AJAP1	hsa-miR-148a-5p	0.945608179
ENST00000505939	ENSG00000131127 (ZNF141)	ZNF141	hsa-miR-148a-5p	0.945526867
ENST00000445503	ENSG00000116062 (MSH6)	MSH6	hsa-miR-148a-5p	0.945241165
ENST00000296575	ENSG00000164161 (HHIP)	HHIP	hsa-miR-148a-5p	0.943467757
ENST00000474889	ENSG00000144724 (PTPRG)	PTPRG	hsa-miR-148a-5p	0.94329997
ENST00000362032	ENSG00000198829 (SUCNR1)	SUCNR1	hsa-miR-148a-5p	0.942770698
ENST00000426548	ENSG00000182963 (GJC1)	GJC1	hsa-miR-148a-5p	0.942629444
ENST00000380148	ENSG00000205456 (TP53TG3D)	TP53TG3D	hsa-miR-148a-5p	0.942477822
ENST00000380934	ENSG00000147862 (NFIB)	NFIB	hsa-miR-148a-5p	0.942107571
ENST00000451599	ENSG00000123104 (ITPR2)	ITPR2	hsa-miR-148a-5p	0.942019796
ENST00000554908	ENSG00000197045 (GMFB)	GMFB	hsa-miR-148a-5p	0.941171223
ENST00000367033	ENSG00000076356 (PLXNA2)	PLXNA2	hsa-miR-148a-5p	0.940825883
ENST00000303697	ENSG00000170959 (DCDC1)	DCDC1	hsa-miR-148a-5p	0.940352805
ENST00000457714	ENSG00000169760 (NLGN1)	NLGN1	hsa-miR-148a-5p	0.939324809
ENST00000511480	ENSG00000078177 (N4BP2)	N4BP2	hsa-miR-148a-5p	0.938447665
ENST00000308488	ENSG00000048649 (RSF1)	RSF1	hsa-miR-148a-5p	0.938357803
ENST00000360768	ENSG00000196715 (VKORC1L1)	VKORC1L1	hsa-miR-148a-5p	0.937918093
ENST00000395461	ENSG00000213658 (LAT)	LAT	hsa-miR-148a-5p	0.93740768
ENST00000367435	ENSG00000134371 (CDC73)	CDC73	hsa-miR-148a-5p	0.937290835
ENST00000327134	ENSG00000180370 (PAK2)	PAK2	hsa-miR-148a-5p	0.936956453
ENST00000334220	ENSG00000119689 (DLST)	DLST	hsa-miR-148a-5p	0.936409339
ENST00000282391	ENSG00000152520 (PAN3)	PAN3	hsa-miR-148a-5p	0.936345035
ENST00000519560	ENSG00000184347 (SLIT3)	SLIT3	hsa-miR-148a-5p	0.936158435
ENST00000367001	ENSG00000170385 (SLC30A1)	SLC30A1	hsa-miR-148a-5p	0.935953944
ENST00000437844	ENSG00000148516 (ZEB1)	ZEB1	hsa-miR-148a-5p	0.935797659
ENST00000514372	ENSG00000124406 (ATP8A1)	ATP8A1	hsa-miR-148a-5p	0.933958567
ENST00000469858	ENSG00000113810 (SMC4)	SMC4	hsa-miR-148a-5p	0.933791989
ENST00000287322	ENSG00000156735 (BAG4)	BAG4	hsa-miR-148a-5p	0.933680916
ENST00000371989	ENSG00000148248 (SURF4)	SURF4	hsa-miR-148a-5p	0.933224776
ENST00000258646	ENSG00000136144 (RCBTB1)	RCBTB1	hsa-miR-148a-5p	0.933070436
ENST00000409825	ENSG00000068724 (TTC7A)	TTC7A	hsa-miR-148a-5p	0.932864216
ENST00000394670	ENSG00000010244 (ZNF207)	ZNF207	hsa-miR-148a-5p	0.931905372
ENST00000396947	ENSG00000134363 (FST)	FST	hsa-miR-148a-5p	0.931160219
ENST00000372397	ENSG00000157514 (TSC22D3)	TSC22D3	hsa-miR-148a-5p	0.930865653
ENST00000377970	ENSG00000136997 (MYC)	MYC	hsa-miR-148a-5p	0.930089046
ENST00000480945	ENSG00000197312 (DDI2)	DDI2	hsa-miR-148a-5p	0.929288756
ENST00000395571	ENSG00000165156 (ZHX1)	ZHX1	hsa-miR-148a-5p	0.929025677
ENST00000359867	ENSG00000213923 (CSNK1E)	CSNK1E	hsa-miR-148a-5p	0.928463677
ENST00000558170	ENSG00000169554 (ZEB2)	ZEB2	hsa-miR-148a-5p	0.927970791
ENST00000264867	ENSG00000109819 (PPARGC1A)	PPARGC1A	hsa-miR-148a-5p	0.927758756
ENST00000310078	ENSG00000173744 (AGFG1)	AGFG1	hsa-miR-148a-5p	0.927653976
ENST00000519204	ENSG00000145934 (TENM2)	TENM2	hsa-miR-148a-5p	0.926557154
ENST00000391366	ENSG00000212670 (AL161915.1)	AL161915.1	hsa-miR-148a-5p	0.926297673
ENST00000336349	ENSG00000179119 (SPTY2D1)	SPTY2D1	hsa-miR-148a-5p	0.926113984
ENST00000358171	ENSG00000149257 (SERPINH1)	SERPINH1	hsa-miR-148a-5p	0.925962805
ENST00000324460	ENSG00000044574 (HSPA5)	HSPA5	hsa-miR-148a-5p	0.925815356
ENST00000262134	ENSG00000087253 (LPCAT2)	LPCAT2	hsa-miR-148a-5p	0.925502723
ENST00000374586	ENSG00000106771 (TMEM245)	TMEM245	hsa-miR-148a-5p	0.925388451
ENST00000523948	ENSG00000137574 (TGS1)	TGS1	hsa-miR-148a-5p	0.925146044
ENST00000313708	ENSG00000164330 (EBF1)	EBF1	hsa-miR-148a-5p	0.924337344
ENST00000359653	ENSG00000019995 (ZRANB1)	ZRANB1	hsa-miR-148a-5p	0.924103144
ENST00000610020	ENSG00000122484 (RPAP2)	RPAP2	hsa-miR-148a-5p	0.922804247
ENST00000368648	ENSG00000108001 (EBF3)	EBF3	hsa-miR-148a-5p	0.922647742
ENST00000505599	ENSG00000188981 (MSANTD1)	MSANTD1	hsa-miR-148a-5p	0.922330787
ENST00000008527	ENSG00000008405 (CRY1)	CRY1	hsa-miR-148a-5p	0.922268363
ENST00000378204	ENSG00000182197 (EXT1)	EXT1	hsa-miR-148a-5p	0.922020826
ENST00000518322	ENSG00000188343 (FAM92A1)	FAM92A1	hsa-miR-148a-5p	0.920240502
ENST00000506526	ENSG00000152582 (SPEF2)	SPEF2	hsa-miR-148a-5p	0.920005625
ENST00000477973	ENSG00000163602 (RYBP)	RYBP	hsa-miR-148a-5p	0.919755615
ENST00000368679	ENSG00000148848 (ADAM12)	ADAM12	hsa-miR-148a-5p	0.919605816
ENST00000366543	ENSG00000143702 (CEP170)	CEP170	hsa-miR-148a-5p	0.919599343
ENST00000395076	ENSG00000100614 (PPM1A)	PPM1A	hsa-miR-148a-5p	0.919040995
ENST00000437296	ENSG00000114346 (ECT2)	ECT2	hsa-miR-148a-5p	0.91781692
ENST00000469430	ENSG00000102786 (INTS6)	INTS6	hsa-miR-148a-5p	0.917607419
ENST00000264436	ENSG00000075340 (ADD2)	ADD2	hsa-miR-148a-5p	0.917458246
ENST00000554222	ENSG00000092020 (PPP2R3C)	PPP2R3C	hsa-miR-148a-5p	0.917028305
ENST00000257836	ENSG00000135378 (PRRG4)	PRRG4	hsa-miR-148a-5p	0.916680307
ENST00000381405	ENSG00000164283 (ESM1)	ESM1	hsa-miR-148a-5p	0.916584052
ENST00000551295	ENSG00000018236 (CNTN1)	CNTN1	hsa-miR-148a-5p	0.916581157
ENST00000240587	ENSG00000121297 (TSHZ3)	TSHZ3	hsa-miR-148a-5p	0.915481706
ENST00000536534	ENSG00000180287 (PLD5)	PLD5	hsa-miR-148a-5p	0.915177375
ENST00000609438	ENSG00000185477 (GPRIN3)	GPRIN3	hsa-miR-148a-5p	0.915078228
ENST00000405485	ENSG00000179988 (PSTK)	PSTK	hsa-miR-148a-5p	0.914544723
ENST00000561981	ENSG00000260230 (FRRS1L)	FRRS1L	hsa-miR-148a-5p	0.914040915
ENST00000414423	ENSG00000162923 (WDR26)	WDR26	hsa-miR-148a-5p	0.913976886
ENST00000575709	ENSG00000129204 (USP6)	USP6	hsa-miR-148a-5p	0.912340839
ENST00000265970	ENSG00000011405 (PIK3C2A)	PIK3C2A	hsa-miR-148a-5p	0.911964491
ENST00000400198	ENSG00000134884 (ARGLU1)	ARGLU1	hsa-miR-148a-5p	0.911938464
ENST00000373245	ENSG00000136877 (FPGS)	FPGS	hsa-miR-148a-5p	0.91192129
ENST00000559008	ENSG00000259495 (RP11-210M15.2)	RP11-210M15.2	hsa-miR-148a-5p	0.910272421
ENST00000318887	ENSG00000179021 (C3orf38)	C3orf38	hsa-miR-148a-5p	0.910247744
ENST00000337537	ENSG00000154001 (PPP2R5E)	PPP2R5E	hsa-miR-148a-5p	0.909721248
ENST00000263734	ENSG00000116016 (EPAS1)	EPAS1	hsa-miR-148a-5p	0.909318232
ENST00000371117	ENSG00000170927 (PKHD1)	PKHD1	hsa-miR-148a-5p	0.908540389
ENST00000361354	ENSG00000061676 (NCKAP1)	NCKAP1	hsa-miR-148a-5p	0.908524398
ENST00000357692	ENSG00000198160 (MIER1)	MIER1	hsa-miR-148a-5p	0.907828833
ENST00000355780	ENSG00000040341 (STAU2)	STAU2	hsa-miR-148a-5p	0.907109867
ENST00000244769	ENSG00000124788 (ATXN1)	ATXN1	hsa-miR-148a-5p	0.906948077
ENST00000369577	ENSG00000188994 (ZNF292)	ZNF292	hsa-miR-148a-5p	0.906894324
ENST00000366607	ENSG00000173726 (TOMM20)	TOMM20	hsa-miR-148a-5p	0.906878719
ENST00000312431	ENSG00000151914 (DST)	DST	hsa-miR-148a-5p	0.906553807
ENST00000373956	ENSG00000150275 (PCDH15)	PCDH15	hsa-miR-148a-5p	0.906401962
ENST00000453654	ENSG00000157680 (DGKI)	DGKI	hsa-miR-148a-5p	0.906206239
ENST00000394718	ENSG00000179841 (AKAP5)	AKAP5	hsa-miR-148a-5p	0.905710282
ENST00000536719	ENSG00000074319 (TSG101)	TSG101	hsa-miR-148a-5p	0.904524783
ENST00000336934	ENSG00000133121 (STARD13)	STARD13	hsa-miR-148a-5p	0.904313589
ENST00000377669	ENSG00000118922 (KLF12)	KLF12	hsa-miR-148a-5p	0.90345128
ENST00000559726	ENSG00000104043 (ATP8B4)	ATP8B4	hsa-miR-148a-5p	0.903186198
ENST00000356592	ENSG00000113327 (GABRG2)	GABRG2	hsa-miR-148a-5p	0.90314682
ENST00000243349	ENSG00000123612 (ACVR1C)	ACVR1C	hsa-miR-148a-5p	0.902713673
ENST00000394264	ENSG00000187866 (FAM122A)	FAM122A	hsa-miR-148a-5p	0.902591736
ENST00000538975	ENSG00000132361 (CLUH)	CLUH	hsa-miR-148a-5p	0.901442915
ENST00000512294	ENSG00000248801 (RP11-664D7.4)	RP11-664D7.4	hsa-miR-148a-5p	0.901197709
ENST00000568578	ENSG00000147274 (RBMX)	RBMX	hsa-miR-148a-5p	0.901115872
ENST00000392869	ENSG00000121964 (GTDC1)	GTDC1	hsa-miR-148a-5p	0.900736241
ENST00000324472	ENSG00000177990 (DPY19L2)	DPY19L2	hsa-miR-148a-5p	0.900707707
ENST00000367419	ENSG00000055211 (GINM1)	GINM1	hsa-miR-148a-5p	0.900622895
ENST00000377275	ENSG00000165997 (ARL5B)	ARL5B	hsa-miR-148a-5p	0.900312707
ENST00000298492	ENSG00000165660 (FAM175B)	FAM175B	hsa-miR-148a-5p	0.900122439
ENST00000495910	ENSG00000196712 (NF1)	NF1	hsa-miR-148a-5p	0.899703591
ENST00000382549	ENSG00000159079 (C21orf59)	C21orf59	hsa-miR-148a-5p	0.899653897
ENST00000444766	ENSG00000108506 (INTS2)	INTS2	hsa-miR-148a-5p	0.899149485
ENST00000342085	ENSG00000140992 (PDPK1)	PDPK1	hsa-miR-148a-5p	0.898937266
ENST00000257290	ENSG00000134853 (PDGFRA)	PDGFRA	hsa-miR-148a-5p	0.89797601
ENST00000373504	ENSG00000204116 (CHIC1)	CHIC1	hsa-miR-148a-5p	0.897766267
ENST00000505330	ENSG00000017260 (ATP2C1)	ATP2C1	hsa-miR-148a-5p	0.89683281
ENST00000233969	ENSG00000115616 (SLC9A2)	SLC9A2	hsa-miR-148a-5p	0.894821637
ENST00000361085	ENSG00000075407 (ZNF37A)	ZNF37A	hsa-miR-148a-5p	0.894798548
ENST00000234296	ENSG00000115942 (ORC2)	ORC2	hsa-miR-148a-5p	0.894737361
ENST00000381196	ENSG00000153707 (PTPRD)	PTPRD	hsa-miR-148a-5p	0.894542824
ENST00000272748	ENSG00000144320 (KIAA1715)	KIAA1715	hsa-miR-148a-5p	0.894374441
ENST00000307145	ENSG00000169926 (KLF13)	KLF13	hsa-miR-148a-5p	0.894091245
ENST00000470466	ENSG00000055208 (TAB2)	TAB2	hsa-miR-148a-5p	0.894001455
ENST00000462315	ENSG00000138496 (PARP9)	PARP9	hsa-miR-148a-5p	0.893997256
ENST00000559228	ENSG00000128923 (FAM63B)	FAM63B	hsa-miR-148a-5p	0.89396995
ENST00000262013	ENSG00000008294 (SPAG9)	SPAG9	hsa-miR-148a-5p	0.893854484
ENST00000273047	ENSG00000144566 (RAB5A)	RAB5A	hsa-miR-148a-5p	0.893561016
ENST00000251038	ENSG00000100722 (ZC3H14)	ZC3H14	hsa-miR-148a-5p	0.893193041
ENST00000370192	ENSG00000188641 (DPYD)	DPYD	hsa-miR-148a-5p	0.892658006
ENST00000420864	ENSG00000128654 (MTX2)	MTX2	hsa-miR-148a-5p	0.892566339
ENST00000409529	ENSG00000163006 (CCDC138)	CCDC138	hsa-miR-148a-5p	0.892506356
ENST00000441499	ENSG00000105576 (TNPO2)	TNPO2	hsa-miR-148a-5p	0.89229201
ENST00000340635	ENSG00000113448 (PDE4D)	PDE4D	hsa-miR-148a-5p	0.89160181
ENST00000298472	ENSG00000165646 (SLC18A2)	SLC18A2	hsa-miR-148a-5p	0.891574789
ENST00000313116	ENSG00000147124 (ZNF41)	ZNF41	hsa-miR-148a-5p	0.891421497
ENST00000480456	ENSG00000154721 (JAM2)	JAM2	hsa-miR-148a-5p	0.890946083
ENST00000540664	ENSG00000196233 (LCOR)	LCOR	hsa-miR-148a-5p	0.890620817
ENST00000534358	ENSG00000118058 (KMT2A)	KMT2A	hsa-miR-148a-5p	0.890606735
ENST00000493442	ENSG00000123575 (FAM199X)	FAM199X	hsa-miR-148a-5p	0.890289892
ENST00000371236	ENSG00000173406 (DAB1)	DAB1	hsa-miR-148a-5p	0.889953474
ENST00000454652	ENSG00000114796 (KLHL24)	KLHL24	hsa-miR-148a-5p	0.889765023
ENST00000315285	ENSG00000021574 (SPAST)	SPAST	hsa-miR-148a-5p	0.889394982
ENST00000553612	ENSG00000165417 (GTF2A1)	GTF2A1	hsa-miR-148a-5p	0.889264281
ENST00000361157	ENSG00000126709 (IFI6)	IFI6	hsa-miR-148a-5p	0.889263782
ENST00000584307	ENSG00000176105 (YES1)	YES1	hsa-miR-148a-5p	0.888331911
ENST00000286614	ENSG00000156103 (MMP16)	MMP16	hsa-miR-148a-5p	0.887920278
ENST00000374343	ENSG00000204178 (TMEM57)	TMEM57	hsa-miR-148a-5p	0.887849346
ENST00000370161	ENSG00000162688 (AGL)	AGL	hsa-miR-148a-5p	0.887666745
ENST00000395710	ENSG00000198301 (SDAD1)	SDAD1	hsa-miR-148a-5p	0.887408589
ENST00000347635	ENSG00000093000 (NUP50)	NUP50	hsa-miR-148a-5p	0.88719847
ENST00000360380	ENSG00000123473 (STIL)	STIL	hsa-miR-148a-5p	0.886746358
ENST00000552854	ENSG00000139354 (GAS2L3)	GAS2L3	hsa-miR-148a-5p	0.886459382
ENST00000396583	ENSG00000144642 (RBMS3)	RBMS3	hsa-miR-148a-5p	0.885932004
ENST00000366847	ENSG00000213066 (FGFR1OP)	FGFR1OP	hsa-miR-148a-5p	0.885323945
ENST00000312233	ENSG00000174332 (GLIS1)	GLIS1	hsa-miR-148a-5p	0.885293964
ENST00000360415	ENSG00000241258 (CRCP)	CRCP	hsa-miR-148a-5p	0.884723543
ENST00000357154	ENSG00000196104 (SPOCK3)	SPOCK3	hsa-miR-148a-5p	0.884675299
ENST00000394961	ENSG00000163104 (SMARCAD1)	SMARCAD1	hsa-miR-148a-5p	0.884430838
ENST00000361028	ENSG00000158691 (ZSCAN12)	ZSCAN12	hsa-miR-148a-5p	0.884041287
ENST00000420696	ENSG00000185630 (PBX1)	PBX1	hsa-miR-148a-5p	0.884026052
ENST00000473989	ENSG00000157741 (UBN2)	UBN2	hsa-miR-148a-5p	0.883965335
ENST00000300291	ENSG00000167005 (NUDT21)	NUDT21	hsa-miR-148a-5p	0.883903477
ENST00000609686	ENSG00000273079 (GRIN2B)	GRIN2B	hsa-miR-148a-5p	0.883362983
ENST00000369151	ENSG00000151893 (CACUL1)	CACUL1	hsa-miR-148a-5p	0.883296006
ENST00000374618	ENSG00000189180 (ZNF33A)	ZNF33A	hsa-miR-148a-5p	0.883031964
ENST00000407627	ENSG00000066044 (ELAVL1)	ELAVL1	hsa-miR-148a-5p	0.882048296
ENST00000514215	ENSG00000198780 (FAM169A)	FAM169A	hsa-miR-148a-5p	0.881904757
ENST00000427431	ENSG00000151718 (WWC2)	WWC2	hsa-miR-148a-5p	0.881772546
ENST00000426179	ENSG00000227921 (AL353791.1)	AL353791.1	hsa-miR-148a-5p	0.881102662
ENST00000609713	ENSG00000157542 (KCNJ6)	KCNJ6	hsa-miR-148a-5p	0.881061412
ENST00000388996	ENSG00000184156 (KCNQ3)	KCNQ3	hsa-miR-148a-5p	0.88094176
ENST00000593303	ENSG00000268759 (AC135983.2)	AC135983.2	hsa-miR-148a-5p	0.880837793
ENST00000585315	ENSG00000150394 (CDH8)	CDH8	hsa-miR-148a-5p	0.880547073
ENST00000377967	ENSG00000147050 (KDM6A)	KDM6A	hsa-miR-148a-5p	0.880480431
ENST00000370112	ENSG00000162695 (SLC30A7)	SLC30A7	hsa-miR-148a-5p	0.880303995
ENST00000228425	ENSG00000110841 (PPFIBP1)	PPFIBP1	hsa-miR-148a-5p	0.879794077
ENST00000372587	ENSG00000127129 (EDN2)	EDN2	hsa-miR-148a-5p	0.879674053
ENST00000367941	ENSG00000079950 (STX7)	STX7	hsa-miR-148a-5p	0.879471711
ENST00000402690	ENSG00000175387 (SMAD2)	SMAD2	hsa-miR-148a-5p	0.879045314
ENST00000370558	ENSG00000097033 (SH3GLB1)	SH3GLB1	hsa-miR-148a-5p	0.878864557
ENST00000533227	ENSG00000187398 (LUZP2)	LUZP2	hsa-miR-148a-5p	0.87842465
ENST00000406785	ENSG00000183023 (SLC8A1)	SLC8A1	hsa-miR-148a-5p	0.878254478
ENST00000507359	ENSG00000183775 (KCTD16)	KCTD16	hsa-miR-148a-5p	0.877741723
ENST00000305253	ENSG00000166402 (TUB)	TUB	hsa-miR-148a-5p	0.87766227
ENST00000475407	ENSG00000136935 (GOLGA1)	GOLGA1	hsa-miR-148a-5p	0.877629717
ENST00000222329	ENSG00000105722 (ERF)	ERF	hsa-miR-148a-5p	0.877476855
ENST00000398559	ENSG00000144747 (TMF1)	TMF1	hsa-miR-148a-5p	0.877324768
ENST00000330198	ENSG00000185621 (LMLN)	LMLN	hsa-miR-148a-5p	0.876582002
ENST00000265073	ENSG00000113387 (SUB1)	SUB1	hsa-miR-148a-5p	0.876245744
ENST00000395891	ENSG00000002746 (HECW1)	HECW1	hsa-miR-148a-5p	0.875574212
ENST00000304385	ENSG00000170006 (TMEM154)	TMEM154	hsa-miR-148a-5p	0.875272349
ENST00000353442	ENSG00000105983 (LMBR1)	LMBR1	hsa-miR-148a-5p	0.875183112
ENST00000351218	ENSG00000120784 (ZFP30)	ZFP30	hsa-miR-148a-5p	0.874808928
ENST00000473282	ENSG00000136861 (CDK5RAP2)	CDK5RAP2	hsa-miR-148a-5p	0.874758848
ENST00000566029	ENSG00000177200 (CHD9)	CHD9	hsa-miR-148a-5p	0.874642544
ENST00000380672	ENSG00000173068 (BNC2)	BNC2	hsa-miR-148a-5p	0.874584921
ENST00000397992	ENSG00000140836 (ZFHX3)	ZFHX3	hsa-miR-148a-5p	0.874138025
ENST00000538204	ENSG00000076770 (MBNL3)	MBNL3	hsa-miR-148a-5p	0.874004097
ENST00000392021	ENSG00000085978 (ATG16L1)	ATG16L1	hsa-miR-148a-5p	0.873522314
ENST00000239231	ENSG00000120137 (PANK3)	PANK3	hsa-miR-148a-5p	0.873374773
ENST00000181839	ENSG00000065883 (CDK13)	CDK13	hsa-miR-148a-5p	0.873243236
ENST00000370852	ENSG00000146151 (HMGCLL1)	HMGCLL1	hsa-miR-148a-5p	0.873154344
ENST00000257287	ENSG00000174799 (CEP135)	CEP135	hsa-miR-148a-5p	0.872777229
ENST00000324545	ENSG00000124486 (USP9X)	USP9X	hsa-miR-148a-5p	0.872753888
ENST00000430430	ENSG00000205189 (ZBTB10)	ZBTB10	hsa-miR-148a-5p	0.872728144
ENST00000327367	ENSG00000166949 (SMAD3)	SMAD3	hsa-miR-148a-5p	0.872629363
ENST00000512560	ENSG00000177034 (MTX3)	MTX3	hsa-miR-148a-5p	0.872214713
ENST00000283131	ENSG00000153147 (SMARCA5)	SMARCA5	hsa-miR-148a-5p	0.87195069
ENST00000456315	ENSG00000024526 (DEPDC1)	DEPDC1	hsa-miR-148a-5p	0.871931776
ENST00000602452	ENSG00000269964 (MEI4)	MEI4	hsa-miR-148a-5p	0.871828249
ENST00000433351	ENSG00000116005 (PCYOX1)	PCYOX1	hsa-miR-148a-5p	0.870715965
ENST00000396981	ENSG00000132388 (UBE2G1)	UBE2G1	hsa-miR-148a-5p	0.870461579
ENST00000265990	ENSG00000095564 (BTAF1)	BTAF1	hsa-miR-148a-5p	0.870180213
ENST00000515655	ENSG00000118777 (ABCG2)	ABCG2	hsa-miR-148a-5p	0.869905412
ENST00000302190	ENSG00000169439 (SDC2)	SDC2	hsa-miR-148a-5p	0.869225151
ENST00000467460	ENSG00000114757 (PEX5L)	PEX5L	hsa-miR-148a-5p	0.869013111
ENST00000256079	ENSG00000133704 (IPO8)	IPO8	hsa-miR-148a-5p	0.868198388
ENST00000294740	ENSG00000162702 (ZNF281)	ZNF281	hsa-miR-148a-5p	0.868179254
ENST00000350082	ENSG00000112144 (ICK)	ICK	hsa-miR-148a-5p	0.868101709
ENST00000238789	ENSG00000119778 (ATAD2B)	ATAD2B	hsa-miR-148a-5p	0.867619028
ENST00000295049	ENSG00000162944 (RFTN2)	RFTN2	hsa-miR-148a-5p	0.867213389
ENST00000359193	ENSG00000196787 (HIST1H2AG)	HIST1H2AG	hsa-miR-148a-5p	0.867072944
ENST00000369851	ENSG00000065135 (GNAI3)	GNAI3	hsa-miR-148a-5p	0.867052269
ENST00000344989	ENSG00000188529 (SRSF10)	SRSF10	hsa-miR-148a-5p	0.867021641
ENST00000263812	ENSG00000115840 (SLC25A12)	SLC25A12	hsa-miR-148a-5p	0.86631919
ENST00000267859	ENSG00000140299 (BNIP2)	BNIP2	hsa-miR-148a-5p	0.866289485
ENST00000374866	ENSG00000204262 (COL5A2)	COL5A2	hsa-miR-148a-5p	0.866207187
ENST00000446507	ENSG00000171611 (PTCRA)	PTCRA	hsa-miR-148a-5p	0.866034392
ENST00000544246	ENSG00000184226 (PCDH9)	PCDH9	hsa-miR-148a-5p	0.865564774
ENST00000228741	ENSG00000111145 (ELK3)	ELK3	hsa-miR-148a-5p	0.865457656
ENST00000399959	ENSG00000215301 (DDX3X)	DDX3X	hsa-miR-148a-5p	0.865431386
ENST00000470443	ENSG00000090621 (PABPC4)	PABPC4	hsa-miR-148a-5p	0.865409104
ENST00000524164	ENSG00000047249 (ATP6V1H)	ATP6V1H	hsa-miR-148a-5p	0.865210725
ENST00000260731	ENSG00000138160 (KIF11)	KIF11	hsa-miR-148a-5p	0.865035792
ENST00000426654	ENSG00000102908 (NFAT5)	NFAT5	hsa-miR-148a-5p	0.864280935
ENST00000394171	ENSG00000185551 (NR2F2)	NR2F2	hsa-miR-148a-5p	0.863415109
ENST00000503275	ENSG00000069018 (TRPC7)	TRPC7	hsa-miR-148a-5p	0.863093221
ENST00000374875	ENSG00000099250 (NRP1)	NRP1	hsa-miR-148a-5p	0.862573926
ENST00000244040	ENSG00000124209 (RAB22A)	RAB22A	hsa-miR-148a-5p	0.86256289
ENST00000339602	ENSG00000164485 (IL22RA2)	IL22RA2	hsa-miR-148a-5p	0.862489311
ENST00000263102	ENSG00000108091 (CCDC6)	CCDC6	hsa-miR-148a-5p	0.862148749
ENST00000360215	ENSG00000197753 (LHFPL5)	LHFPL5	hsa-miR-148a-5p	0.861955646
ENST00000278590	ENSG00000149289 (ZC3H12C)	ZC3H12C	hsa-miR-148a-5p	0.861763741
ENST00000400104	ENSG00000154655 (L3MBTL4)	L3MBTL4	hsa-miR-148a-5p	0.861535101
ENST00000540014	ENSG00000164463 (CREBRF)	CREBRF	hsa-miR-148a-5p	0.861486834
ENST00000303407	ENSG00000169925 (BRD3)	BRD3	hsa-miR-148a-5p	0.861480829
ENST00000325885	ENSG00000005981 (ASB4)	ASB4	hsa-miR-148a-5p	0.861380583
ENST00000391611	ENSG00000126773 (PCNXL4)	PCNXL4	hsa-miR-148a-5p	0.861136215
ENST00000380250	ENSG00000073910 (FRY)	FRY	hsa-miR-148a-5p	0.860997752
ENST00000389484	ENSG00000168702 (LRP1B)	LRP1B	hsa-miR-148a-5p	0.860996905
ENST00000379261	ENSG00000048740 (CELF2)	CELF2	hsa-miR-148a-5p	0.860846445
ENST00000369415	ENSG00000025039 (RRAGD)	RRAGD	hsa-miR-148a-5p	0.860226979
ENST00000262065	ENSG00000108960 (MMD)	MMD	hsa-miR-148a-5p	0.860223803
ENST00000370759	ENSG00000137960 (GIPC2)	GIPC2	hsa-miR-148a-5p	0.860142071
ENST00000396667	ENSG00000106460 (TMEM106B)	TMEM106B	hsa-miR-148a-5p	0.859742213
ENST00000433060	ENSG00000166025 (AMOTL1)	AMOTL1	hsa-miR-148a-5p	0.859484836
ENST00000533486	ENSG00000137502 (RAB30)	RAB30	hsa-miR-148a-5p	0.859475311
ENST00000325437	ENSG00000103275 (UBE2I)	UBE2I	hsa-miR-148a-5p	0.858922155
ENST00000545279	ENSG00000113658 (SMAD5)	SMAD5	hsa-miR-148a-5p	0.858580899
ENST00000376351	ENSG00000151025 (GPR158)	GPR158	hsa-miR-148a-5p	0.858209718
ENST00000282077	ENSG00000152256 (PDK1)	PDK1	hsa-miR-148a-5p	0.85812671
ENST00000272313	ENSG00000138041 (SMEK2)	SMEK2	hsa-miR-148a-5p	0.857862176
ENST00000289788	ENSG00000187987 (ZSCAN23)	ZSCAN23	hsa-miR-148a-5p	0.857016518
ENST00000373659	ENSG00000186130 (ZBTB6)	ZBTB6	hsa-miR-148a-5p	0.857013879
ENST00000475377	ENSG00000157827 (FMNL2)	FMNL2	hsa-miR-148a-5p	0.856508023
ENST00000545826	ENSG00000168769 (TET2)	TET2	hsa-miR-148a-5p	0.855915533
ENST00000507232	ENSG00000040275 (SPDL1)	SPDL1	hsa-miR-148a-5p	0.855289774
ENST00000403263	ENSG00000114933 (INO80D)	INO80D	hsa-miR-148a-5p	0.854979335
ENST00000524717	ENSG00000184384 (MAML2)	MAML2	hsa-miR-148a-5p	0.85491085
ENST00000394885	ENSG00000117906 (RCN2)	RCN2	hsa-miR-148a-5p	0.854788183
ENST00000297324	ENSG00000164743 (C8orf48)	C8orf48	hsa-miR-148a-5p	0.854617981
ENST00000399848	ENSG00000168675 (LDLRAD4)	LDLRAD4	hsa-miR-148a-5p	0.854358368
ENST00000305425	ENSG00000165659 (DACH1)	DACH1	hsa-miR-148a-5p	0.854338625
ENST00000353265	ENSG00000178184 (PARD6G)	PARD6G	hsa-miR-148a-5p	0.854309379
ENST00000472616	ENSG00000006459 (KDM7A)	KDM7A	hsa-miR-148a-5p	0.854239216
ENST00000368417	ENSG00000188580 (NKAIN2)	NKAIN2	hsa-miR-148a-5p	0.854038111
ENST00000397832	ENSG00000214216 (IQCJ)	IQCJ	hsa-miR-148a-5p	0.853617827
ENST00000555997	ENSG00000185650 (ZFP36L1)	ZFP36L1	hsa-miR-148a-5p	0.853522191
ENST00000581161	ENSG00000176225 (RTTN)	RTTN	hsa-miR-148a-5p	0.853488572
ENST00000444614	ENSG00000151773 (CCDC122)	CCDC122	hsa-miR-148a-5p	0.853483518
ENST00000399220	ENSG00000168329 (CX3CR1)	CX3CR1	hsa-miR-148a-5p	0.853406081
ENST00000466544	ENSG00000189050 (RNFT1)	RNFT1	hsa-miR-148a-5p	0.853299618
ENST00000302000	ENSG00000171016 (PYGO1)	PYGO1	hsa-miR-148a-5p	0.852935291
ENST00000270162	ENSG00000142178 (SIK1)	SIK1	hsa-miR-148a-5p	0.852722768
ENST00000260197	ENSG00000137642 (SORL1)	SORL1	hsa-miR-148a-5p	0.852337216
ENST00000378053	ENSG00000125848 (FLRT3)	FLRT3	hsa-miR-148a-5p	0.852143199
ENST00000280333	ENSG00000150760 (DOCK1)	DOCK1	hsa-miR-148a-5p	0.851938691
ENST00000362004	ENSG00000109771 (LRP2BP)	LRP2BP	hsa-miR-148a-5p	0.851809325
ENST00000362003	ENSG00000185619 (PCGF3)	PCGF3	hsa-miR-148a-5p	0.851341506
ENST00000465289	ENSG00000117620 (SLC35A3)	SLC35A3	hsa-miR-148a-5p	0.851254295
ENST00000327925	ENSG00000205212 (CCDC144NL)	CCDC144NL	hsa-miR-148a-5p	0.85111355
ENST00000534180	ENSG00000167996 (FTH1)	FTH1	hsa-miR-148a-5p	0.850732695
ENST00000586438	ENSG00000184828 (ZBTB7C)	ZBTB7C	hsa-miR-148a-5p	0.850501338
ENST00000266517	ENSG00000139163 (ETNK1)	ETNK1	hsa-miR-148a-5p	0.850476087
ENST00000377636	ENSG00000136111 (TBC1D4)	TBC1D4	hsa-miR-148a-5p	0.850298888
ENST00000342320	ENSG00000168214 (RBPJ)	RBPJ	hsa-miR-148a-5p	0.850126592
ENST00000378814	ENSG00000137177 (KIF13A)	KIF13A	hsa-miR-148a-5p	0.849808521
ENST00000448454	ENSG00000243444 (PALM2)	PALM2	hsa-miR-148a-5p	0.849495265
ENST00000315249	ENSG00000092871 (RFFL)	RFFL	hsa-miR-148a-5p	0.849456543
ENST00000303965	ENSG00000047365 (ARAP2)	ARAP2	hsa-miR-148a-5p	0.849448224
ENST00000499810	ENSG00000120705 (ETF1)	ETF1	hsa-miR-148a-5p	0.849237698
ENST00000467136	ENSG00000157625 (TAB3)	TAB3	hsa-miR-148a-5p	0.849203018
ENST00000434267	ENSG00000047849 (MAP4)	MAP4	hsa-miR-148a-5p	0.848219694
ENST00000439947	ENSG00000171103 (TRMT61B)	TRMT61B	hsa-miR-148a-5p	0.847936302
ENST00000420228	ENSG00000236029 (AL953854.2)	AL953854.2	hsa-miR-148a-5p	0.847596039
ENST00000375898	ENSG00000139826 (ABHD13)	ABHD13	hsa-miR-148a-5p	0.847454812
ENST00000406053	ENSG00000115239 (GPR75-ASB3)	GPR75-ASB3	hsa-miR-148a-5p	0.846576019
ENST00000396068	ENSG00000011426 (ANLN)	ANLN	hsa-miR-148a-5p	0.8464285
ENST00000285518	ENSG00000155189 (AGPAT5)	AGPAT5	hsa-miR-148a-5p	0.846099699
ENST00000284727	ENSG00000154518 (ATP5G3)	ATP5G3	hsa-miR-148a-5p	0.845654169
ENST00000470487	ENSG00000173905 (GOLIM4)	GOLIM4	hsa-miR-148a-5p	0.84547118
ENST00000369969	ENSG00000121940 (CLCC1)	CLCC1	hsa-miR-148a-5p	0.845422255
ENST00000225719	ENSG00000108582 (CPD)	CPD	hsa-miR-148a-5p	0.84541104
ENST00000565116	ENSG00000260537 (RP11-529K1.3)	RP11-529K1.3	hsa-miR-148a-5p	0.845293792
ENST00000370471	ENSG00000102081 (FMR1)	FMR1	hsa-miR-148a-5p	0.845271845
ENST00000540712	ENSG00000165501 (LRR1)	LRR1	hsa-miR-148a-5p	0.845026399
ENST00000342449	ENSG00000185658 (BRWD1)	BRWD1	hsa-miR-148a-5p	0.844472067
ENST00000397906	ENSG00000100154 (TTC28)	TTC28	hsa-miR-148a-5p	0.843439755
ENST00000567507	ENSG00000176454 (LPCAT4)	LPCAT4	hsa-miR-148a-5p	0.843326037
ENST00000382869	ENSG00000121741 (ZMYM2)	ZMYM2	hsa-miR-148a-5p	0.843308272
ENST00000492094	ENSG00000181355 (OFCC1)	OFCC1	hsa-miR-148a-5p	0.843136114
ENST00000338920	ENSG00000117523 (PRRC2C)	PRRC2C	hsa-miR-148a-5p	0.842556943
ENST00000544357	ENSG00000229665 (PRR20C)	PRR20C	hsa-miR-148a-5p	0.842464353
ENST00000304743	ENSG00000100731 (PCNX)	PCNX	hsa-miR-148a-5p	0.842423583
ENST00000373275	ENSG00000165288 (BRWD3)	BRWD3	hsa-miR-148a-5p	0.842376364
ENST00000371160	ENSG00000101972 (STAG2)	STAG2	hsa-miR-148a-5p	0.842135949
ENST00000434815	ENSG00000234278 (PRR20E)	PRR20E	hsa-miR-148a-5p	0.841906731
ENST00000259569	ENSG00000137040 (RANBP6)	RANBP6	hsa-miR-148a-5p	0.841458793
ENST00000360820	ENSG00000136021 (SCYL2)	SCYL2	hsa-miR-148a-5p	0.840746843
ENST00000436139	ENSG00000138670 (RASGEF1B)	RASGEF1B	hsa-miR-148a-5p	0.840705545
ENST00000442267	ENSG00000109436 (TBC1D9)	TBC1D9	hsa-miR-148a-5p	0.840695482
ENST00000362012	ENSG00000095303 (PTGS1)	PTGS1	hsa-miR-148a-5p	0.84057184
ENST00000541121	ENSG00000138758 (SEPT11)	SEPT11	hsa-miR-148a-5p	0.84036796
ENST00000375712	ENSG00000101350 (KIF3B)	KIF3B	hsa-miR-148a-5p	0.840359346
ENST00000254821	ENSG00000132485 (ZRANB2)	ZRANB2	hsa-miR-148a-5p	0.840231005
ENST00000450366	ENSG00000115365 (LANCL1)	LANCL1	hsa-miR-148a-5p	0.839831055
ENST00000452123	ENSG00000227151 (PRR20D)	PRR20D	hsa-miR-148a-5p	0.8397553
ENST00000378609	ENSG00000078369 (GNB1)	GNB1	hsa-miR-148a-5p	0.839649523
ENST00000228495	ENSG00000110906 (KCTD10)	KCTD10	hsa-miR-148a-5p	0.839101731
ENST00000240093	ENSG00000104290 (FZD3)	FZD3	hsa-miR-148a-5p	0.83889257
ENST00000280527	ENSG00000150938 (CRIM1)	CRIM1	hsa-miR-148a-5p	0.838475635
ENST00000446231	ENSG00000157106 (SMG1)	SMG1	hsa-miR-148a-5p	0.838311537
ENST00000483536	ENSG00000139910 (NOVA1)	NOVA1	hsa-miR-148a-5p	0.838229467
ENST00000296795	ENSG00000164342 (TLR3)	TLR3	hsa-miR-148a-5p	0.838123502
ENST00000361487	ENSG00000198807 (PAX9)	PAX9	hsa-miR-148a-5p	0.838052957
ENST00000257181	ENSG00000134748 (PRPF38A)	PRPF38A	hsa-miR-148a-5p	0.837860172
ENST00000355619	ENSG00000005812 (FBXL3)	FBXL3	hsa-miR-148a-5p	0.837526706
ENST00000335251	ENSG00000164066 (INTU)	INTU	hsa-miR-148a-5p	0.837509137
ENST00000519565	ENSG00000146373 (RNF217)	RNF217	hsa-miR-148a-5p	0.837264233
ENST00000398148	ENSG00000088247 (KHSRP)	KHSRP	hsa-miR-148a-5p	0.837179326
ENST00000238616	ENSG00000119638 (NEK9)	NEK9	hsa-miR-148a-5p	0.836262082
ENST00000245304	ENSG00000125249 (RAP2A)	RAP2A	hsa-miR-148a-5p	0.836135085
ENST00000296328	ENSG00000163960 (UBXN7)	UBXN7	hsa-miR-148a-5p	0.835887738
ENST00000569719	ENSG00000205457 (TP53TG3C)	TP53TG3C	hsa-miR-148a-5p	0.835692448
ENST00000297338	ENSG00000164754 (RAD21)	RAD21	hsa-miR-148a-5p	0.835113858
ENST00000263238	ENSG00000115091 (ACTR3)	ACTR3	hsa-miR-148a-5p	0.83489941
ENST00000303569	ENSG00000160741 (CRTC2)	CRTC2	hsa-miR-148a-5p	0.833786526
ENST00000565622	ENSG00000183632 (TP53TG3)	TP53TG3	hsa-miR-148a-5p	0.833252845
ENST00000367478	ENSG00000047410 (TPR)	TPR	hsa-miR-148a-5p	0.833204105
ENST00000357731	ENSG00000172260 (NEGR1)	NEGR1	hsa-miR-148a-5p	0.832990295
ENST00000544216	ENSG00000257103 (LSM14A)	LSM14A	hsa-miR-148a-5p	0.832584276
ENST00000260970	ENSG00000138398 (PPIG)	PPIG	hsa-miR-148a-5p	0.832233632
ENST00000573314	ENSG00000138614 (VWA9)	VWA9	hsa-miR-148a-5p	0.832039504
ENST00000366535	ENSG00000035687 (ADSS)	ADSS	hsa-miR-148a-5p	0.831974528
ENST00000295851	ENSG00000138443 (ABI2)	ABI2	hsa-miR-148a-5p	0.83189462
ENST00000556029	ENSG00000120802 (TMPO)	TMPO	hsa-miR-148a-5p	0.831619625
ENST00000412050	ENSG00000107864 (CPEB3)	CPEB3	hsa-miR-148a-5p	0.831557211
ENST00000263713	ENSG00000115109 (EPB41L5)	EPB41L5	hsa-miR-148a-5p	0.831293703
ENST00000379380	ENSG00000186687 (LYRM7)	LYRM7	hsa-miR-148a-5p	0.831252772
ENST00000411426	ENSG00000189057 (FAM111B)	FAM111B	hsa-miR-148a-5p	0.830921401
ENST00000542843	ENSG00000187268 (FAM9C)	FAM9C	hsa-miR-148a-5p	0.830821348
ENST00000336079	ENSG00000067048 (DDX3Y)	DDX3Y	hsa-miR-148a-5p	0.830500695
ENST00000505065	ENSG00000158985 (CDC42SE2)	CDC42SE2	hsa-miR-148a-5p	0.830458895
ENST00000410026	ENSG00000173559 (NABP1)	NABP1	hsa-miR-148a-5p	0.83002253
ENST00000371828	ENSG00000124214 (STAU1)	STAU1	hsa-miR-148a-5p	0.829965824
ENST00000381337	ENSG00000066654 (THUMPD1)	THUMPD1	hsa-miR-148a-5p	0.829893538
ENST00000367455	ENSG00000116750 (UCHL5)	UCHL5	hsa-miR-148a-5p	0.829511627
ENST00000395996	ENSG00000132549 (VPS13B)	VPS13B	hsa-miR-148a-5p	0.828713807
ENST00000356554	ENSG00000198162 (MAN1A2)	MAN1A2	hsa-miR-148a-5p	0.82861208
ENST00000370521	ENSG00000065243 (PKN2)	PKN2	hsa-miR-148a-5p	0.828392587
ENST00000472487	ENSG00000162601 (MYSM1)	MYSM1	hsa-miR-148a-5p	0.82808613
ENST00000226328	ENSG00000018189 (RUFY3)	RUFY3	hsa-miR-148a-5p	0.828050809
ENST00000503288	ENSG00000145246 (ATP10D)	ATP10D	hsa-miR-148a-5p	0.82730107
ENST00000519065	ENSG00000196591 (HDAC2)	HDAC2	hsa-miR-148a-5p	0.827163158
ENST00000342287	ENSG00000167081 (PBX3)	PBX3	hsa-miR-148a-5p	0.827139384
ENST00000237853	ENSG00000118985 (ELL2)	ELL2	hsa-miR-148a-5p	0.827030669
ENST00000380031	ENSG00000120160 (EQTN)	EQTN	hsa-miR-148a-5p	0.826951913
ENST00000369248	ENSG00000151553 (FAM160B1)	FAM160B1	hsa-miR-148a-5p	0.82662751
ENST00000393256	ENSG00000153094 (BCL2L11)	BCL2L11	hsa-miR-148a-5p	0.826555329
ENST00000418698	ENSG00000141384 (TAF4B)	TAF4B	hsa-miR-148a-5p	0.826519234
ENST00000453304	ENSG00000182168 (UNC5C)	UNC5C	hsa-miR-148a-5p	0.825893944
ENST00000379565	ENSG00000177189 (RPS6KA3)	RPS6KA3	hsa-miR-148a-5p	0.825257183
ENST00000261507	ENSG00000052802 (MSMO1)	MSMO1	hsa-miR-148a-5p	0.825127503
ENST00000209875	ENSG00000094916 (CBX5)	CBX5	hsa-miR-148a-5p	0.825092857
ENST00000260641	ENSG00000138071 (ACTR2)	ACTR2	hsa-miR-148a-5p	0.825050462
ENST00000409155	ENSG00000148218 (ALAD)	ALAD	hsa-miR-148a-5p	0.824973934
ENST00000263895	ENSG00000115963 (RND3)	RND3	hsa-miR-148a-5p	0.824870934
ENST00000359878	ENSG00000155729 (KCTD18)	KCTD18	hsa-miR-148a-5p	0.824682577
ENST00000358399	ENSG00000119125 (GDA)	GDA	hsa-miR-148a-5p	0.824441043
ENST00000373020	ENSG00000000003 (TSPAN6)	TSPAN6	hsa-miR-148a-5p	0.824402509
ENST00000537512	ENSG00000136891 (TEX10)	TEX10	hsa-miR-148a-5p	0.824293279
ENST00000324198	ENSG00000100077 (ADRBK2)	ADRBK2	hsa-miR-148a-5p	0.823917672
ENST00000551461	ENSG00000139220 (PPFIA2)	PPFIA2	hsa-miR-148a-5p	0.823833062
ENST00000456523	ENSG00000138675 (FGF5)	FGF5	hsa-miR-148a-5p	0.823556494
ENST00000455997	ENSG00000211456 (SACM1L)	SACM1L	hsa-miR-148a-5p	0.82351357
ENST00000299518	ENSG00000166411 (IDH3A)	IDH3A	hsa-miR-148a-5p	0.823009346
ENST00000541722	ENSG00000109738 (GLRB)	GLRB	hsa-miR-148a-5p	0.822405209
ENST00000262999	ENSG00000109424 (UCP1)	UCP1	hsa-miR-148a-5p	0.822342745
ENST00000517956	ENSG00000156804 (FBXO32)	FBXO32	hsa-miR-148a-5p	0.822300061
ENST00000256637	ENSG00000134243 (SORT1)	SORT1	hsa-miR-148a-5p	0.821685395
ENST00000494124	ENSG00000137145 (DENND4C)	DENND4C	hsa-miR-148a-5p	0.821623628
ENST00000369448	ENSG00000183508 (FAM46C)	FAM46C	hsa-miR-148a-5p	0.821559328
ENST00000371953	ENSG00000171862 (PTEN)	PTEN	hsa-miR-148a-5p	0.821219759
ENST00000221130	ENSG00000104687 (GSR)	GSR	hsa-miR-148a-5p	0.82093262
ENST00000263708	ENSG00000088179 (PTPN4)	PTPN4	hsa-miR-148a-5p	0.820789231
ENST00000344922	ENSG00000154305 (MIA3)	MIA3	hsa-miR-148a-5p	0.820398313
ENST00000369902	ENSG00000107882 (SUFU)	SUFU	hsa-miR-148a-5p	0.820050037
ENST00000343713	ENSG00000091409 (ITGA6)	ITGA6	hsa-miR-148a-5p	0.819909991
ENST00000557924	ENSG00000137776 (SLTM)	SLTM	hsa-miR-148a-5p	0.819611341
ENST00000370014	ENSG00000112701 (SENP6)	SENP6	hsa-miR-148a-5p	0.819369344
ENST00000345714	ENSG00000104205 (SGK3)	SGK3	hsa-miR-148a-5p	0.81906306
ENST00000324894	ENSG00000130299 (GTPBP3)	GTPBP3	hsa-miR-148a-5p	0.819049284
ENST00000378700	ENSG00000172201 (ID4)	ID4	hsa-miR-148a-5p	0.819024634
ENST00000483328	ENSG00000162971 (TYW5)	TYW5	hsa-miR-148a-5p	0.818826326
ENST00000283875	ENSG00000153767 (GTF2E1)	GTF2E1	hsa-miR-148a-5p	0.818769246
ENST00000491143	ENSG00000119547 (ONECUT2)	ONECUT2	hsa-miR-148a-5p	0.818684468
ENST00000396423	ENSG00000164749 (HNF4G)	HNF4G	hsa-miR-148a-5p	0.818605355
ENST00000309733	ENSG00000174749 (C4orf32)	C4orf32	hsa-miR-148a-5p	0.818497559
ENST00000378746	ENSG00000131437 (KIF3A)	KIF3A	hsa-miR-148a-5p	0.818466957
ENST00000379887	ENSG00000166233 (ARIH1)	ARIH1	hsa-miR-148a-5p	0.81840911
ENST00000548125	ENSG00000151135 (C12orf23)	C12orf23	hsa-miR-148a-5p	0.818166242
ENST00000370457	ENSG00000155966 (AFF2)	AFF2	hsa-miR-148a-5p	0.817960521
ENST00000370141	ENSG00000122435 (TRMT13)	TRMT13	hsa-miR-148a-5p	0.817912207
ENST00000221086	ENSG00000104643 (MTMR9)	MTMR9	hsa-miR-148a-5p	0.817891525
ENST00000369144	ENSG00000107581 (EIF3A)	EIF3A	hsa-miR-148a-5p	0.81786883
ENST00000296519	ENSG00000164118 (CEP44)	CEP44	hsa-miR-148a-5p	0.817706887
ENST00000373985	ENSG00000185532 (PRKG1)	PRKG1	hsa-miR-148a-5p	0.81759711
ENST00000243326	ENSG00000080345 (RIF1)	RIF1	hsa-miR-148a-5p	0.817447707
ENST00000586293	ENSG00000196605 (ZNF846)	ZNF846	hsa-miR-148a-5p	0.817244481
ENST00000460129	ENSG00000157087 (ATP2B2)	ATP2B2	hsa-miR-148a-5p	0.817225736
ENST00000359358	ENSG00000197705 (KLHL14)	KLHL14	hsa-miR-148a-5p	0.81709246
ENST00000369849	ENSG00000148798 (INA)	INA	hsa-miR-148a-5p	0.817049843
ENST00000368026	ENSG00000158769 (F11R)	F11R	hsa-miR-148a-5p	0.817048583
ENST00000367590	ENSG00000143324 (XPR1)	XPR1	hsa-miR-148a-5p	0.816604671
ENST00000396893	ENSG00000197808 (ZNF461)	ZNF461	hsa-miR-148a-5p	0.816504916
ENST00000428443	ENSG00000187231 (SESTD1)	SESTD1	hsa-miR-148a-5p	0.816485746
ENST00000370353	ENSG00000130032 (PRRG3)	PRRG3	hsa-miR-148a-5p	0.816462409
ENST00000361320	ENSG00000198739 (LRRTM3)	LRRTM3	hsa-miR-148a-5p	0.816448766
ENST00000397239	ENSG00000124795 (DEK)	DEK	hsa-miR-148a-5p	0.816351941
ENST00000510089	ENSG00000164180 (TMEM161B)	TMEM161B	hsa-miR-148a-5p	0.816125387
ENST00000456208	ENSG00000179796 (LRRC3B)	LRRC3B	hsa-miR-148a-5p	0.816051175
ENST00000522965	ENSG00000104312 (RIPK2)	RIPK2	hsa-miR-148a-5p	0.816014631
ENST00000355237	ENSG00000197822 (OCLN)	OCLN	hsa-miR-148a-5p	0.815945741
ENST00000421556	ENSG00000068831 (RASGRP2)	RASGRP2	hsa-miR-148a-5p	0.815723076
ENST00000255194	ENSG00000132842 (AP3B1)	AP3B1	hsa-miR-148a-5p	0.815630171
ENST00000295633	ENSG00000163430 (FSTL1)	FSTL1	hsa-miR-148a-5p	0.815525676
ENST00000378572	ENSG00000165630 (PRPF18)	PRPF18	hsa-miR-148a-5p	0.815503188
ENST00000340811	ENSG00000057294 (PKP2)	PKP2	hsa-miR-148a-5p	0.815402405
ENST00000342579	ENSG00000171634 (BPTF)	BPTF	hsa-miR-148a-5p	0.815362099
ENST00000558083	ENSG00000151575 (TEX9)	TEX9	hsa-miR-148a-5p	0.814930495
ENST00000322002	ENSG00000176887 (SOX11)	SOX11	hsa-miR-148a-5p	0.814866312
ENST00000376352	ENSG00000166263 (STXBP4)	STXBP4	hsa-miR-148a-5p	0.81464196
ENST00000533482	ENSG00000113522 (RAD50)	RAD50	hsa-miR-148a-5p	0.814502819
ENST00000352083	ENSG00000110693 (SOX6)	SOX6	hsa-miR-148a-5p	0.814358868
ENST00000497979	ENSG00000135249 (RINT1)	RINT1	hsa-miR-148a-5p	0.814343238
ENST00000336273	ENSG00000147649 (MTDH)	MTDH	hsa-miR-148a-5p	0.814186851
ENST00000432057	ENSG00000028116 (VRK2)	VRK2	hsa-miR-148a-5p	0.81353443
ENST00000263672	ENSG00000118363 (SPCS2)	SPCS2	hsa-miR-148a-5p	0.813241026
ENST00000333104	ENSG00000185247 (MAGEA11)	MAGEA11	hsa-miR-148a-5p	0.813075703
ENST00000355496	ENSG00000105559 (PLEKHA4)	PLEKHA4	hsa-miR-148a-5p	0.813047503
ENST00000369651	ENSG00000135318 (NT5E)	NT5E	hsa-miR-148a-5p	0.8129491
ENST00000371610	ENSG00000124171 (PARD6B)	PARD6B	hsa-miR-148a-5p	0.812492571
ENST00000263967	ENSG00000121879 (PIK3CA)	PIK3CA	hsa-miR-148a-5p	0.812363067
ENST00000267622	ENSG00000100815 (TRIP11)	TRIP11	hsa-miR-148a-5p	0.811971008
ENST00000262039	ENSG00000078142 (PIK3C3)	PIK3C3	hsa-miR-148a-5p	0.811743469
ENST00000427179	ENSG00000145908 (ZNF300)	ZNF300	hsa-miR-148a-5p	0.811722849
ENST00000394123	ENSG00000145907 (G3BP1)	G3BP1	hsa-miR-148a-5p	0.811700874
ENST00000381039	ENSG00000122257 (RBBP6)	RBBP6	hsa-miR-148a-5p	0.811644732
ENST00000353487	ENSG00000157837 (SPPL3)	SPPL3	hsa-miR-148a-5p	0.811373773
ENST00000373758	ENSG00000165476 (REEP3)	REEP3	hsa-miR-148a-5p	0.811265465
ENST00000217244	ENSG00000101266 (CSNK2A1)	CSNK2A1	hsa-miR-148a-5p	0.811192144
ENST00000442720	ENSG00000129810 (SGOL1)	SGOL1	hsa-miR-148a-5p	0.811019477
ENST00000602526	ENSG00000106692 (FKTN)	FKTN	hsa-miR-148a-5p	0.810951436
ENST00000331327	ENSG00000185129 (PURA)	PURA	hsa-miR-148a-5p	0.810944158
ENST00000529410	ENSG00000198945 (L3MBTL3)	L3MBTL3	hsa-miR-148a-5p	0.810788301
ENST00000373535	ENSG00000146192 (FGD2)	FGD2	hsa-miR-148a-5p	0.810706502
ENST00000423644	ENSG00000188687 (SLC4A5)	SLC4A5	hsa-miR-148a-5p	0.81050046
ENST00000306006	ENSG00000196793 (ZNF239)	ZNF239	hsa-miR-148a-5p	0.81046944
ENST00000408939	ENSG00000196659 (TTC30B)	TTC30B	hsa-miR-148a-5p	0.810220782
ENST00000267294	ENSG00000139800 (ZIC5)	ZIC5	hsa-miR-148a-5p	0.810129864
ENST00000420857	ENSG00000102098 (SCML2)	SCML2	hsa-miR-148a-5p	0.810018722
ENST00000379938	ENSG00000124782 (RREB1)	RREB1	hsa-miR-148a-5p	0.810011232
ENST00000358704	ENSG00000179456 (ZBTB18)	ZBTB18	hsa-miR-148a-5p	0.809867801
ENST00000370282	ENSG00000117500 (TMED5)	TMED5	hsa-miR-148a-5p	0.809862029
ENST00000358154	ENSG00000197006 (METTL9)	METTL9	hsa-miR-148a-5p	0.809693422
ENST00000506823	ENSG00000174473 (GALNTL6)	GALNTL6	hsa-miR-148a-5p	0.809685713
ENST00000393140	ENSG00000175785 (PRIMA1)	PRIMA1	hsa-miR-148a-5p	0.809458143
ENST00000225737	ENSG00000108599 (AKAP10)	AKAP10	hsa-miR-148a-5p	0.808811062
ENST00000568604	ENSG00000166912 (MTMR10)	MTMR10	hsa-miR-148a-5p	0.808428616
ENST00000261491	ENSG00000102780 (DGKH)	DGKH	hsa-miR-148a-5p	0.808400851
ENST00000373008	ENSG00000122884 (P4HA1)	P4HA1	hsa-miR-148a-5p	0.808144601
ENST00000394266	ENSG00000103037 (SETD6)	SETD6	hsa-miR-148a-5p	0.807993663
ENST00000409137	ENSG00000150722 (PPP1R1C)	PPP1R1C	hsa-miR-148a-5p	0.807752165
ENST00000512003	ENSG00000186952 (TMEM232)	TMEM232	hsa-miR-148a-5p	0.807700972
ENST00000284274	ENSG00000154124 (FAM105B)	FAM105B	hsa-miR-148a-5p	0.807628093
ENST00000457946	ENSG00000146463 (ZMYM4)	ZMYM4	hsa-miR-148a-5p	0.80757336
ENST00000359314	ENSG00000198087 (CD2AP)	CD2AP	hsa-miR-148a-5p	0.807515385
ENST00000556422	ENSG00000070269 (TMEM260)	TMEM260	hsa-miR-148a-5p	0.806846657
ENST00000409672	ENSG00000169432 (SCN9A)	SCN9A	hsa-miR-148a-5p	0.806775825
ENST00000439174	ENSG00000120063 (GNA13)	GNA13	hsa-miR-148a-5p	0.806701687
ENST00000274496	ENSG00000145817 (YIPF5)	YIPF5	hsa-miR-148a-5p	0.806148212
ENST00000393386	ENSG00000106278 (PTPRZ1)	PTPRZ1	hsa-miR-148a-5p	0.806134318
ENST00000531380	ENSG00000174804 (FZD4)	FZD4	hsa-miR-148a-5p	0.806130335
ENST00000408953	ENSG00000221886 (C5orf54)	C5orf54	hsa-miR-148a-5p	0.806056557
ENST00000596742	ENSG00000254521 (SIGLEC12)	SIGLEC12	hsa-miR-148a-5p	0.806017237
ENST00000263563	ENSG00000107719 (PALD1)	PALD1	hsa-miR-148a-5p	0.805897266
ENST00000342788	ENSG00000178568 (ERBB4)	ERBB4	hsa-miR-148a-5p	0.805881679
ENST00000302495	ENSG00000169495 (HTRA4)	HTRA4	hsa-miR-148a-5p	0.805858779
ENST00000424843	ENSG00000147650 (LRP12)	LRP12	hsa-miR-148a-5p	0.805850679
ENST00000427635	ENSG00000148634 (HERC4)	HERC4	hsa-miR-148a-5p	0.805633793
ENST00000400324	ENSG00000139734 (DIAPH3)	DIAPH3	hsa-miR-148a-5p	0.805559539
ENST00000264211	ENSG00000075151 (EIF4G3)	EIF4G3	hsa-miR-148a-5p	0.805424436
ENST00000376625	ENSG00000185684 (EP400NL)	EP400NL	hsa-miR-148a-5p	0.805231262
ENST00000323327	ENSG00000179133 (C10orf67)	C10orf67	hsa-miR-148a-5p	0.80501272
ENST00000382872	ENSG00000165246 (NLGN4Y)	NLGN4Y	hsa-miR-148a-5p	0.804893698
ENST00000310826	ENSG00000173276 (ZBTB21)	ZBTB21	hsa-miR-148a-5p	0.804551147
ENST00000432079	ENSG00000116747 (TROVE2)	TROVE2	hsa-miR-148a-5p	0.804236131
ENST00000372661	ENSG00000185222 (WBP5)	WBP5	hsa-miR-148a-5p	0.803675567
ENST00000299977	ENSG00000166750 (SLFN5)	SLFN5	hsa-miR-148a-5p	0.803438572
ENST00000368090	ENSG00000143315 (PIGM)	PIGM	hsa-miR-148a-5p	0.803175709
ENST00000368468	ENSG00000111885 (MAN1A1)	MAN1A1	hsa-miR-148a-5p	0.803054495
ENST00000396062	ENSG00000100442 (FKBP3)	FKBP3	hsa-miR-148a-5p	0.802915207
ENST00000368323	ENSG00000143622 (RIT1)	RIT1	hsa-miR-148a-5p	0.802909902
ENST00000428527	ENSG00000018699 (TTC27)	TTC27	hsa-miR-148a-5p	0.80273882
ENST00000339834	ENSG00000166275 (C10orf32)	C10orf32	hsa-miR-148a-5p	0.80254751
ENST00000512733	ENSG00000163291 (PAQR3)	PAQR3	hsa-miR-148a-5p	0.802377327
ENST00000264360	ENSG00000138650 (PCDH10)	PCDH10	hsa-miR-148a-5p	0.802228279
ENST00000254442	ENSG00000091157 (WDR7)	WDR7	hsa-miR-148a-5p	0.802032494
ENST00000341460	ENSG00000097096 (SYDE2)	SYDE2	hsa-miR-148a-5p	0.801663397
ENST00000369709	ENSG00000116473 (RAP1A)	RAP1A	hsa-miR-148a-5p	0.801204267
ENST00000234453	ENSG00000116095 (PLEKHA3)	PLEKHA3	hsa-miR-148a-5p	0.801150252
ENST00000358064	ENSG00000197837 (HIST4H4)	HIST4H4	hsa-miR-148a-5p	0.801109992
ENST00000383836	ENSG00000196220 (SRGAP3)	SRGAP3	hsa-miR-148a-5p	0.800953171
ENST00000261530	ENSG00000089916 (GPATCH2L)	GPATCH2L	hsa-miR-148a-5p	0.800753109
ENST00000366882	ENSG00000112541 (PDE10A)	PDE10A	hsa-miR-148a-5p	0.800504348
ENST00000263795	ENSG00000092470 (WDR76)	WDR76	hsa-miR-148a-5p	0.800241676
ENST00000185150	ENSG00000068912 (ERLEC1)	ERLEC1	hsa-miR-148a-5p	0.800146018
ENST00000524135	ENSG00000185728 (YTHDF3)	YTHDF3	hsa-miR-148a-5p	0.800009316
ENST00000534820	ENSG00000109991 (P2RX3)	P2RX3	hsa-miR-148a-5p	0.799995698
ENST00000341041	ENSG00000153157 (SYCP2L)	SYCP2L	hsa-miR-148a-5p	0.798990408
ENST00000298746	ENSG00000165832 (TRUB1)	TRUB1	hsa-miR-148a-5p	0.79873795
ENST00000567951	ENSG00000090863 (GLG1)	GLG1	hsa-miR-148a-5p	0.79855131
ENST00000373954	ENSG00000009780 (FAM76A)	FAM76A	hsa-miR-148a-5p	0.798542277
ENST00000444303	ENSG00000133805 (AMPD3)	AMPD3	hsa-miR-148a-5p	0.797877694
ENST00000411772	ENSG00000067369 (TP53BP1)	TP53BP1	hsa-miR-148a-5p	0.797811677
ENST00000602710	ENSG00000170035 (UBE2E3)	UBE2E3	hsa-miR-148a-5p	0.797713491
ENST00000373036	ENSG00000188786 (MTF1)	MTF1	hsa-miR-148a-5p	0.797652147
ENST00000025301	ENSG00000023516 (AKAP11)	AKAP11	hsa-miR-148a-5p	0.797328795
ENST00000492143	ENSG00000106462 (EZH2)	EZH2	hsa-miR-148a-5p	0.797020941
ENST00000336838	ENSG00000115355 (CCDC88A)	CCDC88A	hsa-miR-148a-5p	0.796821342
ENST00000532808	ENSG00000023445 (BIRC3)	BIRC3	hsa-miR-148a-5p	0.796552316
ENST00000344327	ENSG00000137672 (TRPC6)	TRPC6	hsa-miR-148a-5p	0.796442595
ENST00000371132	ENSG00000124222 (STX16)	STX16	hsa-miR-148a-5p	0.796235657
ENST00000456098	ENSG00000017427 (IGF1)	IGF1	hsa-miR-148a-5p	0.796168495
ENST00000237281	ENSG00000118496 (FBXO30)	FBXO30	hsa-miR-148a-5p	0.796040675
ENST00000366592	ENSG00000077585 (GPR137B)	GPR137B	hsa-miR-148a-5p	0.795729003
ENST00000315033	ENSG00000181656 (GPR88)	GPR88	hsa-miR-148a-5p	0.795433909
ENST00000310613	ENSG00000173597 (SULT1B1)	SULT1B1	hsa-miR-148a-5p	0.795325795
ENST00000357727	ENSG00000146592 (CREB5)	CREB5	hsa-miR-148a-5p	0.79524397
ENST00000298232	ENSG00000166157 (TPTE)	TPTE	hsa-miR-148a-5p	0.795188843
ENST00000259963	ENSG00000137414 (FAM8A1)	FAM8A1	hsa-miR-148a-5p	0.795011505
ENST00000601957	ENSG00000168661 (ZNF30)	ZNF30	hsa-miR-148a-5p	0.794979658
ENST00000264235	ENSG00000082701 (GSK3B)	GSK3B	hsa-miR-148a-5p	0.794844522
ENST00000399298	ENSG00000196932 (TMEM26)	TMEM26	hsa-miR-148a-5p	0.79426098
ENST00000357172	ENSG00000134255 (CEPT1)	CEPT1	hsa-miR-148a-5p	0.79419253
ENST00000264313	ENSG00000109171 (SLAIN2)	SLAIN2	hsa-miR-148a-5p	0.794138804
ENST00000427704	ENSG00000112419 (PHACTR2)	PHACTR2	hsa-miR-148a-5p	0.794050516
ENST00000339659	ENSG00000157540 (DYRK1A)	DYRK1A	hsa-miR-148a-5p	0.793720072
ENST00000353267	ENSG00000118260 (CREB1)	CREB1	hsa-miR-148a-5p	0.793445561
ENST00000602168	ENSG00000269526 (ERVV-1)	ERVV-1	hsa-miR-148a-5p	0.79312177
ENST00000478722	ENSG00000171723 (GPHN)	GPHN	hsa-miR-148a-5p	0.793082622
ENST00000282020	ENSG00000152208 (GRID2)	GRID2	hsa-miR-148a-5p	0.792887503
ENST00000282570	ENSG00000087338 (GMCL1)	GMCL1	hsa-miR-148a-5p	0.792621007
ENST00000560809	ENSG00000128833 (MYO5C)	MYO5C	hsa-miR-148a-5p	0.792612567
ENST00000310528	ENSG00000165416 (SUGT1)	SUGT1	hsa-miR-148a-5p	0.792588737
ENST00000370509	ENSG00000143162 (CREG1)	CREG1	hsa-miR-148a-5p	0.792477232
ENST00000436411	ENSG00000105865 (DUS4L)	DUS4L	hsa-miR-148a-5p	0.792424979
ENST00000586178	ENSG00000011258 (MBTD1)	MBTD1	hsa-miR-148a-5p	0.79212283
ENST00000413869	ENSG00000196083 (IL1RAP)	IL1RAP	hsa-miR-148a-5p	0.792119364
ENST00000399793	ENSG00000154153 (FAM134B)	FAM134B	hsa-miR-148a-5p	0.79208202
ENST00000541475	ENSG00000076053 (RBM7)	RBM7	hsa-miR-148a-5p	0.791703407
ENST00000490910	ENSG00000101343 (CRNKL1)	CRNKL1	hsa-miR-148a-5p	0.791564111
ENST00000202816	ENSG00000089048 (ESF1)	ESF1	hsa-miR-148a-5p	0.791558053
ENST00000466382	ENSG00000117713 (ARID1A)	ARID1A	hsa-miR-148a-5p	0.791478788
ENST00000520539	ENSG00000104517 (UBR5)	UBR5	hsa-miR-148a-5p	0.791266237
ENST00000209728	ENSG00000094804 (CDC6)	CDC6	hsa-miR-148a-5p	0.791055179
ENST00000505342	ENSG00000145362 (ANK2)	ANK2	hsa-miR-148a-5p	0.791027976
ENST00000467908	ENSG00000160209 (PDXK)	PDXK	hsa-miR-148a-5p	0.79099675
ENST00000344517	ENSG00000135776 (ABCB10)	ABCB10	hsa-miR-148a-5p	0.790991418
ENST00000284881	ENSG00000154642 (C21orf91)	C21orf91	hsa-miR-148a-5p	0.790844624
ENST00000219905	ENSG00000174197 (MGA)	MGA	hsa-miR-148a-5p	0.79067312
ENST00000295025	ENSG00000162924 (REL)	REL	hsa-miR-148a-5p	0.790584783
ENST00000529945	ENSG00000178104 (PDE4DIP)	PDE4DIP	hsa-miR-148a-5p	0.79058209
ENST00000425699	ENSG00000188613 (NANOS1)	NANOS1	hsa-miR-148a-5p	0.790072059
ENST00000284037	ENSG00000112851 (ERBB2IP)	ERBB2IP	hsa-miR-148a-5p	0.789937384
ENST00000503133	ENSG00000143624 (INTS3)	INTS3	hsa-miR-148a-5p	0.789892299
ENST00000316448	ENSG00000179218 (CALR)	CALR	hsa-miR-148a-5p	0.789876717
ENST00000573331	ENSG00000262481 (C17orf61-PLSCR3)	C17orf61-PLSCR3	hsa-miR-148a-5p	0.789648192
ENST00000354650	ENSG00000010810 (FYN)	FYN	hsa-miR-148a-5p	0.789642414
ENST00000296786	ENSG00000164332 (UBLCP1)	UBLCP1	hsa-miR-148a-5p	0.789602627
ENST00000321358	ENSG00000065978 (YBX1)	YBX1	hsa-miR-148a-5p	0.789473015
ENST00000442018	ENSG00000183337 (BCOR)	BCOR	hsa-miR-148a-5p	0.78940835
ENST00000513482	ENSG00000051596 (THOC3)	THOC3	hsa-miR-148a-5p	0.789218841
ENST00000338682	ENSG00000189127 (ANKRD34B)	ANKRD34B	hsa-miR-148a-5p	0.789211205
ENST00000317627	ENSG00000177994 (C2orf73)	C2orf73	hsa-miR-148a-5p	0.789084394
ENST00000321599	ENSG00000176095 (IP6K1)	IP6K1	hsa-miR-148a-5p	0.789027937
ENST00000374810	ENSG00000078804 (TP53INP2)	TP53INP2	hsa-miR-148a-5p	0.788916186
ENST00000372782	ENSG00000166432 (ZMAT1)	ZMAT1	hsa-miR-148a-5p	0.788765007
ENST00000243222	ENSG00000123500 (COL10A1)	COL10A1	hsa-miR-148a-5p	0.788592558
ENST00000311550	ENSG00000166206 (GABRB3)	GABRB3	hsa-miR-148a-5p	0.788387347
ENST00000420304	ENSG00000143768 (LEFTY2)	LEFTY2	hsa-miR-148a-5p	0.788336535
ENST00000247461	ENSG00000127022 (CANX)	CANX	hsa-miR-148a-5p	0.788238674
ENST00000526755	ENSG00000168522 (FNTA)	FNTA	hsa-miR-148a-5p	0.788217808
ENST00000312561	ENSG00000174718 (KIAA1551)	KIAA1551	hsa-miR-148a-5p	0.78811663
ENST00000441719	ENSG00000115548 (KDM3A)	KDM3A	hsa-miR-148a-5p	0.787959031
ENST00000258526	ENSG00000136040 (PLXNC1)	PLXNC1	hsa-miR-148a-5p	0.787828566
ENST00000377930	ENSG00000204918 (PRR20B)	PRR20B	hsa-miR-148a-5p	0.787588337
ENST00000219022	ENSG00000102837 (OLFM4)	OLFM4	hsa-miR-148a-5p	0.787557127
ENST00000379073	ENSG00000118557 (PMFBP1)	PMFBP1	hsa-miR-148a-5p	0.787554506
ENST00000407540	ENSG00000132031 (MATN3)	MATN3	hsa-miR-148a-5p	0.787550423
ENST00000382292	ENSG00000151835 (SACS)	SACS	hsa-miR-148a-5p	0.787278787
ENST00000376070	ENSG00000107890 (ANKRD26)	ANKRD26	hsa-miR-148a-5p	0.786745391
ENST00000369452	ENSG00000108061 (SHOC2)	SHOC2	hsa-miR-148a-5p	0.786489883
ENST00000372037	ENSG00000107779 (BMPR1A)	BMPR1A	hsa-miR-148a-5p	0.786458418
ENST00000262844	ENSG00000101935 (AMMECR1)	AMMECR1	hsa-miR-148a-5p	0.786435791
ENST00000379919	ENSG00000180660 (MAB21L1)	MAB21L1	hsa-miR-148a-5p	0.786107852
ENST00000310827	ENSG00000136485 (DCAF7)	DCAF7	hsa-miR-148a-5p	0.786054567
ENST00000377122	ENSG00000078114 (NEBL)	NEBL	hsa-miR-148a-5p	0.785964513
ENST00000187762	ENSG00000072954 (TMEM38A)	TMEM38A	hsa-miR-148a-5p	0.78545693
ENST00000335508	ENSG00000115524 (SF3B1)	SF3B1	hsa-miR-148a-5p	0.785382983
ENST00000338754	ENSG00000128294 (TPST2)	TPST2	hsa-miR-148a-5p	0.785226708
ENST00000423485	ENSG00000131747 (TOP2A)	TOP2A	hsa-miR-148a-5p	0.784938371
ENST00000305123	ENSG00000169047 (IRS1)	IRS1	hsa-miR-148a-5p	0.784728577
ENST00000260585	ENSG00000138018 (EPT1)	EPT1	hsa-miR-148a-5p	0.784670688
ENST00000359242	ENSG00000122417 (ODF2L)	ODF2L	hsa-miR-148a-5p	0.784507905
ENST00000328086	ENSG00000155592 (ZKSCAN2)	ZKSCAN2	hsa-miR-148a-5p	0.784196915
ENST00000327040	ENSG00000156011 (PSD3)	PSD3	hsa-miR-148a-5p	0.783536439
ENST00000333957	ENSG00000111731 (C2CD5)	C2CD5	hsa-miR-148a-5p	0.783503741
ENST00000551118	ENSG00000138346 (DNA2)	DNA2	hsa-miR-148a-5p	0.783155131
ENST00000480294	ENSG00000272162 (RP11-637O19.3)	RP11-637O19.3	hsa-miR-148a-5p	0.783102371
ENST00000375011	ENSG00000119514 (GALNT12)	GALNT12	hsa-miR-148a-5p	0.783049524
ENST00000550383	ENSG00000257950 (P2RX5-TAX1BP3)	P2RX5-TAX1BP3	hsa-miR-148a-5p	0.782747995
ENST00000357464	ENSG00000121274 (PAPD5)	PAPD5	hsa-miR-148a-5p	0.782654658
ENST00000449264	ENSG00000232810 (TNF)	TNF	hsa-miR-148a-5p	0.782146021
ENST00000266671	ENSG00000139289 (PHLDA1)	PHLDA1	hsa-miR-148a-5p	0.782090043
ENST00000311623	ENSG00000174792 (C4orf26)	C4orf26	hsa-miR-148a-5p	0.781955506
ENST00000426016	ENSG00000115904 (SOS1)	SOS1	hsa-miR-148a-5p	0.781916164
ENST00000239761	ENSG00000120586 (MRC1)	MRC1	hsa-miR-148a-5p	0.78188783
ENST00000536984	ENSG00000081138 (CDH7)	CDH7	hsa-miR-148a-5p	0.781839292
ENST00000306846	ENSG00000172239 (PAIP1)	PAIP1	hsa-miR-148a-5p	0.781796398
ENST00000399251	ENSG00000171988 (JMJD1C)	JMJD1C	hsa-miR-148a-5p	0.781752043
ENST00000345094	ENSG00000134077 (THUMPD3)	THUMPD3	hsa-miR-148a-5p	0.781745367
ENST00000378694	ENSG00000065328 (MCM10)	MCM10	hsa-miR-148a-5p	0.78158762
ENST00000309395	ENSG00000173542 (MOB1B)	MOB1B	hsa-miR-148a-5p	0.781586936
ENST00000333141	ENSG00000182308 (DCAF4L1)	DCAF4L1	hsa-miR-148a-5p	0.781168837
ENST00000370203	ENSG00000152078 (TMEM56)	TMEM56	hsa-miR-148a-5p	0.780914623
ENST00000398637	ENSG00000111371 (SLC38A1)	SLC38A1	hsa-miR-148a-5p	0.78077568
ENST00000509670	ENSG00000173040 (EVC2)	EVC2	hsa-miR-148a-5p	0.78067122
ENST00000360093	ENSG00000153253 (SCN3A)	SCN3A	hsa-miR-148a-5p	0.780625298
ENST00000331429	ENSG00000183748 (MRC1L1)	MRC1L1	hsa-miR-148a-5p	0.780554382
ENST00000470495	ENSG00000120093 (HOXB3)	HOXB3	hsa-miR-148a-5p	0.780540318
ENST00000340652	ENSG00000188730 (VWC2)	VWC2	hsa-miR-148a-5p	0.780446079
ENST00000512091	ENSG00000150471 (LPHN3)	LPHN3	hsa-miR-148a-5p	0.780282213
ENST00000322313	ENSG00000136709 (WDR33)	WDR33	hsa-miR-148a-5p	0.780249998
ENST00000357430	ENSG00000123983 (ACSL3)	ACSL3	hsa-miR-148a-5p	0.780014799
ENST00000284202	ENSG00000154059 (IMPACT)	IMPACT	hsa-miR-148a-5p	0.779699167
ENST00000536965	ENSG00000143669 (LYST)	LYST	hsa-miR-148a-5p	0.77953015
ENST00000380110	ENSG00000107105 (ELAVL2)	ELAVL2	hsa-miR-148a-5p	0.779492217
ENST00000434391	ENSG00000117682 (DHDDS)	DHDDS	hsa-miR-148a-5p	0.779482976
ENST00000356692	ENSG00000163605 (PPP4R2)	PPP4R2	hsa-miR-148a-5p	0.77948179
ENST00000357214	ENSG00000116560 (SFPQ)	SFPQ	hsa-miR-148a-5p	0.779272085
ENST00000379052	ENSG00000112183 (RBM24)	RBM24	hsa-miR-148a-5p	0.779230825
ENST00000335727	ENSG00000100354 (TNRC6B)	TNRC6B	hsa-miR-148a-5p	0.779117208
ENST00000370790	ENSG00000156504 (FAM122B)	FAM122B	hsa-miR-148a-5p	0.779052778
ENST00000388822	ENSG00000145388 (METTL14)	METTL14	hsa-miR-148a-5p	0.778909459
ENST00000395715	ENSG00000104447 (TRPS1)	TRPS1	hsa-miR-148a-5p	0.778894202
ENST00000287482	ENSG00000156876 (SASS6)	SASS6	hsa-miR-148a-5p	0.77872373
ENST00000380043	ENSG00000047634 (SCML1)	SCML1	hsa-miR-148a-5p	0.778686582
ENST00000262644	ENSG00000104331 (IMPAD1)	IMPAD1	hsa-miR-148a-5p	0.778646996
ENST00000296755	ENSG00000131711 (MAP1B)	MAP1B	hsa-miR-148a-5p	0.778615488
ENST00000509633	ENSG00000187533 (C4orf40)	C4orf40	hsa-miR-148a-5p	0.778404964
ENST00000271308	ENSG00000143106 (PSMA5)	PSMA5	hsa-miR-148a-5p	0.778301556
ENST00000315870	ENSG00000071243 (ING3)	ING3	hsa-miR-148a-5p	0.777980436
ENST00000483235	ENSG00000118007 (STAG1)	STAG1	hsa-miR-148a-5p	0.777851996
ENST00000276570	ENSG00000147570 (DNAJC5B)	DNAJC5B	hsa-miR-148a-5p	0.777694008
ENST00000262646	ENSG00000104388 (RAB2A)	RAB2A	hsa-miR-148a-5p	0.777457138
ENST00000244745	ENSG00000124766 (SOX4)	SOX4	hsa-miR-148a-5p	0.777389287
ENST00000261592	ENSG00000101746 (NOL4)	NOL4	hsa-miR-148a-5p	0.776987164
ENST00000502613	ENSG00000138756 (BMP2K)	BMP2K	hsa-miR-148a-5p	0.776764115
ENST00000367875	ENSG00000143157 (POGK)	POGK	hsa-miR-148a-5p	0.776483036
ENST00000318578	ENSG00000175746 (C15orf54)	C15orf54	hsa-miR-148a-5p	0.776245036
ENST00000367390	ENSG00000143355 (LHX9)	LHX9	hsa-miR-148a-5p	0.776040787
ENST00000346477	ENSG00000105492 (SIGLEC6)	SIGLEC6	hsa-miR-148a-5p	0.775902107
ENST00000515800	ENSG00000145715 (RASA1)	RASA1	hsa-miR-148a-5p	0.775818963
ENST00000369301	ENSG00000196865 (NHLRC2)	NHLRC2	hsa-miR-148a-5p	0.775793822
ENST00000373210	ENSG00000134698 (AGO4)	AGO4	hsa-miR-148a-5p	0.775753439
ENST00000494664	ENSG00000113845 (TIMMDC1)	TIMMDC1	hsa-miR-148a-5p	0.775713982
ENST00000338983	ENSG00000091436 (MLTK)	MLTK	hsa-miR-148a-5p	0.775529419
ENST00000484074	ENSG00000102531 (FNDC3A)	FNDC3A	hsa-miR-148a-5p	0.775486475
ENST00000593983	ENSG00000243130 (PSG11)	PSG11	hsa-miR-148a-5p	0.775377454
ENST00000456829	ENSG00000110002 (VWA5A)	VWA5A	hsa-miR-148a-5p	0.77535294
ENST00000277141	ENSG00000083223 (ZCCHC6)	ZCCHC6	hsa-miR-148a-5p	0.775326201
ENST00000282701	ENSG00000152785 (BMP3)	BMP3	hsa-miR-148a-5p	0.775041221
ENST00000390666	ENSG00000212122 (TSSK1B)	TSSK1B	hsa-miR-148a-5p	0.775025134
ENST00000374720	ENSG00000070214 (SLC44A1)	SLC44A1	hsa-miR-148a-5p	0.774874408
ENST00000423484	ENSG00000234444 (ZNF736)	ZNF736	hsa-miR-148a-5p	0.774425483
ENST00000261537	ENSG00000101752 (MIB1)	MIB1	hsa-miR-148a-5p	0.774407376
ENST00000377211	ENSG00000136160 (EDNRB)	EDNRB	hsa-miR-148a-5p	0.774035414
ENST00000265162	ENSG00000138792 (ENPEP)	ENPEP	hsa-miR-148a-5p	0.773978113
ENST00000520547	ENSG00000253626 (EIF5AL1)	EIF5AL1	hsa-miR-148a-5p	0.773915948
ENST00000491895	ENSG00000131979 (GCH1)	GCH1	hsa-miR-148a-5p	0.773891994
ENST00000381434	ENSG00000137033 (IL33)	IL33	hsa-miR-148a-5p	0.773807649
ENST00000357613	ENSG00000166822 (TMEM170A)	TMEM170A	hsa-miR-148a-5p	0.773541998
ENST00000246646	ENSG00000171360 (KRT38)	KRT38	hsa-miR-148a-5p	0.773539149
ENST00000186436	ENSG00000075568 (TMEM131)	TMEM131	hsa-miR-148a-5p	0.773207128
ENST00000401394	ENSG00000102974 (CTCF)	CTCF	hsa-miR-148a-5p	0.77303467
ENST00000337198	ENSG00000155096 (AZIN1)	AZIN1	hsa-miR-148a-5p	0.772837362
ENST00000353411	ENSG00000113558 (SKP1)	SKP1	hsa-miR-148a-5p	0.772542519
ENST00000445281	ENSG00000188729 (OSTN)	OSTN	hsa-miR-148a-5p	0.772076745
ENST00000429175	ENSG00000151702 (FLI1)	FLI1	hsa-miR-148a-5p	0.771933166
ENST00000261023	ENSG00000138448 (ITGAV)	ITGAV	hsa-miR-148a-5p	0.771605011
ENST00000375290	ENSG00000185920 (PTCH1)	PTCH1	hsa-miR-148a-5p	0.771453654
ENST00000400202	ENSG00000180530 (NRIP1)	NRIP1	hsa-miR-148a-5p	0.771380382
ENST00000368557	ENSG00000183807 (FAM162B)	FAM162B	hsa-miR-148a-5p	0.771193703
ENST00000259939	ENSG00000137393 (RNF144B)	RNF144B	hsa-miR-148a-5p	0.771184949
ENST00000417640	ENSG00000123119 (NECAB1)	NECAB1	hsa-miR-148a-5p	0.771178655
ENST00000332822	ENSG00000183691 (NOG)	NOG	hsa-miR-148a-5p	0.771161617
ENST00000314136	ENSG00000143401 (ANP32E)	ANP32E	hsa-miR-148a-5p	0.770893197
ENST00000354340	ENSG00000062370 (ZNF112)	ZNF112	hsa-miR-148a-5p	0.770870815
ENST00000435962	ENSG00000165929 (TC2N)	TC2N	hsa-miR-148a-5p	0.770810418
ENST00000437887	ENSG00000233863 (AC012215.1)	AC012215.1	hsa-miR-148a-5p	0.770787926
ENST00000005260	ENSG00000006453 (BAIAP2L1)	BAIAP2L1	hsa-miR-148a-5p	0.769921738
ENST00000373519	ENSG00000186288 (PABPC1L2A)	PABPC1L2A	hsa-miR-148a-5p	0.769921493
ENST00000339843	ENSG00000106258 (CYP3A5)	CYP3A5	hsa-miR-148a-5p	0.769900509
ENST00000561081	ENSG00000137821 (LRRC49)	LRRC49	hsa-miR-148a-5p	0.769846451
ENST00000286794	ENSG00000156269 (NAA11)	NAA11	hsa-miR-148a-5p	0.769799965
ENST00000322954	ENSG00000137831 (UACA)	UACA	hsa-miR-148a-5p	0.769699424
ENST00000302550	ENSG00000121644 (DESI2)	DESI2	hsa-miR-148a-5p	0.769499448
ENST00000448150	ENSG00000075391 (RASAL2)	RASAL2	hsa-miR-148a-5p	0.769430438
ENST00000442101	ENSG00000120690 (ELF1)	ELF1	hsa-miR-148a-5p	0.769036747
ENST00000482983	ENSG00000166582 (CENPV)	CENPV	hsa-miR-148a-5p	0.768793959
ENST00000452508	ENSG00000149311 (ATM)	ATM	hsa-miR-148a-5p	0.768670671
ENST00000261401	ENSG00000110880 (CORO1C)	CORO1C	hsa-miR-148a-5p	0.768630965
ENST00000361432	ENSG00000119979 (FAM45A)	FAM45A	hsa-miR-148a-5p	0.768607513
ENST00000198767	ENSG00000085721 (RRN3)	RRN3	hsa-miR-148a-5p	0.768600771
ENST00000340385	ENSG00000117592 (PRDX6)	PRDX6	hsa-miR-148a-5p	0.768263024
ENST00000401827	ENSG00000205268 (PDE7A)	PDE7A	hsa-miR-148a-5p	0.7680613
ENST00000239926	ENSG00000120729 (MYOT)	MYOT	hsa-miR-148a-5p	0.767980686
ENST00000382021	ENSG00000168724 (DNAJC21)	DNAJC21	hsa-miR-148a-5p	0.767974483
ENST00000230658	ENSG00000016082 (ISL1)	ISL1	hsa-miR-148a-5p	0.767973452
ENST00000274063	ENSG00000145423 (SFRP2)	SFRP2	hsa-miR-148a-5p	0.767886214
ENST00000402905	ENSG00000138380 (CARF)	CARF	hsa-miR-148a-5p	0.767117515
ENST00000375078	ENSG00000162545 (CAMK2N1)	CAMK2N1	hsa-miR-148a-5p	0.767096533
ENST00000262126	ENSG00000101745 (ANKRD12)	ANKRD12	hsa-miR-148a-5p	0.767071397
ENST00000373493	ENSG00000162521 (RBBP4)	RBBP4	hsa-miR-148a-5p	0.767025739
ENST00000241416	ENSG00000121989 (ACVR2A)	ACVR2A	hsa-miR-148a-5p	0.766740011
ENST00000233946	ENSG00000115594 (IL1R1)	IL1R1	hsa-miR-148a-5p	0.766623316
ENST00000449886	ENSG00000169155 (ZBTB43)	ZBTB43	hsa-miR-148a-5p	0.766505516
ENST00000381095	ENSG00000146938 (NLGN4X)	NLGN4X	hsa-miR-148a-5p	0.766227168
ENST00000402676	ENSG00000131016 (AKAP12)	AKAP12	hsa-miR-148a-5p	0.766210294
ENST00000443444	ENSG00000170160 (CCDC144A)	CCDC144A	hsa-miR-148a-5p	0.765922219
ENST00000323468	ENSG00000178202 (KDELC2)	KDELC2	hsa-miR-148a-5p	0.765771201
ENST00000312521	ENSG00000174738 (NR1D2)	NR1D2	hsa-miR-148a-5p	0.765645549
ENST00000360971	ENSG00000197594 (ENPP1)	ENPP1	hsa-miR-148a-5p	0.765313415
ENST00000393483	ENSG00000135951 (TSGA10)	TSGA10	hsa-miR-148a-5p	0.765283618
ENST00000374692	ENSG00000095209 (TMEM38B)	TMEM38B	hsa-miR-148a-5p	0.765064165
ENST00000593114	ENSG00000179262 (RAD23A)	RAD23A	hsa-miR-148a-5p	0.76497525
ENST00000405786	ENSG00000147533 (GOLGA7)	GOLGA7	hsa-miR-148a-5p	0.764721997
ENST00000309052	ENSG00000172954 (LCLAT1)	LCLAT1	hsa-miR-148a-5p	0.764670517
ENST00000400256	ENSG00000158270 (COLEC12)	COLEC12	hsa-miR-148a-5p	0.76457055
ENST00000376344	ENSG00000165118 (C9orf64)	C9orf64	hsa-miR-148a-5p	0.764457542
ENST00000296564	ENSG00000164151 (KIAA0947)	KIAA0947	hsa-miR-148a-5p	0.764361268
ENST00000517311	ENSG00000120533 (ENY2)	ENY2	hsa-miR-148a-5p	0.764348232
ENST00000262940	ENSG00000105808 (RASA4)	RASA4	hsa-miR-148a-5p	0.76432982
ENST00000395443	ENSG00000198218 (QRICH1)	QRICH1	hsa-miR-148a-5p	0.764232059
ENST00000588692	ENSG00000123136 (DDX39A)	DDX39A	hsa-miR-148a-5p	0.764084096
ENST00000354981	ENSG00000089177 (KIF16B)	KIF16B	hsa-miR-148a-5p	0.764065987
ENST00000361272	ENSG00000198791 (CNOT7)	CNOT7	hsa-miR-148a-5p	0.763695166
ENST00000392995	ENSG00000170836 (PPM1D)	PPM1D	hsa-miR-148a-5p	0.763498133
ENST00000273854	ENSG00000145242 (EPHA5)	EPHA5	hsa-miR-148a-5p	0.763166198
ENST00000412718	ENSG00000214562 (NUTM2D)	NUTM2D	hsa-miR-148a-5p	0.763084154
ENST00000550746	ENSG00000121749 (TBC1D15)	TBC1D15	hsa-miR-148a-5p	0.762986483
ENST00000478691	ENSG00000125944 (HNRNPR)	HNRNPR	hsa-miR-148a-5p	0.762850158
ENST00000358604	ENSG00000136682 (CBWD2)	CBWD2	hsa-miR-148a-5p	0.762837741
ENST00000392485	ENSG00000161547 (SRSF2)	SRSF2	hsa-miR-148a-5p	0.76279488
ENST00000326639	ENSG00000138709 (LARP1B)	LARP1B	hsa-miR-148a-5p	0.762733777
ENST00000333407	ENSG00000133477 (FAM83F)	FAM83F	hsa-miR-148a-5p	0.762577704
ENST00000409018	ENSG00000081177 (EXD2)	EXD2	hsa-miR-148a-5p	0.762569904
ENST00000371497	ENSG00000182463 (TSHZ2)	TSHZ2	hsa-miR-148a-5p	0.76229332
ENST00000299163	ENSG00000166135 (HIF1AN)	HIF1AN	hsa-miR-148a-5p	0.762284048
ENST00000377126	ENSG00000119138 (KLF9)	KLF9	hsa-miR-148a-5p	0.762227589
ENST00000339140	ENSG00000189299 (FOXR2)	FOXR2	hsa-miR-148a-5p	0.762044043
ENST00000268719	ENSG00000141034 (GID4)	GID4	hsa-miR-148a-5p	0.761973241
ENST00000348370	ENSG00000157450 (RNF111)	RNF111	hsa-miR-148a-5p	0.761966304
ENST00000369603	ENSG00000119953 (SMNDC1)	SMNDC1	hsa-miR-148a-5p	0.761953548
ENST00000375561	ENSG00000106809 (OGN)	OGN	hsa-miR-148a-5p	0.761923379
ENST00000536656	ENSG00000171608 (PIK3CD)	PIK3CD	hsa-miR-148a-5p	0.761860983
ENST00000216185	ENSG00000100348 (TXN2)	TXN2	hsa-miR-148a-5p	0.761722771
ENST00000413150	ENSG00000071054 (MAP4K4)	MAP4K4	hsa-miR-148a-5p	0.761646271
ENST00000256015	ENSG00000133639 (BTG1)	BTG1	hsa-miR-148a-5p	0.761581747
ENST00000370918	ENSG00000012660 (ELOVL5)	ELOVL5	hsa-miR-148a-5p	0.761258441
ENST00000355832	ENSG00000225830 (ERCC6)	ERCC6	hsa-miR-148a-5p	0.761058651
ENST00000513432	ENSG00000101639 (CEP192)	CEP192	hsa-miR-148a-5p	0.761044869
ENST00000510659	ENSG00000082213 (C5orf22)	C5orf22	hsa-miR-148a-5p	0.761011126
ENST00000416269	ENSG00000106648 (GALNTL5)	GALNTL5	hsa-miR-148a-5p	0.761008508
ENST00000366911	ENSG00000026652 (AGPAT4)	AGPAT4	hsa-miR-148a-5p	0.76082811
ENST00000370895	ENSG00000259030 (FPGT-TNNI3K)	FPGT-TNNI3K	hsa-miR-148a-5p	0.760791549
ENST00000326225	ENSG00000153207 (AHCTF1)	AHCTF1	hsa-miR-148a-5p	0.760767484
ENST00000341119	ENSG00000075303 (SLC25A40)	SLC25A40	hsa-miR-148a-5p	0.760695828
ENST00000310389	ENSG00000175414 (ARL10)	ARL10	hsa-miR-148a-5p	0.760656606
ENST00000259154	ENSG00000136636 (KCTD3)	KCTD3	hsa-miR-148a-5p	0.760520768
ENST00000378628	ENSG00000130962 (PRRG1)	PRRG1	hsa-miR-148a-5p	0.760434917
ENST00000379834	ENSG00000124784 (RIOK1)	RIOK1	hsa-miR-148a-5p	0.759966206
ENST00000332853	ENSG00000165633 (VSTM4)	VSTM4	hsa-miR-148a-5p	0.759876983
ENST00000231004	ENSG00000113083 (LOX)	LOX	hsa-miR-148a-5p	0.75974706
ENST00000265729	ENSG00000075142 (SRI)	SRI	hsa-miR-148a-5p	0.759743803
ENST00000260630	ENSG00000138061 (CYP1B1)	CYP1B1	hsa-miR-148a-5p	0.759730965
ENST00000357749	ENSG00000188419 (CHM)	CHM	hsa-miR-148a-5p	0.759644445
ENST00000369558	ENSG00000163349 (HIPK1)	HIPK1	hsa-miR-148a-5p	0.759620794
ENST00000390658	ENSG00000176396 (EID2)	EID2	hsa-miR-148a-5p	0.759587903
ENST00000354410	ENSG00000068305 (MEF2A)	MEF2A	hsa-miR-148a-5p	0.759223421
ENST00000289371	ENSG00000158417 (EIF5B)	EIF5B	hsa-miR-148a-5p	0.75896972
ENST00000336219	ENSG00000170779 (CDCA4)	CDCA4	hsa-miR-148a-5p	0.758955526
ENST00000265271	ENSG00000091009 (RBM27)	RBM27	hsa-miR-148a-5p	0.758753982
ENST00000382545	ENSG00000111262 (KCNA1)	KCNA1	hsa-miR-148a-5p	0.758704266
ENST00000389868	ENSG00000100503 (NIN)	NIN	hsa-miR-148a-5p	0.758621602
ENST00000282003	ENSG00000152193 (RNF219)	RNF219	hsa-miR-148a-5p	0.758332857
ENST00000541124	ENSG00000131467 (PSME3)	PSME3	hsa-miR-148a-5p	0.75831798
ENST00000297323	ENSG00000164742 (ADCY1)	ADCY1	hsa-miR-148a-5p	0.758315038
ENST00000374242	ENSG00000148153 (INIP)	INIP	hsa-miR-148a-5p	0.758234519
ENST00000380846	ENSG00000205595 (AREGB)	AREGB	hsa-miR-148a-5p	0.758216497
ENST00000261441	ENSG00000081019 (RSBN1)	RSBN1	hsa-miR-148a-5p	0.75818776
ENST00000325110	ENSG00000112972 (HMGCS1)	HMGCS1	hsa-miR-148a-5p	0.758182052
ENST00000399275	ENSG00000120693 (SMAD9)	SMAD9	hsa-miR-148a-5p	0.758147194
ENST00000243056	ENSG00000123364 (HOXC13)	HOXC13	hsa-miR-148a-5p	0.758076391
ENST00000392547	ENSG00000115935 (WIPF1)	WIPF1	hsa-miR-148a-5p	0.758015636
ENST00000317025	ENSG00000147548 (WHSC1L1)	WHSC1L1	hsa-miR-148a-5p	0.757996372
ENST00000303635	ENSG00000171735 (CAMTA1)	CAMTA1	hsa-miR-148a-5p	0.757674021
ENST00000389341	ENSG00000028277 (POU2F2)	POU2F2	hsa-miR-148a-5p	0.75764754
ENST00000450801	ENSG00000101974 (ATP11C)	ATP11C	hsa-miR-148a-5p	0.757597754
ENST00000378856	ENSG00000157423 (HYDIN)	HYDIN	hsa-miR-148a-5p	0.757591555
ENST00000368199	ENSG00000027869 (SH2D2A)	SH2D2A	hsa-miR-148a-5p	0.757536439
ENST00000343882	ENSG00000118689 (FOXO3)	FOXO3	hsa-miR-148a-5p	0.757356842
ENST00000282541	ENSG00000152642 (GPD1L)	GPD1L	hsa-miR-148a-5p	0.757328838
ENST00000536441	ENSG00000149212 (SESN3)	SESN3	hsa-miR-148a-5p	0.756957708
ENST00000400788	ENSG00000215712 (TMEM242)	TMEM242	hsa-miR-148a-5p	0.756903107
ENST00000382496	ENSG00000112902 (SEMA5A)	SEMA5A	hsa-miR-148a-5p	0.756629445
ENST00000361138	ENSG00000198887 (SMC5)	SMC5	hsa-miR-148a-5p	0.756434527
ENST00000394800	ENSG00000015479 (MATR3)	MATR3	hsa-miR-148a-5p	0.756266105
ENST00000367660	ENSG00000146386 (ABRACL)	ABRACL	hsa-miR-148a-5p	0.756057035
ENST00000357816	ENSG00000165566 (AMER2)	AMER2	hsa-miR-148a-5p	0.755686979
ENST00000341590	ENSG00000073712 (FERMT2)	FERMT2	hsa-miR-148a-5p	0.75532716
ENST00000373235	ENSG00000116819 (TFAP2E)	TFAP2E	hsa-miR-148a-5p	0.755195525
ENST00000360000	ENSG00000180964 (TCEAL8)	TCEAL8	hsa-miR-148a-5p	0.75502964
ENST00000345097	ENSG00000053254 (FOXN3)	FOXN3	hsa-miR-148a-5p	0.754927535
ENST00000549357	ENSG00000258053 (CTD-2021H9.3)	CTD-2021H9.3	hsa-miR-148a-5p	0.754919779
ENST00000421388	ENSG00000235711 (ANKRD34C)	ANKRD34C	hsa-miR-148a-5p	0.754714786
ENST00000262648	ENSG00000011201 (KAL1)	KAL1	hsa-miR-148a-5p	0.754439323
ENST00000428126	ENSG00000165682 (CLEC1B)	CLEC1B	hsa-miR-148a-5p	0.754311116
ENST00000460231	ENSG00000081154 (PCNP)	PCNP	hsa-miR-148a-5p	0.754260304
ENST00000465804	ENSG00000018408 (WWTR1)	WWTR1	hsa-miR-148a-5p	0.754153583
ENST00000273064	ENSG00000144580 (RQCD1)	RQCD1	hsa-miR-148a-5p	0.754141563
ENST00000264977	ENSG00000073711 (PPP2R3A)	PPP2R3A	hsa-miR-148a-5p	0.754066768
ENST00000264741	ENSG00000144668 (ITGA9)	ITGA9	hsa-miR-148a-5p	0.753985014
ENST00000376712	ENSG00000102595 (UGGT2)	UGGT2	hsa-miR-148a-5p	0.753846928
ENST00000369406	ENSG00000134240 (HMGCS2)	HMGCS2	hsa-miR-148a-5p	0.753749884
ENST00000228567	ENSG00000110975 (SYT10)	SYT10	hsa-miR-148a-5p	0.753657334
ENST00000268035	ENSG00000140443 (IGF1R)	IGF1R	hsa-miR-148a-5p	0.753507099
ENST00000370396	ENSG00000171100 (MTM1)	MTM1	hsa-miR-148a-5p	0.753359585
ENST00000240651	ENSG00000121350 (PYROXD1)	PYROXD1	hsa-miR-148a-5p	0.753335353
ENST00000377047	ENSG00000183098 (GPC6)	GPC6	hsa-miR-148a-5p	0.753295396
ENST00000456504	ENSG00000140563 (MCTP2)	MCTP2	hsa-miR-148a-5p	0.753271386
ENST00000444587	ENSG00000196565 (HBG2)	HBG2	hsa-miR-148a-5p	0.753073432
ENST00000258341	ENSG00000135862 (LAMC1)	LAMC1	hsa-miR-148a-5p	0.752862973
ENST00000380635	ENSG00000205542 (TMSB4X)	TMSB4X	hsa-miR-148a-5p	0.752733916
ENST00000284637	ENSG00000154447 (SH3RF1)	SH3RF1	hsa-miR-148a-5p	0.752727573
ENST00000353364	ENSG00000135655 (USP15)	USP15	hsa-miR-148a-5p	0.752457856
ENST00000359707	ENSG00000138757 (G3BP2)	G3BP2	hsa-miR-148a-5p	0.752137702
ENST00000371824	ENSG00000162374 (ELAVL4)	ELAVL4	hsa-miR-148a-5p	0.752063031
ENST00000380155	ENSG00000169895 (SYAP1)	SYAP1	hsa-miR-148a-5p	0.752024068
ENST00000371208	ENSG00000134709 (HOOK1)	HOOK1	hsa-miR-148a-5p	0.751936683
ENST00000392552	ENSG00000163328 (GPR155)	GPR155	hsa-miR-148a-5p	0.751876137
ENST00000361525	ENSG00000196482 (ESRRG)	ESRRG	hsa-miR-148a-5p	0.751769691
ENST00000366574	ENSG00000198626 (RYR2)	RYR2	hsa-miR-148a-5p	0.751726923
ENST00000371383	ENSG00000112796 (ENPP5)	ENPP5	hsa-miR-148a-5p	0.751720735
ENST00000201031	ENSG00000087510 (TFAP2C)	TFAP2C	hsa-miR-148a-5p	0.751644936
ENST00000260818	ENSG00000138246 (DNAJC13)	DNAJC13	hsa-miR-148a-5p	0.751623341
ENST00000240285	ENSG00000121039 (RDH10)	RDH10	hsa-miR-148a-5p	0.751571372
ENST00000286657	ENSG00000156140 (ADAMTS3)	ADAMTS3	hsa-miR-148a-5p	0.75156343
ENST00000243300	ENSG00000123572 (NRK)	NRK	hsa-miR-148a-5p	0.751459384
ENST00000229595	ENSG00000111875 (ASF1A)	ASF1A	hsa-miR-148a-5p	0.751364891
ENST00000439944	ENSG00000172061 (LRRC15)	LRRC15	hsa-miR-148a-5p	0.75131558
ENST00000439040	ENSG00000133657 (ATP13A3)	ATP13A3	hsa-miR-148a-5p	0.751129164
ENST00000361669	ENSG00000198822 (GRM3)	GRM3	hsa-miR-148a-5p	0.751117468
ENST00000534304	ENSG00000174501 (ANKRD36C)	ANKRD36C	hsa-miR-148a-5p	0.751046086
ENST00000413366	ENSG00000154229 (PRKCA)	PRKCA	hsa-miR-148a-5p	0.750983431
ENST00000400602	ENSG00000132953 (XPO4)	XPO4	hsa-miR-148a-5p	0.75073406
ENST00000367350	ENSG00000118193 (KIF14)	KIF14	hsa-miR-148a-5p	0.750607883
ENST00000263735	ENSG00000119888 (EPCAM)	EPCAM	hsa-miR-148a-5p	0.750516528
ENST00000263253	ENSG00000100393 (EP300)	EP300	hsa-miR-148a-5p	0.75050496
ENST00000370445	ENSG00000143032 (BARHL2)	BARHL2	hsa-miR-148a-5p	0.750495332
ENST00000265381	ENSG00000107282 (APBA1)	APBA1	hsa-miR-148a-5p	0.750359573
ENST00000398417	ENSG00000141646 (SMAD4)	SMAD4	hsa-miR-148a-5p	0.750251353
ENST00000355624	ENSG00000107560 (RAB11FIP2)	RAB11FIP2	hsa-miR-148a-5p	0.750185903
ENST00000338564	ENSG00000134138 (MEIS2)	MEIS2	hsa-miR-148a-5p	0.750135825
ENST00000538629	ENSG00000085365 (SCAMP1)	SCAMP1	hsa-miR-148a-5p	0.749949553
ENST00000247225	ENSG00000126821 (SGPP1)	SGPP1	hsa-miR-148a-5p	0.749902719
ENST00000457346	ENSG00000175356 (SCUBE2)	SCUBE2	hsa-miR-148a-5p	0.749675766
ENST00000372624	ENSG00000172465 (TCEAL1)	TCEAL1	hsa-miR-148a-5p	0.749543376
ENST00000355689	ENSG00000197557 (TTC30A)	TTC30A	hsa-miR-148a-5p	0.748936494
ENST00000427594	ENSG00000176771 (NCKAP5)	NCKAP5	hsa-miR-148a-5p	0.748807933
ENST00000333319	ENSG00000244291 (C7orf13)	C7orf13	hsa-miR-148a-5p	0.74878741
ENST00000389194	ENSG00000198862 (LTN1)	LTN1	hsa-miR-148a-5p	0.748762943
ENST00000287538	ENSG00000156925 (ZIC3)	ZIC3	hsa-miR-148a-5p	0.748607194
ENST00000360771	ENSG00000170180 (GYPA)	GYPA	hsa-miR-148a-5p	0.748599012
ENST00000272647	ENSG00000144233 (AMMECR1L)	AMMECR1L	hsa-miR-148a-5p	0.748506261
ENST00000247178	ENSG00000126775 (ATG14)	ATG14	hsa-miR-148a-5p	0.748496019
ENST00000378711	ENSG00000205086 (C2orf91)	C2orf91	hsa-miR-148a-5p	0.748464282
ENST00000373719	ENSG00000147162 (OGT)	OGT	hsa-miR-148a-5p	0.748428776
ENST00000282397	ENSG00000102755 (FLT1)	FLT1	hsa-miR-148a-5p	0.748347445
ENST00000458537	ENSG00000136603 (SKIL)	SKIL	hsa-miR-148a-5p	0.748163758
ENST00000392583	ENSG00000111335 (OAS2)	OAS2	hsa-miR-148a-5p	0.74810395
ENST00000370978	ENSG00000056277 (ZNF280C)	ZNF280C	hsa-miR-148a-5p	0.748033696
ENST00000316407	ENSG00000176542 (KIAA2018)	KIAA2018	hsa-miR-148a-5p	0.747834354
ENST00000273963	ENSG00000145332 (KLHL8)	KLHL8	hsa-miR-148a-5p	0.747800771
ENST00000336505	ENSG00000173611 (SCAI)	SCAI	hsa-miR-148a-5p	0.747254327
ENST00000330022	ENSG00000181555 (SETD2)	SETD2	hsa-miR-148a-5p	0.7471647
ENST00000053468	ENSG00000048544 (MRPS10)	MRPS10	hsa-miR-148a-5p	0.747112905
ENST00000400137	ENSG00000088832 (FKBP1A)	FKBP1A	hsa-miR-148a-5p	0.747036514
ENST00000358951	ENSG00000118873 (RAB3GAP2)	RAB3GAP2	hsa-miR-148a-5p	0.74693671
ENST00000329255	ENSG00000052850 (ALX4)	ALX4	hsa-miR-148a-5p	0.746782675
ENST00000445478	ENSG00000070495 (JMJD6)	JMJD6	hsa-miR-148a-5p	0.746724927
ENST00000389698	ENSG00000174373 (RALGAPA1)	RALGAPA1	hsa-miR-148a-5p	0.746700221
ENST00000396987	ENSG00000158669 (AGPAT6)	AGPAT6	hsa-miR-148a-5p	0.746650616
ENST00000508591	ENSG00000163312 (HELQ)	HELQ	hsa-miR-148a-5p	0.746533398
ENST00000531448	ENSG00000165325 (CCDC67)	CCDC67	hsa-miR-148a-5p	0.746350252
ENST00000431532	ENSG00000117174 (ZNHIT6)	ZNHIT6	hsa-miR-148a-5p	0.746219787
ENST00000286031	ENSG00000000460 (C1orf112)	C1orf112	hsa-miR-148a-5p	0.746126651
ENST00000274093	ENSG00000145451 (GLRA3)	GLRA3	hsa-miR-148a-5p	0.746085228
ENST00000318063	ENSG00000155970 (MICU3)	MICU3	hsa-miR-148a-5p	0.745952137
ENST00000419673	ENSG00000088756 (ARHGAP28)	ARHGAP28	hsa-miR-148a-5p	0.745838064
ENST00000370440	ENSG00000122482 (ZNF644)	ZNF644	hsa-miR-148a-5p	0.745827802
ENST00000457361	ENSG00000030419 (IKZF2)	IKZF2	hsa-miR-148a-5p	0.745581874
ENST00000209884	ENSG00000076321 (KLHL20)	KLHL20	hsa-miR-148a-5p	0.745574727
ENST00000424326	ENSG00000136546 (SCN7A)	SCN7A	hsa-miR-148a-5p	0.745480561
ENST00000319550	ENSG00000178425 (NT5DC1)	NT5DC1	hsa-miR-148a-5p	0.745245332
ENST00000361524	ENSG00000198795 (ZNF521)	ZNF521	hsa-miR-148a-5p	0.745231545
ENST00000508457	ENSG00000205208 (C4orf46)	C4orf46	hsa-miR-148a-5p	0.74519555
ENST00000280612	ENSG00000151012 (SLC7A11)	SLC7A11	hsa-miR-148a-5p	0.745098732
ENST00000601440	ENSG00000188171 (ZNF626)	ZNF626	hsa-miR-148a-5p	0.744449571
ENST00000545170	ENSG00000066427 (ATXN3)	ATXN3	hsa-miR-148a-5p	0.744312305
ENST00000264018	ENSG00000110367 (DDX6)	DDX6	hsa-miR-148a-5p	0.744227976
ENST00000299084	ENSG00000166068 (SPRED1)	SPRED1	hsa-miR-148a-5p	0.744169404
ENST00000471363	ENSG00000157445 (CACNA2D3)	CACNA2D3	hsa-miR-148a-5p	0.744112734
ENST00000304363	ENSG00000110066 (SUV420H1)	SUV420H1	hsa-miR-148a-5p	0.743648069
ENST00000442138	ENSG00000164244 (PRRC1)	PRRC1	hsa-miR-148a-5p	0.743642957
ENST00000437140	ENSG00000136243 (NUPL2)	NUPL2	hsa-miR-148a-5p	0.743600988
ENST00000557943	ENSG00000140374 (ETFA)	ETFA	hsa-miR-148a-5p	0.743567387
ENST00000357758	ENSG00000100523 (DDHD1)	DDHD1	hsa-miR-148a-5p	0.743531882
ENST00000374806	ENSG00000188386 (PPP3R2)	PPP3R2	hsa-miR-148a-5p	0.743515723
ENST00000368886	ENSG00000095574 (IKZF5)	IKZF5	hsa-miR-148a-5p	0.74346627
ENST00000424280	ENSG00000113838 (TBCCD1)	TBCCD1	hsa-miR-148a-5p	0.743016702
ENST00000380821	ENSG00000164975 (SNAPC3)	SNAPC3	hsa-miR-148a-5p	0.742952253
ENST00000540528	ENSG00000072274 (TFRC)	TFRC	hsa-miR-148a-5p	0.742881612
ENST00000376185	ENSG00000254870 (ATP6V1G2-DDX39B)	ATP6V1G2-DDX39B	hsa-miR-148a-5p	0.742589093
ENST00000295822	ENSG00000163577 (EIF5A2)	EIF5A2	hsa-miR-148a-5p	0.742335798
ENST00000450689	ENSG00000164659 (KIAA1324L)	KIAA1324L	hsa-miR-148a-5p	0.742105987
ENST00000374379	ENSG00000169504 (CLIC4)	CLIC4	hsa-miR-148a-5p	0.741996162
ENST00000333991	ENSG00000120868 (APAF1)	APAF1	hsa-miR-148a-5p	0.741972556
ENST00000366624	ENSG00000143674 (MLK4)	MLK4	hsa-miR-148a-5p	0.741735832
ENST00000502732	ENSG00000143322 (ABL2)	ABL2	hsa-miR-148a-5p	0.741725007
ENST00000280481	ENSG00000150893 (FREM2)	FREM2	hsa-miR-148a-5p	0.74170502
ENST00000356860	ENSG00000153956 (CACNA2D1)	CACNA2D1	hsa-miR-148a-5p	0.74127455
ENST00000320017	ENSG00000114650 (SCAP)	SCAP	hsa-miR-148a-5p	0.74116367
ENST00000409652	ENSG00000221963 (APOL6)	APOL6	hsa-miR-148a-5p	0.741152797
ENST00000370659	ENSG00000198225 (FKBP1C)	FKBP1C	hsa-miR-148a-5p	0.741008529
ENST00000376872	ENSG00000119121 (TRPM6)	TRPM6	hsa-miR-148a-5p	0.740866029
ENST00000495106	ENSG00000174842 (GLMN)	GLMN	hsa-miR-148a-5p	0.74081253
ENST00000284486	ENSG00000154319 (FAM167A)	FAM167A	hsa-miR-148a-5p	0.740735607
ENST00000374864	ENSG00000078747 (ITCH)	ITCH	hsa-miR-148a-5p	0.740731729
ENST00000366862	ENSG00000143756 (FBXO28)	FBXO28	hsa-miR-148a-5p	0.740663877
ENST00000488050	ENSG00000165283 (STOML2)	STOML2	hsa-miR-148a-5p	0.740158756
ENST00000545556	ENSG00000051825 (MPHOSPH9)	MPHOSPH9	hsa-miR-148a-5p	0.740083947
ENST00000581166	ENSG00000213246 (SUPT4H1)	SUPT4H1	hsa-miR-148a-5p	0.740082216
ENST00000435320	ENSG00000115896 (PLCL1)	PLCL1	hsa-miR-148a-5p	0.739901909
ENST00000379077	ENSG00000184937 (WT1)	WT1	hsa-miR-148a-5p	0.739673106
ENST00000373313	ENSG00000204103 (MAFB)	MAFB	hsa-miR-148a-5p	0.73963177
ENST00000529167	ENSG00000183644 (C11orf88)	C11orf88	hsa-miR-148a-5p	0.739516301
ENST00000264903	ENSG00000138767 (CNOT6L)	CNOT6L	hsa-miR-148a-5p	0.739258734
ENST00000266712	ENSG00000139324 (TMTC3)	TMTC3	hsa-miR-148a-5p	0.739245624
ENST00000366487	ENSG00000196242 (OR2C3)	OR2C3	hsa-miR-148a-5p	0.739205577
ENST00000329970	ENSG00000155115 (GTF3C6)	GTF3C6	hsa-miR-148a-5p	0.739091845
ENST00000365779	ENSG00000012174 (MBTPS2)	MBTPS2	hsa-miR-148a-5p	0.739031802
ENST00000322507	ENSG00000111799 (COL12A1)	COL12A1	hsa-miR-148a-5p	0.739012275
ENST00000433529	ENSG00000116001 (TIA1)	TIA1	hsa-miR-148a-5p	0.738941314
ENST00000450714	ENSG00000154438 (ASZ1)	ASZ1	hsa-miR-148a-5p	0.738926052
ENST00000381440	ENSG00000205730 (ITPRIPL2)	ITPRIPL2	hsa-miR-148a-5p	0.738847582
ENST00000394329	ENSG00000196159 (FAT4)	FAT4	hsa-miR-148a-5p	0.73869581
ENST00000282441	ENSG00000137693 (YAP1)	YAP1	hsa-miR-148a-5p	0.738540807
ENST00000429591	ENSG00000178665 (ZNF713)	ZNF713	hsa-miR-148a-5p	0.738214918
ENST00000546136	ENSG00000134532 (SOX5)	SOX5	hsa-miR-148a-5p	0.738028136
ENST00000371172	ENSG00000197430 (OPALIN)	OPALIN	hsa-miR-148a-5p	0.738016572
ENST00000598979	ENSG00000126453 (BCL2L12)	BCL2L12	hsa-miR-148a-5p	0.737829778
ENST00000421307	ENSG00000093167 (LRRFIP2)	LRRFIP2	hsa-miR-148a-5p	0.737652008
ENST00000548221	ENSG00000123338 (NCKAP1L)	NCKAP1L	hsa-miR-148a-5p	0.737548533
ENST00000496804	ENSG00000127603 (MACF1)	MACF1	hsa-miR-148a-5p	0.737380722
ENST00000367136	ENSG00000162877 (PM20D1)	PM20D1	hsa-miR-148a-5p	0.737355178
ENST00000531487	ENSG00000255561 (FDXACB1)	FDXACB1	hsa-miR-148a-5p	0.737196652
ENST00000358691	ENSG00000198265 (HELZ)	HELZ	hsa-miR-148a-5p	0.73703695
ENST00000424861	ENSG00000104375 (STK3)	STK3	hsa-miR-148a-5p	0.736928701
ENST00000313455	ENSG00000178217 (SH2D4B)	SH2D4B	hsa-miR-148a-5p	0.736811565
ENST00000547861	ENSG00000139537 (CCDC65)	CCDC65	hsa-miR-148a-5p	0.736668318
ENST00000341656	ENSG00000205238 (SPDYE2)	SPDYE2	hsa-miR-148a-5p	0.736653937
ENST00000462322	ENSG00000240204 (SMKR1)	SMKR1	hsa-miR-148a-5p	0.736415885
ENST00000520099	ENSG00000214954 (LRRC69)	LRRC69	hsa-miR-148a-5p	0.736323353
ENST00000375856	ENSG00000185950 (IRS2)	IRS2	hsa-miR-148a-5p	0.736311098
ENST00000371322	ENSG00000158290 (CUL4B)	CUL4B	hsa-miR-148a-5p	0.73622844
ENST00000372687	ENSG00000156671 (SAMD8)	SAMD8	hsa-miR-148a-5p	0.736134491
ENST00000280098	ENSG00000144228 (SPOPL)	SPOPL	hsa-miR-148a-5p	0.736113012
ENST00000373566	ENSG00000204120 (GIGYF2)	GIGYF2	hsa-miR-148a-5p	0.735943777
ENST00000443173	ENSG00000226887 (ERVMER34-1)	ERVMER34-1	hsa-miR-148a-5p	0.735892111
ENST00000504477	ENSG00000145703 (IQGAP2)	IQGAP2	hsa-miR-148a-5p	0.735812451
ENST00000440289	ENSG00000149177 (PTPRJ)	PTPRJ	hsa-miR-148a-5p	0.735811288
ENST00000484389	ENSG00000083544 (TDRD3)	TDRD3	hsa-miR-148a-5p	0.73575668
ENST00000367771	ENSG00000000457 (SCYL3)	SCYL3	hsa-miR-148a-5p	0.735751638
ENST00000380206	ENSG00000188379 (IFNA2)	IFNA2	hsa-miR-148a-5p	0.735565855
ENST00000432648	ENSG00000174574 (AKIRIN1)	AKIRIN1	hsa-miR-148a-5p	0.735311365
ENST00000314471	ENSG00000179134 (SAMD4B)	SAMD4B	hsa-miR-148a-5p	0.735267969
ENST00000440623	ENSG00000138434 (SSFA2)	SSFA2	hsa-miR-148a-5p	0.73446647
ENST00000458141	ENSG00000137573 (SULF1)	SULF1	hsa-miR-148a-5p	0.734430935
ENST00000265734	ENSG00000105810 (CDK6)	CDK6	hsa-miR-148a-5p	0.734344911
ENST00000425515	ENSG00000093134 (VNN3)	VNN3	hsa-miR-148a-5p	0.734281221
ENST00000532224	ENSG00000134242 (PTPN22)	PTPN22	hsa-miR-148a-5p	0.734263352
ENST00000433355	ENSG00000146414 (SHPRH)	SHPRH	hsa-miR-148a-5p	0.734123371
ENST00000398868	ENSG00000184743 (ATL3)	ATL3	hsa-miR-148a-5p	0.734108628
ENST00000344034	ENSG00000115241 (PPM1G)	PPM1G	hsa-miR-148a-5p	0.734041013
ENST00000343796	ENSG00000113580 (NR3C1)	NR3C1	hsa-miR-148a-5p	0.733714764
ENST00000568990	ENSG00000102904 (TSNAXIP1)	TSNAXIP1	hsa-miR-148a-5p	0.733598198
ENST00000332397	ENSG00000214300 (SPDYE3)	SPDYE3	hsa-miR-148a-5p	0.733533025
ENST00000415760	ENSG00000162620 (LRRIQ3)	LRRIQ3	hsa-miR-148a-5p	0.733363714
ENST00000326793	ENSG00000114331 (ACAP2)	ACAP2	hsa-miR-148a-5p	0.733310336
ENST00000379607	ENSG00000173674 (EIF1AX)	EIF1AX	hsa-miR-148a-5p	0.733028023
ENST00000377564	ENSG00000154529 (CNTNAP3B)	CNTNAP3B	hsa-miR-148a-5p	0.732966423
ENST00000396578	ENSG00000169031 (COL4A3)	COL4A3	hsa-miR-148a-5p	0.732755306
ENST00000521074	ENSG00000235931 (C10orf40)	C10orf40	hsa-miR-148a-5p	0.732693537
ENST00000373521	ENSG00000184388 (PABPC1L2B)	PABPC1L2B	hsa-miR-148a-5p	0.73242697
ENST00000251081	ENSG00000134755 (DSC2)	DSC2	hsa-miR-148a-5p	0.732279789
ENST00000379483	ENSG00000120696 (KBTBD7)	KBTBD7	hsa-miR-148a-5p	0.732170427
ENST00000290541	ENSG00000159377 (PSMB4)	PSMB4	hsa-miR-148a-5p	0.732100773
ENST00000560600	ENSG00000100908 (EMC9)	EMC9	hsa-miR-148a-5p	0.732032456
ENST00000279873	ENSG00000150347 (ARID5B)	ARID5B	hsa-miR-148a-5p	0.731868905
ENST00000440172	ENSG00000122778 (KIAA1549)	KIAA1549	hsa-miR-148a-5p	0.731773159
ENST00000374257	ENSG00000119314 (PTBP3)	PTBP3	hsa-miR-148a-5p	0.731505006
ENST00000427715	ENSG00000164756 (SLC30A8)	SLC30A8	hsa-miR-148a-5p	0.731343015
ENST00000372977	ENSG00000137413 (TAF8)	TAF8	hsa-miR-148a-5p	0.731089083
ENST00000526995	ENSG00000175104 (TRAF6)	TRAF6	hsa-miR-148a-5p	0.730985876
ENST00000371227	ENSG00000095637 (SORBS1)	SORBS1	hsa-miR-148a-5p	0.730935432
ENST00000532462	ENSG00000100504 (PYGL)	PYGL	hsa-miR-148a-5p	0.730810739
ENST00000367630	ENSG00000009844 (VTA1)	VTA1	hsa-miR-148a-5p	0.730796151
ENST00000359332	ENSG00000197776 (KLHDC1)	KLHDC1	hsa-miR-148a-5p	0.730766536
ENST00000523094	ENSG00000113282 (CLINT1)	CLINT1	hsa-miR-148a-5p	0.730677489
ENST00000258538	ENSG00000136052 (SLC41A2)	SLC41A2	hsa-miR-148a-5p	0.730559971
ENST00000340648	ENSG00000160208 (RRP1B)	RRP1B	hsa-miR-148a-5p	0.730557396
ENST00000322349	ENSG00000102189 (EEA1)	EEA1	hsa-miR-148a-5p	0.730373946
ENST00000379028	ENSG00000091129 (NRCAM)	NRCAM	hsa-miR-148a-5p	0.73035084
ENST00000580104	ENSG00000153339 (TRAPPC8)	TRAPPC8	hsa-miR-148a-5p	0.729925295
ENST00000424141	ENSG00000135423 (GLS2)	GLS2	hsa-miR-148a-5p	0.729857228
ENST00000376052	ENSG00000134900 (TPP2)	TPP2	hsa-miR-148a-5p	0.729813808
ENST00000315796	ENSG00000172878 (METAP1D)	METAP1D	hsa-miR-148a-5p	0.729668484
ENST00000395748	ENSG00000109321 (AREG)	AREG	hsa-miR-148a-5p	0.729512843
ENST00000397564	ENSG00000111707 (SUDS3)	SUDS3	hsa-miR-148a-5p	0.729266069
ENST00000417403	ENSG00000179869 (ABCA13)	ABCA13	hsa-miR-148a-5p	0.729249744
ENST00000526680	ENSG00000154359 (LONRF1)	LONRF1	hsa-miR-148a-5p	0.72923833
ENST00000373670	ENSG00000056586 (RC3H2)	RC3H2	hsa-miR-148a-5p	0.729173173
ENST00000480174	ENSG00000137941 (TTLL7)	TTLL7	hsa-miR-148a-5p	0.729030204
ENST00000366922	ENSG00000067704 (IARS2)	IARS2	hsa-miR-148a-5p	0.729024279
ENST00000475243	ENSG00000124164 (VAPB)	VAPB	hsa-miR-148a-5p	0.728849205
ENST00000361902	ENSG00000198704 (GPX6)	GPX6	hsa-miR-148a-5p	0.728768374
ENST00000320848	ENSG00000178988 (MRFAP1L1)	MRFAP1L1	hsa-miR-148a-5p	0.728533981
ENST00000296498	ENSG00000164099 (PRSS12)	PRSS12	hsa-miR-148a-5p	0.728478358
ENST00000283195	ENSG00000153201 (RANBP2)	RANBP2	hsa-miR-148a-5p	0.728283359
ENST00000361641	ENSG00000198860 (TSEN15)	TSEN15	hsa-miR-148a-5p	0.727913117
ENST00000448331	ENSG00000266302 (RP11-219A15.1)	RP11-219A15.1	hsa-miR-148a-5p	0.727793708
ENST00000416428	ENSG00000204790 (CBWD6)	CBWD6	hsa-miR-148a-5p	0.727686343
ENST00000357250	ENSG00000112280 (COL9A1)	COL9A1	hsa-miR-148a-5p	0.727355873
ENST00000306503	ENSG00000171150 (SOCS5)	SOCS5	hsa-miR-148a-5p	0.727336357
ENST00000333990	ENSG00000125630 (POLR1B)	POLR1B	hsa-miR-148a-5p	0.727214112
ENST00000382708	ENSG00000092010 (PSME1)	PSME1	hsa-miR-148a-5p	0.727150834
ENST00000360128	ENSG00000198042 (MAK16)	MAK16	hsa-miR-148a-5p	0.727030659
ENST00000300303	ENSG00000167011 (NAT16)	NAT16	hsa-miR-148a-5p	0.726983619
ENST00000370630	ENSG00000117151 (CTBS)	CTBS	hsa-miR-148a-5p	0.726960091
ENST00000586400	ENSG00000204278 (TMEM235)	TMEM235	hsa-miR-148a-5p	0.726888112
ENST00000391403	ENSG00000212710 (CTAGE1)	CTAGE1	hsa-miR-148a-5p	0.726528099
ENST00000555188	ENSG00000169291 (SHE)	SHE	hsa-miR-148a-5p	0.726430277
ENST00000332674	ENSG00000119950 (MXI1)	MXI1	hsa-miR-148a-5p	0.72642824
ENST00000587003	ENSG00000068097 (HEATR6)	HEATR6	hsa-miR-148a-5p	0.726403709
ENST00000421467	ENSG00000136231 (IGF2BP3)	IGF2BP3	hsa-miR-148a-5p	0.726257704
ENST00000412731	ENSG00000128708 (HAT1)	HAT1	hsa-miR-148a-5p	0.726255146
ENST00000448044	ENSG00000073849 (ST6GAL1)	ST6GAL1	hsa-miR-148a-5p	0.726027701
ENST00000296674	ENSG00000186468 (RPS23)	RPS23	hsa-miR-148a-5p	0.725859706
ENST00000359362	ENSG00000186197 (EDARADD)	EDARADD	hsa-miR-148a-5p	0.725759204
ENST00000334652	ENSG00000122483 (CCDC18)	CCDC18	hsa-miR-148a-5p	0.72574413
ENST00000591822	ENSG00000033011 (ALG1)	ALG1	hsa-miR-148a-5p	0.725673121
ENST00000558158	ENSG00000166069 (TMCO5A)	TMCO5A	hsa-miR-148a-5p	0.72562231
ENST00000345063	ENSG00000188001 (TPRG1)	TPRG1	hsa-miR-148a-5p	0.725590308
ENST00000404580	ENSG00000204941 (PSG5)	PSG5	hsa-miR-148a-5p	0.72551912
ENST00000312675	ENSG00000145012 (LPP)	LPP	hsa-miR-148a-5p	0.725401185
ENST00000308275	ENSG00000167196 (FBXO22)	FBXO22	hsa-miR-148a-5p	0.725272277
ENST00000280699	ENSG00000151092 (NGLY1)	NGLY1	hsa-miR-148a-5p	0.725267056
ENST00000298251	ENSG00000165478 (HEPACAM)	HEPACAM	hsa-miR-148a-5p	0.724911382
ENST00000381118	ENSG00000049167 (ERCC8)	ERCC8	hsa-miR-148a-5p	0.724897254
ENST00000370548	ENSG00000267561 (RP5-1052I5.2)	RP5-1052I5.2	hsa-miR-148a-5p	0.724794956
ENST00000432921	ENSG00000100852 (ARHGAP5)	ARHGAP5	hsa-miR-148a-5p	0.724721164
ENST00000264864	ENSG00000038210 (PI4K2B)	PI4K2B	hsa-miR-148a-5p	0.724545166
ENST00000357421	ENSG00000176274 (SLC25A53)	SLC25A53	hsa-miR-148a-5p	0.7244292
ENST00000262291	ENSG00000062716 (VMP1)	VMP1	hsa-miR-148a-5p	0.72438705
ENST00000305031	ENSG00000198108 (CHSY3)	CHSY3	hsa-miR-148a-5p	0.724307321
ENST00000423275	ENSG00000132155 (RAF1)	RAF1	hsa-miR-148a-5p	0.724068788
ENST00000369686	ENSG00000134245 (WNT2B)	WNT2B	hsa-miR-148a-5p	0.723968782
ENST00000338513	ENSG00000189280 (GJB5)	GJB5	hsa-miR-148a-5p	0.723957076
ENST00000361786	ENSG00000198894 (CIPC)	CIPC	hsa-miR-148a-5p	0.723907044
ENST00000322773	ENSG00000082293 (COL19A1)	COL19A1	hsa-miR-148a-5p	0.723881398
ENST00000416496	ENSG00000165891 (E2F7)	E2F7	hsa-miR-148a-5p	0.723591229
ENST00000220676	ENSG00000104237 (RP1)	RP1	hsa-miR-148a-5p	0.723328988
ENST00000354300	ENSG00000196850 (PPTC7)	PPTC7	hsa-miR-148a-5p	0.723245596
ENST00000307897	ENSG00000174442 (ZWILCH)	ZWILCH	hsa-miR-148a-5p	0.723166997
ENST00000396037	ENSG00000111728 (ST8SIA1)	ST8SIA1	hsa-miR-148a-5p	0.723134435
ENST00000514226	ENSG00000258659 (TRIM34)	TRIM34	hsa-miR-148a-5p	0.723070627
ENST00000528670	ENSG00000187240 (DYNC2H1)	DYNC2H1	hsa-miR-148a-5p	0.722842442
ENST00000327419	ENSG00000185742 (C11orf87)	C11orf87	hsa-miR-148a-5p	0.722817426
ENST00000317643	ENSG00000168995 (SIGLEC7)	SIGLEC7	hsa-miR-148a-5p	0.722479538
ENST00000512385	ENSG00000064692 (SNCAIP)	SNCAIP	hsa-miR-148a-5p	0.722444387
ENST00000022615	ENSG00000078668 (VDAC3)	VDAC3	hsa-miR-148a-5p	0.722430742
ENST00000354852	ENSG00000258588 (TRIM6-TRIM34)	TRIM6-TRIM34	hsa-miR-148a-5p	0.722406316
ENST00000366553	ENSG00000203668 (CHML)	CHML	hsa-miR-148a-5p	0.722399913
ENST00000490994	ENSG00000138115 (CYP2C8)	CYP2C8	hsa-miR-148a-5p	0.722196125
ENST00000503329	ENSG00000172901 (AQPEP)	AQPEP	hsa-miR-148a-5p	0.722139236
ENST00000222644	ENSG00000105926 (MPP6)	MPP6	hsa-miR-148a-5p	0.722115509
ENST00000472059	ENSG00000072210 (ALDH3A2)	ALDH3A2	hsa-miR-148a-5p	0.722095228
ENST00000529084	ENSG00000140798 (ABCC12)	ABCC12	hsa-miR-148a-5p	0.722094065
ENST00000288828	ENSG00000157954 (WIPI2)	WIPI2	hsa-miR-148a-5p	0.721946969
ENST00000361127	ENSG00000198799 (LRIG2)	LRIG2	hsa-miR-148a-5p	0.721928766
ENST00000594665	ENSG00000104880 (ARHGEF18)	ARHGEF18	hsa-miR-148a-5p	0.721897118
ENST00000372007	ENSG00000077264 (PAK3)	PAK3	hsa-miR-148a-5p	0.721822401
ENST00000409592	ENSG00000135905 (DOCK10)	DOCK10	hsa-miR-148a-5p	0.721810484
ENST00000374793	ENSG00000136824 (SMC2)	SMC2	hsa-miR-148a-5p	0.721801387
ENST00000447310	ENSG00000251369 (ZNF550)	ZNF550	hsa-miR-148a-5p	0.721699563
ENST00000546910	ENSG00000258227 (CLEC5A)	CLEC5A	hsa-miR-148a-5p	0.721604031
ENST00000265909	ENSG00000120451 (SNX19)	SNX19	hsa-miR-148a-5p	0.721510459
ENST00000264664	ENSG00000070193 (FGF10)	FGF10	hsa-miR-148a-5p	0.721163449
ENST00000392687	ENSG00000172292 (CERS6)	CERS6	hsa-miR-148a-5p	0.720902578
ENST00000311417	ENSG00000172667 (ZMAT3)	ZMAT3	hsa-miR-148a-5p	0.720871456
ENST00000306107	ENSG00000170017 (ALCAM)	ALCAM	hsa-miR-148a-5p	0.720836873
ENST00000358075	ENSG00000102158 (MAGT1)	MAGT1	hsa-miR-148a-5p	0.720750196
ENST00000338883	ENSG00000180815 (MAP3K15)	MAP3K15	hsa-miR-148a-5p	0.72042445
ENST00000274255	ENSG00000145604 (SKP2)	SKP2	hsa-miR-148a-5p	0.720384725
ENST00000369697	ENSG00000171385 (KCND3)	KCND3	hsa-miR-148a-5p	0.720269179
ENST00000362066	ENSG00000177138 (FAM9B)	FAM9B	hsa-miR-148a-5p	0.7202596
ENST00000534277	ENSG00000197302 (ZNF720)	ZNF720	hsa-miR-148a-5p	0.720172983
ENST00000538489	ENSG00000152332 (UHMK1)	UHMK1	hsa-miR-148a-5p	0.720125881
ENST00000560955	ENSG00000092439 (TRPM7)	TRPM7	hsa-miR-148a-5p	0.719855939
ENST00000417761	ENSG00000262560 (RP11-296A16.1)	RP11-296A16.1	hsa-miR-148a-5p	0.719773783
ENST00000357065	ENSG00000169813 (HNRNPF)	HNRNPF	hsa-miR-148a-5p	0.719687317
ENST00000361905	ENSG00000187079 (TEAD1)	TEAD1	hsa-miR-148a-5p	0.71966383
ENST00000223122	ENSG00000106392 (C1GALT1)	C1GALT1	hsa-miR-148a-5p	0.719542268
ENST00000357559	ENSG00000114416 (FXR1)	FXR1	hsa-miR-148a-5p	0.719534853
ENST00000343533	ENSG00000165240 (ATP7A)	ATP7A	hsa-miR-148a-5p	0.719152976
ENST00000393249	ENSG00000091039 (OSBPL8)	OSBPL8	hsa-miR-148a-5p	0.719098754
ENST00000506449	ENSG00000138741 (TRPC3)	TRPC3	hsa-miR-148a-5p	0.719023933
ENST00000361654	ENSG00000130779 (CLIP1)	CLIP1	hsa-miR-148a-5p	0.718811939
ENST00000377252	ENSG00000120594 (PLXDC2)	PLXDC2	hsa-miR-148a-5p	0.718807717
ENST00000495242	ENSG00000047648 (ARHGAP6)	ARHGAP6	hsa-miR-148a-5p	0.718361919
ENST00000451980	ENSG00000229086 (C21orf54)	C21orf54	hsa-miR-148a-5p	0.718261418
ENST00000400301	ENSG00000090686 (USP48)	USP48	hsa-miR-148a-5p	0.718086623
ENST00000419068	ENSG00000118939 (UCHL3)	UCHL3	hsa-miR-148a-5p	0.718071898
ENST00000264157	ENSG00000082258 (CCNT2)	CCNT2	hsa-miR-148a-5p	0.718012385
ENST00000547575	ENSG00000173588 (CCDC41)	CCDC41	hsa-miR-148a-5p	0.717887347
ENST00000398475	ENSG00000086730 (LAT2)	LAT2	hsa-miR-148a-5p	0.71776611
ENST00000555640	ENSG00000165792 (METTL17)	METTL17	hsa-miR-148a-5p	0.7177634
ENST00000356713	ENSG00000119946 (CNNM1)	CNNM1	hsa-miR-148a-5p	0.717674818
ENST00000491415	ENSG00000117597 (DIEXF)	DIEXF	hsa-miR-148a-5p	0.717516537
ENST00000320270	ENSG00000179041 (RRS1)	RRS1	hsa-miR-148a-5p	0.717508386
ENST00000509756	ENSG00000163281 (GNPDA2)	GNPDA2	hsa-miR-148a-5p	0.717376029
ENST00000339656	ENSG00000198466 (ZNF587)	ZNF587	hsa-miR-148a-5p	0.717247312
ENST00000389286	ENSG00000166450 (PRTG)	PRTG	hsa-miR-148a-5p	0.717197312
ENST00000594090	ENSG00000105053 (VRK3)	VRK3	hsa-miR-148a-5p	0.71717113
ENST00000337386	ENSG00000138386 (NAB1)	NAB1	hsa-miR-148a-5p	0.717118898
ENST00000471115	ENSG00000162642 (C1orf52)	C1orf52	hsa-miR-148a-5p	0.716931935
ENST00000494857	ENSG00000003989 (SLC7A2)	SLC7A2	hsa-miR-148a-5p	0.716891202
ENST00000374114	ENSG00000244462 (RBM12)	RBM12	hsa-miR-148a-5p	0.716789448
ENST00000279488	ENSG00000139318 (DUSP6)	DUSP6	hsa-miR-148a-5p	0.716506906
ENST00000315571	ENSG00000179241 (LDLRAD3)	LDLRAD3	hsa-miR-148a-5p	0.716494591
ENST00000369981	ENSG00000196586 (MYO6)	MYO6	hsa-miR-148a-5p	0.716476451
ENST00000442682	ENSG00000214128 (TMEM213)	TMEM213	hsa-miR-148a-5p	0.716401606
ENST00000231524	ENSG00000113595 (TRIM23)	TRIM23	hsa-miR-148a-5p	0.716348311
ENST00000537760	ENSG00000133818 (RRAS2)	RRAS2	hsa-miR-148a-5p	0.716297456
ENST00000367728	ENSG00000135845 (PIGC)	PIGC	hsa-miR-148a-5p	0.716234488
ENST00000318588	ENSG00000147044 (CASK)	CASK	hsa-miR-148a-5p	0.716076832
ENST00000264663	ENSG00000112992 (NNT)	NNT	hsa-miR-148a-5p	0.715781656
ENST00000397712	ENSG00000186522 (SEPT10)	SEPT10	hsa-miR-148a-5p	0.715778404
ENST00000543953	ENSG00000102078 (SLC25A14)	SLC25A14	hsa-miR-148a-5p	0.715700671
ENST00000325404	ENSG00000181449 (SOX2)	SOX2	hsa-miR-148a-5p	0.715614714
ENST00000527958	ENSG00000168092 (PAFAH1B2)	PAFAH1B2	hsa-miR-148a-5p	0.715538716
ENST00000313486	ENSG00000174238 (PITPNA)	PITPNA	hsa-miR-148a-5p	0.71552656
ENST00000361686	ENSG00000144057 (ST6GAL2)	ST6GAL2	hsa-miR-148a-5p	0.71538539
ENST00000335648	ENSG00000249087 (C1orf213)	C1orf213	hsa-miR-148a-5p	0.71526867
ENST00000283206	ENSG00000153214 (TMEM87B)	TMEM87B	hsa-miR-148a-5p	0.714999648
ENST00000325074	ENSG00000159216 (RUNX1)	RUNX1	hsa-miR-148a-5p	0.714790663
ENST00000403662	ENSG00000100368 (CSF2RB)	CSF2RB	hsa-miR-148a-5p	0.714742559
ENST00000399438	ENSG00000113597 (TRAPPC13)	TRAPPC13	hsa-miR-148a-5p	0.71469492
ENST00000371627	ENSG00000107854 (TNKS2)	TNKS2	hsa-miR-148a-5p	0.714599396
ENST00000358524	ENSG00000196844 (PATE2)	PATE2	hsa-miR-148a-5p	0.714499842
ENST00000282041	ENSG00000152223 (EPG5)	EPG5	hsa-miR-148a-5p	0.714490642
ENST00000266673	ENSG00000139291 (TMEM19)	TMEM19	hsa-miR-148a-5p	0.714284922
ENST00000427718	ENSG00000135108 (FBXO21)	FBXO21	hsa-miR-148a-5p	0.714282629
ENST00000367619	ENSG00000057252 (SOAT1)	SOAT1	hsa-miR-148a-5p	0.71424435
ENST00000433710	ENSG00000027001 (MIPEP)	MIPEP	hsa-miR-148a-5p	0.714227898
ENST00000607742	ENSG00000122335 (SERAC1)	SERAC1	hsa-miR-148a-5p	0.714061465
ENST00000509093	ENSG00000138663 (COPS4)	COPS4	hsa-miR-148a-5p	0.714027577
ENST00000373242	ENSG00000079332 (SAR1A)	SAR1A	hsa-miR-148a-5p	0.714004401
ENST00000274773	ENSG00000146054 (TRIM7)	TRIM7	hsa-miR-148a-5p	0.713921449
ENST00000269576	ENSG00000186395 (KRT10)	KRT10	hsa-miR-148a-5p	0.713851731
ENST00000318789	ENSG00000114861 (FOXP1)	FOXP1	hsa-miR-148a-5p	0.713848796
ENST00000306442	ENSG00000168938 (PPIC)	PPIC	hsa-miR-148a-5p	0.713797915
ENST00000319359	ENSG00000128886 (ELL3)	ELL3	hsa-miR-148a-5p	0.713787627
ENST00000283646	ENSG00000153574 (RPIA)	RPIA	hsa-miR-148a-5p	0.713723905
ENST00000315330	ENSG00000150048 (CLEC1A)	CLEC1A	hsa-miR-148a-5p	0.713672408
ENST00000424034	ENSG00000093217 (XYLB)	XYLB	hsa-miR-148a-5p	0.713570325
ENST00000346057	ENSG00000127507 (EMR2)	EMR2	hsa-miR-148a-5p	0.713452697
ENST00000358825	ENSG00000170325 (PRDM10)	PRDM10	hsa-miR-148a-5p	0.713305525
ENST00000332142	ENSG00000184611 (KCNH7)	KCNH7	hsa-miR-148a-5p	0.713302566
ENST00000544303	ENSG00000129873 (CDY2B)	CDY2B	hsa-miR-148a-5p	0.71327566
ENST00000274542	ENSG00000145860 (RNF145)	RNF145	hsa-miR-148a-5p	0.713242612
ENST00000337843	ENSG00000133466 (C1QTNF6)	C1QTNF6	hsa-miR-148a-5p	0.713211143
ENST00000446312	ENSG00000204580 (DDR1)	DDR1	hsa-miR-148a-5p	0.71307507
ENST00000307194	ENSG00000213203 (GIMAP1)	GIMAP1	hsa-miR-148a-5p	0.713024092
ENST00000261726	ENSG00000111249 (CUX2)	CUX2	hsa-miR-148a-5p	0.712966162
ENST00000489615	ENSG00000152061 (RABGAP1L)	RABGAP1L	hsa-miR-148a-5p	0.712849375
ENST00000371477	ENSG00000096401 (CDC5L)	CDC5L	hsa-miR-148a-5p	0.712847076
ENST00000426790	ENSG00000182415 (CDY2A)	CDY2A	hsa-miR-148a-5p	0.712663367
ENST00000369331	ENSG00000165806 (CASP7)	CASP7	hsa-miR-148a-5p	0.712636344
ENST00000286800	ENSG00000156273 (BACH1)	BACH1	hsa-miR-148a-5p	0.712202475
ENST00000520693	ENSG00000006837 (CDKL3)	CDKL3	hsa-miR-148a-5p	0.712141902
ENST00000396194	ENSG00000164949 (GEM)	GEM	hsa-miR-148a-5p	0.712058493
ENST00000511261	ENSG00000124279 (FASTKD3)	FASTKD3	hsa-miR-148a-5p	0.711982899
ENST00000541301	ENSG00000140459 (CYP11A1)	CYP11A1	hsa-miR-148a-5p	0.711863093
ENST00000360003	ENSG00000197771 (MCMBP)	MCMBP	hsa-miR-148a-5p	0.711836865
ENST00000377391	ENSG00000215126 (CBWD7)	CBWD7	hsa-miR-148a-5p	0.711806627
ENST00000287878	ENSG00000106617 (PRKAG2)	PRKAG2	hsa-miR-148a-5p	0.711600201
ENST00000518477	ENSG00000132837 (DMGDH)	DMGDH	hsa-miR-148a-5p	0.711522605
ENST00000229708	ENSG00000111981 (ULBP1)	ULBP1	hsa-miR-148a-5p	0.711442034
ENST00000366618	ENSG00000183780 (SLC35F3)	SLC35F3	hsa-miR-148a-5p	0.711400374
ENST00000544253	ENSG00000168876 (ANKRD49)	ANKRD49	hsa-miR-148a-5p	0.71132261
ENST00000322191	ENSG00000152782 (PANK1)	PANK1	hsa-miR-148a-5p	0.711198499
ENST00000451320	ENSG00000164144 (ARFIP1)	ARFIP1	hsa-miR-148a-5p	0.711064124
ENST00000282849	ENSG00000140873 (ADAMTS18)	ADAMTS18	hsa-miR-148a-5p	0.710733393
ENST00000171887	ENSG00000079308 (TNS1)	TNS1	hsa-miR-148a-5p	0.710692312
ENST00000371730	ENSG00000085832 (EPS15)	EPS15	hsa-miR-148a-5p	0.710348839
ENST00000229135	ENSG00000111537 (IFNG)	IFNG	hsa-miR-148a-5p	0.710342582
ENST00000370791	ENSG00000180488 (FAM73A)	FAM73A	hsa-miR-148a-5p	0.710191687
ENST00000456890	ENSG00000230000 (AC006455.1)	AC006455.1	hsa-miR-148a-5p	0.710166633
ENST00000511685	ENSG00000218336 (TENM3)	TENM3	hsa-miR-148a-5p	0.710055679
ENST00000383701	ENSG00000163378 (EOGT)	EOGT	hsa-miR-148a-5p	0.709997057
ENST00000225577	ENSG00000108443 (RPS6KB1)	RPS6KB1	hsa-miR-148a-5p	0.709653009
ENST00000573070	ENSG00000187838 (TMEM256-PLSCR3)	TMEM256-PLSCR3	hsa-miR-148a-5p	0.709576872
ENST00000310850	ENSG00000129480 (DTD2)	DTD2	hsa-miR-148a-5p	0.709523817
ENST00000265440	ENSG00000105967 (TFEC)	TFEC	hsa-miR-148a-5p	0.709402941
ENST00000506824	ENSG00000109466 (KLHL2)	KLHL2	hsa-miR-148a-5p	0.709335359
ENST00000281928	ENSG00000123066 (MED13L)	MED13L	hsa-miR-148a-5p	0.709167105
ENST00000599674	ENSG00000268107 (AC003005.4)	AC003005.4	hsa-miR-148a-5p	0.709006475
ENST00000400822	ENSG00000130396 (MLLT4)	MLLT4	hsa-miR-148a-5p	0.708732436
ENST00000360280	ENSG00000197969 (VPS13A)	VPS13A	hsa-miR-148a-5p	0.708677537
ENST00000455203	ENSG00000171960 (PPIH)	PPIH	hsa-miR-148a-5p	0.708621599
ENST00000358160	ENSG00000178075 (GRAMD1C)	GRAMD1C	hsa-miR-148a-5p	0.708599766
ENST00000409078	ENSG00000074054 (CLASP1)	CLASP1	hsa-miR-148a-5p	0.70855932
ENST00000389622	ENSG00000080200 (CRYBG3)	CRYBG3	hsa-miR-148a-5p	0.708472681
ENST00000296215	ENSG00000163877 (SNIP1)	SNIP1	hsa-miR-148a-5p	0.708408929
ENST00000377931	ENSG00000204919 (PRR20A)	PRR20A	hsa-miR-148a-5p	0.708399932
ENST00000285407	ENSG00000155090 (KLF10)	KLF10	hsa-miR-148a-5p	0.708106717
ENST00000286298	ENSG00000155850 (SLC26A2)	SLC26A2	hsa-miR-148a-5p	0.708085045
ENST00000482713	ENSG00000038219 (BOD1L1)	BOD1L1	hsa-miR-148a-5p	0.707691053
ENST00000382611	ENSG00000170561 (IRX2)	IRX2	hsa-miR-148a-5p	0.707667151
ENST00000328432	ENSG00000184203 (PPP1R2)	PPP1R2	hsa-miR-148a-5p	0.707517716
ENST00000448461	ENSG00000164048 (ZNF589)	ZNF589	hsa-miR-148a-5p	0.707387312
ENST00000370598	ENSG00000135298 (BAI3)	BAI3	hsa-miR-148a-5p	0.707362024
ENST00000521277	ENSG00000183137 (CEP57L1)	CEP57L1	hsa-miR-148a-5p	0.707320487
ENST00000373840	ENSG00000119396 (RAB14)	RAB14	hsa-miR-148a-5p	0.707301349
ENST00000411529	ENSG00000170144 (HNRNPA3)	HNRNPA3	hsa-miR-148a-5p	0.707155648
ENST00000369287	ENSG00000165813 (C10orf118)	C10orf118	hsa-miR-148a-5p	0.706982964
ENST00000251809	ENSG00000104450 (SPAG1)	SPAG1	hsa-miR-148a-5p	0.706858473
ENST00000471841	ENSG00000171109 (MFN1)	MFN1	hsa-miR-148a-5p	0.706836525
ENST00000336126	ENSG00000180628 (PCGF5)	PCGF5	hsa-miR-148a-5p	0.706822677
ENST00000480516	ENSG00000184040 (TMEM236)	TMEM236	hsa-miR-148a-5p	0.706799831
ENST00000554659	ENSG00000100568 (VTI1B)	VTI1B	hsa-miR-148a-5p	0.706776348
ENST00000394335	ENSG00000134602 (MST4)	MST4	hsa-miR-148a-5p	0.706546906
ENST00000234454	ENSG00000116096 (SPR)	SPR	hsa-miR-148a-5p	0.70653729
ENST00000222219	ENSG00000105612 (DNASE2)	DNASE2	hsa-miR-148a-5p	0.706529457
ENST00000393655	ENSG00000008196 (TFAP2B)	TFAP2B	hsa-miR-148a-5p	0.706426879
ENST00000278612	ENSG00000149308 (NPAT)	NPAT	hsa-miR-148a-5p	0.706336131
ENST00000451519	ENSG00000176428 (VPS37D)	VPS37D	hsa-miR-148a-5p	0.706202714
ENST00000456530	ENSG00000174748 (RPL15)	RPL15	hsa-miR-148a-5p	0.706129684
ENST00000402538	ENSG00000152689 (RASGRP3)	RASGRP3	hsa-miR-148a-5p	0.705919164
ENST00000265362	ENSG00000075213 (SEMA3A)	SEMA3A	hsa-miR-148a-5p	0.70589229
ENST00000506882	ENSG00000145241 (CENPC)	CENPC	hsa-miR-148a-5p	0.705842844
ENST00000361475	ENSG00000198959 (TGM2)	TGM2	hsa-miR-148a-5p	0.705772248
ENST00000368850	ENSG00000112394 (SLC16A10)	SLC16A10	hsa-miR-148a-5p	0.705549596
ENST00000323816	ENSG00000007237 (GAS7)	GAS7	hsa-miR-148a-5p	0.705349583
ENST00000373097	ENSG00000102290 (PCDH11X)	PCDH11X	hsa-miR-148a-5p	0.705339613
ENST00000376723	ENSG00000136731 (UGGT1)	UGGT1	hsa-miR-148a-5p	0.705048319
ENST00000332884	ENSG00000155016 (CYP2U1)	CYP2U1	hsa-miR-148a-5p	0.705026397
ENST00000522770	ENSG00000133739 (LRRCC1)	LRRCC1	hsa-miR-148a-5p	0.704954032
ENST00000327671	ENSG00000172728 (FUT10)	FUT10	hsa-miR-148a-5p	0.704935817
ENST00000540297	ENSG00000166598 (HSP90B1)	HSP90B1	hsa-miR-148a-5p	0.704932766
ENST00000518982	ENSG00000104432 (IL7)	IL7	hsa-miR-148a-5p	0.704889196
ENST00000524463	ENSG00000109861 (CTSC)	CTSC	hsa-miR-148a-5p	0.704887094
ENST00000588388	ENSG00000131941 (RHPN2)	RHPN2	hsa-miR-148a-5p	0.704873399
ENST00000418170	ENSG00000100281 (HMGXB4)	HMGXB4	hsa-miR-148a-5p	0.704852713
ENST00000367142	ENSG00000069275 (NUCKS1)	NUCKS1	hsa-miR-148a-5p	0.704846881
ENST00000329524	ENSG00000072736 (NFATC3)	NFATC3	hsa-miR-148a-5p	0.704726438
ENST00000367385	ENSG00000151414 (NEK7)	NEK7	hsa-miR-148a-5p	0.704446309
ENST00000286835	ENSG00000156304 (SCAF4)	SCAF4	hsa-miR-148a-5p	0.70438618
ENST00000305786	ENSG00000172115 (CYCS)	CYCS	hsa-miR-148a-5p	0.704244813
ENST00000327268	ENSG00000108932 (SLC16A6)	SLC16A6	hsa-miR-148a-5p	0.704243143
ENST00000271375	ENSG00000213064 (SFT2D2)	SFT2D2	hsa-miR-148a-5p	0.704172015
ENST00000537989	ENSG00000112182 (BACH2)	BACH2	hsa-miR-148a-5p	0.703958568
ENST00000491718	ENSG00000090905 (TNRC6A)	TNRC6A	hsa-miR-148a-5p	0.703909825
ENST00000405239	ENSG00000188120 (DAZ1)	DAZ1	hsa-miR-148a-5p	0.703865891
ENST00000252108	ENSG00000110344 (UBE4A)	UBE4A	hsa-miR-148a-5p	0.703687358
ENST00000265071	ENSG00000113361 (CDH6)	CDH6	hsa-miR-148a-5p	0.7036855
ENST00000469838	ENSG00000003756 (RBM5)	RBM5	hsa-miR-148a-5p	0.703521589
ENST00000228280	ENSG00000049130 (KITLG)	KITLG	hsa-miR-148a-5p	0.703459575
ENST00000382365	ENSG00000187191 (DAZ3)	DAZ3	hsa-miR-148a-5p	0.703282178
ENST00000261326	ENSG00000075643 (MOCOS)	MOCOS	hsa-miR-148a-5p	0.703178462
ENST00000265069	ENSG00000056097 (ZFR)	ZFR	hsa-miR-148a-5p	0.703149537
ENST00000366943	ENSG00000042781 (USH2A)	USH2A	hsa-miR-148a-5p	0.702824666
ENST00000382449	ENSG00000205944 (DAZ2)	DAZ2	hsa-miR-148a-5p	0.702785188
ENST00000604236	ENSG00000066468 (FGFR2)	FGFR2	hsa-miR-148a-5p	0.702772152
ENST00000265000	ENSG00000109586 (GALNT7)	GALNT7	hsa-miR-148a-5p	0.702421827
ENST00000336735	ENSG00000071537 (SEL1L)	SEL1L	hsa-miR-148a-5p	0.702384763
ENST00000448246	ENSG00000105866 (SP4)	SP4	hsa-miR-148a-5p	0.702308232
ENST00000278193	ENSG00000148943 (LIN7C)	LIN7C	hsa-miR-148a-5p	0.702152313
ENST00000295324	ENSG00000163171 (CDC42EP3)	CDC42EP3	hsa-miR-148a-5p	0.702152026
ENST00000456483	ENSG00000091831 (ESR1)	ESR1	hsa-miR-148a-5p	0.702110855
ENST00000396184	ENSG00000154678 (PDE1C)	PDE1C	hsa-miR-148a-5p	0.702024823
ENST00000375826	ENSG00000116771 (AGMAT)	AGMAT	hsa-miR-148a-5p	0.701836569
ENST00000504771	ENSG00000145779 (TNFAIP8)	TNFAIP8	hsa-miR-148a-5p	0.701811082
ENST00000372377	ENSG00000126091 (ST3GAL3)	ST3GAL3	hsa-miR-148a-5p	0.701687407
ENST00000520164	ENSG00000221818 (EBF2)	EBF2	hsa-miR-148a-5p	0.701548064
ENST00000543469	ENSG00000213186 (TRIM59)	TRIM59	hsa-miR-148a-5p	0.701541774
ENST00000412217	ENSG00000115421 (PAPOLG)	PAPOLG	hsa-miR-148a-5p	0.701531689
ENST00000361236	ENSG00000152558 (TMEM123)	TMEM123	hsa-miR-148a-5p	0.701456156
ENST00000283943	ENSG00000153827 (TRIP12)	TRIP12	hsa-miR-148a-5p	0.701447758
ENST00000337273	ENSG00000083312 (TNPO1)	TNPO1	hsa-miR-148a-5p	0.701433832
ENST00000284000	ENSG00000153879 (CEBPG)	CEBPG	hsa-miR-148a-5p	0.701283393
ENST00000383745	ENSG00000186448 (ZNF197)	ZNF197	hsa-miR-148a-5p	0.701237647
ENST00000513000	ENSG00000109452 (INPP4B)	INPP4B	hsa-miR-148a-5p	0.701200614
ENST00000251157	ENSG00000116641 (DOCK7)	DOCK7	hsa-miR-148a-5p	0.701161378
ENST00000343936	ENSG00000188177 (ZC3H6)	ZC3H6	hsa-miR-148a-5p	0.701131947
ENST00000263593	ENSG00000110013 (SIAE)	SIAE	hsa-miR-148a-5p	0.70104037
ENST00000370994	ENSG00000142864 (SERBP1)	SERBP1	hsa-miR-148a-5p	0.700865268
ENST00000265044	ENSG00000114850 (SSR3)	SSR3	hsa-miR-148a-5p	0.700654731
ENST00000307602	ENSG00000168172 (HOOK3)	HOOK3	hsa-miR-148a-5p	0.700503486
ENST00000441222	ENSG00000109189 (USP46)	USP46	hsa-miR-148a-5p	0.700346644
ENST00000366958	ENSG00000117707 (PROX1)	PROX1	hsa-miR-148a-5p	0.700265834
ENST00000372759	ENSG00000084073 (ZMPSTE24)	ZMPSTE24	hsa-miR-148a-5p	0.700236821

## Sheet: S1_miRDB
Target Rank	miRNA Name	Gene Symbol	Gene Description	Target Score
1	hsa-miR-148a-5p	PHTF2	putative homeodomain transcription factor 2	100
2	hsa-miR-148a-5p	FAM117B	family with sequence similarity 117, member B	99
3	hsa-miR-148a-5p	SPOCK3	sparc/osteonectin, cwcv and kazal-like domains proteoglycan (testican) 3	98
4	hsa-miR-148a-5p	GSR	glutathione reductase	98
5	hsa-miR-148a-5p	CACUL1	CDK2-associated, cullin domain 1	97
6	hsa-miR-148a-5p	SLIT3	slit homolog 3 (Drosophila)	97
7	hsa-miR-148a-5p	CLCC1	chloride channel CLIC-like 1	97
8	hsa-miR-148a-5p	CXorf23	chromosome X open reading frame 23	97
9	hsa-miR-148a-5p	KDM6A	lysine (K)-specific demethylase 6A	97
10	hsa-miR-148a-5p	REEP1	receptor accessory protein 1	97
11	hsa-miR-148a-5p	SOCS5	suppressor of cytokine signaling 5	97
12	hsa-miR-148a-5p	SLC7A2	solute carrier family 7 (cationic amino acid transporter, y+ system), member 2	96
13	hsa-miR-148a-5p	PTGS1	prostaglandin-endoperoxide synthase 1 (prostaglandin G/H synthase and cyclooxygenase)	96
14	hsa-miR-148a-5p	SIX4	SIX homeobox 4	96
15	hsa-miR-148a-5p	COL5A2	collagen, type V, alpha 2	96
16	hsa-miR-148a-5p	FLRT3	fibronectin leucine rich transmembrane protein 3	96
17	hsa-miR-148a-5p	ATG16L1	autophagy related 16-like 1 (S. cerevisiae)	96
18	hsa-miR-148a-5p	UBE2G1	ubiquitin-conjugating enzyme E2G 1	95
19	hsa-miR-148a-5p	THUMPD3	THUMP domain containing 3	94
20	hsa-miR-148a-5p	KIF13A	kinesin family member 13A	94
21	hsa-miR-148a-5p	ZCCHC10	zinc finger, CCHC domain containing 10	94
22	hsa-miR-148a-5p	FBXL3	F-box and leucine-rich repeat protein 3	94
23	hsa-miR-148a-5p	SCN9A	sodium channel, voltage-gated, type IX, alpha subunit	93
24	hsa-miR-148a-5p	CDKL2	cyclin-dependent kinase-like 2 (CDC2-related kinase)	93
25	hsa-miR-148a-5p	TROVE2	TROVE domain family, member 2	93
26	hsa-miR-148a-5p	PAPOLA	poly(A) polymerase alpha	93
27	hsa-miR-148a-5p	SUV420H1	suppressor of variegation 4-20 homolog 1 (Drosophila)	93
28	hsa-miR-148a-5p	RAB8B	RAB8B, member RAS oncogene family	93
29	hsa-miR-148a-5p	TMEM181	transmembrane protein 181	93
30	hsa-miR-148a-5p	RNF111	ring finger protein 111	92
31	hsa-miR-148a-5p	UBE2QL1	ubiquitin-conjugating enzyme E2Q family-like 1	92
32	hsa-miR-148a-5p	RTKN2	rhotekin 2	91
33	hsa-miR-148a-5p	HNRNPH3	heterogeneous nuclear ribonucleoprotein H3 (2H9)	91
34	hsa-miR-148a-5p	NLGN1	neuroligin 1	91
35	hsa-miR-148a-5p	KIF3B	kinesin family member 3B	91
36	hsa-miR-148a-5p	NT5E	5'-nucleotidase, ecto (CD73)	90
37	hsa-miR-148a-5p	LSM14A	LSM14A, SCD6 homolog A (S. cerevisiae)	90
38	hsa-miR-148a-5p	SLC11A2	solute carrier family 11 (proton-coupled divalent metal ion transporter), member 2	90
39	hsa-miR-148a-5p	CELF1	CUGBP, Elav-like family member 1	90
40	hsa-miR-148a-5p	PLXNA2	plexin A2	90
41	hsa-miR-148a-5p	UBR3	ubiquitin protein ligase E3 component n-recognin 3 (putative)	90
42	hsa-miR-148a-5p	MEMO1	mediator of cell motility 1	90
43	hsa-miR-148a-5p	ARHGEF18	Rho/Rac guanine nucleotide exchange factor (GEF) 18	89
44	hsa-miR-148a-5p	CNTN1	contactin 1	88
45	hsa-miR-148a-5p	ABRACL	ABRA C-terminal like	88
46	hsa-miR-148a-5p	YIPF5	Yip1 domain family, member 5	88
47	hsa-miR-148a-5p	PCGF3	polycomb group ring finger 3	88
48	hsa-miR-148a-5p	C4orf29	chromosome 4 open reading frame 29	87
49	hsa-miR-148a-5p	ETF1	eukaryotic translation termination factor 1	87
50	hsa-miR-148a-5p	CPEB3	cytoplasmic polyadenylation element binding protein 3	87
51	hsa-miR-148a-5p	FKBP1A	FK506 binding protein 1A, 12kDa	87
52	hsa-miR-148a-5p	DEK	DEK oncogene	87
53	hsa-miR-148a-5p	ZFP42	ZFP42 zinc finger protein	86
54	hsa-miR-148a-5p	ATP2B2	ATPase, Ca++ transporting, plasma membrane 2	86
55	hsa-miR-148a-5p	NUP50	nucleoporin 50kDa	86
56	hsa-miR-148a-5p	TMED7	transmembrane emp24 protein transport domain containing 7	86
57	hsa-miR-148a-5p	SP4	Sp4 transcription factor	86
58	hsa-miR-148a-5p	CLK4	CDC-like kinase 4	85
59	hsa-miR-148a-5p	DNASE2	deoxyribonuclease II, lysosomal	85
60	hsa-miR-148a-5p	SESTD1	SEC14 and spectrin domains 1	85
61	hsa-miR-148a-5p	TMEM199	transmembrane protein 199	85
62	hsa-miR-148a-5p	APPL1	adaptor protein, phosphotyrosine interaction, PH domain and leucine zipper containing 1	85
63	hsa-miR-148a-5p	RBMX	RNA binding motif protein, X-linked	85
64	hsa-miR-148a-5p	GOLIM4	golgi integral membrane protein 4	84
65	hsa-miR-148a-5p	NRCAM	neuronal cell adhesion molecule	84
66	hsa-miR-148a-5p	UBE2E3	ubiquitin-conjugating enzyme E2E 3	84
67	hsa-miR-148a-5p	HLCS	holocarboxylase synthetase (biotin-(proprionyl-CoA-carboxylase (ATP-hydrolysing)) ligase)	84
68	hsa-miR-148a-5p	ATP8A1	ATPase, aminophospholipid transporter (APLT), class I, type 8A, member 1	84
69	hsa-miR-148a-5p	TGM2	transglutaminase 2	84
70	hsa-miR-148a-5p	MAN1A2	mannosidase, alpha, class 1A, member 2	84
71	hsa-miR-148a-5p	STIL	SCL/TAL1 interrupting locus	84
72	hsa-miR-148a-5p	STAG2	stromal antigen 2	83
73	hsa-miR-148a-5p	COBLL1	cordon-bleu WH2 repeat protein-like 1	83
74	hsa-miR-148a-5p	RBBP6	retinoblastoma binding protein 6	83
75	hsa-miR-148a-5p	KIFC3	kinesin family member C3	83
76	hsa-miR-148a-5p	TXN2	thioredoxin 2	83
77	hsa-miR-148a-5p	CA12	carbonic anhydrase XII	82
78	hsa-miR-148a-5p	ZEB1	zinc finger E-box binding homeobox 1	82
79	hsa-miR-148a-5p	CDC6	cell division cycle 6	82
80	hsa-miR-148a-5p	AGL	amylo-alpha-1, 6-glucosidase, 4-alpha-glucanotransferase	82
81	hsa-miR-148a-5p	NOTCH2	notch 2	82
82	hsa-miR-148a-5p	TNPO2	transportin 2	82
83	hsa-miR-148a-5p	POU2F1	POU class 2 homeobox 1	81
84	hsa-miR-148a-5p	SLC7A11	solute carrier family 7 (anionic amino acid transporter light chain, xc- system), member 11	81
85	hsa-miR-148a-5p	TMEM212	transmembrane protein 212	81
86	hsa-miR-148a-5p	ZFR	zinc finger RNA binding protein	81
87	hsa-miR-148a-5p	SERINC5	serine incorporator 5	81
88	hsa-miR-148a-5p	MBLAC2	metallo-beta-lactamase domain containing 2	80
89	hsa-miR-148a-5p	CHL1	cell adhesion molecule L1-like	80
90	hsa-miR-148a-5p	PPARGC1A	peroxisome proliferator-activated receptor gamma, coactivator 1 alpha	80
91	hsa-miR-148a-5p	BTAF1	BTAF1 RNA polymerase II, B-TFIID transcription factor-associated, 170kDa	80
92	hsa-miR-148a-5p	TBL1XR1	transducin (beta)-like 1 X-linked receptor 1	80
93	hsa-miR-148a-5p	FREM2	FRAS1 related extracellular matrix protein 2	80
94	hsa-miR-148a-5p	RBM6	RNA binding motif protein 6	80
95	hsa-miR-148a-5p	BROX	BRO1 domain and CAAX motif containing	80
96	hsa-miR-148a-5p	PDPK1	3-phosphoinositide dependent protein kinase 1	79
97	hsa-miR-148a-5p	GALNTL6	polypeptide N-acetylgalactosaminyltransferase-like 6	79
98	hsa-miR-148a-5p	RIOK1	RIO kinase 1	79
99	hsa-miR-148a-5p	FAM169A	family with sequence similarity 169, member A	79
100	hsa-miR-148a-5p	CSNK1A1	casein kinase 1, alpha 1	79
101	hsa-miR-148a-5p	COL10A1	collagen, type X, alpha 1	79
102	hsa-miR-148a-5p	CX3CR1	chemokine (C-X3-C motif) receptor 1	78
103	hsa-miR-148a-5p	ETNK1	ethanolamine kinase 1	78
104	hsa-miR-148a-5p	VWC2	von Willebrand factor C domain containing 2	78
105	hsa-miR-148a-5p	TOX	thymocyte selection-associated high mobility group box	78
106	hsa-miR-148a-5p	GTF2A1	general transcription factor IIA, 1, 19/37kDa	78
107	hsa-miR-148a-5p	GOLGA1	golgin A1	78
108	hsa-miR-148a-5p	HSPA5	heat shock 70kDa protein 5 (glucose-regulated protein, 78kDa)	78
109	hsa-miR-148a-5p	HMGCLL1	3-hydroxymethyl-3-methylglutaryl-CoA lyase-like 1	78
110	hsa-miR-148a-5p	DLST	dihydrolipoamide S-succinyltransferase (E2 component of 2-oxo-glutarate complex)	77
111	hsa-miR-148a-5p	MDFIC	MyoD family inhibitor domain containing	77
112	hsa-miR-148a-5p	USP3	ubiquitin specific peptidase 3	77
113	hsa-miR-148a-5p	UBXN7	UBX domain protein 7	77
114	hsa-miR-148a-5p	PIGC	phosphatidylinositol glycan anchor biosynthesis, class C	77
115	hsa-miR-148a-5p	CTCF	CCCTC-binding factor (zinc finger protein)	77
116	hsa-miR-148a-5p	VGLL3	vestigial-like family member 3	76
117	hsa-miR-148a-5p	OCLN	occludin	76
118	hsa-miR-148a-5p	AKAP5	A kinase (PRKA) anchor protein 5	76
119	hsa-miR-148a-5p	ELAVL2	ELAV like neuron-specific RNA binding protein 2	76
120	hsa-miR-148a-5p	MYSM1	Myb-like, SWIRM and MPN domains 1	76
121	hsa-miR-148a-5p	TLE4	transducin-like enhancer of split 4	76
122	hsa-miR-148a-5p	ACTG1	actin, gamma 1	76
123	hsa-miR-148a-5p	GTF2E1	general transcription factor IIE, polypeptide 1, alpha 56kDa	76
124	hsa-miR-148a-5p	AIM1	absent in melanoma 1	76
125	hsa-miR-148a-5p	MYO5C	myosin VC	75
126	hsa-miR-148a-5p	TOLLIP	toll interacting protein	75
127	hsa-miR-148a-5p	FANCD2	Fanconi anemia, complementation group D2	75
128	hsa-miR-148a-5p	FERMT1	fermitin family member 1	75
129	hsa-miR-148a-5p	FAM46A	family with sequence similarity 46, member A	75
130	hsa-miR-148a-5p	P4HA1	prolyl 4-hydroxylase, alpha polypeptide I	75
131	hsa-miR-148a-5p	C21orf59	chromosome 21 open reading frame 59	75
132	hsa-miR-148a-5p	RAI14	retinoic acid induced 14	75
133	hsa-miR-148a-5p	SLC30A10	solute carrier family 30, member 10	75
134	hsa-miR-148a-5p	G3BP2	GTPase activating protein (SH3 domain) binding protein 2	74
135	hsa-miR-148a-5p	ZNF225	zinc finger protein 225	74
136	hsa-miR-148a-5p	ANK2	ankyrin 2, neuronal	74
137	hsa-miR-148a-5p	NIN	ninein (GSK3B interacting protein)	74
138	hsa-miR-148a-5p	RBMXL1	RNA binding motif protein, X-linked-like 1	74
139	hsa-miR-148a-5p	RCN2	reticulocalbin 2, EF-hand calcium binding domain	74
140	hsa-miR-148a-5p	INA	internexin neuronal intermediate filament protein, alpha	73
141	hsa-miR-148a-5p	C3orf38	chromosome 3 open reading frame 38	73
142	hsa-miR-148a-5p	NCOA2	nuclear receptor coactivator 2	73
143	hsa-miR-148a-5p	SLC8A1	solute carrier family 8 (sodium/calcium exchanger), member 1	73
144	hsa-miR-148a-5p	GNAI3	guanine nucleotide binding protein (G protein), alpha inhibiting activity polypeptide 3	73
145	hsa-miR-148a-5p	PDLIM5	PDZ and LIM domain 5	73
146	hsa-miR-148a-5p	C3orf70	chromosome 3 open reading frame 70	73
147	hsa-miR-148a-5p	FAM13B	family with sequence similarity 13, member B	73
148	hsa-miR-148a-5p	TMEM123	transmembrane protein 123	72
149	hsa-miR-148a-5p	WWC2	WW and C2 domain containing 2	72
150	hsa-miR-148a-5p	SPPL3	signal peptide peptidase like 3	72
151	hsa-miR-148a-5p	UBE3A	ubiquitin protein ligase E3A	72
152	hsa-miR-148a-5p	HIST1H2BD	histone cluster 1, H2bd	72
153	hsa-miR-148a-5p	EBF2	early B-cell factor 2	71
154	hsa-miR-148a-5p	LRRC15	leucine rich repeat containing 15	71
155	hsa-miR-148a-5p	CYorf17	chromosome Y open reading frame 17	71
156	hsa-miR-148a-5p	ZNF214	zinc finger protein 214	71
157	hsa-miR-148a-5p	CCNT2	cyclin T2	71
158	hsa-miR-148a-5p	RBM24	RNA binding motif protein 24	71
159	hsa-miR-148a-5p	SGIP1	SH3-domain GRB2-like (endophilin) interacting protein 1	71
160	hsa-miR-148a-5p	TCEAL1	transcription elongation factor A (SII)-like 1	70
161	hsa-miR-148a-5p	UNC5C	unc-5 homolog C (C. elegans)	70
162	hsa-miR-148a-5p	HORMAD1	HORMA domain containing 1	70
163	hsa-miR-148a-5p	CCDC88A	coiled-coil domain containing 88A	70
164	hsa-miR-148a-5p	CHM	choroideremia (Rab escort protein 1)	70
165	hsa-miR-148a-5p	PTPRJ	protein tyrosine phosphatase, receptor type, J	70
166	hsa-miR-148a-5p	RAB14	RAB14, member RAS oncogene family	70
167	hsa-miR-148a-5p	RBAK	RB-associated KRAB zinc finger	70
168	hsa-miR-148a-5p	CERS6	ceramide synthase 6	69
169	hsa-miR-148a-5p	RPS6KB1	ribosomal protein S6 kinase, 70kDa, polypeptide 1	69
170	hsa-miR-148a-5p	TRIM6-TRIM34	TRIM6-TRIM34 readthrough	69
171	hsa-miR-148a-5p	NIPSNAP1	nipsnap homolog 1 (C. elegans)	69
172	hsa-miR-148a-5p	TRIM34	tripartite motif containing 34	69
173	hsa-miR-148a-5p	C6orf62	chromosome 6 open reading frame 62	69
174	hsa-miR-148a-5p	CDC73	cell division cycle 73	69
175	hsa-miR-148a-5p	GSG1	germ cell associated 1	69
176	hsa-miR-148a-5p	EDN2	endothelin 2	69
177	hsa-miR-148a-5p	VANGL1	VANGL planar cell polarity protein 1	68
178	hsa-miR-148a-5p	SRI	sorcin	68
179	hsa-miR-148a-5p	ZNF292	zinc finger protein 292	68
180	hsa-miR-148a-5p	ESM1	endothelial cell-specific molecule 1	68
181	hsa-miR-148a-5p	DLC1	deleted in liver cancer 1	68
182	hsa-miR-148a-5p	CLEC10A	C-type lectin domain family 10, member A	68
183	hsa-miR-148a-5p	SYNJ2BP	synaptojanin 2 binding protein	68
184	hsa-miR-148a-5p	ZHX1	zinc fingers and homeoboxes 1	67
185	hsa-miR-148a-5p	NEK9	NIMA-related kinase 9	67
186	hsa-miR-148a-5p	DUSP6	dual specificity phosphatase 6	67
187	hsa-miR-148a-5p	KATNAL2	katanin p60 subunit A-like 2	67
188	hsa-miR-148a-5p	PCYOX1	prenylcysteine oxidase 1	67
189	hsa-miR-148a-5p	AFF2	AF4/FMR2 family, member 2	67
190	hsa-miR-148a-5p	MARCKS	myristoylated alanine-rich protein kinase C substrate	67
191	hsa-miR-148a-5p	USP7	ubiquitin specific peptidase 7 (herpes virus-associated)	67
192	hsa-miR-148a-5p	SEMA5A	sema domain, seven thrombospondin repeats (type 1 and type 1-like), transmembrane domain (TM) and short cytoplasmic domain, (semaphorin) 5A	67
193	hsa-miR-148a-5p	ADSS	adenylosuccinate synthase	67
194	hsa-miR-148a-5p	GJA1	gap junction protein, alpha 1, 43kDa	67
195	hsa-miR-148a-5p	NDUFAF7	NADH dehydrogenase (ubiquinone) complex I, assembly factor 7	66
196	hsa-miR-148a-5p	TMEM245	transmembrane protein 245	66
197	hsa-miR-148a-5p	FAM102B	family with sequence similarity 102, member B	66
198	hsa-miR-148a-5p	SPTY2D1	SPT2, Suppressor of Ty, domain containing 1 (S. cerevisiae)	66
199	hsa-miR-148a-5p	KDM4C	lysine (K)-specific demethylase 4C	66
200	hsa-miR-148a-5p	SPTLC2	serine palmitoyltransferase, long chain base subunit 2	66
201	hsa-miR-148a-5p	PACSIN2	protein kinase C and casein kinase substrate in neurons 2	66
202	hsa-miR-148a-5p	SMEK2	SMEK homolog 2, suppressor of mek1 (Dictyostelium)	66
203	hsa-miR-148a-5p	PPP2R2A	protein phosphatase 2, regulatory subunit B, alpha	66
204	hsa-miR-148a-5p	LPCAT2	lysophosphatidylcholine acyltransferase 2	65
205	hsa-miR-148a-5p	SGCB	sarcoglycan, beta (43kDa dystrophin-associated glycoprotein)	65
206	hsa-miR-148a-5p	SYNM	synemin, intermediate filament protein	65
207	hsa-miR-148a-5p	HEBP1	heme binding protein 1	65
208	hsa-miR-148a-5p	ASAH1	N-acylsphingosine amidohydrolase (acid ceramidase) 1	65
209	hsa-miR-148a-5p	CCDC14	coiled-coil domain containing 14	65
210	hsa-miR-148a-5p	TMEM155	transmembrane protein 155	65
211	hsa-miR-148a-5p	SIK1	salt-inducible kinase 1	65
212	hsa-miR-148a-5p	CLHC1	clathrin heavy chain linker domain containing 1	65
213	hsa-miR-148a-5p	PKD2L2	polycystic kidney disease 2-like 2	64
214	hsa-miR-148a-5p	MMD	monocyte to macrophage differentiation-associated	64
215	hsa-miR-148a-5p	C10orf32	chromosome 10 open reading frame 32	64
216	hsa-miR-148a-5p	PHF3	PHD finger protein 3	64
217	hsa-miR-148a-5p	CANX	calnexin	64
218	hsa-miR-148a-5p	GNPTAB	N-acetylglucosamine-1-phosphate transferase, alpha and beta subunits	64
219	hsa-miR-148a-5p	PCSK6	proprotein convertase subtilisin/kexin type 6	64
220	hsa-miR-148a-5p	10-Sep	septin 10	64
221	hsa-miR-148a-5p	LXN	latexin	64
222	hsa-miR-148a-5p	PRR27	proline rich 27	64
223	hsa-miR-148a-5p	ZKSCAN2	zinc finger with KRAB and SCAN domains 2	64
224	hsa-miR-148a-5p	GIGYF2	GRB10 interacting GYF protein 2	63
225	hsa-miR-148a-5p	DSC2	desmocollin 2	63
226	hsa-miR-148a-5p	SPAG1	sperm associated antigen 1	63
227	hsa-miR-148a-5p	TPST2	tyrosylprotein sulfotransferase 2	63
228	hsa-miR-148a-5p	SACM1L	SAC1 suppressor of actin mutations 1-like (yeast)	63
229	hsa-miR-148a-5p	IQGAP2	IQ motif containing GTPase activating protein 2	63
230	hsa-miR-148a-5p	STK17A	serine/threonine kinase 17a	63
231	hsa-miR-148a-5p	TP53INP2	tumor protein p53 inducible nuclear protein 2	63
232	hsa-miR-148a-5p	PRKG2	protein kinase, cGMP-dependent, type II	63
233	hsa-miR-148a-5p	SAMD8	sterile alpha motif domain containing 8	63
234	hsa-miR-148a-5p	IL1R1	interleukin 1 receptor, type I	62
235	hsa-miR-148a-5p	ABHD13	abhydrolase domain containing 13	62
236	hsa-miR-148a-5p	MRC1	mannose receptor, C type 1	62
237	hsa-miR-148a-5p	GPR88	G protein-coupled receptor 88	62
238	hsa-miR-148a-5p	PPP2R5E	protein phosphatase 2, regulatory subunit B', epsilon isoform	62
239	hsa-miR-148a-5p	MB21D2	Mab-21 domain containing 2	62
240	hsa-miR-148a-5p	FAM92A1	family with sequence similarity 92, member A1	62
241	hsa-miR-148a-5p	SYNCRIP	synaptotagmin binding, cytoplasmic RNA interacting protein	62
242	hsa-miR-148a-5p	NR3C2	nuclear receptor subfamily 3, group C, member 2	62
243	hsa-miR-148a-5p	SV2A	synaptic vesicle glycoprotein 2A	62
244	hsa-miR-148a-5p	MATR3	matrin 3	62
245	hsa-miR-148a-5p	FAM160A2	family with sequence similarity 160, member A2	62
246	hsa-miR-148a-5p	PDE3A	phosphodiesterase 3A, cGMP-inhibited	61
247	hsa-miR-148a-5p	TSC22D2	TSC22 domain family, member 2	61
248	hsa-miR-148a-5p	NDUFAF4	NADH dehydrogenase (ubiquinone) complex I, assembly factor 4	61
249	hsa-miR-148a-5p	TXNRD2	thioredoxin reductase 2	61
250	hsa-miR-148a-5p	NOVA1	neuro-oncological ventral antigen 1	61
251	hsa-miR-148a-5p	KMT2C	lysine (K)-specific methyltransferase 2C	61
252	hsa-miR-148a-5p	WDR16	WD repeat domain 16	61
253	hsa-miR-148a-5p	CYCS	cytochrome c, somatic	61
254	hsa-miR-148a-5p	SCN3B	sodium channel, voltage-gated, type III, beta subunit	61
255	hsa-miR-148a-5p	GRSF1	G-rich RNA sequence binding factor 1	61
256	hsa-miR-148a-5p	BEND2	BEN domain containing 2	60
257	hsa-miR-148a-5p	LMO1	LIM domain only 1 (rhombotin 1)	60
258	hsa-miR-148a-5p	CGREF1	cell growth regulator with EF-hand domain 1	60
259	hsa-miR-148a-5p	GATC	glutamyl-tRNA(Gln) amidotransferase, subunit C	60
260	hsa-miR-148a-5p	ID4	inhibitor of DNA binding 4, dominant negative helix-loop-helix protein	60
261	hsa-miR-148a-5p	RAB11A	RAB11A, member RAS oncogene family	60
262	hsa-miR-148a-5p	GFOD2	glucose-fructose oxidoreductase domain containing 2	60
263	hsa-miR-148a-5p	CACNA1D	calcium channel, voltage-dependent, L type, alpha 1D subunit	60
264	hsa-miR-148a-5p	CCDC6	coiled-coil domain containing 6	60
265	hsa-miR-148a-5p	WDR76	WD repeat domain 76	60
266	hsa-miR-148a-5p	SLC30A7	solute carrier family 30 (zinc transporter), member 7	60
267	hsa-miR-148a-5p	CNNM1	cyclin M1	60
268	hsa-miR-148a-5p	ESYT1	extended synaptotagmin-like protein 1	60
269	hsa-miR-148a-5p	NCAPG	non-SMC condensin I complex, subunit G	60
270	hsa-miR-148a-5p	GHITM	growth hormone inducible transmembrane protein	60
271	hsa-miR-148a-5p	SLC22A15	solute carrier family 22, member 15	60
272	hsa-miR-148a-5p	UBXN8	UBX domain protein 8	60
273	hsa-miR-148a-5p	SATB2	SATB homeobox 2	60
274	hsa-miR-148a-5p	TBC1D14	TBC1 domain family, member 14	60
275	hsa-miR-148a-5p	SLC38A1	solute carrier family 38, member 1	60
276	hsa-miR-148a-5p	SETD2	SET domain containing 2	60
277	hsa-miR-148a-5p	TMEM167B	transmembrane protein 167B	59
278	hsa-miR-148a-5p	MEGF10	multiple EGF-like-domains 10	59
279	hsa-miR-148a-5p	ZNF655	zinc finger protein 655	59
280	hsa-miR-148a-5p	UBN2	ubinuclein 2	59
281	hsa-miR-148a-5p	ANKRD13C	ankyrin repeat domain 13C	59
282	hsa-miR-148a-5p	EPHA5	EPH receptor A5	59
283	hsa-miR-148a-5p	ARHGAP29	Rho GTPase activating protein 29	59
284	hsa-miR-148a-5p	ARID1A	AT rich interactive domain 1A (SWI-like)	59
285	hsa-miR-148a-5p	RORA	RAR-related orphan receptor A	59
286	hsa-miR-148a-5p	TMEM236	transmembrane protein 236	59
287	hsa-miR-148a-5p	HMGB1	high mobility group box 1	59
288	hsa-miR-148a-5p	GNB1	guanine nucleotide binding protein (G protein), beta polypeptide 1	59
289	hsa-miR-148a-5p	LONRF1	LON peptidase N-terminal domain and ring finger 1	59
290	hsa-miR-148a-5p	KCNK1	potassium channel, subfamily K, member 1	59
291	hsa-miR-148a-5p	SMG1	SMG1 phosphatidylinositol 3-kinase-related kinase	59
292	hsa-miR-148a-5p	IL22RA2	interleukin 22 receptor, alpha 2	58
293	hsa-miR-148a-5p	YBX1	Y box binding protein 1	58
294	hsa-miR-148a-5p	NFIB	nuclear factor I/B	58
295	hsa-miR-148a-5p	TGS1	trimethylguanosine synthase 1	58
296	hsa-miR-148a-5p	CYP4V2	cytochrome P450, family 4, subfamily V, polypeptide 2	58
297	hsa-miR-148a-5p	RIF1	RAP1 interacting factor homolog (yeast)	58
298	hsa-miR-148a-5p	GUCY2C	guanylate cyclase 2C (heat stable enterotoxin receptor)	58
299	hsa-miR-148a-5p	ZC3H14	zinc finger CCCH-type containing 14	58
300	hsa-miR-148a-5p	LMLN	leishmanolysin-like (metallopeptidase M8 family)	58
301	hsa-miR-148a-5p	ZNF777	zinc finger protein 777	57
302	hsa-miR-148a-5p	NBR1	neighbor of BRCA1 gene 1	57
303	hsa-miR-148a-5p	IL27	interleukin 27	57
304	hsa-miR-148a-5p	KIAA1524	KIAA1524	57
305	hsa-miR-148a-5p	GPR158	G protein-coupled receptor 158	57
306	hsa-miR-148a-5p	TTC30B	tetratricopeptide repeat domain 30B	57
307	hsa-miR-148a-5p	GDA	guanine deaminase	56
308	hsa-miR-148a-5p	ATP6V1G3	ATPase, H+ transporting, lysosomal 13kDa, V1 subunit G3	56
309	hsa-miR-148a-5p	PAK2	p21 protein (Cdc42/Rac)-activated kinase 2	56
310	hsa-miR-148a-5p	PMM1	phosphomannomutase 1	56
311	hsa-miR-148a-5p	FBXL5	F-box and leucine-rich repeat protein 5	56
312	hsa-miR-148a-5p	SMC5	structural maintenance of chromosomes 5	56
313	hsa-miR-148a-5p	PDCD5	programmed cell death 5	56
314	hsa-miR-148a-5p	ZNF148	zinc finger protein 148	56
315	hsa-miR-148a-5p	SURF4	surfeit 4	56
316	hsa-miR-148a-5p	EEA1	early endosome antigen 1	56
317	hsa-miR-148a-5p	TOMM20	translocase of outer mitochondrial membrane 20 homolog (yeast)	56
318	hsa-miR-148a-5p	RAP2C	RAP2C, member of RAS oncogene family	56
319	hsa-miR-148a-5p	TAB2	TGF-beta activated kinase 1/MAP3K7 binding protein 2	56
320	hsa-miR-148a-5p	RPF1	ribosome production factor 1 homolog (S. cerevisiae)	56
321	hsa-miR-148a-5p	LEFTY2	left-right determination factor 2	55
322	hsa-miR-148a-5p	MOB3B	MOB kinase activator 3B	55
323	hsa-miR-148a-5p	CIPC	CLOCK-interacting pacemaker	55
324	hsa-miR-148a-5p	ZNF117	zinc finger protein 117	55
325	hsa-miR-148a-5p	SLC16A9	solute carrier family 16, member 9	55
326	hsa-miR-148a-5p	NT5DC1	5'-nucleotidase domain containing 1	55
327	hsa-miR-148a-5p	CCSAP	centriole, cilia and spindle-associated protein	54
328	hsa-miR-148a-5p	MBNL1	muscleblind-like splicing regulator 1	54
329	hsa-miR-148a-5p	NAA25	N(alpha)-acetyltransferase 25, NatB auxiliary subunit	54
330	hsa-miR-148a-5p	NF1	neurofibromin 1	54
331	hsa-miR-148a-5p	MYC	v-myc avian myelocytomatosis viral oncogene homolog	54
332	hsa-miR-148a-5p	LAP3	leucine aminopeptidase 3	54
333	hsa-miR-148a-5p	ZMYM2	zinc finger, MYM-type 2	54
334	hsa-miR-148a-5p	TP53TG3C	TP53 target 3C	54
335	hsa-miR-148a-5p	ELK3	ELK3, ETS-domain protein (SRF accessory protein 2)	54
336	hsa-miR-148a-5p	NAT10	N-acetyltransferase 10 (GCN5-related)	54
337	hsa-miR-148a-5p	STK4	serine/threonine kinase 4	54
338	hsa-miR-148a-5p	VASH2	vasohibin 2	53
339	hsa-miR-148a-5p	HSD17B13	hydroxysteroid (17-beta) dehydrogenase 13	53
340	hsa-miR-148a-5p	ATF6	activating transcription factor 6	53
341	hsa-miR-148a-5p	OIP5	Opa interacting protein 5	53
342	hsa-miR-148a-5p	ZDHHC9	zinc finger, DHHC-type containing 9	53
343	hsa-miR-148a-5p	PCM1	pericentriolar material 1	53
344	hsa-miR-148a-5p	LOC102724101	TP53-target gene 3 protein-like	53
345	hsa-miR-148a-5p	PPFIBP1	PTPRF interacting protein, binding protein 1 (liprin beta 1)	53
346	hsa-miR-148a-5p	COL19A1	collagen, type XIX, alpha 1	53
347	hsa-miR-148a-5p	TPP1	tripeptidyl peptidase I	53
348	hsa-miR-148a-5p	RER1	retention in endoplasmic reticulum sorting receptor 1	53
349	hsa-miR-148a-5p	ZNF280C	zinc finger protein 280C	53
350	hsa-miR-148a-5p	PHTF1	putative homeodomain transcription factor 1	53
351	hsa-miR-148a-5p	CDCA4	cell division cycle associated 4	53
352	hsa-miR-148a-5p	ZBTB43	zinc finger and BTB domain containing 43	52
353	hsa-miR-148a-5p	TSN	translin	52
354	hsa-miR-148a-5p	NABP1	nucleic acid binding protein 1	52
355	hsa-miR-148a-5p	LOC102723655	TP53-target gene 3 protein-like	52
356	hsa-miR-148a-5p	FAM122B	family with sequence similarity 122B	52
357	hsa-miR-148a-5p	MAP4K4	mitogen-activated protein kinase kinase kinase kinase 4	52
358	hsa-miR-148a-5p	PCSK5	proprotein convertase subtilisin/kexin type 5	52
359	hsa-miR-148a-5p	RIMKLB	ribosomal modification protein rimK-like family member B	52
360	hsa-miR-148a-5p	LIN7C	lin-7 homolog C (C. elegans)	52
361	hsa-miR-148a-5p	VEPH1	ventricular zone expressed PH domain-containing 1	52
362	hsa-miR-148a-5p	PNPLA2	patatin-like phospholipase domain containing 2	52
363	hsa-miR-148a-5p	TP53TG3B	TP53 target 3B	52
364	hsa-miR-148a-5p	TP53TG3D	TP53 target 3D	52
365	hsa-miR-148a-5p	ASB4	ankyrin repeat and SOCS box containing 4	52
366	hsa-miR-148a-5p	PM20D1	peptidase M20 domain containing 1	52
367	hsa-miR-148a-5p	TP53TG3	TP53 target 3	52
368	hsa-miR-148a-5p	LOC102723713	TP53-target gene 3 protein-like	52
369	hsa-miR-148a-5p	SDR42E1	short chain dehydrogenase/reductase family 42E, member 1	52
370	hsa-miR-148a-5p	OGT	O-linked N-acetylglucosamine (GlcNAc) transferase	51
371	hsa-miR-148a-5p	VWA9	von Willebrand factor A domain containing 9	51
372	hsa-miR-148a-5p	EDNRB	endothelin receptor type B	51
373	hsa-miR-148a-5p	IKZF5	IKAROS family zinc finger 5 (Pegasus)	51
374	hsa-miR-148a-5p	KLHL24	kelch-like family member 24	51
375	hsa-miR-148a-5p	ZNF33A	zinc finger protein 33A	51
376	hsa-miR-148a-5p	TMEM235	transmembrane protein 235	51
377	hsa-miR-148a-5p	MAU2	MAU2 sister chromatid cohesion factor	51
378	hsa-miR-148a-5p	LOC102724127	TP53-target gene 3 protein-like	51
379	hsa-miR-148a-5p	CLNS1A	chloride channel, nucleotide-sensitive, 1A	51
380	hsa-miR-148a-5p	SLC9A6	solute carrier family 9, subfamily A (NHE6, cation proton antiporter 6), member 6	50
381	hsa-miR-148a-5p	FKTN	fukutin	50
382	hsa-miR-148a-5p	SGOL1	shugoshin-like 1 (S. pombe)	50
383	hsa-miR-148a-5p	DNAJC24	DnaJ (Hsp40) homolog, subfamily C, member 24	50
384	hsa-miR-148a-5p	MICU2	mitochondrial calcium uptake 2	50
385	hsa-miR-148a-5p	ADH1B	alcohol dehydrogenase 1B (class I), beta polypeptide	50
386	hsa-miR-148a-5p	VIMP	VCP-interacting membrane protein	50
387	hsa-miR-148a-5p	CYTIP	cytohesin 1 interacting protein	50
388	hsa-miR-148a-5p	EXD2	exonuclease 3'-5' domain containing 2	50

## Sheet: S1_ovelap>=2
206 common elements in "TargetScan", "DIANA-microT" and "miRDB":	669 common elements in "TargetScan" and "DIANA-microT":	120 common elements in "TargetScan" and "miRDB":	35 common elements in "DIANA-microT" and "miRDB":
TMEM212	RP11-210M15.2	ATP6V1G3	UBR3
PHTF2	GMFB	CYorf17	APPL1
PIGC	HIST1H2AG	PDCD5	CHL1
FAM169A	TMED5	HEBP1	MEGF10
NIN	IFI6	DNAJC24	RBM6
IL22RA2	GJB5	TP53TG3B	GJA1
TXN2	MAGEA11	OIP5	HNRNPH3
ESM1	SERPINH1	NIPSNAP1	LPCAT2
TP53TG3D	CYP3A5	MICU2	TGS1
GSR	RRS1	GATC	RBMX
C6orf62	UCHL5	PPP2R2A	ZC3H14
TP53TG3	TMEM232	MBLAC2	ZNF33A
TP53TG3C	FGF5	LXN	PCYOX1
HSPA5	ZNF300	TMEM167B	BTAF1
SPOCK3	PATE2	WDR16	ELK3
CDC73	C19orf82	ZNF214	ETNK1
VASH2	TFRC	PHTF1	GTF2E1
TMED7	FKBP3	FAM102B	RIF1
COL10A1	ERLIN1	MDFIC	RBBP6
AGL	ZNF846	RER1	FKTN
RAB8B	AGMAT	ZNF225	WDR76
UBE2G1	MAB21L1	HLCS	CDC6
DNASE2	SEPT10	ZNF655	CANX
CSNK1A1	OPALIN	CYP4V2	MRC1
ZFP42	C7orf13	REEP1	CTCF
STIL	SIGLEC12	SLC11A2	FREM2
NUP50	PIK3C2A	ESYT1	IQGAP2
SIX4	ZNF589	HORMAD1	PTPRJ
THUMPD3	ANKRD49	RBMXL1	SOCS5
ABRACL	FDXACB1	LMO1	CIPC
LEFTY2	CLEC1B	GHITM	CERS6
USP3	PPP1R1C	IL27	CCNT2
EDN2	SMKR1	STK17A	RPS6KB1
C21orf59	JMJD1C	TMEM155	SPAG1
TCEAL1	GABRG2	FANCD2	SP4
NBR1	SIAE	FAM160A2
MARCKS	CDC42SE2	UBE2QL1
DEK	TPTE	TPP1
PDPK1	ZMAT1	ZNF117
COBLL1	FGF10	BROX
YBX1	C2orf91	SLC22A15
CX3CR1	FAM111B	KIFC3
HMGCLL1	SETD6	PMM1
G3BP2	COLEC12	CA12
ADSS	PKP2	ACTG1
C3orf38	KHSRP	PAPOLA
AKAP5	PSME3	CYTIP
TOMM20	ELL3	KDM4C
GOLIM4	C1orf52	ASAH1
RIOK1	GJC1	SDR42E1
TMEM235	C5orf54	GUCY2C
GPR88	HMGCS2	RBAK
RNF111	PSTK	PKD2L2
TMEM236	GTF3C6	PACSIN2
ASB4	C4orf46	CCDC14
FAM92A1	METTL14	PCSK5
FKBP1A	GYPA	SATB2
RCN2	ELF1	SGIP1
CACUL1	GTPBP3	ZDHHC9
KMT2C	THUMPD1	HSD17B13
SACM1L	AC012215.1	CLHC1
RBM24	CREG1	PNPLA2
CDCA4	BNIP2	C3orf70
MMD	GRAMD1C	CDKL2
SMC5	C1orf213	CLK4
VWA9	ZFP30	ADH1B
TTC30B	TMEM213	RIMKLB
SRI	WBP5	CCSAP
TRIM34	TRMT61B	SLC16A9
MYC	PSG11	SGCB
ETF1	H2AFY2	SYNM
C10orf32	MIPEP	HMGB1
KDM6A	PRPF18	SLC9A6
SURF4	PARD6G	KIAA1524
SPPL3	OFCC1	DLC1
CHM	ZNF37A	SLC30A10
LMLN	ANKRD34B	SCN3B
TRIM6-TRIM34	SUPT4H1	TMEM181
SLC38A1	GRIN2B	CLNS1A
P4HA1	ZNF30	MOB3B
YIPF5	FKBP1C	RPF1
SLIT3	LHFPL5	MBNL1
SPTY2D1	DNA2	USP7
TPST2	NAT16	UBE3A
FAM117B	FAM63B	SYNJ2BP
MEMO1	MEX3A	PRKG2
ATG16L1	OGN	TBC1D14
FLRT3	ZRANB1	TSN
GNAI3	SIGLEC6	AIM1
EXD2	CBWD7	PDE3A
MAN1A2	EID2	FERMT1
PPFIBP1	MEI4	BEND2
VGLL3	SUCNR1	PCM1
SETD2	UCP1	CGREF1
FBXL3	KIF3A	CELF1
INA	AL161915.1	FAM46A
PM20D1	PIGM	NCOA2
ZNF777	YES1	SERINC5
MYO5C	TMEM154	ARHGAP29
WWC2	ESF1	RTKN2
CNTN1	CSRNP3	NR3C2
ZHX1	PSMA5	SV2A
LONRF1	RP11-664D7.4	STK4
NABP1	CLEC5A	SPTLC2
LSM14A	RNF2	TOLLIP
UBE2E3	GEM	TLE4
CCDC6	SMAD5	TBL1XR1
PTGS1	CBWD6	GNPTAB
MATR3	MAP3K15	MB21D2
ZNF280C	ZNF736	PDLIM5
LRRC15	GAS2L3	FBXL5
PPARGC1A	FASTKD3	NOTCH2
RAP2C	RNFT1	TOX
KIF3B	ZNF239	KCNK1
TSC22D2	FAM73A	VANGL1
TMEM123	CRY1	ATF6
ARID1A	SH2D2A	GSG1
RORA	NKAIN2	GRSF1
TNPO2	PPIC	NDUFAF4
KIF13A	TEX9	ANKRD13C
POU2F1	RHPN2
COL5A2	LAT2
ZEB1	RCBTB1
ID4	CD2AP
PCGF3	SNX19
SGOL1	FAM199X
GOLGA1	SOX11
GDA	MAK16
CYCS	TMSB4X
GALNTL6	TMEM170A
DLST	GPR137B
FAM13B	NGLY1
SMEK2	ALAD
ANK2	NAA11
EDNRB	FAM9B
SESTD1	PPP3R2
SLC7A2	DPYD
ZNF148	ATP2C1
UBN2	ZCCHC6
NT5E	STARD13
GNB1	ST3GAL3
OCLN	DST
ARHGEF18	ZMPSTE24
SIK1	C4orf26
CCDC88A	CORO1C
STAG2	FAM122A
GTF2A1	FOXR2
NLGN1	TNF
UBXN7	TMEM57
VWC2	VPS13B
ATP2B2	LDLRAD3
EPHA5	TRMT13
ZNF292	TBCCD1
CXorf23	CALR
NEK9	RAB30
LIN7C	METAP1D
SLC30A7	ZNF197
ZBTB43	SYAP1
SAMD8	MRC1L1
TMEM245	PTEN
NAA25	C21orf54
MYSM1	SNAPC3
ZMYM2	INTS2
ABHD13	KCTD10
IL1R1	EIF5AL1
GPR158	GALNT12
IKZF5	KIF16B
NFIB	EIF4G3
ELAVL2	ERVMER34-1
ATP8A1	C10orf67
ZFR	CCDC18
NOVA1	IPO8
TGM2	FPGS
AFF2	IFNG
KLHL24	TMF1
PAK2	DCAF4L1
COL19A1	KDELC2
PLXNA2	KDM3A
NT5DC1	PURA
SUV420H1	AL353791.1
NRCAM	KITLG
TAB2	RASGEF1B
UNC5C	CAMK2N1
OGT	ITCH
SMG1	RAB11FIP2
CNNM1	FOXN3
ZKSCAN2	IL33
SLC8A1	AC024257.1
FAM122B	FUT10
MAP4K4	KLF9
DSC2	UBE2W
RAB14	USP6
TP53INP2	PRRG1
SEMA5A	TC2N
CPEB3	PDE7A
PPP2R5E	ZNF41
SLC7A11	ORC2
EEA1	TNKS2
GIGYF2	ADAMTS18
EBF2	ZNF550
NF1	CLIC4
RAB11A	TMEM242
CLCC1	PRIMA1
SCN9A	GINM1
DUSP6	USP48
TROVE2	REEP3
	AKAP10
	OR2C3
	ADAM12
	MTM1
	FST
	KCNH7
	HNF4G
	SH2D4B
	IRX2
	GIPC2
	LRRTM3
	RRN3
	SLC4A4
	PSME1
	VPS37D
	ZNF112
	C1QTNF6
	CLASP1
	VTI1B
	TNFAIP8
	SLC30A1
	CTAGE1
	FAM167A
	SCML1
	SYT10
	SMAD9
	VKORC1L1
	AJAP1
	RASA4
	VAPB
	EPB41L5
	ZBTB37
	USP46
	GLRB
	C21orf91
	SGK3
	FSTL1
	AGPAT4
	AMPD3
	SUDS3
	FRY
	WIPF1
	KLHDC1
	PANK3
	RUFY3
	ARL5B
	RC3H1
	FAM9C
	GRM3
	RFFL
	TMEM131
	CYP2U1
	L3MBTL3
	WDR33
	METTL9
	KBTBD7
	SULT1B1
	TSC22D3
	KCNJ6
	COPS4
	OAS2
	AHCTF1
	ARHGAP6
	PRDM10
	TCEAL8
	ZBTB7C
	BARHL2
	KCND3
	UBE2I
	TMEM56
	TENM2
	ST6GAL2
	ZMAT3
	TRIM2
	AKAP12
	ZIC5
	C15orf54
	PBX3
	RANBP6
	PUM1
	TRAPPC13
	LARP1B
	ZSCAN23
	GNPDA2
	ZBTB10
	KIAA1715
	MED14
	ANKRD34C
	ENPP5
	GTDC1
	EIF4E3
	DYRK1A
	CDK6
	ACVR1C
	MIER1
	DOCK10
	PIK3CD
	TSHZ3
	CLEC1A
	ARL10
	ALDH3A2
	CREB1
	PLD5
	GLIS1
	PAQR3
	MLK4
	PTPRG
	RBBP4
	PCGF5
	DCAF12
	ELOVL5
	KCNQ3
	FAM83F
	KLHL14
	TRPS1
	MTX3
	LRP2BP
	SRSF2
	SLC4A5
	LRP12
	GPC6
	LDLRAD4
	PPM1A
	RIT1
	SCAMP1
	SLC41A2
	HIPK2
	FOXO3
	RND3
	KMT2A
	SLC25A40
	MRPS10
	SASS6
	PRKG1
	ZRANB2
	CLIP1
	TRPM7
	COL4A3
	FAM45A
	PGAP1
	ENY2
	MICU3
	IKZF2
	GNA13
	LUZP2
	SPAST
	TFAP2E
	ALX4
	VTA1
	PDE4D
	PHACTR2
	TRIM23
	ZNF281
	FRRS1L
	CSF2RB
	KIAA1551
	ABCG2
	TAF8
	LCOR
	KLF12
	MTDH
	ITGA6
	HERC4
	AL953854.2
	ADAMTS3
	BCL2L11
	RPS23
	TRIM59
	BMPR1A
	JAM2
	FLT1
	RTTN
	ICK
	CTNNB1
	SSR3
	ABL2
	ARHGAP28
	MAML2
	NPAT
	MGAT5
	TOP2A
	ONECUT2
	WDR26
	C10orf118
	INTU
	F11R
	CLUH
	LAT
	EDARADD
	FMR1
	PTBP3
	SOS1
	TPP2
	LYST
	RNF219
	SRSF10
	C12orf23
	PKHD1
	EBF3
	GLRA3
	IGF2BP3
	MBNL3
	RRAGD
	DDI2
	TSHZ2
	PRDX6
	PAK3
	FBXO28
	ATAD2B
	PANK1
	SEL1L
	DDR1
	PSD3
	KLHL8
	LYRM7
	C4orf40
	RSF1
	KLHL2
	FAM46C
	SERBP1
	ATXN1
	PPTC7
	CACNA2D1
	ZNF587
	BRWD1
	GPX6
	SOAT1
	DIEXF
	TMEM38B
	KAL1
	PKN2
	CCDC144NL
	WNT2B
	PYGO1
	TSPAN6
	PALM2
	PDE10A
	PRSS12
	APBA1
	FZD4
	TET2
	SULF1
	CCDC144A
	TNS1
	NR1D2
	HELZ
	TEAD1
	CECR2
	DPY19L2
	AMER2
	ZNF207
	ZBTB44
	RPAP2
	WHSC1L1
	COL9A1
	VPS13A
	ESRRG
	MAN1A1
	FBXO21
	PTPRD
	NRP1
	CHIC1
	DDX3Y
	PARD6B
	CYP1B1
	STXBP4
	ZSCAN12
	ZBTB18
	GABRB3
	CHD9
	RASGRP3
	RFX3
	TFEC
	STX7
	AC135983.2
	INO80D
	PROX1
	LTN1
	KIAA2018
	APOL6
	PRRC2C
	MYO6
	HECW1
	RREB1
	MAP3K2
	NHLRC2
	DACH1
	TBC1D9
	TRPC3
	SCML2
	RAB3GAP2
	SRGAP3
	ZFHX4
	ITPR2
	BMP2K
	PTCH1
	KCNA1
	LANCL1
	TRIP12
	SFRP2
	SDAD1
	ZEB2
	IP6K1
	RBPJ
	FLI1
	LMBR1
	TBC1D4
	IGF1
	FBXO32
	EIF3A
	AMOTL1
	CSNK2A1
	CREBRF
	CARF
	RRP1B
	SMAD4
	MMP16
	GLG1
	VWA5A
	UHMK1
	RBMS3
	PRRG3
	CREB5
	SLC25A53
	ADAM22
	SCAI
	ERVV-1
	SCYL2
	KCTD16
	KIF14
	SLC16A6
	SHE
	FAT4
	SLC30A8
	ABCC12
	FMNL2
	BPTF
	BCLAF1
	CNTNAP3B
	PRKAG2
	AMMECR1L
	PAFAH1B2
	HIPK1
	ARAP2
	ERCC6
	NEBL
	GPHN
	ZMYM4
	RPS6KA3
	E2F7
	ADD2
	TYW5
	SUGT1
	LRIG2
	SOX6
	DDHD1
	SUFU
	TRAF6
	ZNHIT6
	NAB1
	ATG14
	DGKI
	SMAD2
	MCM10
	FBXO30
	CDC5L
	ATL3
	ERBB4
	SMC2
	NEGR1
	MED13L
	TAB3
	PLXDC2
	UACA
	PBX1
	PDXK
	NFAT5
	PITPNA
	ZBTB21
	G3BP1
	PRKCA
	SEMA3A
	ATM
	RRAS2
	GPRIN3
	ZNF644
	SORBS1
	NCKAP1
	IRS1
	SF3B1
	SH3GLB1
	AGO3
	LRRFIP2
	SENP6
	CRCP
	ZC3H6
	TTC30A
	HNRNPF
	KIAA1549
	RASAL2
	TPRG1
	RYBP
	EMR2
	RAP1A
	NUCKS1
	TTC28
	NANOS1
	XPO4
	BNC2
	DOCK7
	RNF217
	TRIP11
	ADRBK2
	FGFR1OP
	TNRC6B
	TNPO1
	PDE4DIP
	PHLDA1
	SPAG9
	SCUBE2
	ODF2L
	C4orf32
	AQR
	RFTN2
	CNOT6L
	MXI1
	FOXP1
	SLC16A10
	USP15
	FXR1
	ATP5G3
	DNAJC21
	SESN3
	LPHN3
	IFRD1
	AP3B1
	HNRNPR
	VSTM4
	ARGLU1
	PAPD5
	SKP1
	BAIAP2L1
	XPR1
	OSBPL8
	NUDT21
	HDAC2
	USP9X
	SLC44A1
	SIGLEC7
	NARG2
	C1orf112
	ANKRD26
	AZIN1
	TMEM106B
	VNN3
	EXT1
	POU2F2
	TIMMDC1
	ALG8
	UCHL3
	HMGCS1
	WT1
	LRRC49

## Sheet: S2_TargetScan
Target gene	Representative transcript	Gene name	3P-seq tags + 5	Conserved sites total	Conserved 8mer sites	Conserved 7mer-m8 sites	Conserved 7mer-A1 sites	Poorly conserved sites total	Poorly conserved 8mer sites	Poorly conserved 7mer-m8 sites	Poorly conserved 7mer-A1 sites	6mer sites	Representative miRNA	Cumulative weighted context++ score	Total context++ score
ATP6AP2	ENST00000378438.4	ATPase, H+ transporting, lysosomal accessory protein 2	6001	2	2	0	0	0	0	0	0	0	hsa-miR-148a-3p	-1.26	-1.26
MEOX2	ENST00000262041.5	mesenchyme homeobox 2	5	2	2	0	0	0	0	0	0	0	hsa-miR-148a-3p	-0.97	-0.97
GLRX5	ENST00000331334.4	glutaredoxin 5	6308	1	0	1	0	1	1	0	0	0	hsa-miR-148a-3p	-0.92	-0.92
C5orf30	ENST00000319933.2	chromosome 5 open reading frame 30	889	2	1	1	0	0	0	0	0	0	hsa-miR-152-3p	-0.8	-0.91
SNN	ENST00000329565.5	stannin	663	2	1	1	0	0	0	0	0	3	hsa-miR-148a-3p	-0.79	-0.81
GADD45A	ENST00000370986.4	growth arrest and DNA-damage-inducible, alpha	689	1	1	0	0	0	0	0	0	0	hsa-miR-148a-3p	-0.79	-0.79
ARL8B	ENST00000419534.2	ADP-ribosylation factor-like 8B	664	1	0	1	0	2	0	2	0	0	hsa-miR-148a-3p	-0.77	-0.79
NPTN	ENST00000345330.4	neuroplastin	2918	2	1	1	0	0	0	0	0	0	hsa-miR-148a-3p	-0.76	-0.77
NPEPL1	ENST00000356091.6	aminopeptidase-like 1	134	1	1	0	0	0	0	0	0	0	hsa-miR-148a-3p	-0.75	-0.75
MITF	ENST00000328528.6	microphthalmia-associated transcription factor	593	2	0	1	1	2	0	0	2	1	hsa-miR-148a-3p	-0.74	-0.91
CLCN6	ENST00000312413.6	chloride channel, voltage-sensitive 6	227	1	0	1	0	2	1	0	1	0	hsa-miR-148a-3p	-0.73	-0.73
CDK5R1	ENST00000313401.3	cyclin-dependent kinase 5, regulatory subunit 1 (p35)	335	2	1	1	0	0	0	0	0	0	hsa-miR-148a-3p	-0.73	-0.73
HOMER1	ENST00000508576.1	homer homolog 1 (Drosophila)	394	2	1	1	0	0	0	0	0	0	hsa-miR-148a-3p	-0.7	-0.71
TMEM54	ENST00000373463.3	transmembrane protein 54	35	1	1	0	0	0	0	0	0	0	hsa-miR-152-3p	-0.7	-0.7
SOS2	ENST00000216373.5	son of sevenless homolog 2 (Drosophila)	70	2	1	1	0	0	0	0	0	1	hsa-miR-148a-3p	-0.7	-0.7
HLA-DQB2	ENST00000435145.2	major histocompatibility complex, class II, DQ beta 2	5	2	2	0	0	1	0	1	0	1	hsa-miR-148a-3p	-0.68	-0.68
QKI	ENST00000392127.2	QKI, KH domain containing, RNA binding	323	4	3	0	1	0	0	0	0	1	hsa-miR-148a-3p	-0.67	-1.13
INO80	ENST00000361937.3	INO80 complex subunit	279	2	1	1	0	0	0	0	0	0	hsa-miR-148a-3p	-0.67	-0.67
RTN4	ENST00000394609.2	reticulon 4	34030	1	0	1	0	1	0	1	0	1	hsa-miR-148a-3p	-0.66	-0.66
B4GALT5	ENST00000371711.4	UDP-Gal:betaGlcNAc beta 1,4- galactosyltransferase, polypeptide 5	1000	2	1	1	0	1	0	1	0	1	hsa-miR-148a-3p	-0.66	-0.66
TMED7	ENST00000456936.3	transmembrane emp24 protein transport domain containing 7	1571	2	1	1	0	1	0	0	1	3	hsa-miR-148b-3p	-0.65	-1.05
DCP2	ENST00000389063.2	decapping mRNA 2	155	4	0	3	1	1	0	1	0	0	hsa-miR-148b-3p	-0.65	-0.75
RAB34	ENST00000447716.1	RAB34, member RAS oncogene family	880	1	1	0	0	0	0	0	0	1	hsa-miR-148a-3p	-0.65	-0.65
PRNP	ENST00000379440.4	prion protein	1136	1	1	0	0	1	0	0	1	1	hsa-miR-148a-3p	-0.64	-0.64
SZRD1	ENST00000401089.3	SUZ RNA binding domain containing 1	137	3	0	3	0	1	0	1	0	0	hsa-miR-148a-3p	-0.64	-0.74
USP6	ENST00000332776.4	ubiquitin specific peptidase 6 (Tre-2 oncogene)	5	1	1	0	0	2	0	1	1	0	hsa-miR-148a-3p	-0.63	-0.63
DDX6	ENST00000264018.4	DEAD (Asp-Glu-Ala-Asp) box helicase 6	11	1	0	1	0	1	0	1	0	1	hsa-miR-152-3p	-0.63	-0.75
MMD	ENST00000262065.3	monocyte to macrophage differentiation-associated	558	1	1	0	0	0	0	0	0	0	hsa-miR-148a-3p	-0.63	-0.63
ELF5	ENST00000257832.2	E74-like factor 5 (ets domain transcription factor)	5	2	1	0	1	0	0	0	0	0	hsa-miR-152-3p	-0.61	-0.61
BARHL2	ENST00000370445.4	BarH-like homeobox 2	13	1	1	0	0	0	0	0	0	1	hsa-miR-148a-3p	-0.61	-0.61
OTX2	ENST00000339475.5	orthodenticle homeobox 2	5	1	1	0	0	1	0	0	1	0	hsa-miR-148a-3p	-0.61	-0.61
ZDHHC7	ENST00000313732.4	zinc finger, DHHC-type containing 7	4068	2	2	0	0	0	0	0	0	0	hsa-miR-148a-3p	-0.6	-0.6
PNRC2	ENST00000334351.7	proline-rich nuclear receptor coactivator 2	100	2	0	2	0	0	0	0	0	1	hsa-miR-148b-3p	-0.6	-0.6
CCDC144A	ENST00000443444.2	coiled-coil domain containing 144A	5	1	1	0	0	2	0	0	2	0	hsa-miR-148a-3p	-0.6	-0.6
PIGA	ENST00000542278.1	phosphatidylinositol glycan anchor biosynthesis, class A	104	1	0	1	0	1	1	0	0	0	hsa-miR-152-3p	-0.6	-0.61
MAFB	ENST00000373313.2	v-maf avian musculoaponeurotic fibrosarcoma oncogene homolog B	333	1	1	0	0	2	1	1	0	0	hsa-miR-148a-3p	-0.6	-0.64
ST8SIA3	ENST00000324000.3	ST8 alpha-N-acetyl-neuraminide alpha-2,8-sialyltransferase 3	5	1	0	1	0	2	0	0	2	4	hsa-miR-152-3p	-0.59	-0.59
WDR47	ENST00000400794.3	WD repeat domain 47	185	2	0	2	0	0	0	0	0	0	hsa-miR-152-3p	-0.59	-0.59
TGFA	ENST00000295400.6	transforming growth factor, alpha	36	1	1	0	0	0	0	0	0	1	hsa-miR-148a-3p	-0.58	-0.58
STX3	ENST00000535361.1	syntaxin 3	564	1	1	0	0	0	0	0	0	2	hsa-miR-148a-3p	-0.58	-0.64
RNF219	ENST00000282003.6	ring finger protein 219	680	1	1	0	0	0	0	0	0	1	hsa-miR-152-3p	-0.57	-0.57
WDR20	ENST00000335263.5	WD repeat domain 20	288	1	1	0	0	0	0	0	0	0	hsa-miR-148a-3p	-0.57	-0.57
SNX3	ENST00000230085.8	sorting nexin 3	1843	1	1	0	0	0	0	0	0	0	hsa-miR-148a-3p	-0.57	-0.58
TNRC6A	ENST00000395799.3	trinucleotide repeat containing 6A	267	2	1	0	1	0	0	0	0	0	hsa-miR-148a-3p	-0.56	-0.56
AGO4	ENST00000373210.3	argonaute RISC catalytic component 4	96	1	1	0	0	1	0	1	0	3	hsa-miR-152-3p	-0.56	-0.57
C15orf27	ENST00000388942.3	chromosome 15 open reading frame 27	17	1	1	0	0	0	0	0	0	1	hsa-miR-148a-3p	-0.56	-0.56
UBAP2L	ENST00000343815.6	ubiquitin associated protein 2-like	3367	1	1	0	0	0	0	0	0	0	hsa-miR-148a-3p	-0.56	-0.56
LYSMD2	ENST00000267838.3	LysM, putative peptidoglycan-binding, domain containing 2	307	1	1	0	0	0	0	0	0	0	hsa-miR-148a-3p	-0.55	-0.55
EOGT	ENST00000383701.3	EGF domain-specific O-linked N-acetylglucosamine (GlcNAc) transferase	302	1	1	0	0	0	0	0	0	0	hsa-miR-148a-3p	-0.55	-0.59
ARRDC3	ENST00000265138.3	arrestin domain containing 3	1313	2	0	1	1	0	0	0	0	1	hsa-miR-148a-3p	-0.55	-0.55
CTSA	ENST00000372484.3	cathepsin A	3915	1	1	0	0	0	0	0	0	0	hsa-miR-148a-3p	-0.54	-0.54
USP48	ENST00000400301.1	ubiquitin specific peptidase 48	3036	1	1	0	0	0	0	0	0	0	hsa-miR-148a-3p	-0.54	-0.54
CDC14A	ENST00000370125.2	cell division cycle 14A	123	1	1	0	0	0	0	0	0	1	hsa-miR-148a-3p	-0.54	-0.54
ARFIP1	ENST00000451320.2	ADP-ribosylation factor interacting protein 1	275	1	1	0	0	0	0	0	0	1	hsa-miR-148a-3p	-0.53	-0.53
ZNF274	ENST00000326804.4	zinc finger protein 274	113	1	1	0	0	0	0	0	0	0	hsa-miR-148a-3p	-0.53	-0.53
PPP1R10	ENST00000376511.2	protein phosphatase 1, regulatory subunit 10	893	2	1	1	0	0	0	0	0	0	hsa-miR-148a-3p	-0.53	-0.54
BAI3	ENST00000370598.1	brain-specific angiogenesis inhibitor 3	5	1	1	0	0	0	0	0	0	0	hsa-miR-148a-3p	-0.52	-0.52
ABCB7	ENST00000253577.3	ATP-binding cassette, sub-family B (MDR/TAP), member 7	77	1	1	0	0	0	0	0	0	1	hsa-miR-148a-3p	-0.52	-0.55
MDM4	ENST00000391947.2	Mdm4 p53 binding protein homolog (mouse)	443	1	0	1	0	2	0	2	0	2	hsa-miR-148a-3p	-0.52	-0.58
SPRYD7	ENST00000361840.3	SPRY domain containing 7	863	1	0	1	0	0	0	0	0	0	hsa-miR-148a-3p	-0.52	-0.52
PPP6R1	ENST00000412770.2	protein phosphatase 6, regulatory subunit 1	292	1	1	0	0	0	0	0	0	0	hsa-miR-148a-3p	-0.51	-0.51
CCDC6	ENST00000263102.6	coiled-coil domain containing 6	193	1	1	0	0	0	0	0	0	0	hsa-miR-148a-3p	-0.51	-0.51
SNX27	ENST00000368843.3	sorting nexin family member 27	46	1	0	1	0	1	0	0	1	0	hsa-miR-148a-3p	-0.51	-0.51
SOS1	ENST00000426016.1	son of sevenless homolog 1 (Drosophila)	189	1	1	0	0	1	0	0	1	1	hsa-miR-148b-3p	-0.51	-0.51
SMIM12	ENST00000521580.2	small integral membrane protein 12	1091	1	0	1	0	2	1	1	0	0	hsa-miR-148a-3p	-0.5	-0.7
C7orf60	ENST00000297145.4	chromosome 7 open reading frame 60	39	1	1	0	0	1	0	0	1	0	hsa-miR-148a-3p	-0.5	-0.62
NRAS	ENST00000369535.4	neuroblastoma RAS viral (v-ras) oncogene homolog	551	1	1	0	0	0	0	0	0	0	hsa-miR-148a-3p	-0.5	-0.5
FBXO28	ENST00000424254.2	F-box protein 28	461	2	0	2	0	0	0	0	0	0	hsa-miR-152-3p	-0.5	-0.56
NR2C2AP	ENST00000331552.7	nuclear receptor 2C2-associated protein	8	1	1	0	0	0	0	0	0	0	hsa-miR-148a-3p	-0.49	-0.49
SESTD1	ENST00000428443.3	SEC14 and spectrin domains 1	478	1	1	0	0	0	0	0	0	1	hsa-miR-148a-3p	-0.49	-0.5
FEZ2	ENST00000379245.4	fasciculation and elongation protein zeta 2 (zygin II)	323	1	1	0	0	0	0	0	0	0	hsa-miR-148a-3p	-0.49	-0.54
NPTX1	ENST00000306773.4	neuronal pentraxin I	1876	1	1	0	0	2	0	2	0	1	hsa-miR-148a-3p	-0.49	-0.51
NCKIPSD	ENST00000416649.2	NCK interacting protein with SH3 domain	4158	1	1	0	0	2	1	0	1	1	hsa-miR-148b-3p	-0.49	-0.54
DDAH1	ENST00000535924.2	dimethylarginine dimethylaminohydrolase 1	46	1	1	0	0	1	0	0	1	0	hsa-miR-148a-3p	-0.49	-0.49
CDK19	ENST00000368911.3	cyclin-dependent kinase 19	51	2	1	1	0	1	0	1	0	0	hsa-miR-148a-3p	-0.49	-0.87
ELAVL4	ENST00000371824.1	ELAV like neuron-specific RNA binding protein 4	5	2	1	1	0	0	0	0	0	0	hsa-miR-148a-3p	-0.48	-0.48
KLF6	ENST00000542957.1	Kruppel-like factor 6	4644	2	0	2	0	0	0	0	0	0	hsa-miR-148a-3p	-0.48	-0.48
ERRFI1	ENST00000377482.5	ERBB receptor feedback inhibitor 1	3807	1	1	0	0	0	0	0	0	0	hsa-miR-148a-3p	-0.48	-0.53
FXR1	ENST00000357559.4	fragile X mental retardation, autosomal homolog 1	434	1	1	0	0	1	1	0	0	0	hsa-miR-148a-3p	-0.48	-0.67
SMS	ENST00000404933.2	spermine synthase	14	1	1	0	0	0	0	0	0	0	hsa-miR-148a-3p	-0.48	-0.48
BICC1	ENST00000373886.3	bicaudal C homolog 1 (Drosophila)	165	1	1	0	0	0	0	0	0	1	hsa-miR-148a-3p	-0.48	-0.48
EIF4E3	ENST00000425534.3	eukaryotic translation initiation factor 4E family member 3	475	1	1	0	0	0	0	0	0	0	hsa-miR-148b-3p	-0.48	-0.48
MARCH3	ENST00000308660.5	membrane-associated ring finger (C3HC4) 3, E3 ubiquitin protein ligase	77	2	1	1	0	0	0	0	0	0	hsa-miR-152-3p	-0.48	-0.48
MTF1	ENST00000373036.4	metal-regulatory transcription factor 1	98	3	1	2	0	0	0	0	0	0	hsa-miR-148a-3p	-0.48	-0.48
KLF5	ENST00000377687.4	Kruppel-like factor 5 (intestinal)	161	1	1	0	0	0	0	0	0	0	hsa-miR-148a-3p	-0.47	-0.47
C3orf58	ENST00000441925.2	chromosome 3 open reading frame 58	118	1	1	0	0	0	0	0	0	1	hsa-miR-148a-3p	-0.47	-0.47
UCP3	ENST00000314032.4	uncoupling protein 3 (mitochondrial, proton carrier)	10	1	1	0	0	0	0	0	0	0	hsa-miR-148a-3p	-0.47	-0.47
MTMR14	ENST00000353332.5	myotubularin related protein 14	173	1	1	0	0	0	0	0	0	0	hsa-miR-148a-3p	-0.47	-0.47
KCNJ6	ENST00000609713.1	potassium inwardly-rectifying channel, subfamily J, member 6	5	1	0	1	0	5	0	4	1	2	hsa-miR-148a-3p	-0.47	-0.47
LRP2	ENST00000263816.3	low density lipoprotein receptor-related protein 2	56	1	1	0	0	0	0	0	0	0	hsa-miR-148a-3p	-0.47	-0.47
SNAP91	ENST00000521485.1	synaptosomal-associated protein, 91kDa	68	1	1	0	0	0	0	0	0	1	hsa-miR-148a-3p	-0.46	-0.46
CAND1	ENST00000545606.1	cullin-associated and neddylation-dissociated 1	1568	1	1	0	0	1	0	0	1	0	hsa-miR-148a-3p	-0.46	-0.63
NRP1	ENST00000374875.1	neuropilin 1	586	1	1	0	0	1	0	1	0	2	hsa-miR-148a-3p	-0.46	-0.64
TMEM170A	ENST00000357613.4	transmembrane protein 170A	70	1	1	0	0	0	0	0	0	0	hsa-miR-148a-3p	-0.46	-0.46
USP33	ENST00000370794.3	ubiquitin specific peptidase 33	287	1	0	1	0	1	0	1	0	0	hsa-miR-148a-3p	-0.46	-0.46
C7orf71	ENST00000409974.3	chromosome 7 open reading frame 71	5	1	1	0	0	0	0	0	0	0	hsa-miR-148a-3p	-0.46	-0.46
ADAMTS5	ENST00000284987.5	ADAM metallopeptidase with thrombospondin type 1 motif, 5	68	2	0	1	1	1	0	0	1	1	hsa-miR-148a-3p	-0.46	-0.48
PLAA	ENST00000397292.3	phospholipase A2-activating protein	416	1	0	1	0	2	0	1	1	1	hsa-miR-148a-3p	-0.45	-0.56
SRSF11	ENST00000370950.3	serine/arginine-rich splicing factor 11	1201	1	1	0	0	1	0	1	0	0	hsa-miR-148a-3p	-0.45	-0.51
MAP3K9	ENST00000554752.2	mitogen-activated protein kinase kinase kinase 9	44	1	1	0	0	1	0	0	1	1	hsa-miR-148a-3p	-0.45	-0.47
RGMA	ENST00000557420.1	RGM domain family, member A	145	1	1	0	0	0	0	0	0	0	hsa-miR-148a-3p	-0.45	-0.47
TMSB4X	ENST00000451311.2	thymosin beta 4, X-linked	5	1	0	1	0	0	0	0	0	0	hsa-miR-148a-3p	-0.45	-0.45
AC135178.1	ENST00000535173.1	HCG1985372; Uncharacterized protein; cDNA FLJ37541 fis, clone BRCAN2026340	13	1	1	0	0	2	1	0	1	0	hsa-miR-148a-3p	-0.45	-1.17
ROBO1	ENST00000436010.2	roundabout, axon guidance receptor, homolog 1 (Drosophila)	546	2	0	2	0	0	0	0	0	0	hsa-miR-148a-3p	-0.45	-0.45
CYB5R4	ENST00000369681.5	cytochrome b5 reductase 4	329	1	0	1	0	0	0	0	0	0	hsa-miR-148a-3p	-0.45	-0.45
LIPA	ENST00000336233.5	lipase A, lysosomal acid, cholesterol esterase	1793	1	1	0	0	0	0	0	0	0	hsa-miR-148a-3p	-0.44	-0.47
KIAA0232	ENST00000425103.1	KIAA0232	119	2	1	0	1	0	0	0	0	1	hsa-miR-148a-3p	-0.44	-0.52
XPO4	ENST00000400602.2	exportin 4	718	1	1	0	0	2	0	1	1	1	hsa-miR-148a-3p	-0.44	-0.53
RPS6KA5	ENST00000261991.3	ribosomal protein S6 kinase, 90kDa, polypeptide 5	64	2	0	2	0	2	0	2	0	1	hsa-miR-148b-3p	-0.43	-0.8
ABCD3	ENST00000394233.2	ATP-binding cassette, sub-family D (ALD), member 3	53	1	1	0	0	0	0	0	0	1	hsa-miR-148a-3p	-0.43	-0.43
POU3F2	ENST00000328345.5	POU class 3 homeobox 2	274	1	0	1	0	1	0	0	1	0	hsa-miR-152-3p	-0.43	-0.43
PBXIP1	ENST00000368465.1	pre-B-cell leukemia homeobox interacting protein 1	1080	1	1	0	0	0	0	0	0	1	hsa-miR-148a-3p	-0.43	-0.44
SKP1	ENST00000353411.6	S-phase kinase-associated protein 1	416	1	0	1	0	0	0	0	0	0	hsa-miR-148a-3p	-0.43	-0.43
BHLHE41	ENST00000242728.4	basic helix-loop-helix family, member e41	50	1	1	0	0	0	0	0	0	1	hsa-miR-148a-3p	-0.43	-0.48
NEURL4	ENST00000315614.7	neuralized homolog 4 (Drosophila)	469	1	1	0	0	0	0	0	0	0	hsa-miR-148a-3p	-0.43	-0.43
PTEN	ENST00000371953.3	phosphatase and tensin homolog	118	2	1	1	0	0	0	0	0	0	hsa-miR-148a-3p	-0.43	-0.61
MIER1	ENST00000357692.2	mesoderm induction early response 1, transcriptional regulator	950	2	1	1	0	0	0	0	0	0	hsa-miR-148a-3p	-0.43	-0.63
UGT8	ENST00000310836.6	UDP glycosyltransferase 8	682	1	0	0	1	1	0	0	1	0	hsa-miR-148a-3p	-0.42	-0.47
FAM168B	ENST00000409185.1	family with sequence similarity 168, member B	122	1	0	1	0	1	0	0	1	1	hsa-miR-148a-3p	-0.42	-0.56
YPEL3	ENST00000566134.1	yippee-like 3 (Drosophila)	330	1	0	1	0	0	0	0	0	0	hsa-miR-148a-3p	-0.42	-0.42
SLC25A44	ENST00000359511.4	solute carrier family 25, member 44	760	1	0	1	0	2	0	1	1	0	hsa-miR-148a-3p	-0.42	-0.42
CUL5	ENST00000393094.2	cullin 5	761	1	1	0	0	0	0	0	0	1	hsa-miR-148a-3p	-0.42	-0.42
DNMT1	ENST00000340748.4	DNA (cytosine-5-)-methyltransferase 1	47	1	1	0	0	0	0	0	0	0	hsa-miR-148a-3p	-0.42	-0.42
B4GALT6	ENST00000306851.5	UDP-Gal:betaGlcNAc beta 1,4- galactosyltransferase, polypeptide 6	146	1	1	0	0	1	1	0	0	0	hsa-miR-148a-3p	-0.42	-0.69
ABL2	ENST00000502732.1	c-abl oncogene 2, non-receptor tyrosine kinase	892	1	0	1	0	1	0	0	1	4	hsa-miR-148a-3p	-0.42	-0.44
AGFG1	ENST00000310078.8	ArfGAP with FG repeats 1	2019	1	0	1	0	1	0	0	1	0	hsa-miR-148a-3p	-0.42	-0.43
CDH7	ENST00000397968.2	cadherin 7, type 2	42	1	1	0	0	0	0	0	0	0	hsa-miR-148a-3p	-0.42	-0.42
H2AFY	ENST00000511689.1	H2A histone family, member Y	2126	1	0	0	1	0	0	0	0	1	hsa-miR-148a-3p	-0.42	-0.42
SLC2A1	ENST00000426263.3	solute carrier family 2 (facilitated glucose transporter), member 1	13928	1	1	0	0	0	0	0	0	1	hsa-miR-148a-3p	-0.42	-0.42
ROCK1	ENST00000399799.2	Rho-associated, coiled-coil containing protein kinase 1	7	2	0	1	1	0	0	0	0	1	hsa-miR-148a-3p	-0.41	-0.41
JMY	ENST00000396137.4	junction mediating and regulatory protein, p53 cofactor	10	1	1	0	0	1	1	0	0	0	hsa-miR-148a-3p	-0.41	-0.41
SGMS1	ENST00000361781.2	sphingomyelin synthase 1	100	1	0	1	0	0	0	0	0	1	hsa-miR-148a-3p	-0.41	-0.41
GPATCH8	ENST00000591680.1	G patch domain containing 8	337	1	1	0	0	0	0	0	0	2	hsa-miR-148a-3p	-0.41	-0.44
AHDC1	ENST00000247087.5	AT hook, DNA binding motif, containing 1	174	1	1	0	0	0	0	0	0	0	hsa-miR-148a-3p	-0.41	-0.41
LDLR	ENST00000558518.1	low density lipoprotein receptor	1462	1	0	1	0	1	1	0	0	0	hsa-miR-148a-3p	-0.41	-0.55
CHST1	ENST00000308064.2	carbohydrate (keratan sulfate Gal-6) sulfotransferase 1	5	1	0	1	0	0	0	0	0	0	hsa-miR-148a-3p	-0.41	-0.41
CNTN4	ENST00000427331.1	contactin 4	191	1	1	0	0	0	0	0	0	0	hsa-miR-148a-3p	-0.41	-0.41
MAF	ENST00000393350.1	v-maf avian musculoaponeurotic fibrosarcoma oncogene homolog	608	1	1	0	0	0	0	0	0	1	hsa-miR-148a-3p	-0.41	-0.41
NDP	ENST00000378062.5	Norrie disease (pseudoglioma)	5	1	1	0	0	0	0	0	0	0	hsa-miR-148a-3p	-0.4	-0.4
DOCK6	ENST00000294618.7	dedicator of cytokinesis 6	171	1	1	0	0	0	0	0	0	0	hsa-miR-148b-3p	-0.4	-0.4
TNRC6C	ENST00000335749.4	trinucleotide repeat containing 6C	248	2	1	0	1	0	0	0	0	0	hsa-miR-148a-3p	-0.4	-0.42
MDFIC	ENST00000393486.1	MyoD family inhibitor domain containing	601	1	0	1	0	0	0	0	0	0	hsa-miR-148a-3p	-0.4	-0.41
ATP2B4	ENST00000367218.3	ATPase, Ca++ transporting, plasma membrane 4	7311	1	1	0	0	0	0	0	0	1	hsa-miR-148a-3p	-0.4	-0.41
DYNLL2	ENST00000579991.2	dynein, light chain, LC8-type 2	1162	1	0	1	0	2	0	2	0	4	hsa-miR-148a-3p	-0.4	-0.57
TRAK2	ENST00000332624.3	trafficking protein, kinesin binding 2	353	1	1	0	0	0	0	0	0	0	hsa-miR-148a-3p	-0.4	-0.4
UBE2D1	ENST00000373910.4	ubiquitin-conjugating enzyme E2D 1	200	1	0	1	0	0	0	0	0	1	hsa-miR-148a-3p	-0.4	-0.41
NOG	ENST00000332822.4	noggin	107	1	0	1	0	0	0	0	0	0	hsa-miR-148a-3p	-0.4	-0.4
OSBPL11	ENST00000296220.5	oxysterol binding protein-like 11	101	2	2	0	0	0	0	0	0	0	hsa-miR-152-3p	-0.4	-0.72
ITGA11	ENST00000423218.2	integrin, alpha 11	390	1	1	0	0	1	0	0	1	0	hsa-miR-148a-3p	-0.4	-0.46
CPT1A	ENST00000265641.5	carnitine palmitoyltransferase 1A (liver)	869	1	1	0	0	1	0	1	0	0	hsa-miR-148a-3p	-0.4	-0.42
PRR15	ENST00000319694.2	proline rich 15	244	1	0	1	0	0	0	0	0	0	hsa-miR-148a-3p	-0.4	-0.44
LAMA4	ENST00000230538.7	laminin, alpha 4	605	1	0	0	1	0	0	0	0	0	hsa-miR-148a-3p	-0.4	-0.4
RNF38	ENST00000259605.6	ring finger protein 38	348	1	0	1	0	0	0	0	0	0	hsa-miR-148a-3p	-0.4	-0.4
TEK	ENST00000380036.4	TEK tyrosine kinase, endothelial	1007	1	1	0	0	0	0	0	0	0	hsa-miR-148a-3p	-0.4	-0.4
ACVR1	ENST00000263640.3	activin A receptor, type I	1523	1	0	1	0	0	0	0	0	0	hsa-miR-148a-3p	-0.4	-0.4
ATP7A	ENST00000343533.5	ATPase, Cu++ transporting, alpha polypeptide	141	1	1	0	0	0	0	0	0	2	hsa-miR-152-3p	-0.39	-0.4
MAF1	ENST00000322428.5	MAF1 homolog (S. cerevisiae)	698	1	1	0	0	0	0	0	0	1	hsa-miR-148a-3p	-0.39	-0.39
LRRC41	ENST00000343304.6	leucine rich repeat containing 41	1532	1	1	0	0	0	0	0	0	0	hsa-miR-148a-3p	-0.39	-0.39
LBR	ENST00000272163.4	lamin B receptor	1217	1	1	0	0	0	0	0	0	0	hsa-miR-148a-3p	-0.39	-0.39
ASPH	ENST00000356457.5	aspartate beta-hydroxylase	3013	1	1	0	0	0	0	0	0	0	hsa-miR-148a-3p	-0.39	-0.39
SIK1	ENST00000270162.6	salt-inducible kinase 1	2163	1	1	0	0	0	0	0	0	1	hsa-miR-148a-3p	-0.39	-0.39
MAP3K4	ENST00000366919.2	mitogen-activated protein kinase kinase kinase 4	241	1	1	0	0	0	0	0	0	0	hsa-miR-148a-3p	-0.39	-0.39
ESR1	ENST00000440973.1	estrogen receptor 1	5	1	0	1	0	0	0	0	0	1	hsa-miR-148a-3p	-0.39	-0.39
FMR1	ENST00000370471.3	fragile X mental retardation 1	1155	1	1	0	0	0	0	0	0	0	hsa-miR-148a-3p	-0.39	-0.39
COL2A1	ENST00000380518.3	collagen, type II, alpha 1	1518	1	1	0	0	0	0	0	0	0	hsa-miR-148a-3p	-0.39	-0.39
UNC79	ENST00000553484.1	unc-79 homolog (C. elegans)	5	1	1	0	0	0	0	0	0	0	hsa-miR-148a-3p	-0.38	-0.38
AKAP1	ENST00000337714.3	A kinase (PRKA) anchor protein 1	843	1	0	1	0	0	0	0	0	1	hsa-miR-148a-3p	-0.38	-0.41
CSF1	ENST00000329608.6	colony stimulating factor 1 (macrophage)	290	2	1	1	0	1	1	0	0	2	hsa-miR-152-3p	-0.38	-0.38
ESRRG	ENST00000361525.3	estrogen-related receptor gamma	5	1	1	0	0	0	0	0	0	1	hsa-miR-148a-3p	-0.38	-0.38
UHMK1	ENST00000538489.1	U2AF homology motif (UHM) kinase 1	48	2	0	1	1	1	0	0	1	3	hsa-miR-148a-3p	-0.37	-0.72
STX6	ENST00000258301.5	syntaxin 6	348	1	1	0	0	0	0	0	0	0	hsa-miR-148a-3p	-0.37	-0.37
PHACTR2	ENST00000427704.2	phosphatase and actin regulator 2	274	1	0	1	0	1	0	0	1	2	hsa-miR-148a-3p	-0.37	-0.38
MED12L	ENST00000474524.1	mediator complex subunit 12-like	30	1	1	0	0	1	1	0	0	0	hsa-miR-148a-3p	-0.37	-0.39
JHDM1D	ENST00000397560.2	jumonji C domain containing histone demethylase 1 homolog D (S. cerevisiae)	470	1	0	0	1	1	0	0	1	0	hsa-miR-148a-3p	-0.37	-0.42
TFRC	ENST00000540528.1	transferrin receptor	296	1	0	0	1	1	0	0	1	0	hsa-miR-152-3p	-0.37	-0.39
RSBN1L	ENST00000334955.8	round spermatid basic protein 1-like	640	1	0	1	0	0	0	0	0	1	hsa-miR-148b-3p	-0.37	-0.38
ITGA5	ENST00000293379.4	integrin, alpha 5 (fibronectin receptor, alpha polypeptide)	5599	2	1	1	0	0	0	0	0	0	hsa-miR-148a-3p	-0.37	-0.37
RAB24	ENST00000393611.2	RAB24, member RAS oncogene family	908	1	0	1	0	0	0	0	0	0	hsa-miR-148a-3p	-0.37	-0.37
FAM184A	ENST00000338891.7	family with sequence similarity 184, member A	167	1	0	1	0	0	0	0	0	0	hsa-miR-148a-3p	-0.37	-0.37
NFYA	ENST00000341376.6	nuclear transcription factor Y, alpha	177	1	0	1	0	3	0	0	3	1	hsa-miR-148a-3p	-0.37	-0.7
SIRT7	ENST00000328666.6	sirtuin 7	8	2	0	2	0	0	0	0	0	0	hsa-miR-148a-3p	-0.37	-0.48
HLA-DQB1	ENST00000399082.3	major histocompatibility complex, class II, DQ beta 1	40	1	1	0	0	0	0	0	0	0	hsa-miR-148a-3p	-0.37	-0.37
DMPK	ENST00000354227.5	dystrophia myotonica-protein kinase	409	1	1	0	0	0	0	0	0	0	hsa-miR-148a-3p	-0.37	-0.38
CCDC71	ENST00000321895.6	coiled-coil domain containing 71	64	1	0	1	0	0	0	0	0	0	hsa-miR-148a-3p	-0.37	-0.37
UBE2W	ENST00000517608.1	ubiquitin-conjugating enzyme E2W (putative)	102	1	0	1	0	0	0	0	0	0	hsa-miR-148a-3p	-0.37	-0.37
ST18	ENST00000276480.7	suppression of tumorigenicity 18 (breast carcinoma) (zinc finger protein)	5	1	1	0	0	0	0	0	0	0	hsa-miR-148a-3p	-0.37	-0.37
SBF2	ENST00000256190.8	SET binding factor 2	65	1	1	0	0	1*	0	0	0	0	hsa-miR-148a-3p	-0.37	-0.37
PNPLA2	ENST00000336615.4	patatin-like phospholipase domain containing 2	6586	1	1	0	0	0	0	0	0	0	hsa-miR-148a-3p	-0.37	-0.37
UBXN1	ENST00000294119.2	UBX domain protein 1	48	1	0	0	1	0	0	0	0	0	hsa-miR-148a-3p	-0.37	-0.37
KCND3	ENST00000369697.1	potassium voltage-gated channel, Shal-related subfamily, member 3	23	2	0	0	2	1	0	1	0	0	hsa-miR-148a-3p	-0.36	-0.36
RORB	ENST00000376896.3	RAR-related orphan receptor B	5	1	0	1	0	2	0	2	0	1	hsa-miR-148a-3p	-0.36	-0.36
FBXL19	ENST00000338343.4	F-box and leucine-rich repeat protein 19	75	1	1	0	0	0	0	0	0	0	hsa-miR-148a-3p	-0.36	-0.36
SECISBP2L	ENST00000559471.1	SECIS binding protein 2-like	161	1	0	1	0	0	0	0	0	0	hsa-miR-148a-3p	-0.36	-0.36
ZDHHC17	ENST00000426126.2	zinc finger, DHHC-type containing 17	117	1	1	0	0	1	0	0	1	0	hsa-miR-148b-3p	-0.36	-0.56
C2orf91	ENST00000378711.2	chromosome 2 open reading frame 91	5	1	0	1	0	1	1	0	0	1	hsa-miR-148a-3p	-0.36	-0.36
KIAA1468	ENST00000398130.2	KIAA1468	756	1	0	1	0	0	0	0	0	0	hsa-miR-148a-3p	-0.36	-0.36
NOVA1	ENST00000465357.2	neuro-oncological ventral antigen 1	5	1	0	0	1	0	0	0	0	2	hsa-miR-148a-3p	-0.36	-0.36
SLC13A2	ENST00000314669.5	solute carrier family 13 (sodium-dependent dicarboxylate transporter), member 2	5	1	0	1	0	0	0	0	0	0	hsa-miR-148a-3p	-0.36	-0.36
WASL	ENST00000223023.4	Wiskott-Aldrich syndrome-like	230	1	0	1	0	1	0	1	0	0	hsa-miR-148a-3p	-0.36	-0.37
TBC1D5	ENST00000253692.7	TBC1 domain family, member 5	400	1	1	0	0	0	0	0	0	1	hsa-miR-148a-3p	-0.36	-0.38
WNT10B	ENST00000407467.1	wingless-type MMTV integration site family, member 10B	13	1	0	1	0	0	0	0	0	1	hsa-miR-152-3p	-0.36	-0.36
ZBTB18	ENST00000358704.4	zinc finger and BTB domain containing 18	935	1	0	1	0	0	0	0	0	0	hsa-miR-148a-3p	-0.36	-0.36
ORMDL1	ENST00000392350.3	ORM1-like 1 (S. cerevisiae)	998	1	0	1	0	0	0	0	0	0	hsa-miR-148a-3p	-0.36	-0.36
MNT	ENST00000174618.4	MNT, MAX dimerization protein	146	1	1	0	0	0	0	0	0	1	hsa-miR-148a-3p	-0.36	-0.44
PDE4D	ENST00000340635.6	phosphodiesterase 4D, cAMP-specific	747	2	1	1	0	0	0	0	0	1	hsa-miR-148a-3p	-0.35	-0.38
ADAM17	ENST00000310823.3	ADAM metallopeptidase domain 17	96	1	0	0	1	1	0	0	1	0	hsa-miR-148a-3p	-0.35	-0.51
PRKAA1	ENST00000397128.2	protein kinase, AMP-activated, alpha 1 catalytic subunit	1415	1	1	0	0	0	0	0	0	1	hsa-miR-148a-3p	-0.35	-0.42
GPR116	ENST00000283296.7	G protein-coupled receptor 116	5	1	1	0	0	0	0	0	0	0	hsa-miR-148a-3p	-0.35	-0.35
AGO1	ENST00000373204.4	argonaute RISC catalytic component 1	402	2	1	1	0	4	2	1	1	4	hsa-miR-148a-3p	-0.35	-0.42
FAM43A	ENST00000329759.4	family with sequence similarity 43, member A	287	1	0	1	0	0	0	0	0	1	hsa-miR-148a-3p	-0.35	-0.42
DMRTA2	ENST00000418121.1	DMRT-like family A2	9	1	0	0	1	1	0	0	1	0	hsa-miR-148a-3p	-0.35	-0.36
STX11	ENST00000367568.4	syntaxin 11	13	1	0	0	1	0	0	0	0	1	hsa-miR-148a-3p	-0.35	-0.38
RBM24	ENST00000379052.5	RNA binding motif protein 24	43	2	0	1	1	0	0	0	0	0	hsa-miR-148a-3p	-0.35	-0.6
ITPK1	ENST00000267615.6	inositol-tetrakisphosphate 1-kinase	60	1	0	1	0	1	0	0	1	3	hsa-miR-152-3p	-0.35	-0.35
NR2E1	ENST00000368986.4	nuclear receptor subfamily 2, group E, member 1	5	1	0	0	1	1	1	0	0	0	hsa-miR-148a-3p	-0.35	-0.35
DSTYK	ENST00000367160.4	dual serine/threonine and tyrosine protein kinase	256	1	1	0	0	0	0	0	0	2	hsa-miR-148a-3p	-0.35	-0.38
NAP1L1	ENST00000261182.8	nucleosome assembly protein 1-like 1	9072	1	0	1	0	1	0	1	0	0	hsa-miR-148a-3p	-0.35	-0.55
RAB12	ENST00000329286.6	RAB12, member RAS oncogene family	589	1	0	1	0	0	0	0	0	0	hsa-miR-148a-3p	-0.35	-0.35
FBN1	ENST00000316623.5	fibrillin 1	798	1	0	1	0	0	0	0	0	0	hsa-miR-148a-3p	-0.35	-0.35
MTMR1	ENST00000445323.2	myotubularin related protein 1	489	1	0	1	0	0	0	0	0	1	hsa-miR-148a-3p	-0.34	-0.34
SSR1	ENST00000244763.4	signal sequence receptor, alpha	12917	1	0	1	0	0	0	0	0	2	hsa-miR-148a-3p	-0.34	-0.39
MAFG	ENST00000357736.4	v-maf avian musculoaponeurotic fibrosarcoma oncogene homolog G	5	1	1	0	0	0	0	0	0	2	hsa-miR-152-3p	-0.34	-0.34
MPPED2	ENST00000358117.5	metallophosphoesterase domain containing 2	42	1	0	1	0	0	0	0	0	0	hsa-miR-148a-3p	-0.34	-0.34
ESCO1	ENST00000269214.5	establishment of sister chromatid cohesion N-acetyltransferase 1	94	1	1	0	0	0	0	0	0	0	hsa-miR-148a-3p	-0.34	-0.34
ITSN2	ENST00000361999.3	intersectin 2	63	1	1	0	0	0	0	0	0	0	hsa-miR-148a-3p	-0.34	-0.34
OTUD4	ENST00000454497.2	OTU domain containing 4	18	1	1	0	0	0	0	0	0	1	hsa-miR-148a-3p	-0.34	-0.34
SLC16A6	ENST00000327268.4	solute carrier family 16, member 6	17	1	1	0	0	0	0	0	0	0	hsa-miR-148a-3p	-0.34	-0.34
EPN2	ENST00000314728.5	epsin 2	1609	1	1	0	0	1	0	0	1	0	hsa-miR-148a-3p	-0.34	-0.37
PTGES3	ENST00000262033.6	prostaglandin E synthase 3 (cytosolic)	93	1	0	1	0	0	0	0	0	0	hsa-miR-148a-3p	-0.34	-0.34
MLLT10	ENST00000377072.3	myeloid/lymphoid or mixed-lineage leukemia (trithorax homolog, Drosophila); translocated to, 10	495	1	1	0	0	0	0	0	0	2	hsa-miR-148a-3p	-0.33	-0.39
ADCY2	ENST00000338316.4	adenylate cyclase 2 (brain)	13	1	0	1	0	0	0	0	0	1	hsa-miR-148a-3p	-0.33	-0.33
RASAL1	ENST00000546530.1	RAS protein activator like 1 (GAP1 like)	12	1	1	0	0	0	0	0	0	0	hsa-miR-148a-3p	-0.33	-0.33
CEP63	ENST00000337090.3	centrosomal protein 63kDa	191	1	0	1	0	1	0	1	0	0	hsa-miR-148a-3p	-0.33	-0.44
SOGA2	ENST00000359865.3	SOGA family member 2	47	1	0	1	0	0	0	0	0	0	hsa-miR-148a-3p	-0.33	-0.33
F3	ENST00000334047.7	coagulation factor III (thromboplastin, tissue factor)	13568	1	0	1	0	0	0	0	0	1	hsa-miR-148a-3p	-0.33	-0.37
DNAJB4	ENST00000370763.5	DnaJ (Hsp40) homolog, subfamily B, member 4	633	1	0	0	1	0	0	0	0	1	hsa-miR-148a-3p	-0.33	-0.34
NEUROD1	ENST00000295108.3	neuronal differentiation 1	5	1	0	1	0	0	0	0	0	0	hsa-miR-148a-3p	-0.33	-0.33
PPP1CB	ENST00000395366.2	protein phosphatase 1, catalytic subunit, beta isozyme	5795	1	0	1	0	0	0	0	0	0	hsa-miR-148b-3p	-0.33	-0.33
RC3H1	ENST00000367696.2	ring finger and CCCH-type domains 1	165	2	1	0	1	1	0	0	1	1	hsa-miR-148a-3p	-0.33	-0.37
EMX2	ENST00000442245.4	empty spiracles homeobox 2	54	1	0	0	1	0	0	0	0	0	hsa-miR-152-3p	-0.33	-0.37
PDE7A	ENST00000401827.3	phosphodiesterase 7A	84	1	0	1	0	0	0	0	0	0	hsa-miR-148a-3p	-0.33	-0.33
ITFG3	ENST00000399932.3	integrin alpha FG-GAP repeat containing 3	1046	1	0	1	0	1	1	0	0	0	hsa-miR-148a-3p	-0.33	-0.33
ZNF821	ENST00000564134.1	zinc finger protein 821	56	1	1	0	0	0	0	0	0	0	hsa-miR-148a-3p	-0.33	-0.33
RICTOR	ENST00000357387.3	RPTOR independent companion of MTOR, complex 2	441	2	0	1	1	0	0	0	0	1	hsa-miR-152-3p	-0.33	-0.33
PHF20	ENST00000439301.1	PHD finger protein 20	191	1	0	1	0	1	1	0	0	1	hsa-miR-148a-3p	-0.33	-0.51
KLF4	ENST00000374672.4	Kruppel-like factor 4 (gut)	22	1	0	1	0	0	0	0	0	0	hsa-miR-148a-3p	-0.33	-0.33
ADAM10	ENST00000260408.3	ADAM metallopeptidase domain 10	385	1	1	0	0	0	0	0	0	0	hsa-miR-148a-3p	-0.32	-0.36
LMAN1	ENST00000251047.5	lectin, mannose-binding, 1	2293	1	1	0	0	0	0	0	0	0	hsa-miR-148a-3p	-0.32	-0.38
NRARP	ENST00000356628.2	NOTCH-regulated ankyrin repeat protein	56	1	1	0	0	0	0	0	0	0	hsa-miR-148a-3p	-0.32	-0.52
C6orf62	ENST00000378119.4	chromosome 6 open reading frame 62	300	1	0	1	0	0	0	0	0	1	hsa-miR-148a-3p	-0.32	-0.36
PPFIA2	ENST00000549396.1	protein tyrosine phosphatase, receptor type, f polypeptide (PTPRF), interacting protein (liprin), alpha 2	5	1	0	0	1	0	0	0	0	1	hsa-miR-148a-3p	-0.32	-0.32
TNFRSF1B	ENST00000376259.3	tumor necrosis factor receptor superfamily, member 1B	243	1	0	1	0	0	0	0	0	0	hsa-miR-148a-3p	-0.32	-0.32
LRCH1	ENST00000311191.6	leucine-rich repeats and calponin homology (CH) domain containing 1	381	1	0	1	0	0	0	0	0	0	hsa-miR-148a-3p	-0.32	-0.32
EYA3	ENST00000373871.3	eyes absent homolog 3 (Drosophila)	50	1	1	0	0	0	0	0	0	2	hsa-miR-148b-3p	-0.32	-0.32
DUSP1	ENST00000239223.3	dual specificity phosphatase 1	37211	1	0	0	1	0	0	0	0	0	hsa-miR-148a-3p	-0.32	-0.32
DENND4C	ENST00000380432.2	DENN/MADD domain containing 4C	195	1	0	1	0	1	0	1	0	0	hsa-miR-148a-3p	-0.32	-0.44
SGCB	ENST00000381431.5	sarcoglycan, beta (43kDa dystrophin-associated glycoprotein)	1795	1	1	0	0	2	1	1	0	2	hsa-miR-148a-3p	-0.32	-0.56
UBA6	ENST00000322244.5	ubiquitin-like modifier activating enzyme 6	169	1	1	0	0	0	0	0	0	0	hsa-miR-148a-3p	-0.32	-0.32
ATP8A1	ENST00000381668.5	ATPase, aminophospholipid transporter (APLT), class I, type 8A, member 1	48	1	0	1	0	1	0	1	0	1	hsa-miR-148a-3p	-0.32	-0.34
EPS15	ENST00000371730.2	epidermal growth factor receptor pathway substrate 15	325	1	0	1	0	1	0	1	0	0	hsa-miR-148a-3p	-0.32	-0.55
EDNRA	ENST00000339690.5	endothelin receptor type A	35	1	0	1	0	1	0	1	0	0	hsa-miR-148a-3p	-0.32	-0.32
COL4A1	ENST00000375820.4	collagen, type IV, alpha 1	6549	1	1	0	0	0	0	0	0	0	hsa-miR-148a-3p	-0.31	-0.32
DCUN1D4	ENST00000334635.5	DCN1, defective in cullin neddylation 1, domain containing 4	1118	1	0	1	0	0	0	0	0	0	hsa-miR-148a-3p	-0.31	-0.31
BCL7B	ENST00000223368.2	B-cell CLL/lymphoma 7B	4037	1	0	0	1	0	0	0	0	1	hsa-miR-148a-3p	-0.31	-0.31
PAPD4	ENST00000453514.1	PAP associated domain containing 4	434	1	0	1	0	0	0	0	0	0	hsa-miR-148a-3p	-0.31	-0.31
DRGX	ENST00000374139.2	dorsal root ganglia homeobox	5	1	0	0	1	0	0	0	0	0	hsa-miR-148a-3p	-0.31	-0.31
CERS5	ENST00000317551.6	ceramide synthase 5	86	1	0	0	1	0	0	0	0	0	hsa-miR-148a-3p	-0.31	-0.31
CNOT7	ENST00000361272.4	CCR4-NOT transcription complex, subunit 7	415	1	0	0	1	0	0	0	0	0	hsa-miR-148a-3p	-0.31	-0.31
ATP11A	ENST00000487903.1	ATPase, class VI, type 11A	731	2	2	0	0	1	0	1	0	2	hsa-miR-148b-3p	-0.31	-0.36
SRPK2	ENST00000393651.3	SRSF protein kinase 2	381	1	0	1	0	0	0	0	0	0	hsa-miR-148a-3p	-0.31	-0.31
CYTH3	ENST00000350796.3	cytohesin 3	248	1	1	0	0	0	0	0	0	0	hsa-miR-152-3p	-0.31	-0.33
CAMK2A	ENST00000348628.6	calcium/calmodulin-dependent protein kinase II alpha	5	1	0	1	0	2	0	0	2	2	hsa-miR-152-3p	-0.31	-0.31
NOL4	ENST00000261592.5	nucleolar protein 4	12	1	1	0	0	0	0	0	0	0	hsa-miR-148a-3p	-0.31	-0.31
PTPN14	ENST00000366956.5	protein tyrosine phosphatase, non-receptor type 14	301	1	0	1	0	1	0	1	0	1	hsa-miR-148a-3p	-0.31	-0.34
IL6ST	ENST00000381287.4	interleukin 6 signal transducer (gp130, oncostatin M receptor)	213	1	1	0	0	0	0	0	0	1	hsa-miR-148a-3p	-0.31	-0.31
FOXK2	ENST00000335255.5	forkhead box K2	450	1	0	0	1	0	0	0	0	1	hsa-miR-148a-3p	-0.31	-0.38
HECW2	ENST00000260983.3	HECT, C2 and WW domain containing E3 ubiquitin protein ligase 2	28	1	1	0	0	0	0	0	0	0	hsa-miR-152-3p	-0.31	-0.31
SYNJ1	ENST00000357345.3	synaptojanin 1	143	1	1	0	0	2	0	2	0	0	hsa-miR-148a-3p	-0.31	-0.33
UBE2D3	ENST00000453744.2	ubiquitin-conjugating enzyme E2D 3	2312	2	0	1	1	0	0	0	0	0	hsa-miR-148a-3p	-0.31	-0.6
DYRK1B	ENST00000593685.1	dual-specificity tyrosine-(Y)-phosphorylation regulated kinase 1B	7	1	1	0	0	0	0	0	0	0	hsa-miR-148a-3p	-0.3	-0.3
GAPVD1	ENST00000470056.1	GTPase activating protein and VPS9 domains 1	1805	1	1	0	0	0	0	0	0	0	hsa-miR-148a-3p	-0.3	-0.31
SYT2	ENST00000367267.1	synaptotagmin II	5	1	1	0	0	1	0	0	1	1	hsa-miR-152-3p	-0.3	-0.3
CHD1	ENST00000284049.3	chromodomain helicase DNA binding protein 1	35	1	0	1	0	0	0	0	0	0	hsa-miR-148a-3p	-0.3	-0.3
MTMR10	ENST00000435680.1	myotubularin related protein 10	30	1	0	1	0	1	0	1	0	0	hsa-miR-148a-3p	-0.3	-0.32
ARL6IP1	ENST00000304414.7	ADP-ribosylation factor-like 6 interacting protein 1	25	1	1	0	0	0	0	0	0	0	hsa-miR-148a-3p	-0.3	-0.58
GDF6	ENST00000287020.5	growth differentiation factor 6	14	1	0	1	0	0	0	0	0	0	hsa-miR-148a-3p	-0.3	-0.3
PI4KA	ENST00000255882.6	phosphatidylinositol 4-kinase, catalytic, alpha	5	1	0	1	0	0	0	0	0	0	hsa-miR-148a-3p	-0.3	-0.3
MDGA2	ENST00000439988.3	MAM domain-containing glycosylphosphatidylinositol anchor protein 2	0	1	0	1	0	0	0	0	0	2	hsa-miR-148a-3p	-0.3	-0.3
RAB39B	ENST00000369454.3	RAB39B, member RAS oncogene family	10	1	0	1	0	0	0	0	0	2	hsa-miR-148a-3p	-0.3	-0.36
CS	ENST00000548567.1	citrate synthase	52	1	0	0	1	0	0	0	0	0	hsa-miR-148a-3p	-0.3	-0.3
GPR137C	ENST00000321662.6	G protein-coupled receptor 137C	110	1	1	0	0	0	0	0	0	0	hsa-miR-148a-3p	-0.3	-0.33
RLIM	ENST00000332687.6	ring finger protein, LIM domain interacting	662	1	0	1	0	0	0	0	0	1	hsa-miR-148a-3p	-0.3	-0.35
PRRG1	ENST00000378628.4	proline rich Gla (G-carboxyglutamic acid) 1	1122	1	1	0	0	0	0	0	0	0	hsa-miR-148a-3p	-0.3	-0.3
TAF4	ENST00000252996.4	TAF4 RNA polymerase II, TATA box binding protein (TBP)-associated factor, 135kDa	61	1	0	1	0	0	0	0	0	0	hsa-miR-148a-3p	-0.3	-0.31
TEAD1	ENST00000361905.4	TEA domain family member 1 (SV40 transcriptional enhancer factor)	740	1	0	1	0	1	0	1	0	1	hsa-miR-152-3p	-0.3	-0.3
CCDC85A	ENST00000407595.2	coiled-coil domain containing 85A	46	1	0	1	0	0	0	0	0	0	hsa-miR-148a-3p	-0.3	-0.3
STK38L	ENST00000389032.3	serine/threonine kinase 38 like	705	1	0	1	0	0	0	0	0	1	hsa-miR-148a-3p	-0.3	-0.33
FAM161A	ENST00000404929.1	family with sequence similarity 161, member A	275	1	1	0	0	0	0	0	0	0	hsa-miR-148a-3p	-0.29	-0.29
BCL7A	ENST00000538010.1	B-cell CLL/lymphoma 7A	96	1	0	1	0	1	0	0	1	0	hsa-miR-148a-3p	-0.29	-0.35
CHD7	ENST00000423902.2	chromodomain helicase DNA binding protein 7	925	1	0	1	0	1	0	0	1	0	hsa-miR-148a-3p	-0.29	-0.31
PRICKLE2	ENST00000295902.6	prickle homolog 2 (Drosophila)	20	1	0	1	0	1	0	0	1	0	hsa-miR-148a-3p	-0.29	-0.29
LIN28A	ENST00000326279.6	lin-28 homolog A (C. elegans)	5	1	0	1	0	0	0	0	0	1	hsa-miR-148a-3p	-0.29	-0.29
MAX	ENST00000284165.6	MYC associated factor X	51	1	0	1	0	1	0	1	0	0	hsa-miR-148a-3p	-0.29	-0.29
ABCB10	ENST00000344517.4	ATP-binding cassette, sub-family B (MDR/TAP), member 10	53	1	0	0	1	0	0	0	0	0	hsa-miR-148a-3p	-0.29	-0.29
CECR6	ENST00000399875.1	cat eye syndrome chromosome region, candidate 6	5	1	1	0	0	0	0	0	0	1	hsa-miR-148a-3p	-0.29	-0.29
DMXL1	ENST00000311085.8	Dmx-like 1	136	1	1	0	0	0	0	0	0	0	hsa-miR-148a-3p	-0.29	-0.29
RALBP1	ENST00000383432.3	ralA binding protein 1	134	1	0	1	0	0	0	0	0	0	hsa-miR-148a-3p	-0.29	-0.29
SOCS3	ENST00000330871.2	suppressor of cytokine signaling 3	5	1	0	0	1	0	0	0	0	1	hsa-miR-148a-3p	-0.29	-0.29
E2F7	ENST00000416496.2	E2F transcription factor 7	308	1	0	1	0	0	0	0	0	0	hsa-miR-148a-3p	-0.29	-0.31
PPP1R12A	ENST00000261207.5	protein phosphatase 1, regulatory subunit 12A	276	1	0	1	0	0	0	0	0	0	hsa-miR-148a-3p	-0.29	-0.29
PAG1	ENST00000220597.4	phosphoprotein associated with glycosphingolipid microdomains 1	53	1	1	0	0	0	0	0	0	2	hsa-miR-148a-3p	-0.29	-0.29
RAB14	ENST00000373840.4	RAB14, member RAS oncogene family	586	2	0	1	1	0	0	0	0	1	hsa-miR-148a-3p	-0.29	-0.62
USP47	ENST00000339865.5	ubiquitin specific peptidase 47	665	1	0	0	1	0	0	0	0	1	hsa-miR-148a-3p	-0.29	-0.38
ARHGAP21	ENST00000396432.2	Rho GTPase activating protein 21	10	1	0	1	0	0	0	0	0	0	hsa-miR-148a-3p	-0.29	-0.29
MCM3AP	ENST00000397708.1	minichromosome maintenance complex component 3 associated protein	240	1	0	1	0	0	0	0	0	0	hsa-miR-148a-3p	-0.29	-0.29
GPCPD1	ENST00000379019.4	glycerophosphocholine phosphodiesterase GDE1 homolog (S. cerevisiae)	155	1	0	1	0	0	0	0	0	1	hsa-miR-148a-3p	-0.29	-0.36
TGIF2	ENST00000373874.2	TGFB-induced factor homeobox 2	192	2	1	1	0	1	0	1	0	0	hsa-miR-148a-3p	-0.29	-0.32
TAF1D	ENST00000448108.2	TATA box binding protein (TBP)-associated factor, RNA polymerase I, D, 41kDa	132	1	0	1	0	1	1	0	0	2	hsa-miR-148a-3p	-0.29	-0.39
ZNF217	ENST00000371471.2	zinc finger protein 217	668	1	0	1	0	0	0	0	0	0	hsa-miR-148a-3p	-0.28	-0.28
ZNRF1	ENST00000335325.4	zinc and ring finger 1, E3 ubiquitin protein ligase	519	1	1	0	0	0	0	0	0	3	hsa-miR-148a-3p	-0.28	-0.31
VSNL1	ENST00000406397.1	visinin-like 1	89	1	0	0	1	0	0	0	0	0	hsa-miR-148a-3p	-0.28	-0.28
KPNA4	ENST00000334256.4	karyopherin alpha 4 (importin alpha 3)	111	1	0	0	1	0	0	0	0	0	hsa-miR-148a-3p	-0.28	-0.28
LRP4	ENST00000378623.1	low density lipoprotein receptor-related protein 4	152	1	0	0	1	0	0	0	0	0	hsa-miR-148a-3p	-0.28	-0.28
ADAMTS18	ENST00000282849.5	ADAM metallopeptidase with thrombospondin type 1 motif, 18	7	1	0	1	0	0	0	0	0	0	hsa-miR-148a-3p	-0.28	-0.28
MTSS1L	ENST00000338779.6	metastasis suppressor 1-like	2982	1	0	1	0	0	0	0	0	0	hsa-miR-152-3p	-0.28	-0.28
DLG2	ENST00000398309.2	discs, large homolog 2 (Drosophila)	15	1	1	0	0	1	0	1	0	0	hsa-miR-152-3p	-0.28	-0.28
PSEN1	ENST00000344094.3	presenilin 1	1340	1	0	0	1	0	0	0	0	0	hsa-miR-148a-3p	-0.28	-0.28
PCYT1B	ENST00000379145.1	phosphate cytidylyltransferase 1, choline, beta	5	1	1	0	0	0	0	0	0	0	hsa-miR-148a-3p	-0.28	-0.28
PRKAG2	ENST00000287878.4	protein kinase, AMP-activated, gamma 2 non-catalytic subunit	273	1	0	1	0	0	0	0	0	0	hsa-miR-148a-3p	-0.28	-0.28
ELAVL2	ENST00000380110.4	ELAV like neuron-specific RNA binding protein 2	78	1	1	0	0	0	0	0	0	0	hsa-miR-148a-3p	-0.27	-0.3
CDK14	ENST00000380050.3	cyclin-dependent kinase 14	226	1	1	0	0	0	0	0	0	1	hsa-miR-148a-3p	-0.27	-0.28
JARID2	ENST00000341776.2	jumonji, AT rich interactive domain 2	199	1	1	0	0	0	0	0	0	0	hsa-miR-148a-3p	-0.27	-0.27
CALR	ENST00000316448.5	calreticulin	17017	1	0	0	1	0	0	0	0	0	hsa-miR-152-3p	-0.27	-0.27
RASSF8	ENST00000541490.1	Ras association (RalGDS/AF-6) domain family (N-terminal) member 8	1290	1	1	0	0	0	0	0	0	0	hsa-miR-148a-3p	-0.27	-0.27
PITPNM2	ENST00000280562.5	phosphatidylinositol transfer protein, membrane-associated 2	66	1	1	0	0	1	0	0	1	1	hsa-miR-148a-3p	-0.27	-0.27
SFMBT1	ENST00000394752.3	Scm-like with four mbt domains 1	116	2	0	1	1	0	0	0	0	1	hsa-miR-148a-3p	-0.27	-0.32
ERLIN1	ENST00000421367.2	ER lipid raft associated 1	86	1	0	1	0	0	0	0	0	0	hsa-miR-148a-3p	-0.27	-0.27
KCNQ4	ENST00000347132.5	potassium voltage-gated channel, KQT-like subfamily, member 4	46	1	0	1	0	1	0	1	0	0	hsa-miR-148a-3p	-0.27	-0.27
ROBO2	ENST00000461745.1	roundabout, axon guidance receptor, homolog 2 (Drosophila)	22	1	0	1	0	0	0	0	0	0	hsa-miR-148a-3p	-0.27	-0.27
FLJ00418	ENST00000597002.1		5	1	0	0	1	0	0	0	0	0	hsa-miR-148a-3p	-0.27	-0.27
CEP55	ENST00000371485.3	centrosomal protein 55kDa	92	1	0	1	0	0	0	0	0	0	hsa-miR-148a-3p	-0.27	-0.3
TMEM9B	ENST00000309134.5	TMEM9 domain family, member B	195	1	1	0	0	0	0	0	0	0	hsa-miR-148a-3p	-0.27	-0.59
MMS19	ENST00000327277.7	MMS19 nucleotide excision repair homolog (S. cerevisiae)	1062	1	1	0	0	0	0	0	0	2	hsa-miR-148a-3p	-0.27	-0.29
ARPP19	ENST00000566423.1	cAMP-regulated phosphoprotein, 19kDa	1316	1	0	1	0	0	0	0	0	0	hsa-miR-148a-3p	-0.27	-0.27
FAM21B	ENST00000358474.5	family with sequence similarity 21, member B	0	1	0	1	0	0	0	0	0	0	hsa-miR-148a-3p	-0.27	-0.27
GPM6A	ENST00000280187.7	glycoprotein M6A	335	1	1	0	0	0	0	0	0	0	hsa-miR-148a-3p	-0.27	-0.27
GMFB	ENST00000554908.1	glia maturation factor, beta	15	1	0	1	0	0	0	0	0	0	hsa-miR-148a-3p	-0.27	-0.43
SH2B3	ENST00000341259.2	SH2B adaptor protein 3	89	1	0	1	0	0	0	0	0	0	hsa-miR-148a-3p	-0.27	-0.27
FAM21D	ENST00000311663.5	family with sequence similarity 21, member D	5	1	0	1	0	0	0	0	0	0	hsa-miR-148a-3p	-0.27	-0.27
SERBP1	ENST00000370994.4	SERPINE1 mRNA binding protein 1	926	2	1	1	0	0	0	0	0	1	hsa-miR-152-3p	-0.27	-0.29
ABCA1	ENST00000374736.3	ATP-binding cassette, sub-family A (ABC1), member 1	184	1	0	1	0	0	0	0	0	1	hsa-miR-148a-3p	-0.26	-0.28
STXBP5	ENST00000367481.3	syntaxin binding protein 5 (tomosyn)	555	1	0	0	1	1	0	1	0	0	hsa-miR-152-3p	-0.26	-0.45
LTBP1	ENST00000404525.1	latent transforming growth factor beta binding protein 1	5324	1	0	1	0	0	0	0	0	0	hsa-miR-148a-3p	-0.26	-0.26
SKIDA1	ENST00000449193.2	SKI/DACH domain containing 1	18	1	0	1	0	0	0	0	0	0	hsa-miR-148a-3p	-0.26	-0.42
ARHGEF12	ENST00000397843.2	Rho guanine nucleotide exchange factor (GEF) 12	815	1	1	0	0	0	0	0	0	0	hsa-miR-148a-3p	-0.26	-0.27
TET2	ENST00000545826.1	tet methylcytosine dioxygenase 2	558	1	1	0	0	0	0	0	0	0	hsa-miR-148a-3p	-0.26	-0.26
DNAJB12	ENST00000338820.3	DnaJ (Hsp40) homolog, subfamily B, member 12	1458	1	1	0	0	0	0	0	0	0	hsa-miR-148a-3p	-0.26	-0.26
ZADH2	ENST00000322342.3	zinc binding alcohol dehydrogenase domain containing 2	207	1	1	0	0	2	0	1	1	0	hsa-miR-148a-3p	-0.26	-0.44
PPARD	ENST00000448077.2	peroxisome proliferator-activated receptor delta	239	1	0	0	1	1	0	1	0	1	hsa-miR-152-3p	-0.26	-0.26
C12orf79	ENST00000549802.1	chromosome 12 open reading frame 79	5	1	0	1	0	0	0	0	0	0	hsa-miR-148a-3p	-0.26	-0.26
NHS	ENST00000380060.3	Nance-Horan syndrome (congenital cataracts and dental anomalies)	72	1	1	0	0	0	0	0	0	0	hsa-miR-148a-3p	-0.26	-0.26
FBXO33	ENST00000298097.7	F-box protein 33	306	1	0	1	0	1	0	1	0	1	hsa-miR-148a-3p	-0.26	-0.27
SMAD5	ENST00000545279.1	SMAD family member 5	225	1	0	1	0	2	0	2	0	0	hsa-miR-152-3p	-0.26	-0.34
CDK8	ENST00000536792.1	cyclin-dependent kinase 8	280	1	0	1	0	0	0	0	0	0	hsa-miR-148a-3p	-0.25	-0.26
FAM21A	ENST00000399339.2	family with sequence similarity 21, member A	5	1	0	1	0	0	0	0	0	0	hsa-miR-148a-3p	-0.25	-0.25
SPIRE1	ENST00000409402.4	spire-type actin nucleation factor 1	103	1	1	0	0	0	0	0	0	0	hsa-miR-148a-3p	-0.25	-0.27
AC068987.1	ENST00000599343.1	HCG1997999; cDNA FLJ33996 fis, clone DFNES2008881	44	1	0	1	0	0	0	0	0	0	hsa-miR-148a-3p	-0.25	-0.25
SIX4	ENST00000216513.4	SIX homeobox 4	94	1	0	1	0	1	0	0	1	0	hsa-miR-148a-3p	-0.25	-0.3
SLC7A5	ENST00000565644.1	solute carrier family 7 (amino acid transporter light chain, L system), member 5	155	1	1	0	0	0	0	0	0	2	hsa-miR-148a-3p	-0.25	-0.26
TCF4	ENST00000354452.3	transcription factor 4	394	1	0	0	1	2	0	2	0	0	hsa-miR-148a-3p	-0.25	-0.38
MARCH2	ENST00000602117.1	membrane-associated ring finger (C3HC4) 2, E3 ubiquitin protein ligase	909	1	0	1	0	0	0	0	0	0	hsa-miR-148a-3p	-0.25	-0.25
DUSP16	ENST00000298573.4	dual specificity phosphatase 16	444	1	0	1	0	0	0	0	0	0	hsa-miR-148a-3p	-0.25	-0.25
KIAA1324L	ENST00000450689.2	KIAA1324-like	181	1	0	1	0	1	0	0	1	0	hsa-miR-148a-3p	-0.25	-0.33
TSPAN18	ENST00000340160.3	tetraspanin 18	332	1	0	1	0	0	0	0	0	0	hsa-miR-148a-3p	-0.25	-0.33
PPARGC1A	ENST00000264867.2	peroxisome proliferator-activated receptor gamma, coactivator 1 alpha	19	1	0	1	0	0	0	0	0	0	hsa-miR-148a-3p	-0.25	-0.25
ATXN1	ENST00000244769.4	ataxin 1	106	1	1	0	0	0	0	0	0	0	hsa-miR-148a-3p	-0.25	-0.25
STT3A	ENST00000392708.4	STT3A, subunit of the oligosaccharyltransferase complex (catalytic)	3595	1	0	0	1	0	0	0	0	0	hsa-miR-148a-3p	-0.25	-0.25
FBN3	ENST00000600128.1	fibrillin 3	10	1	0	1	0	0	0	0	0	0	hsa-miR-148a-3p	-0.25	-0.25
MUM1L1	ENST00000357175.2	melanoma associated antigen (mutated) 1-like 1	50	1	0	1	0	0	0	0	0	0	hsa-miR-148a-3p	-0.25	-0.25
STARD13	ENST00000336934.5	StAR-related lipid transfer (START) domain containing 13	314	1	1	0	0	0	0	0	0	0	hsa-miR-148a-3p	-0.25	-0.36
PPAP2B	ENST00000371250.3	phosphatidic acid phosphatase type 2B	81	1	0	0	1	2	1	0	1	0	hsa-miR-148a-3p	-0.25	-0.41
KIAA1549	ENST00000440172.1	KIAA1549	508	1	0	1	0	1	0	0	1	1	hsa-miR-148a-3p	-0.25	-0.28
TGFB2	ENST00000366930.4	transforming growth factor, beta 2	157	1	1	0	0	0	0	0	0	0	hsa-miR-148a-3p	-0.24	-0.51
CNR1	ENST00000362094.5	cannabinoid receptor 1 (brain)	40	1	0	1	0	0	0	0	0	1	hsa-miR-152-3p	-0.24	-0.32
GAS1	ENST00000298743.7	growth arrest-specific 1	2904	1	0	1	0	0	0	0	0	0	hsa-miR-148a-3p	-0.24	-0.24
BACH2	ENST00000257749.4	BTB and CNC homology 1, basic leucine zipper transcription factor 2	74	1	1	0	0	0	0	0	0	1	hsa-miR-148a-3p	-0.24	-0.24
ATXN7L1	ENST00000419735.3	ataxin 7-like 1	67	1	1	0	0	0	0	0	0	0	hsa-miR-148a-3p	-0.24	-0.24
AC140061.12	ENST00000598429.1	Uncharacterized protein	11	1	0	1	0	0	0	0	0	0	hsa-miR-148a-3p	-0.24	-0.24
AQP11	ENST00000313578.3	aquaporin 11	75	1	0	1	0	0	0	0	0	0	hsa-miR-148a-3p	-0.24	-0.24
SNX2	ENST00000379516.2	sorting nexin 2	397	1	0	1	0	0	0	0	0	0	hsa-miR-148a-3p	-0.24	-0.32
OSTF1	ENST00000346234.6	osteoclast stimulating factor 1	107	1	0	1	0	0	0	0	0	0	hsa-miR-148a-3p	-0.24	-0.26
LYRM2	ENST00000520318.1	LYR motif containing 2	305	1	1	0	0	0	0	0	0	1	hsa-miR-148a-3p	-0.24	-0.38
ZNF784	ENST00000591479.1	zinc finger protein 784	19	1	0	1	0	0	0	0	0	0	hsa-miR-148a-3p	-0.24	-0.24
BBX	ENST00000415149.2	bobby sox homolog (Drosophila)	141	1	0	0	1	1	0	1	0	2	hsa-miR-148a-3p	-0.24	-0.27
MBOAT2	ENST00000305997.3	membrane bound O-acyltransferase domain containing 2	1145	1	0	0	1	1	0	1	0	2	hsa-miR-152-3p	-0.24	-0.3
EFNB2	ENST00000245323.4	ephrin-B2	25	1	0	1	0	0	0	0	0	0	hsa-miR-148a-3p	-0.24	-0.24
CAMSAP2	ENST00000358823.2	calmodulin regulated spectrin-associated protein family, member 2	235	1	0	0	1	0	0	0	0	0	hsa-miR-148a-3p	-0.24	-0.24
DHRS13	ENST00000378895.4	dehydrogenase/reductase (SDR family) member 13	596	1	0	1	0	0	0	0	0	0	hsa-miR-148b-3p	-0.24	-0.24
PIK3C2A	ENST00000265970.7	phosphatidylinositol-4-phosphate 3-kinase, catalytic subunit type 2 alpha	280	1	1	0	0	0	0	0	0	0	hsa-miR-148a-3p	-0.24	-0.32
E2F3	ENST00000346618.3	E2F transcription factor 3	91	1	0	1	0	0	0	0	0	0	hsa-miR-148a-3p	-0.24	-0.24
BRPF1	ENST00000383829.2	bromodomain and PHD finger containing, 1	351	1	1	0	0	0	0	0	0	0	hsa-miR-148a-3p	-0.24	-0.24
RNF44	ENST00000274811.4	ring finger protein 44	1623	1	0	1	0	1	0	0	1	1	hsa-miR-148a-3p	-0.24	-0.24
FAM21C	ENST00000336378.4	family with sequence similarity 21, member C	5	1	0	1	0	0	0	0	0	0	hsa-miR-148a-3p	-0.24	-0.24
C16orf52	ENST00000542527.2	chromosome 16 open reading frame 52	102	1	0	1	0	0	0	0	0	1	hsa-miR-152-3p	-0.24	-0.26
TBC1D8	ENST00000376840.4	TBC1 domain family, member 8 (with GRAM domain)	47	1	0	1	0	0	0	0	0	0	hsa-miR-148a-3p	-0.23	-0.3
MTMR12	ENST00000280285.5	myotubularin related protein 12	156	1	1	0	0	0	0	0	0	0	hsa-miR-148a-3p	-0.23	-0.4
LRFN1	ENST00000248668.4	leucine rich repeat and fibronectin type III domain containing 1	82	1	0	0	1	0	0	0	0	0	hsa-miR-148a-3p	-0.23	-0.23
ZFPM2	ENST00000407775.2	zinc finger protein, FOG family member 2	595	1	0	1	0	0	0	0	0	0	hsa-miR-148a-3p	-0.23	-0.23
HMGB3	ENST00000325307.7	high mobility group box 3	295	1	0	1	0	0	0	0	0	0	hsa-miR-148a-3p	-0.23	-0.23
EGR3	ENST00000519492.1	early growth response 3	21	1	0	1	0	0	0	0	0	0	hsa-miR-148a-3p	-0.23	-0.32
TERF2	ENST00000254942.3	telomeric repeat binding factor 2	709	1	0	1	0	0	0	0	0	0	hsa-miR-148a-3p	-0.23	-0.23
SOX5	ENST00000546136.1	SRY (sex determining region Y)-box 5	43	1	0	0	1	0	0	0	0	0	hsa-miR-148a-3p	-0.23	-0.23
SYT1	ENST00000457153.2	synaptotagmin I	13	1	0	1	0	0	0	0	0	1	hsa-miR-152-3p	-0.23	-0.23
DYRK1A	ENST00000339659.4	dual-specificity tyrosine-(Y)-phosphorylation regulated kinase 1A	448	1	1	0	0	0	0	0	0	2	hsa-miR-148b-3p	-0.23	-0.24
PVRL1	ENST00000264025.3	poliovirus receptor-related 1 (herpesvirus entry mediator C)	50	1	0	1	0	2	0	0	2	0	hsa-miR-152-3p	-0.23	-0.23
PTPRM	ENST00000332175.8	protein tyrosine phosphatase, receptor type, M	553	1	0	1	0	0	0	0	0	0	hsa-miR-148a-3p	-0.23	-0.23
TFDP2	ENST00000499676.2	transcription factor Dp-2 (E2F dimerization partner 2)	128	1	0	1	0	3	0	1	2	1	hsa-miR-148a-3p	-0.23	-0.86
ZBTB8A	ENST00000316459.4	zinc finger and BTB domain containing 8A	287	1	0	1	0	0	0	0	0	0	hsa-miR-148a-3p	-0.23	-0.23
LCOR	ENST00000371103.3	ligand dependent nuclear receptor corepressor	94	1	0	1	0	1	0	1	0	1	hsa-miR-148a-3p	-0.23	-0.23
AP1G1	ENST00000299980.4	adaptor-related protein complex 1, gamma 1 subunit	436	1	0	0	1	0	0	0	0	0	hsa-miR-148a-3p	-0.23	-0.23
PAQR9	ENST00000340634.3	progestin and adipoQ receptor family member IX	233	1	0	0	1	0	0	0	0	0	hsa-miR-148b-3p	-0.23	-0.23
MLLT6	ENST00000325718.7	myeloid/lymphoid or mixed-lineage leukemia (trithorax homolog, Drosophila); translocated to, 6	24	1	0	1	0	1	0	0	1	1	hsa-miR-148a-3p	-0.22	-0.29
NAT8L	ENST00000331662.3	N-acetyltransferase 8-like (GCN5-related, putative)	220	1	1	0	0	1	0	1	0	4	hsa-miR-148b-3p	-0.22	-0.24
HMGA2	ENST00000403681.2	high mobility group AT-hook 2	8021	1	0	1	0	0	0	0	0	0	hsa-miR-148a-3p	-0.22	-0.22
PIK3R3	ENST00000262741.5	phosphoinositide-3-kinase, regulatory subunit 3 (gamma)	335	1	1	0	0	0	0	0	0	0	hsa-miR-148a-3p	-0.22	-0.24
SLC24A4	ENST00000393265.2	solute carrier family 24 (sodium/potassium/calcium exchanger), member 4	5	1	0	1	0	2	0	1	1	0	hsa-miR-148b-3p	-0.22	-0.41
MYBL1	ENST00000522677.3	v-myb avian myeloblastosis viral oncogene homolog-like 1	53	1	0	1	0	0	0	0	0	0	hsa-miR-148a-3p	-0.22	-0.22
COL6A3	ENST00000295550.4	collagen, type VI, alpha 3	11346	1	0	1	0	0	0	0	0	0	hsa-miR-148a-3p	-0.22	-0.22
RALY	ENST00000375114.3	RALY heterogeneous nuclear ribonucleoprotein	1489	1	0	1	0	0	0	0	0	1	hsa-miR-152-3p	-0.22	-0.22
AMMECR1	ENST00000262844.5	Alport syndrome, mental retardation, midface hypoplasia and elliptocytosis chromosomal region gene 1	5	1	0	0	1	0	0	0	0	0	hsa-miR-148a-3p	-0.22	-0.22
SULF1	ENST00000458141.2	sulfatase 1	11	1	0	1	0	0	0	0	0	0	hsa-miR-148a-3p	-0.22	-0.22
ZDHHC23	ENST00000330212.3	zinc finger, DHHC-type containing 23	10	1	0	1	0	0	0	0	0	0	hsa-miR-148a-3p	-0.22	-0.3
[truncated: 245 more rows]

## Sheet: S2_DIANA-microT
Transcript Id	Gene Id(name)	name	Mirna Name	miTG score
[truncated: 870 more rows]

[truncated: 3 more sheets: S2_miRDB, S2_ovelap>=2, S3]
